# Supplementary material for: On the challenges of global entity-aware deep learning models for groundwater level prediction
Source: Copernicus journal article supplement (doi:10.5194/hess-28-525-2024), 2024-02-08

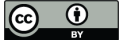

*Supplement of*

## **On the challenges of global entity-aware deep learning models for ground-water level prediction**

**Benedikt Heudorfer et al.**

*Correspondence to:* Benedikt Heudorfer ([benedikt.heudorfer@kit.edu](mailto:benedikt.heudorfer@kit.edu))

The copyright of individual parts of the supplement might differ from the article licence.

## **Supplementary Material**

Predictions of groundwater levels in the test period (2012-2015) for all 108 considered wells, for all model variants, including NSE scores.

BB\_27381010

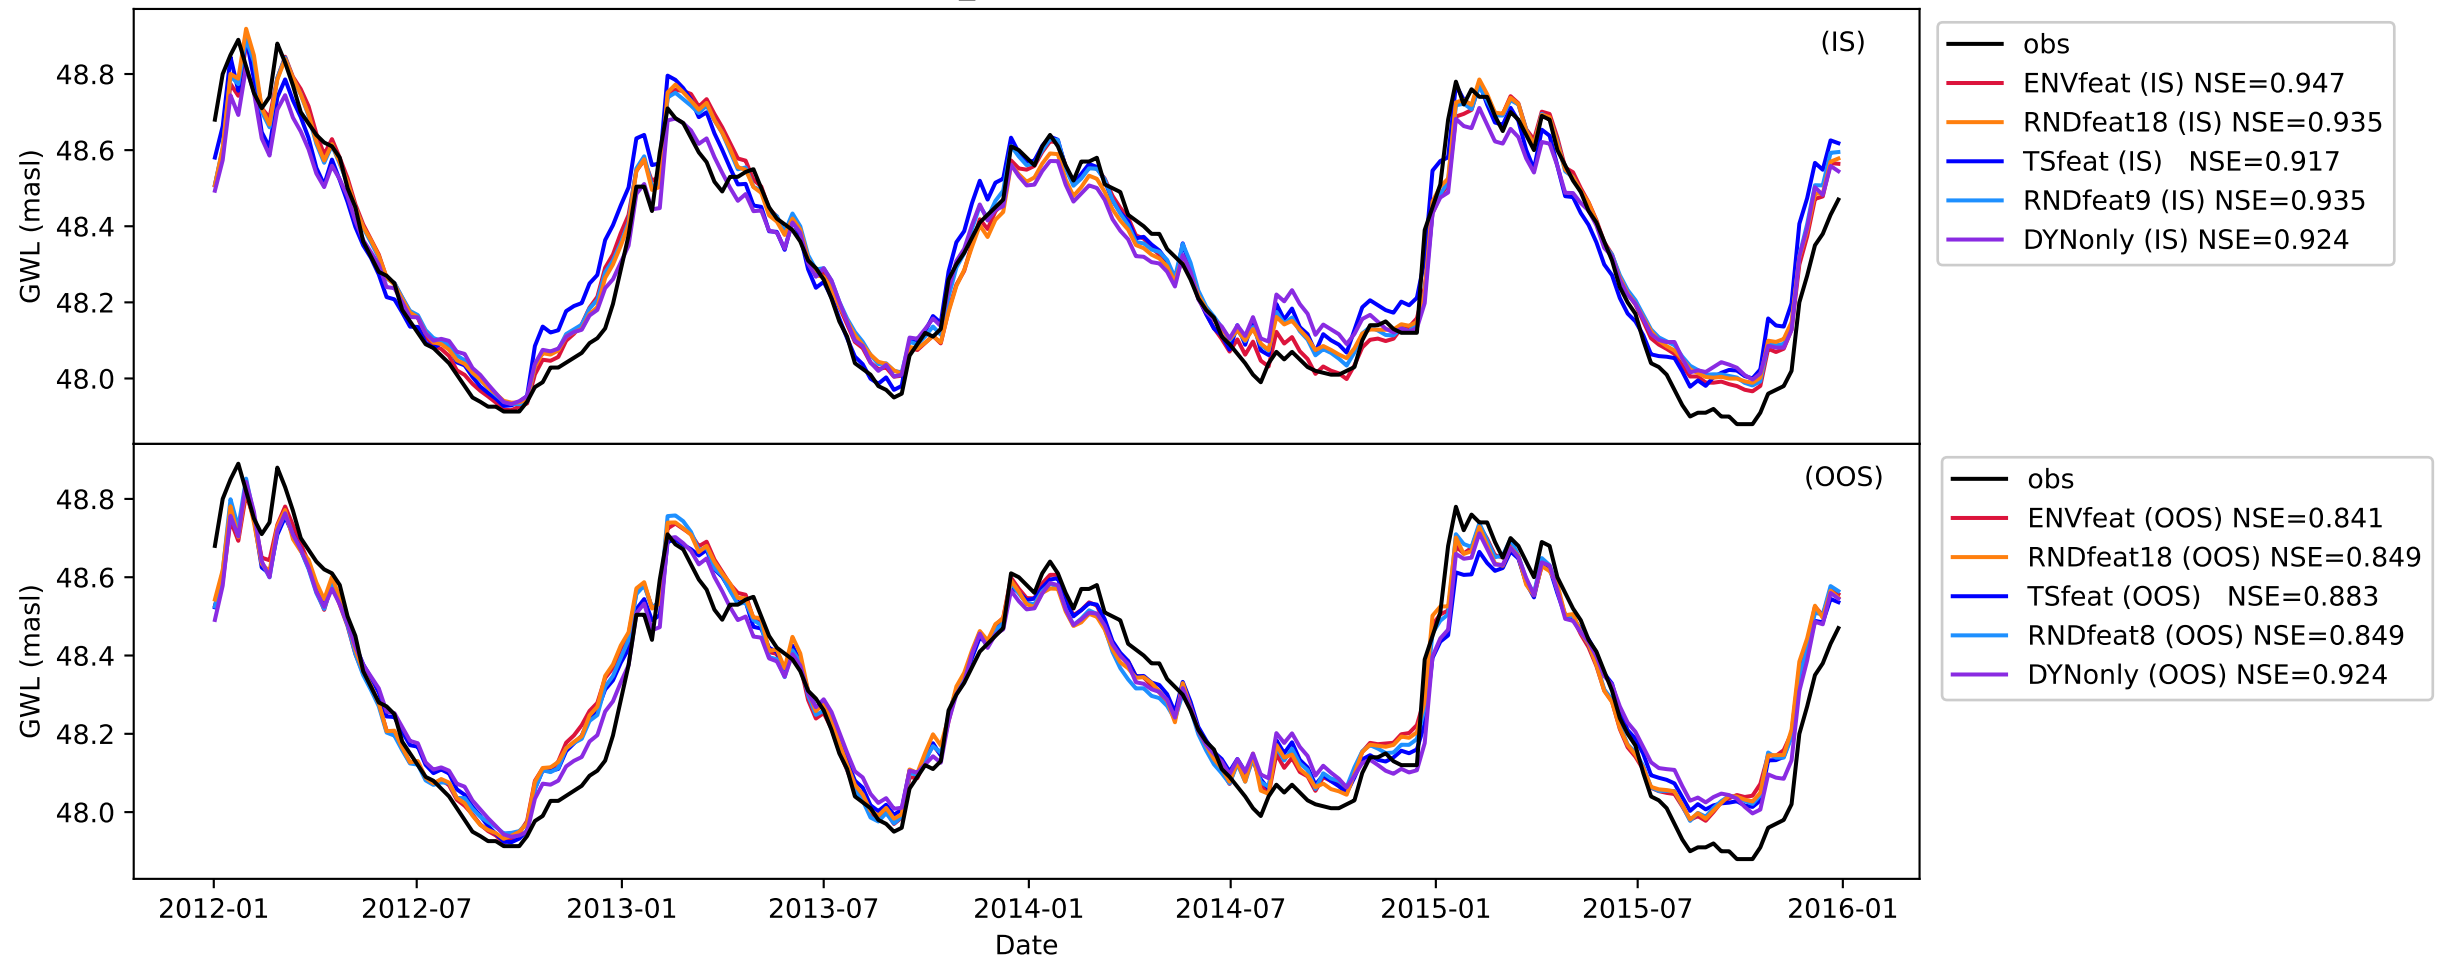

BB\_28390113

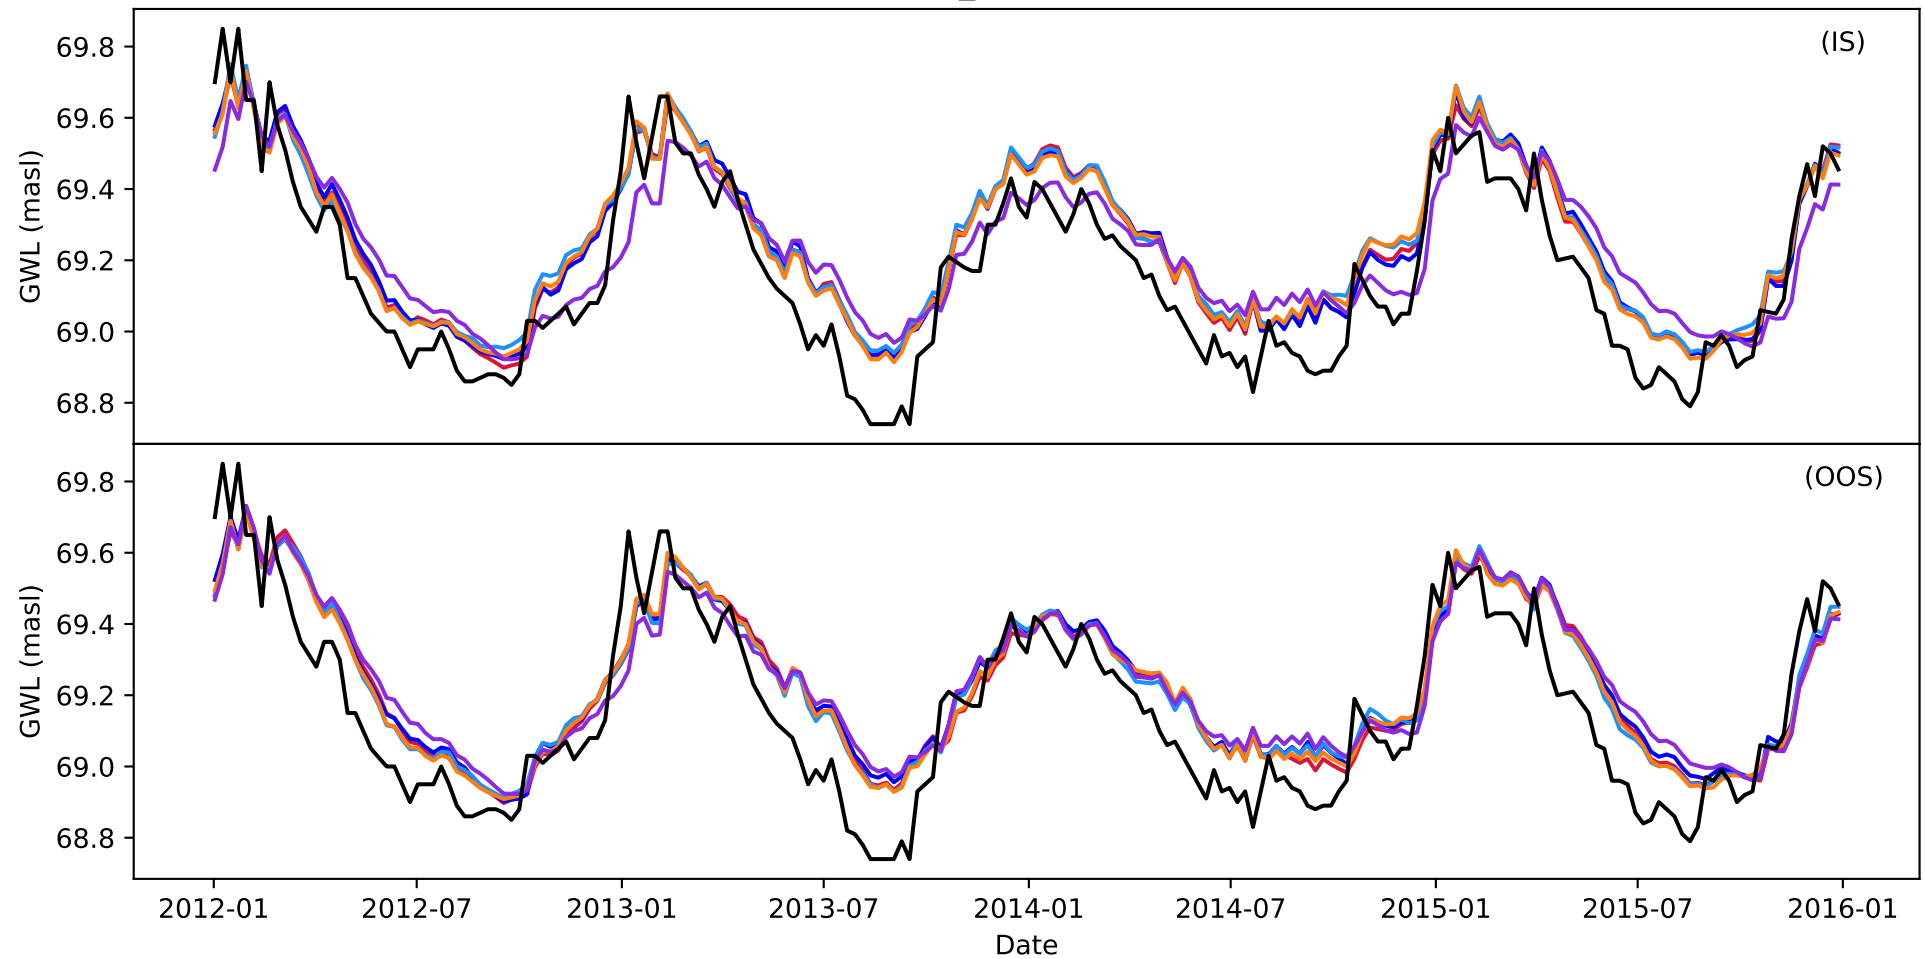

- obs
- ENVfeat (IS) NSE=0.799
- RNDfeat18 (IS) NSE=0.773
- TSfeat (IS) NSE=0.794
- RNDfeat9 (IS) NSE=0.773
- DYNOnly (IS) NSE=0.722

- obs
- ENVfeat (OOS) NSE=0.745
- RNDfeat18 (OOS) NSE=0.761
- TSfeat (OOS) NSE=0.738
- RNDfeat8 (OOS) NSE=0.761
- DYNOnly (OOS) NSE=0.696

BB\_30400591

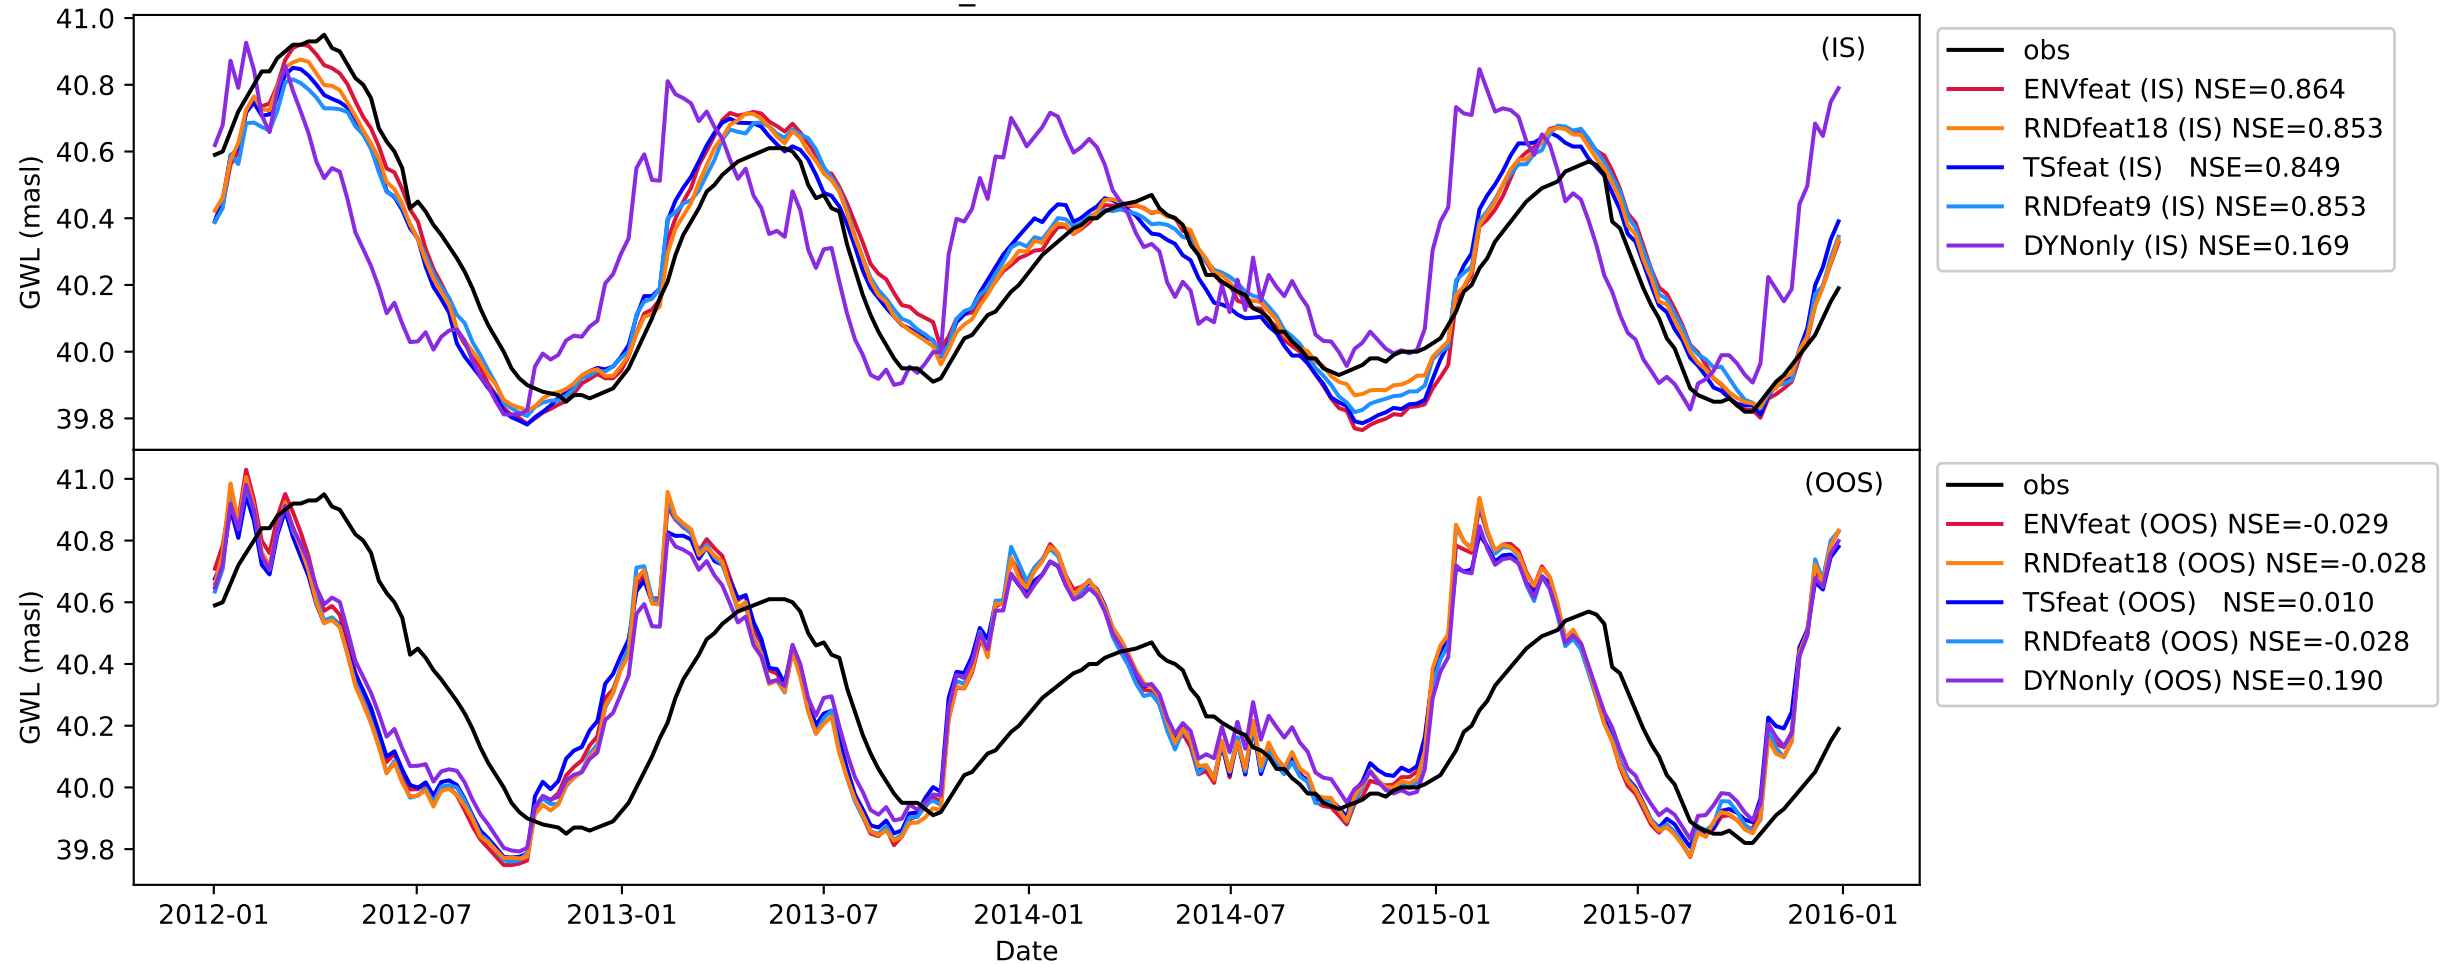

BB\_31400780

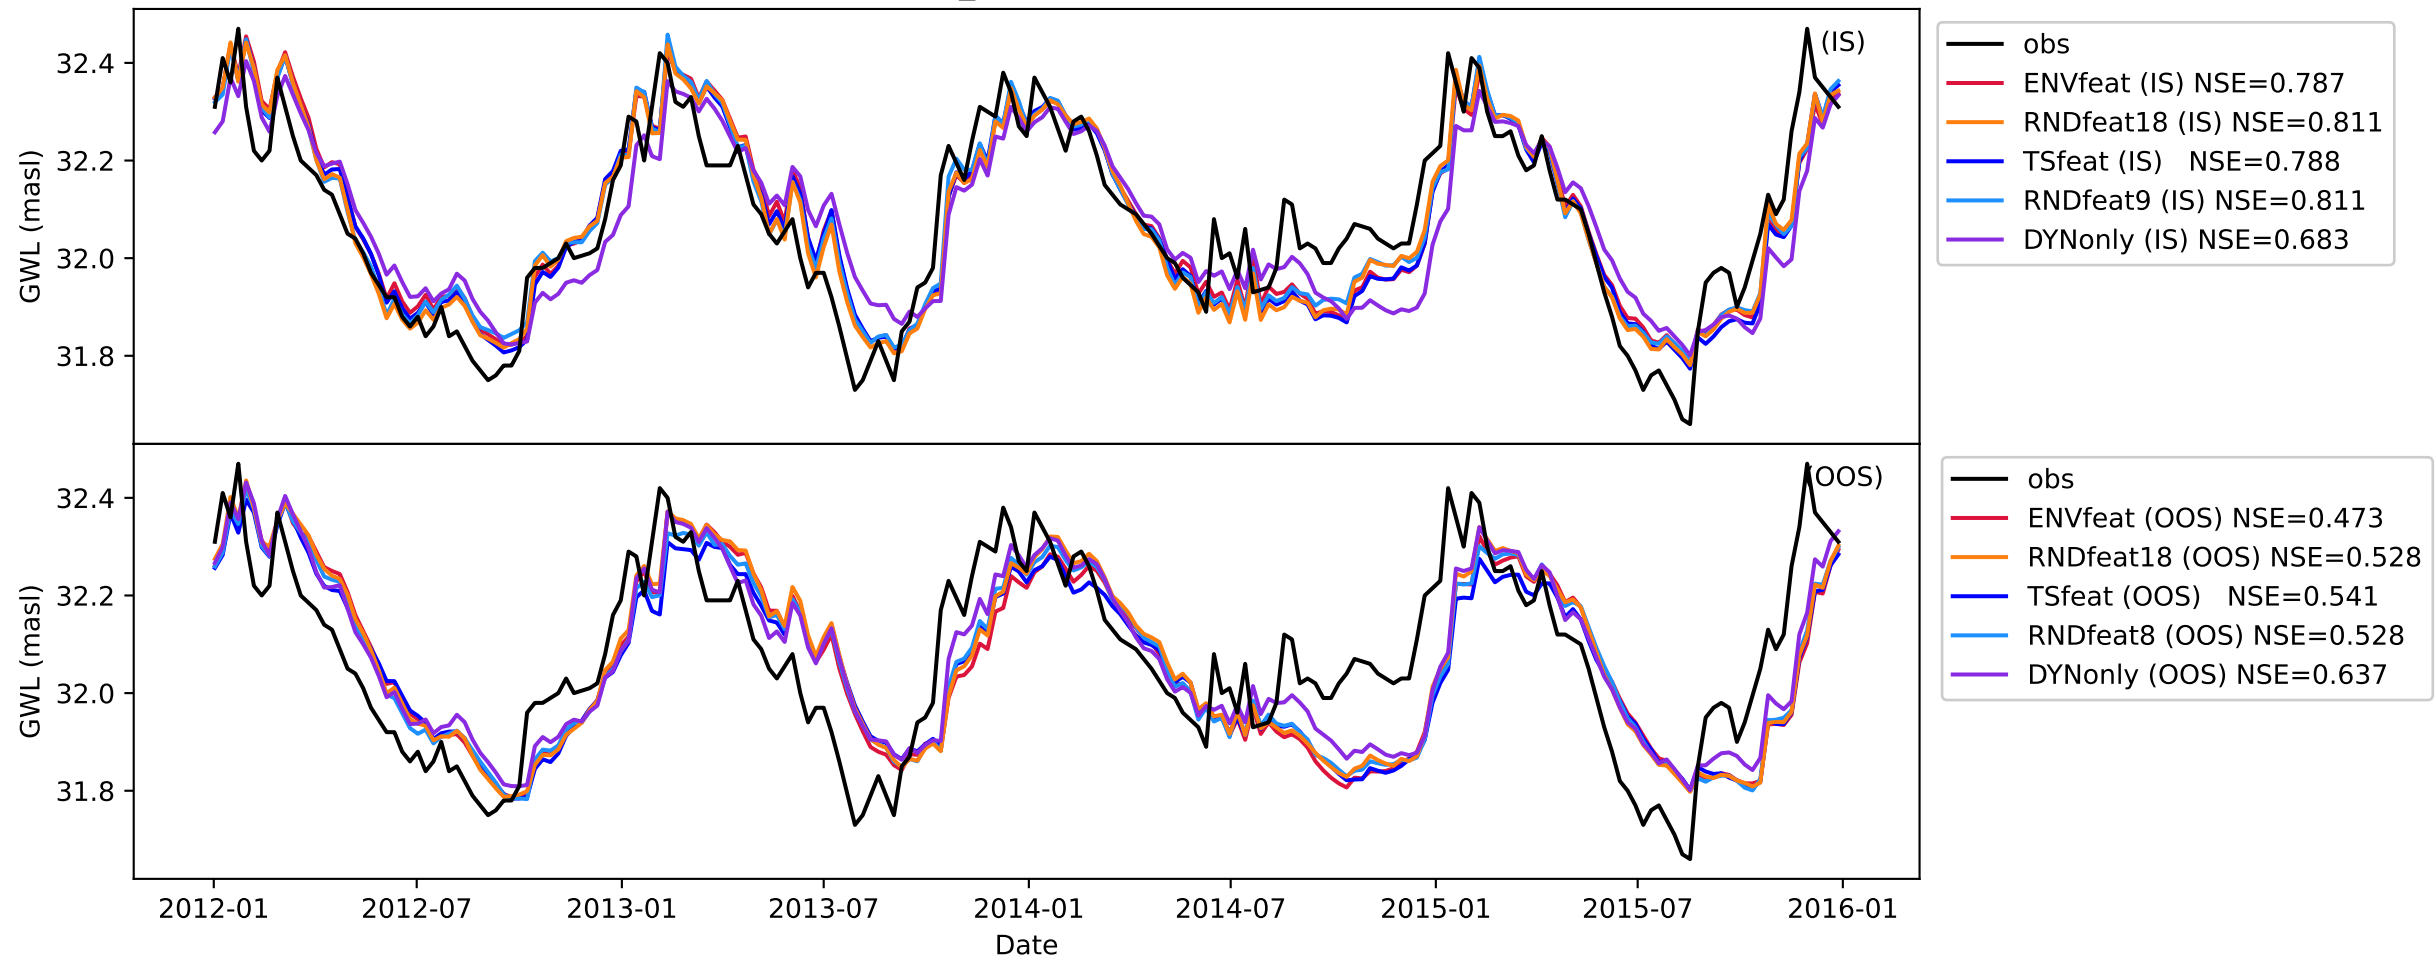

BB\_31491979

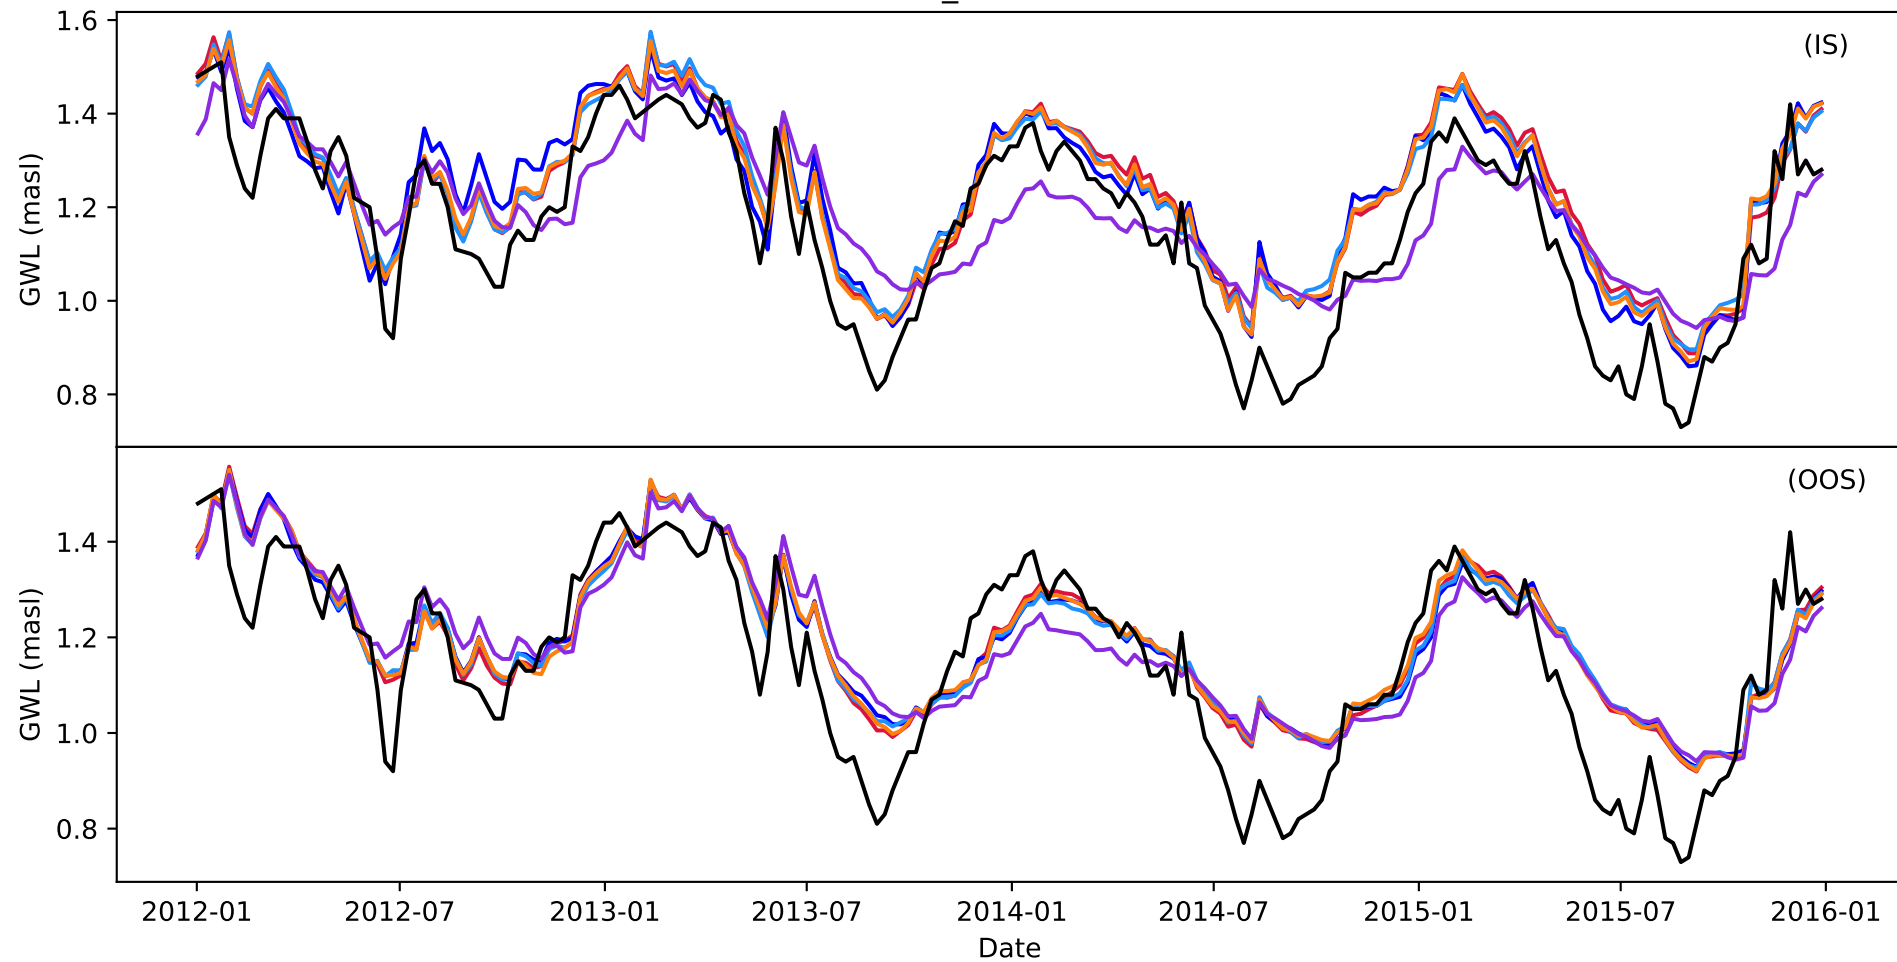

BB\_32455305

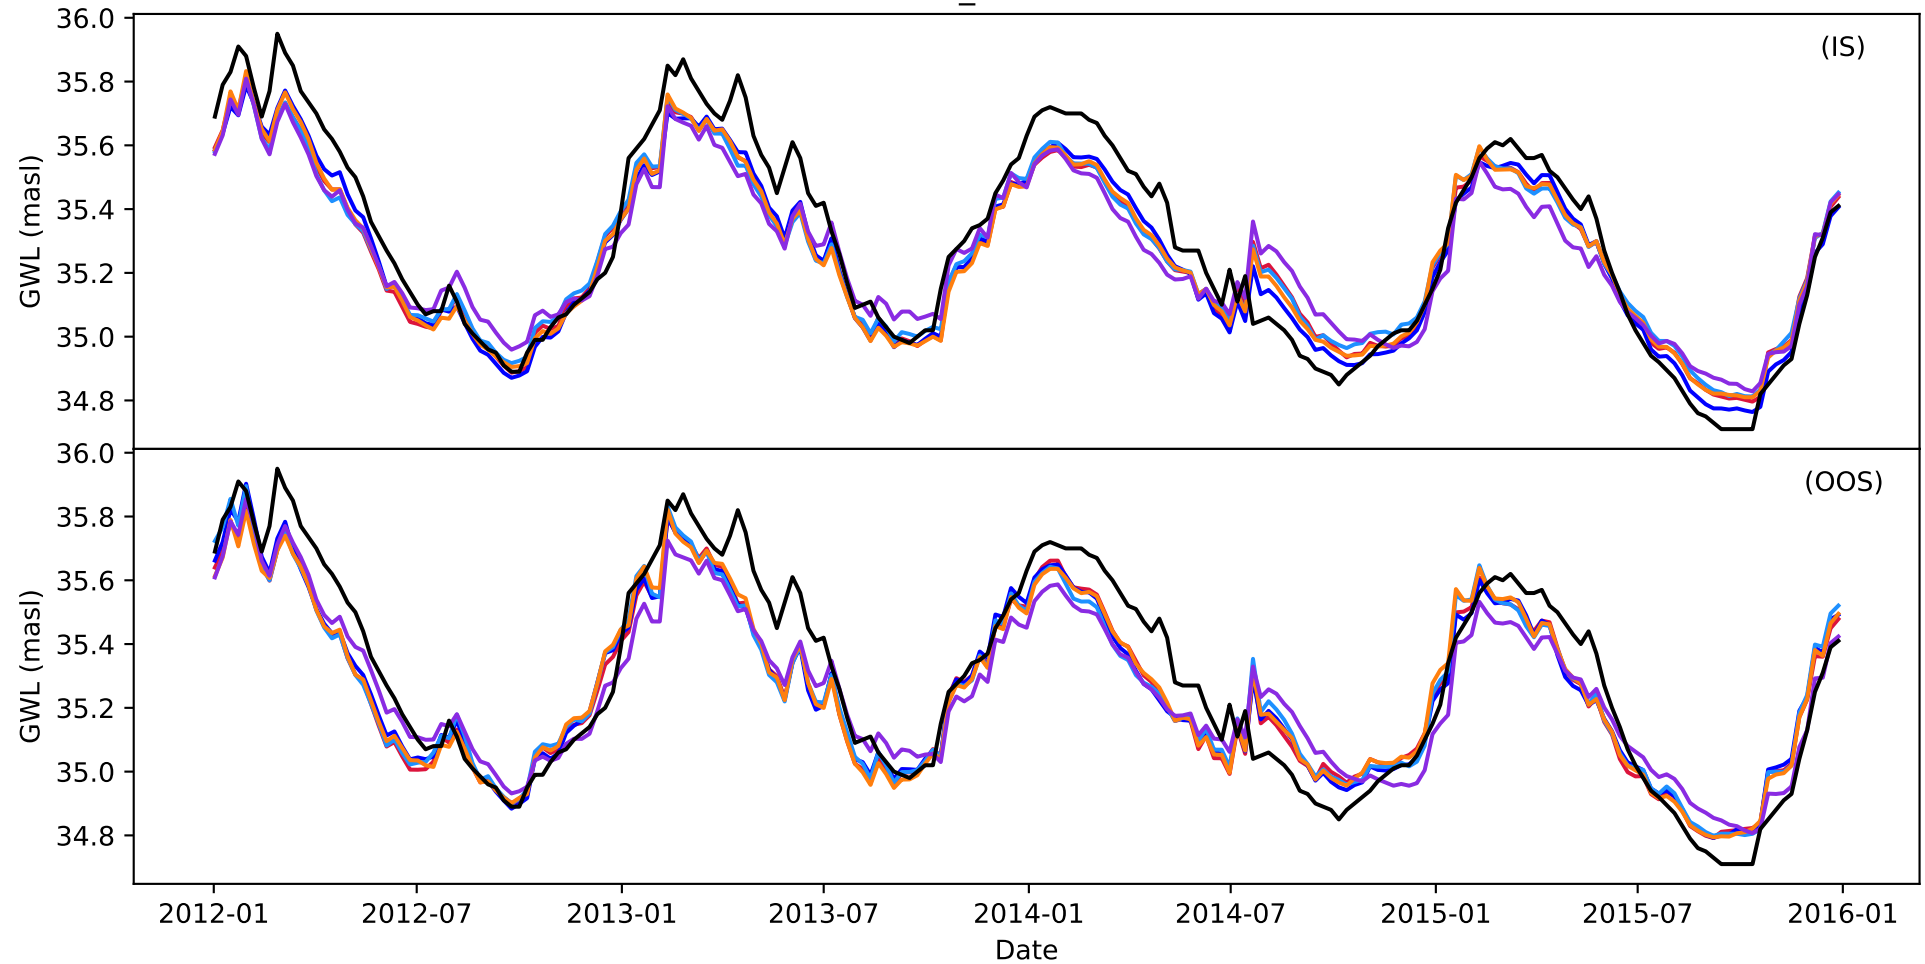

- obs
- ENVfeat (IS) NSE=0.892
- RNDfeat18 (IS) NSE=0.890
- TSfeat (IS) NSE=0.922
- RNDfeat9 (IS) NSE=0.890
- DYNOnly (IS) NSE=0.847

- obs
- ENVfeat (OOS) NSE=0.790
- RNDfeat18 (OOS) NSE=0.817
- TSfeat (OOS) NSE=0.859
- RNDfeat8 (OOS) NSE=0.817
- DYNOnly (OOS) NSE=0.859



BB\_33437070

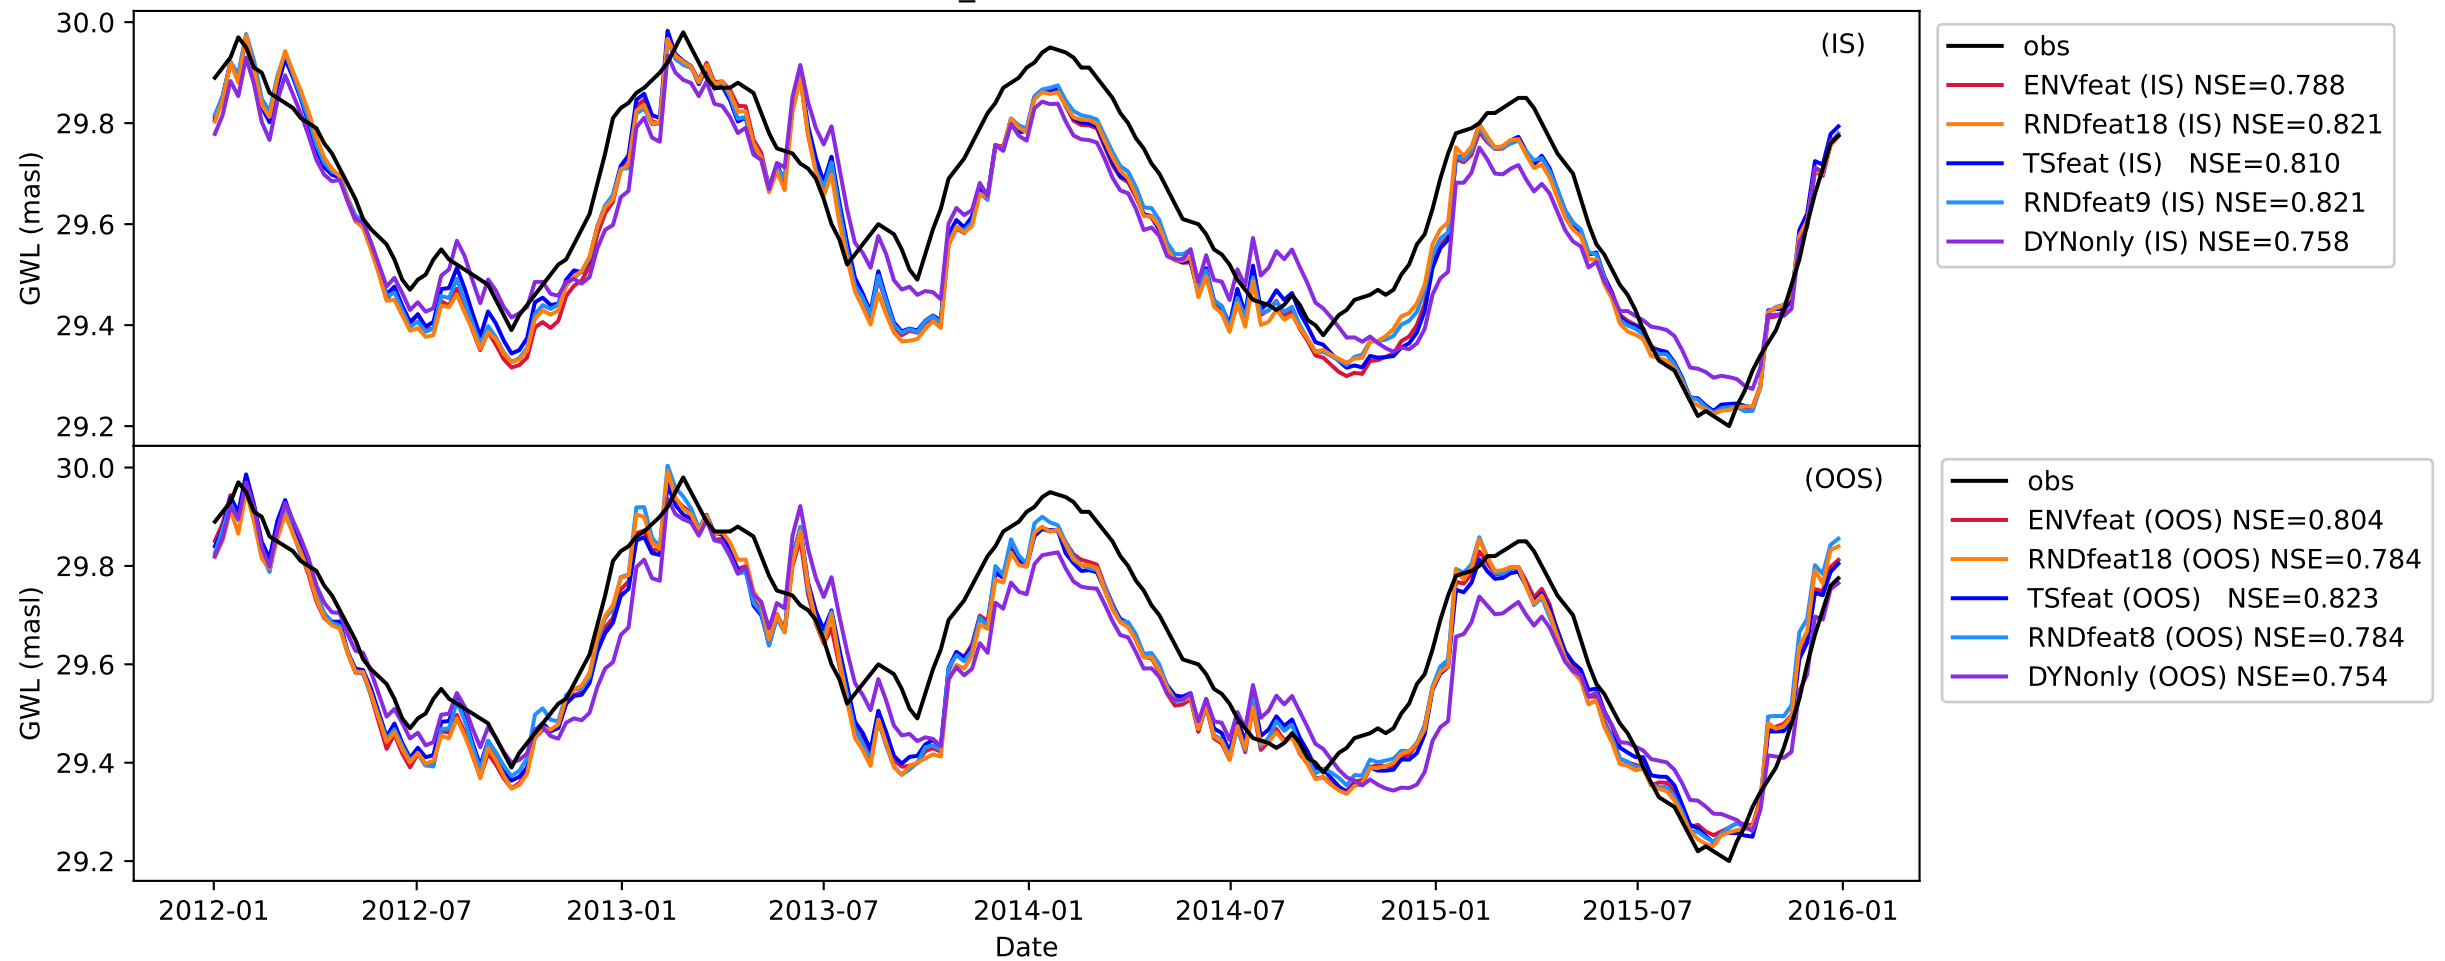

BB\_33437090

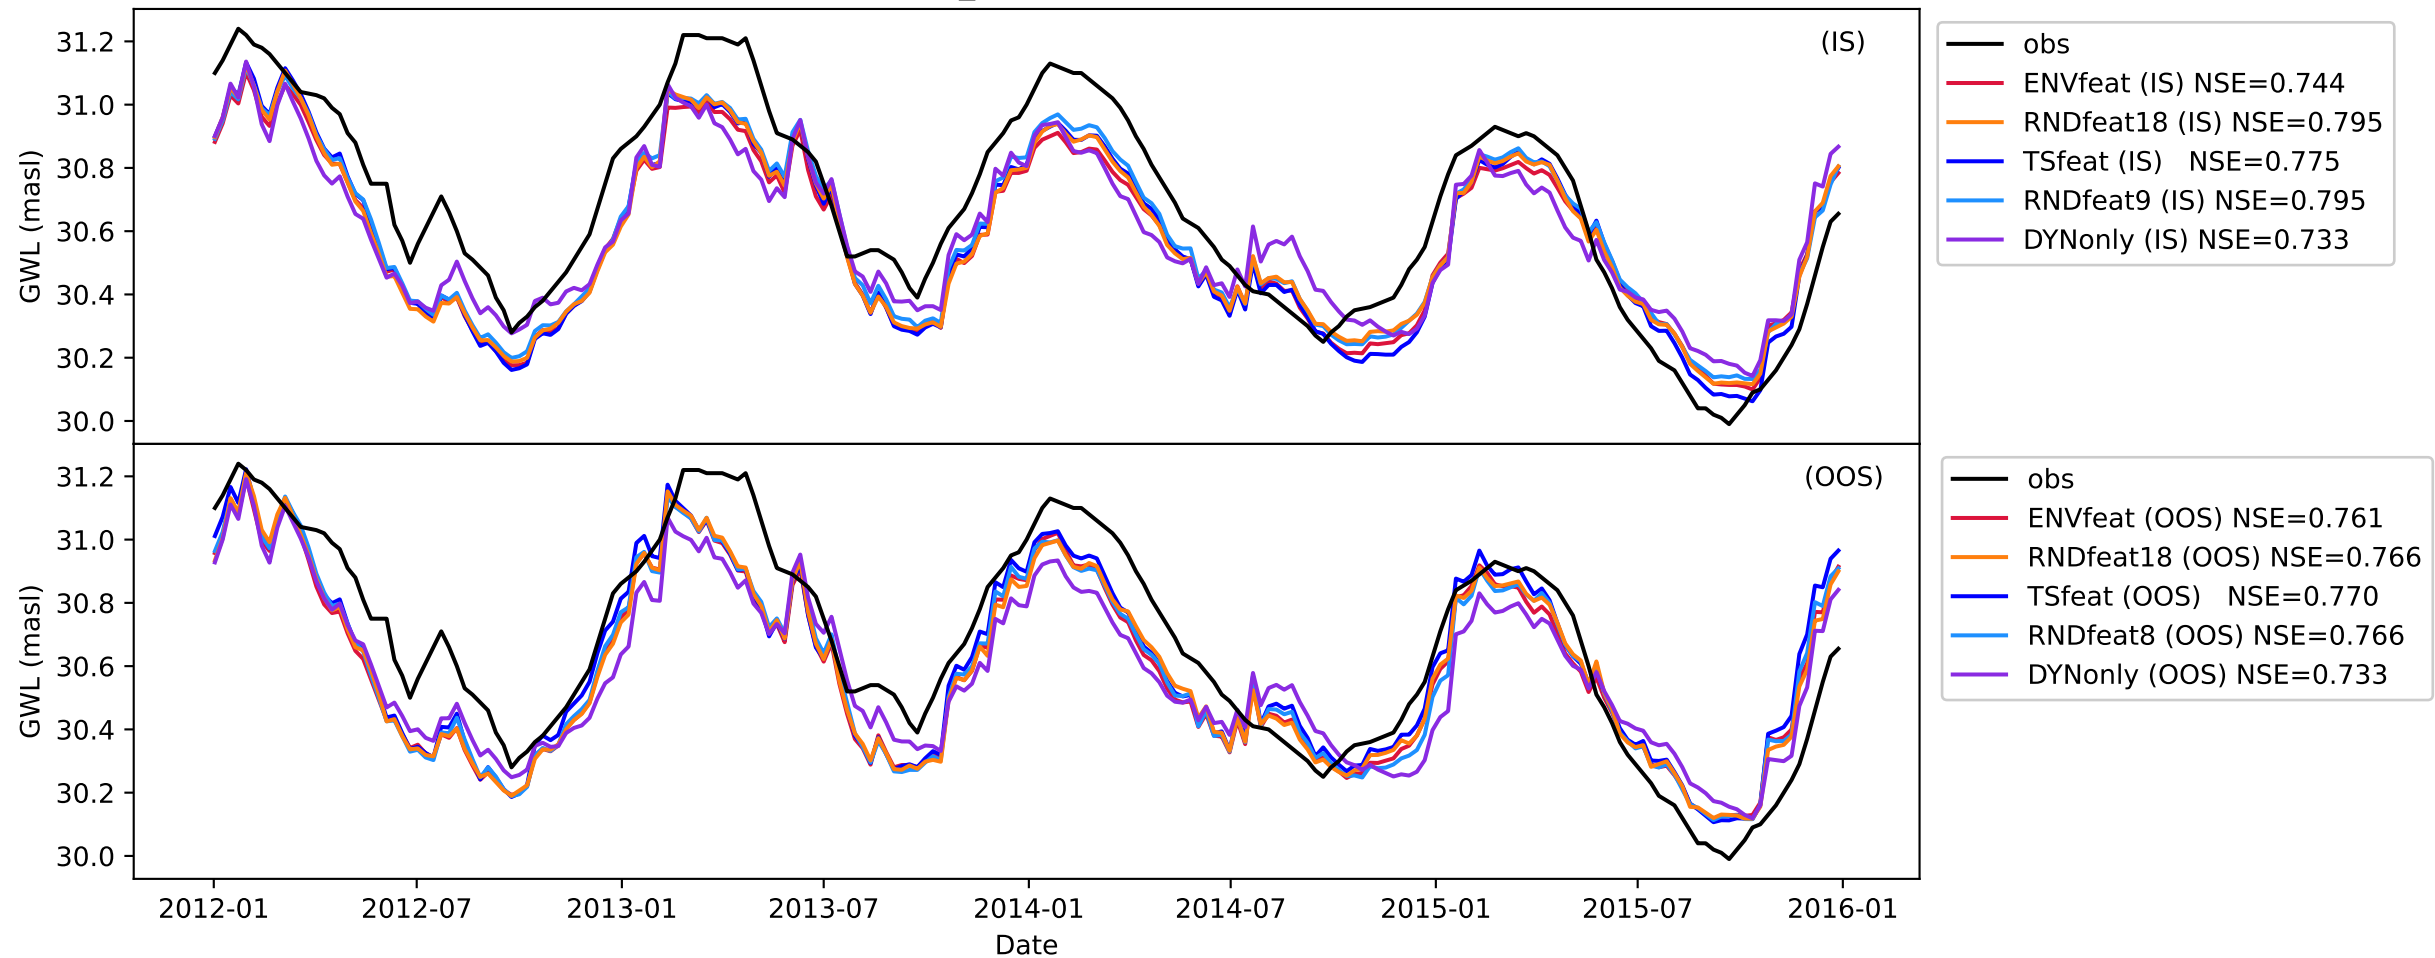

BB\_33437106

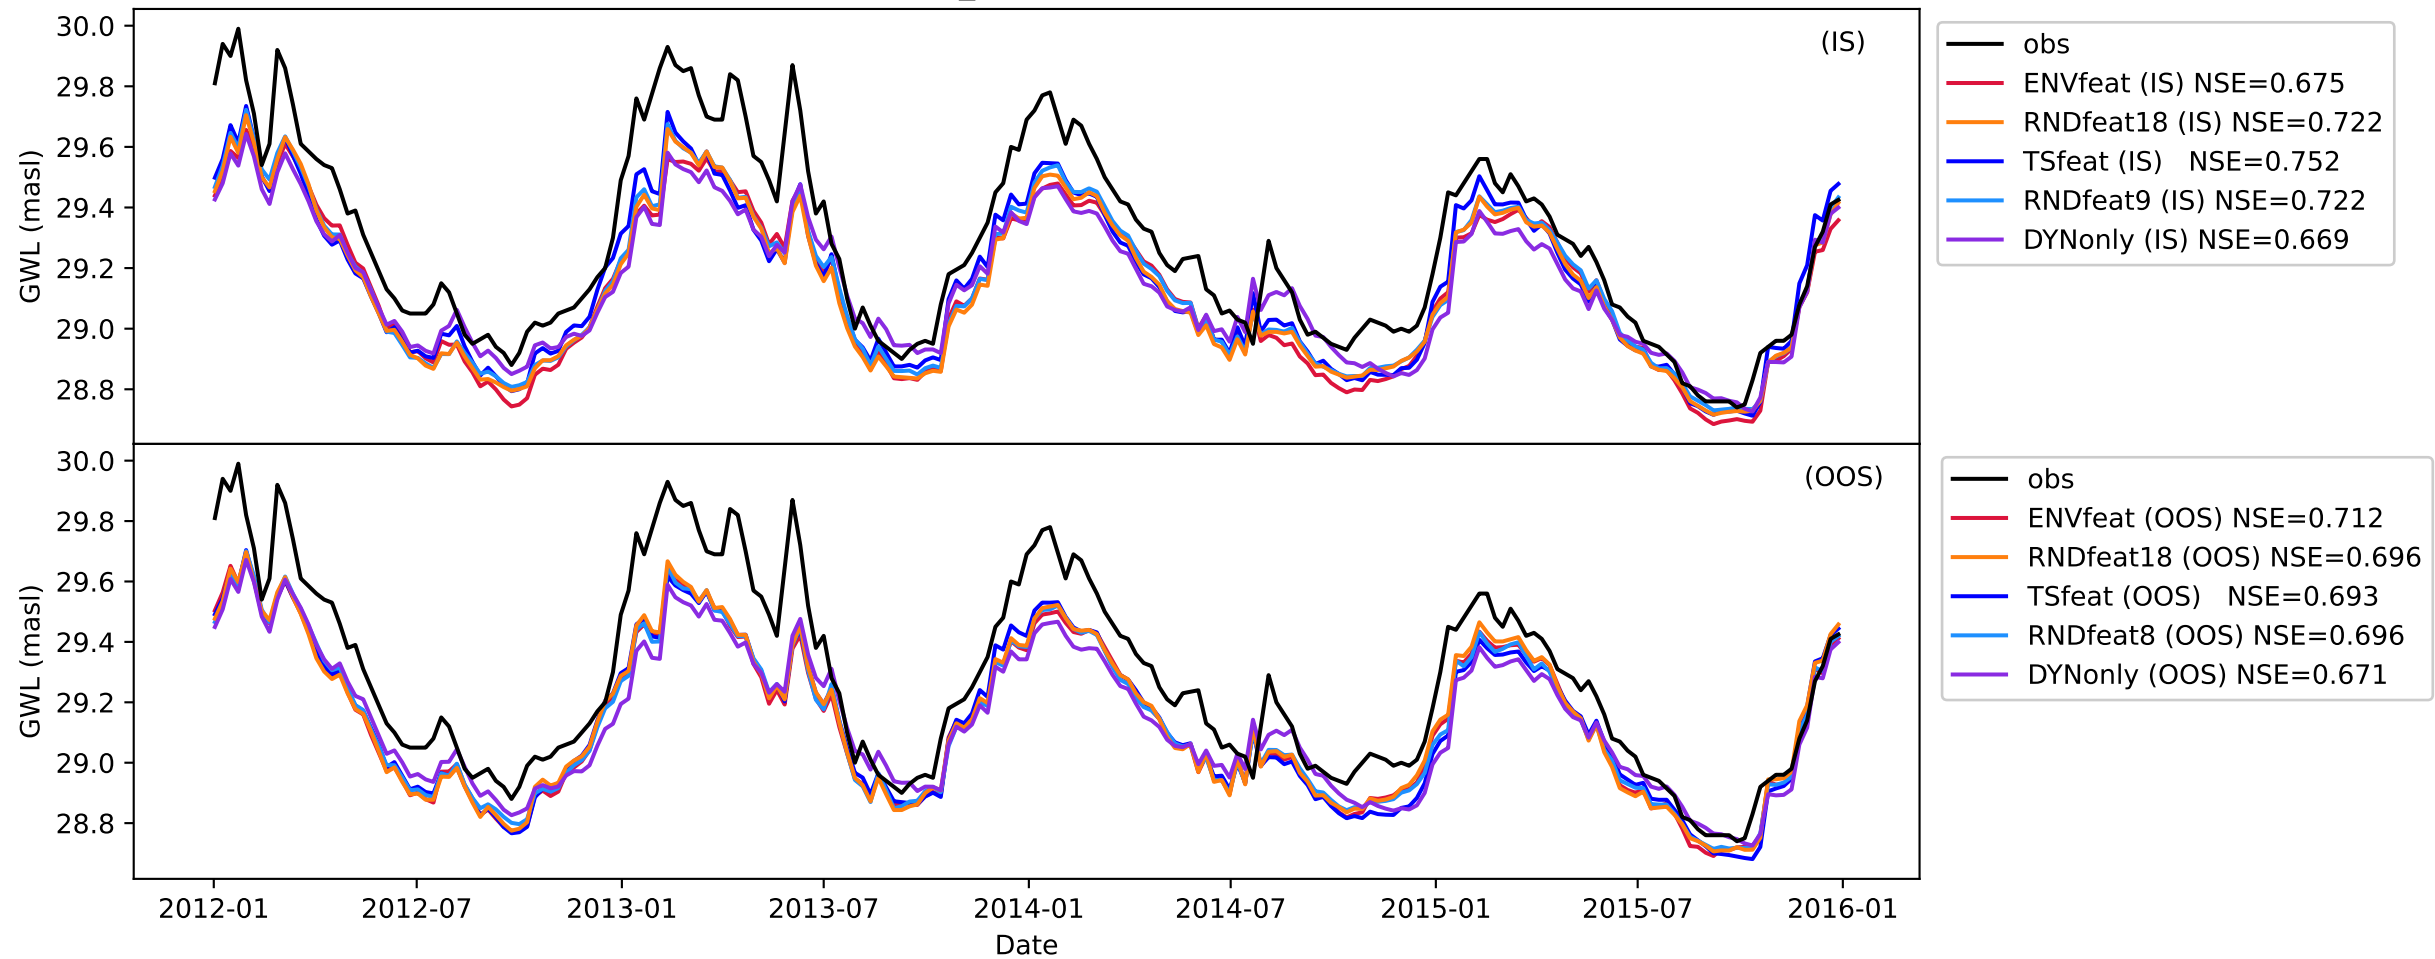

BB\_33452451

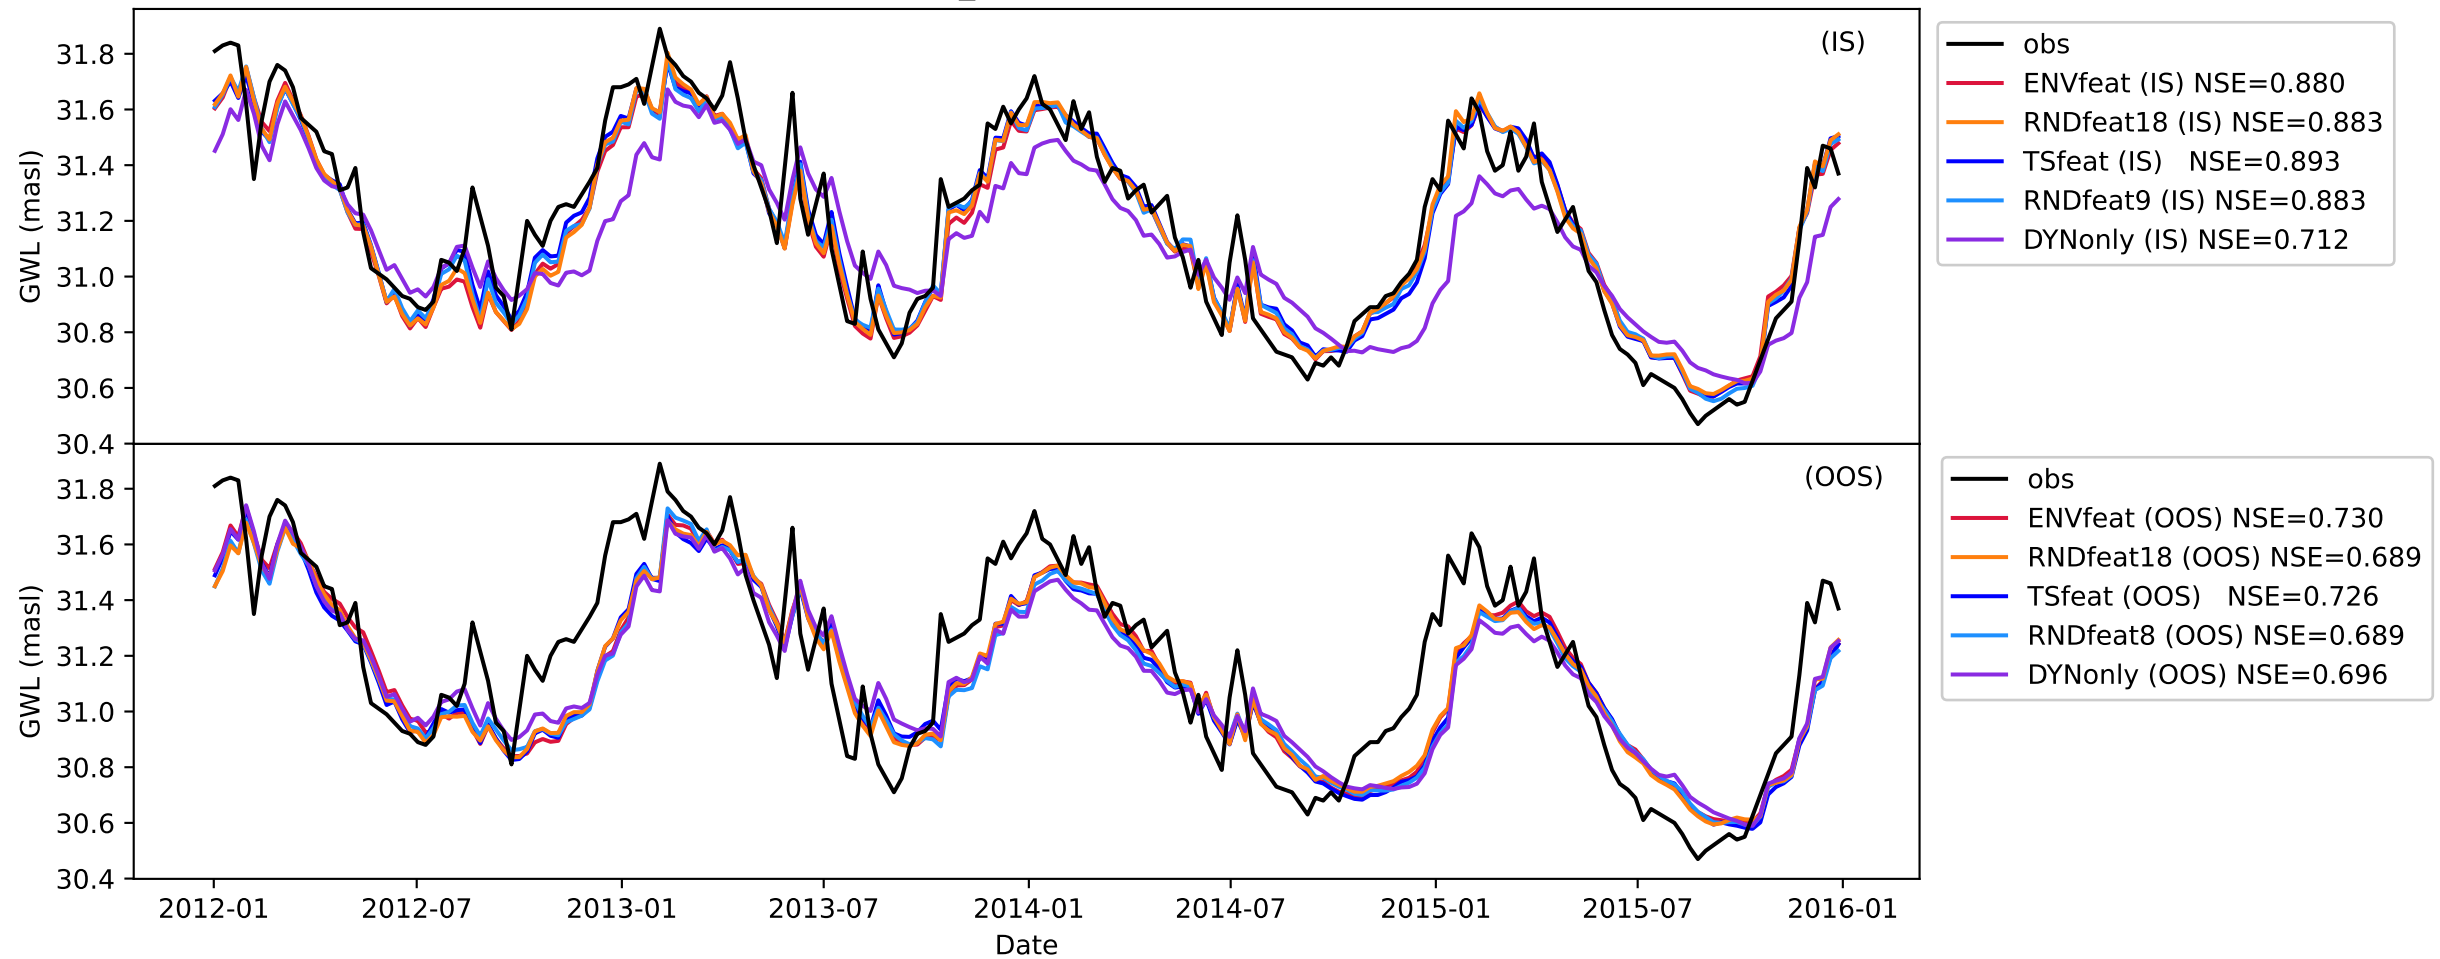

BB\_33470960

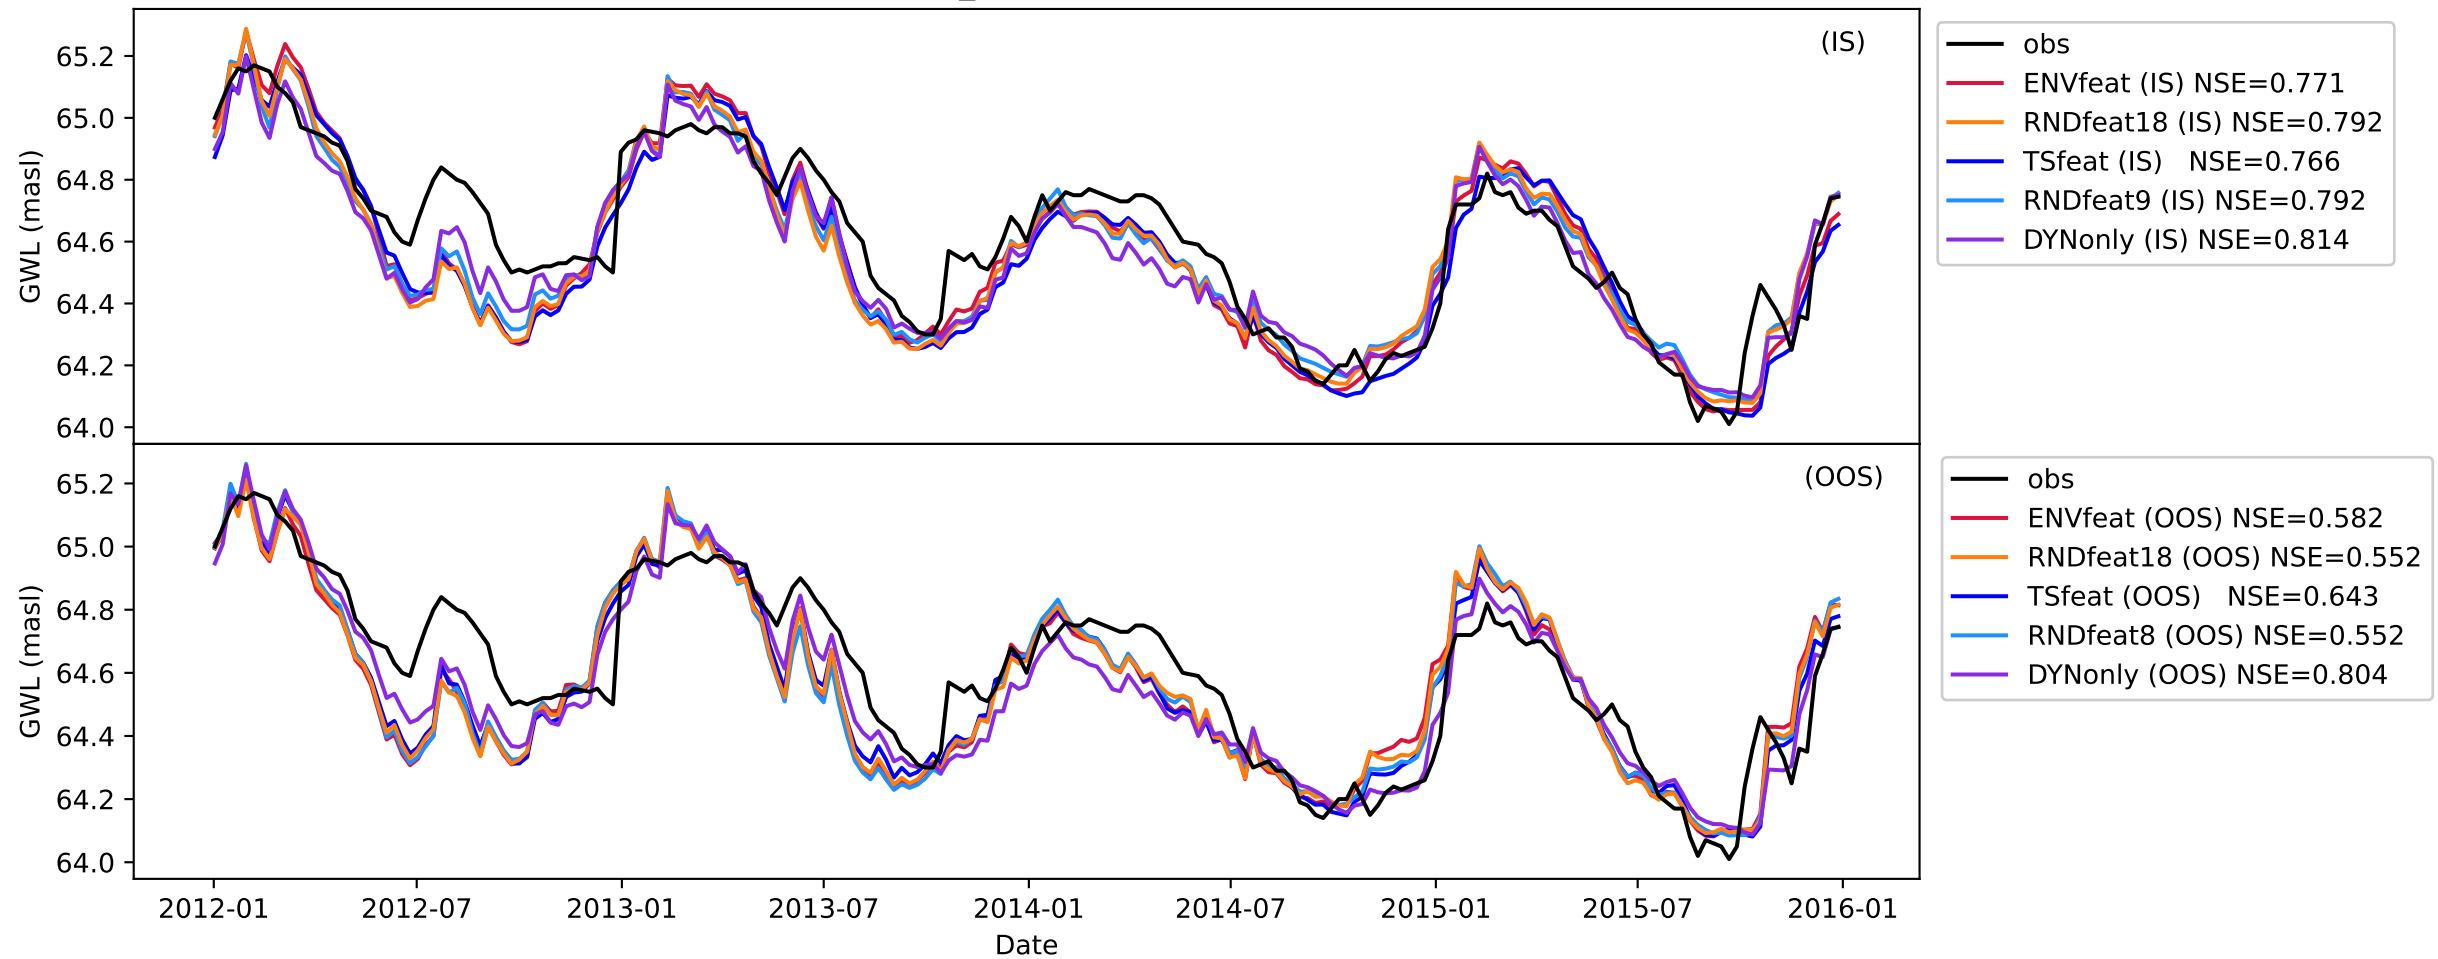

BB\_34426110

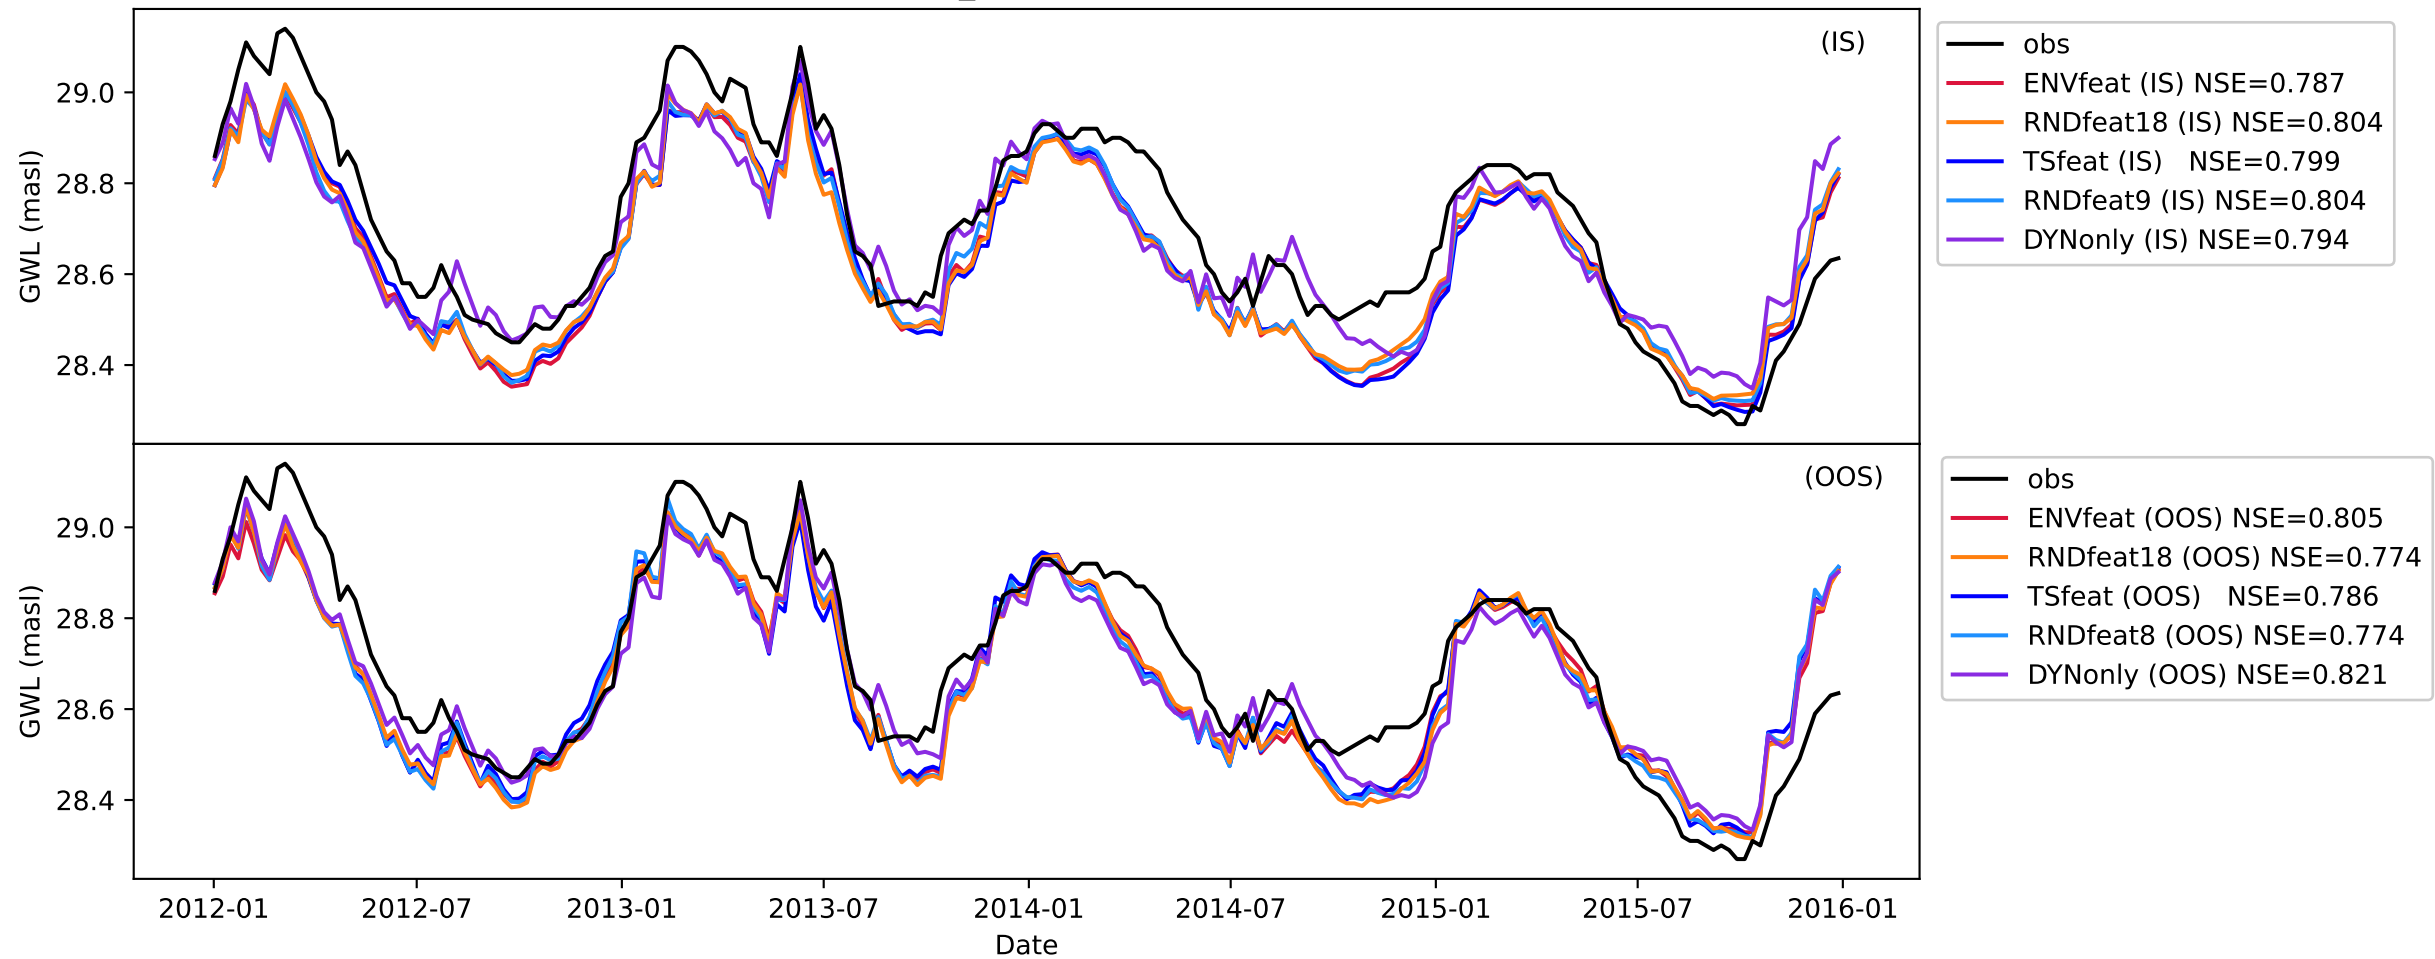

BB\_34522461

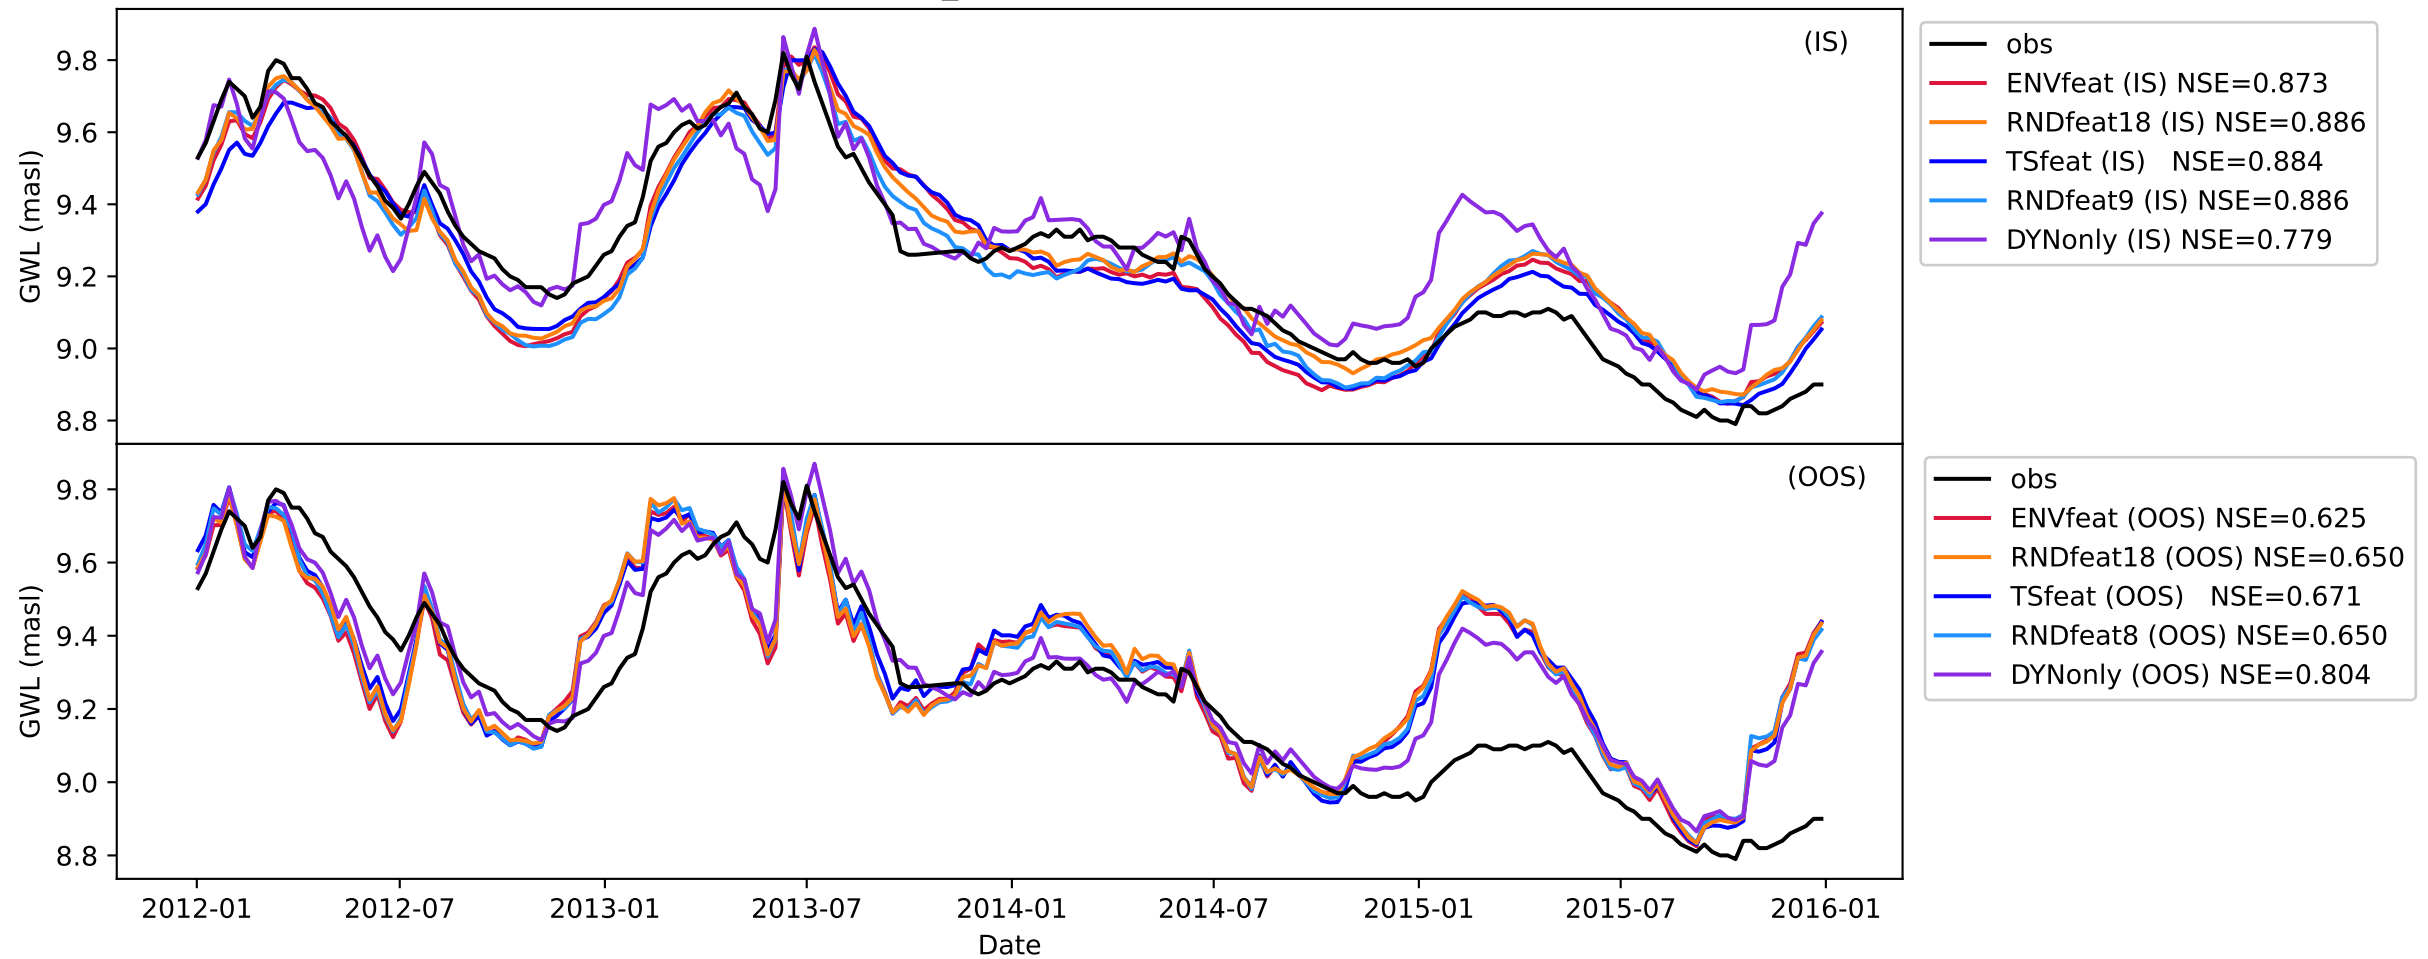

BB\_37451908

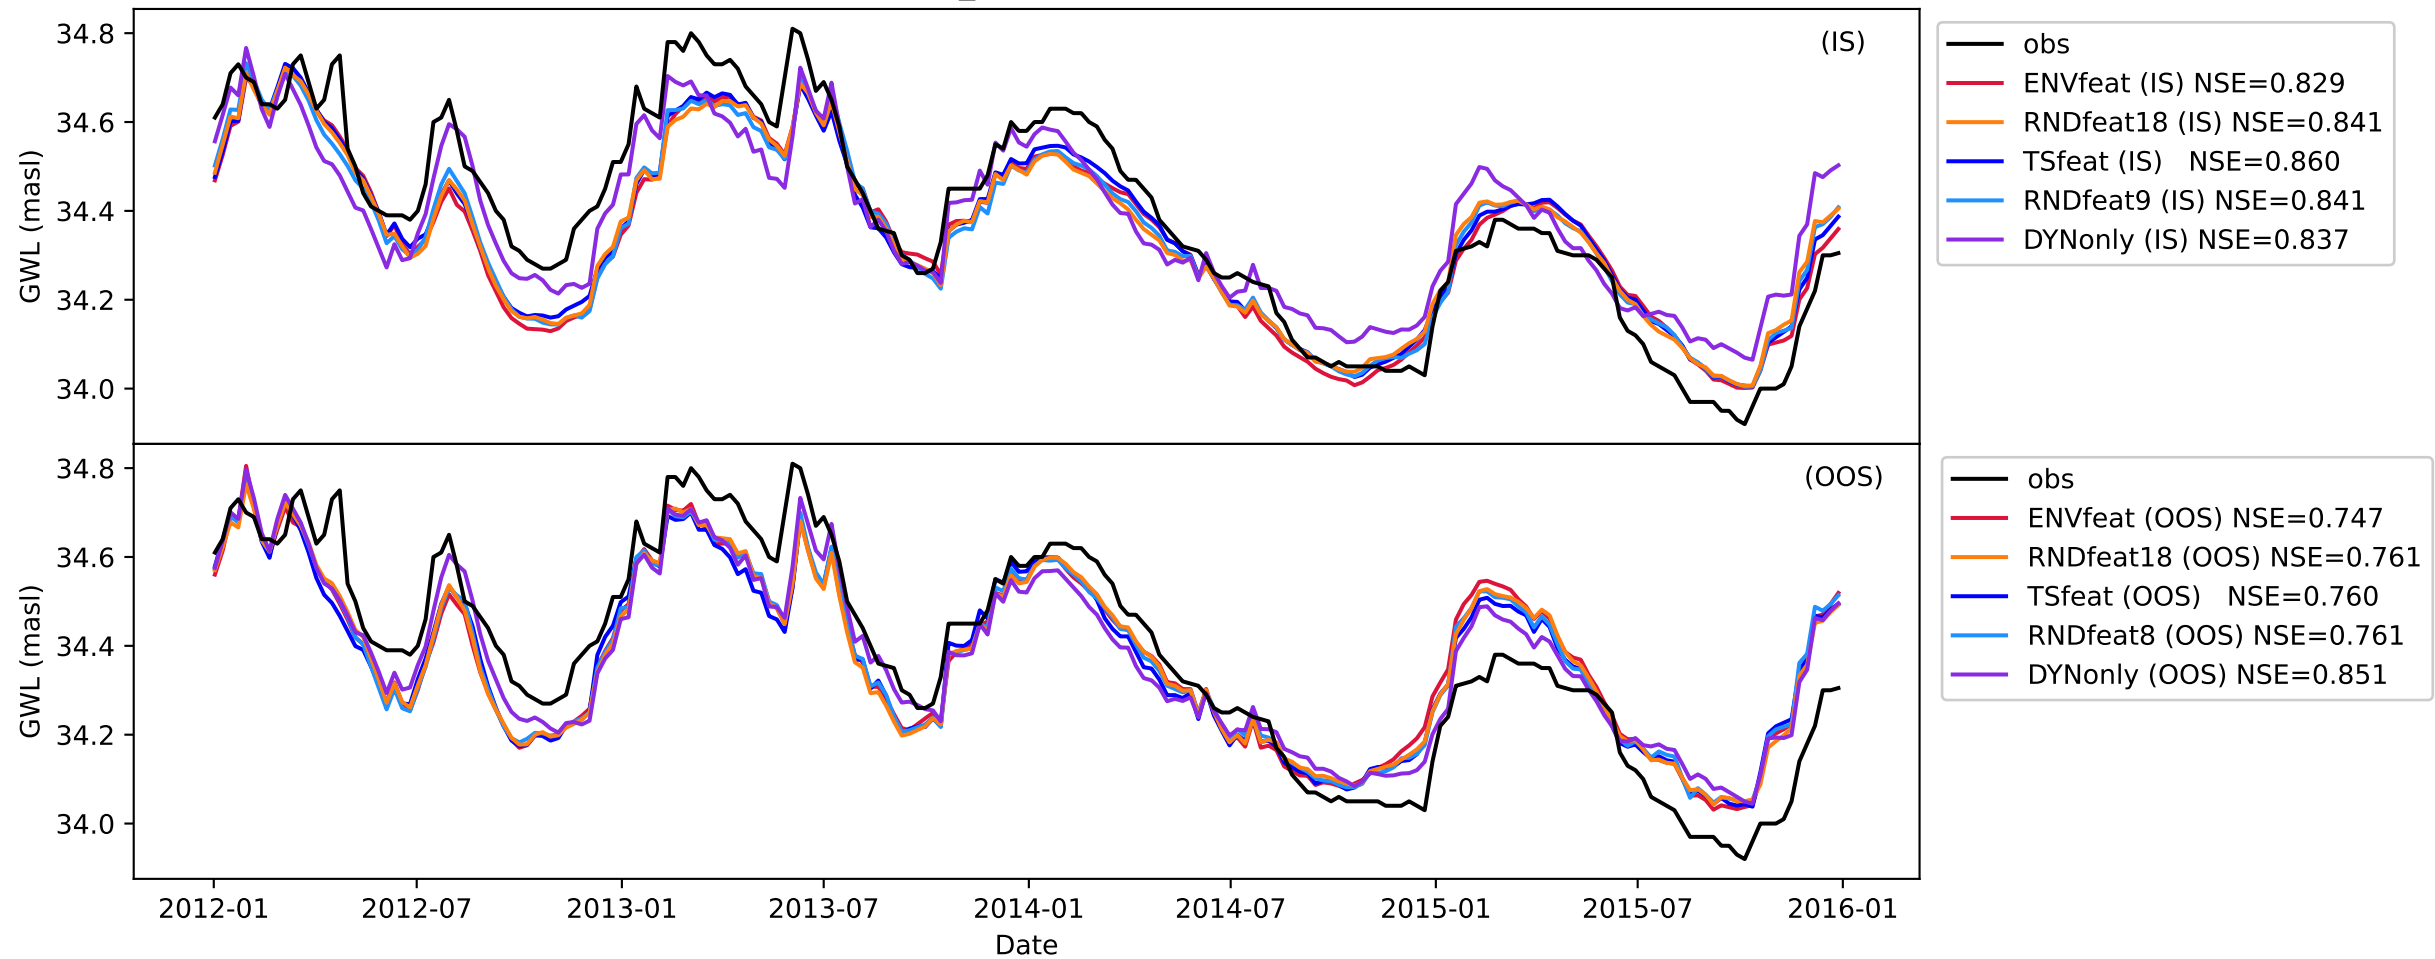



BB\_39441476

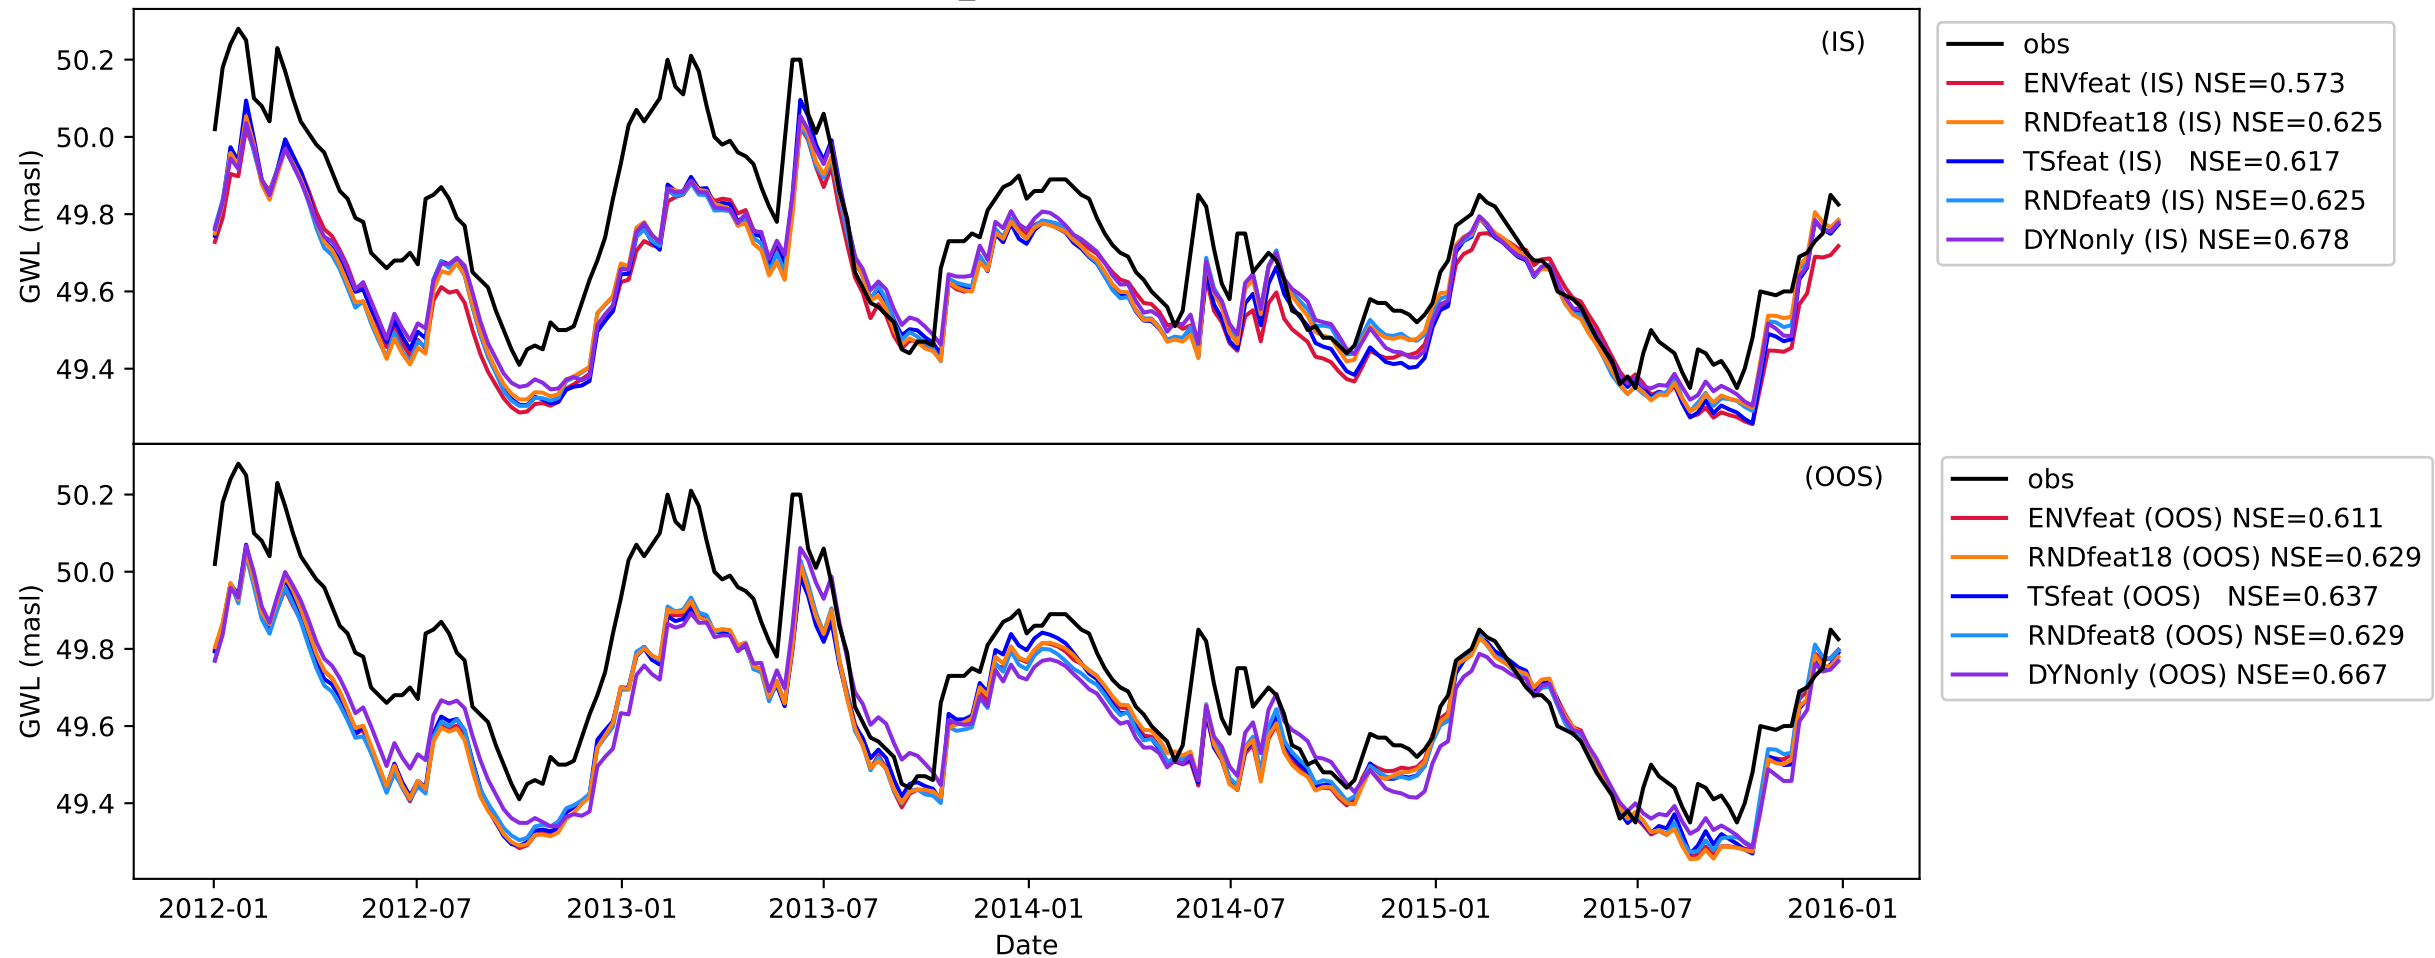

BB\_39496056

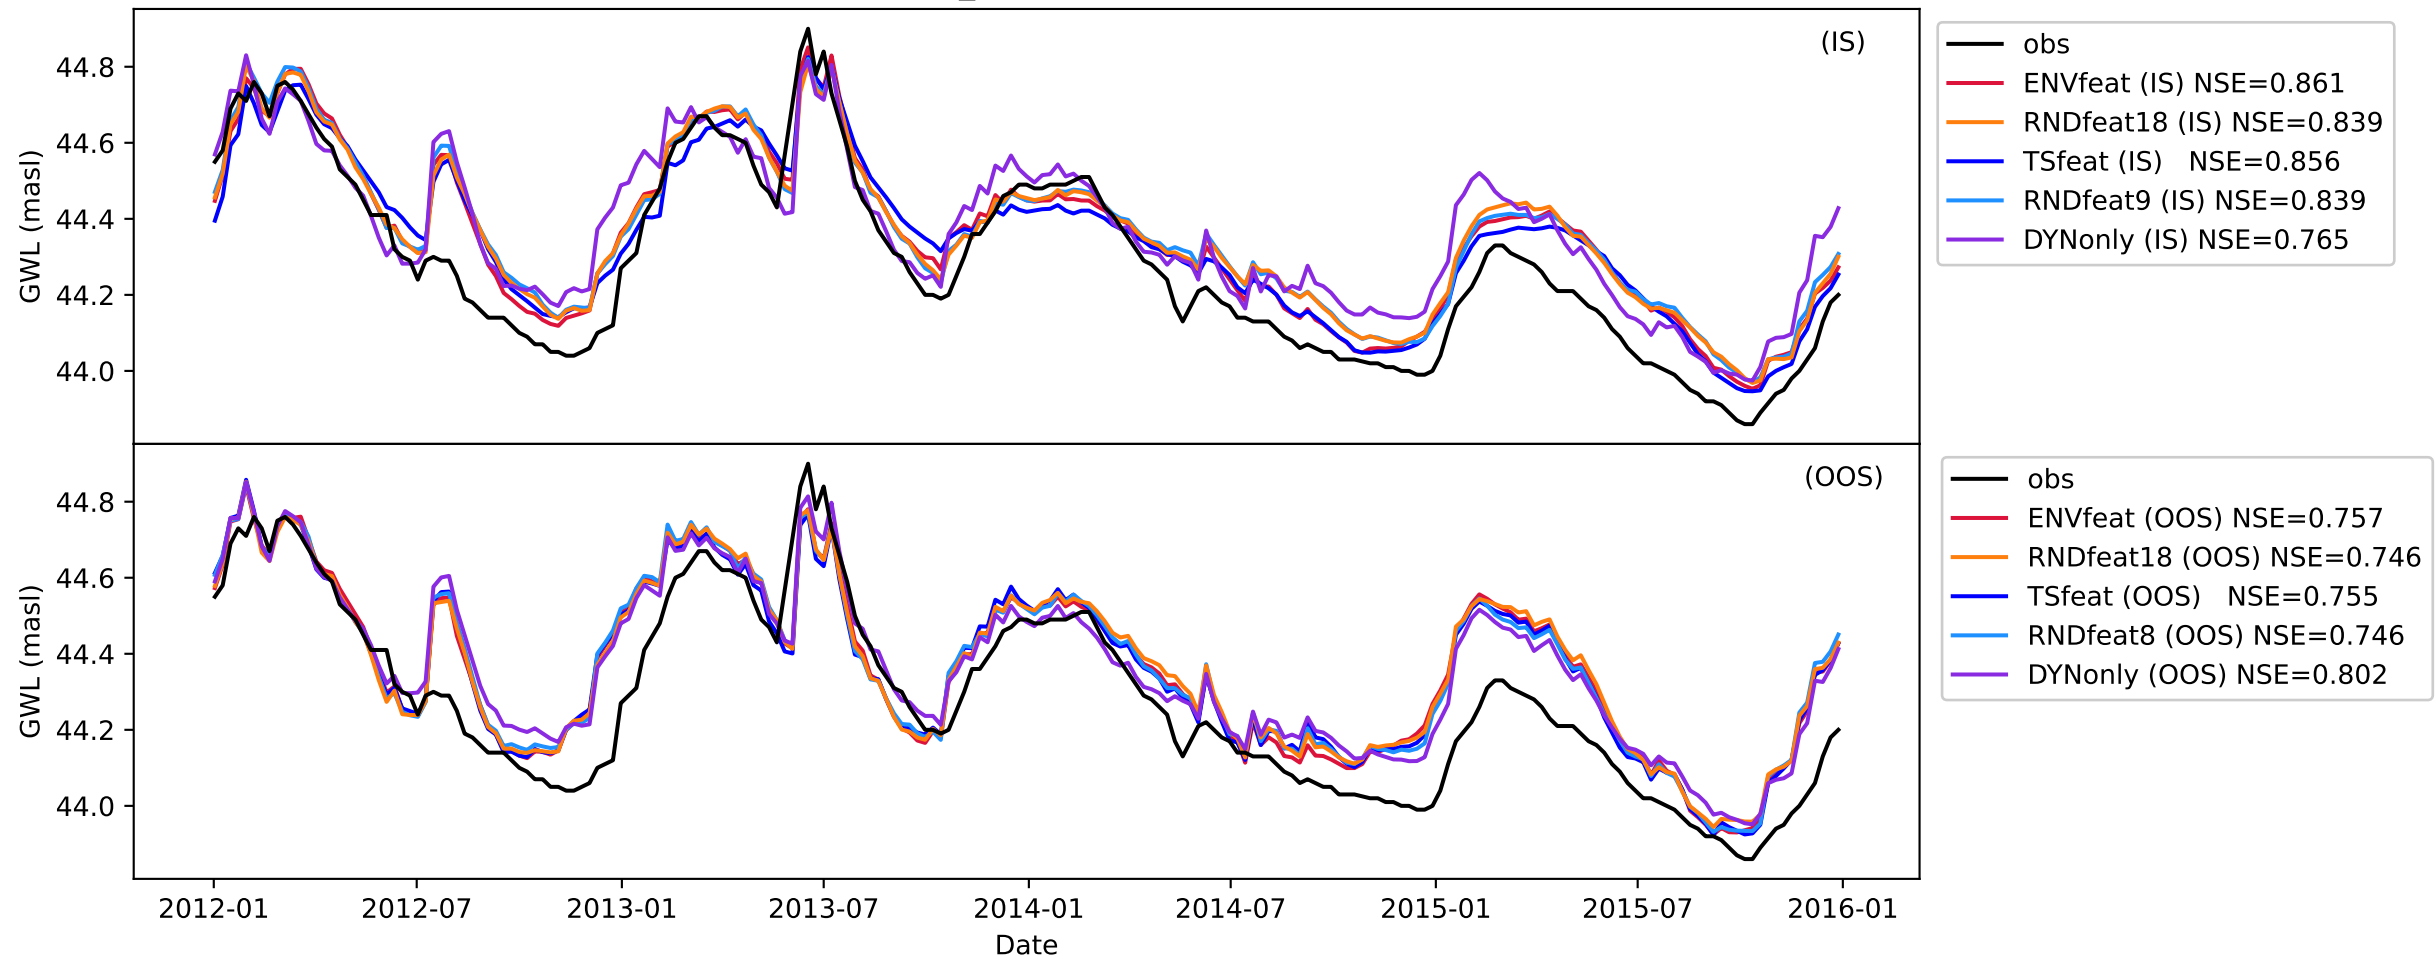

BB\_40500136

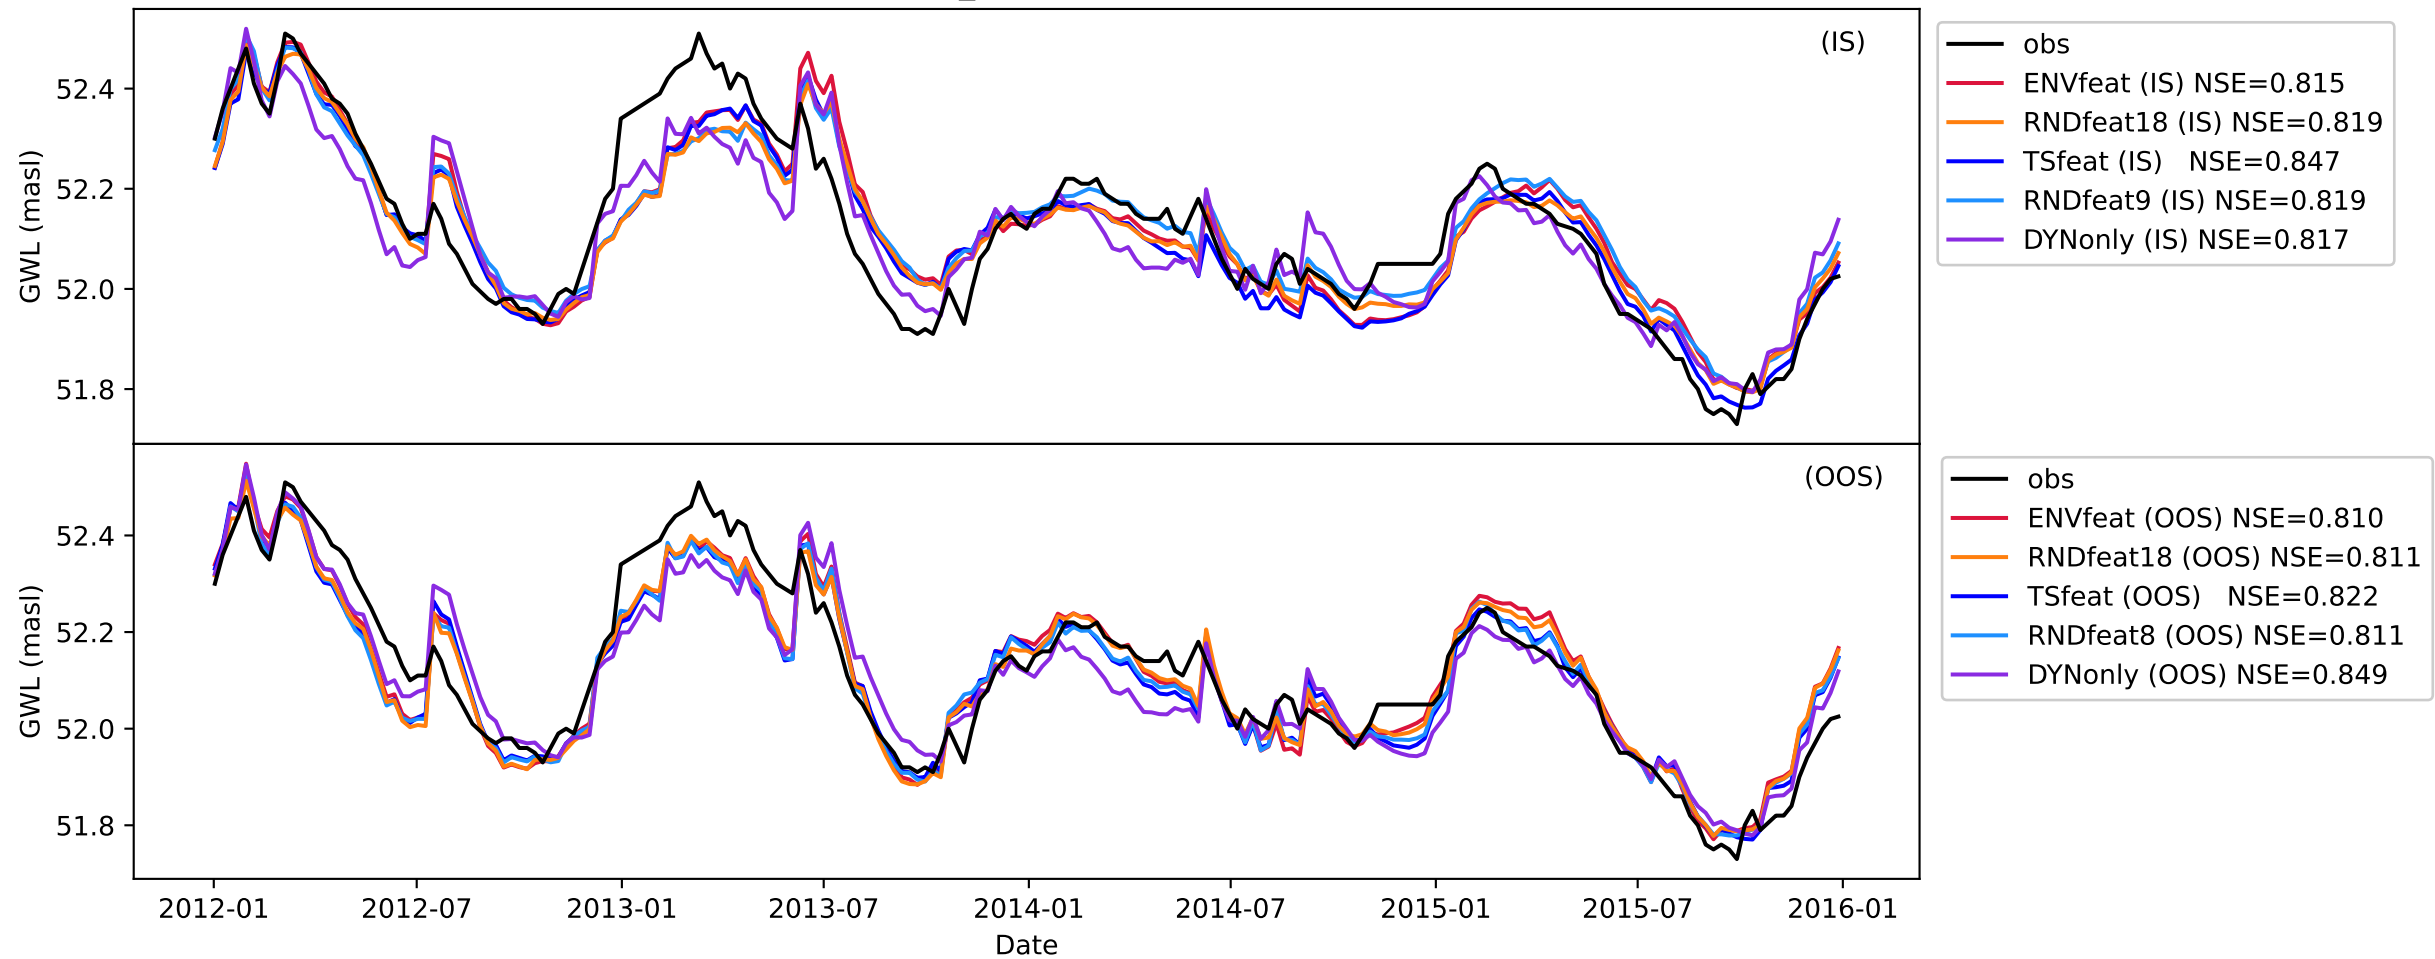

BB\_42458092

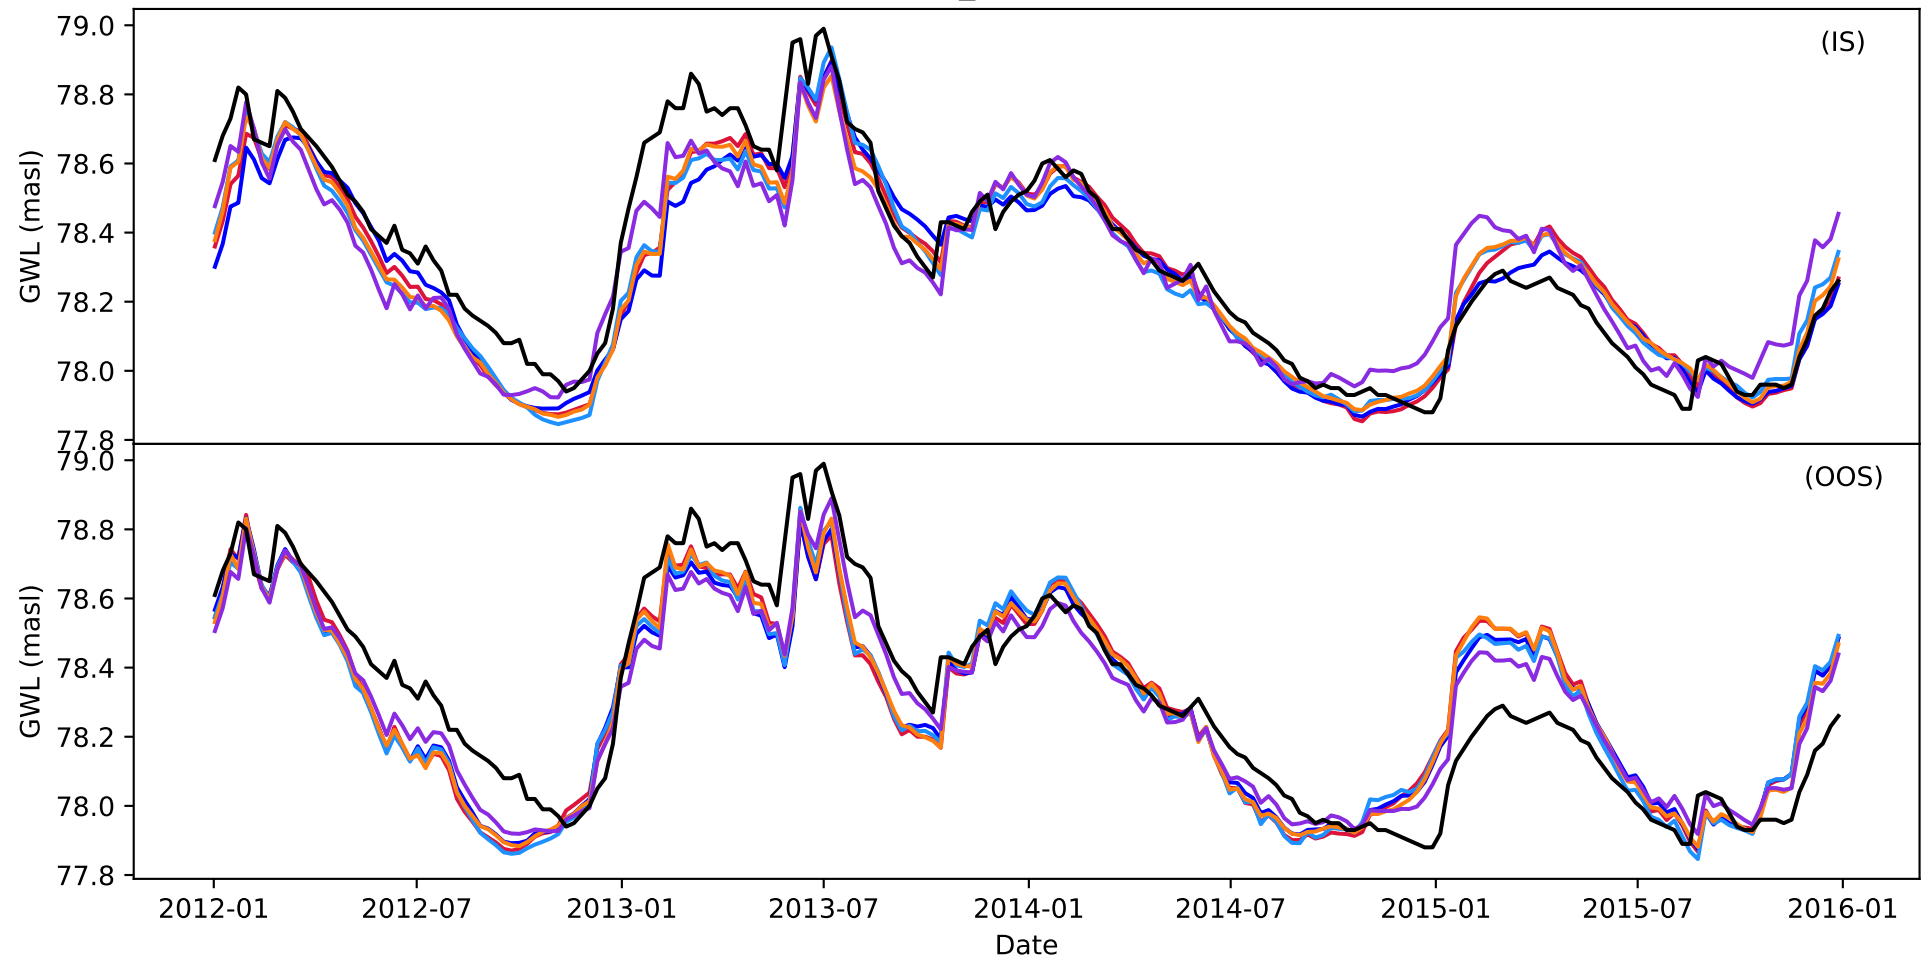

- obs
- ENVfeat (IS) NSE=0.868
- RNDfeat18 (IS) NSE=0.857
- TSfeat (IS) NSE=0.850
- RNDfeat9 (IS) NSE=0.857
- DYNOnly (IS) NSE=0.845

- obs
- ENVfeat (OOS) NSE=0.754
- RNDfeat18 (OOS) NSE=0.781
- TSfeat (OOS) NSE=0.798
- RNDfeat8 (OOS) NSE=0.781
- DYNOnly (OOS) NSE=0.867

BW\_15-568-2

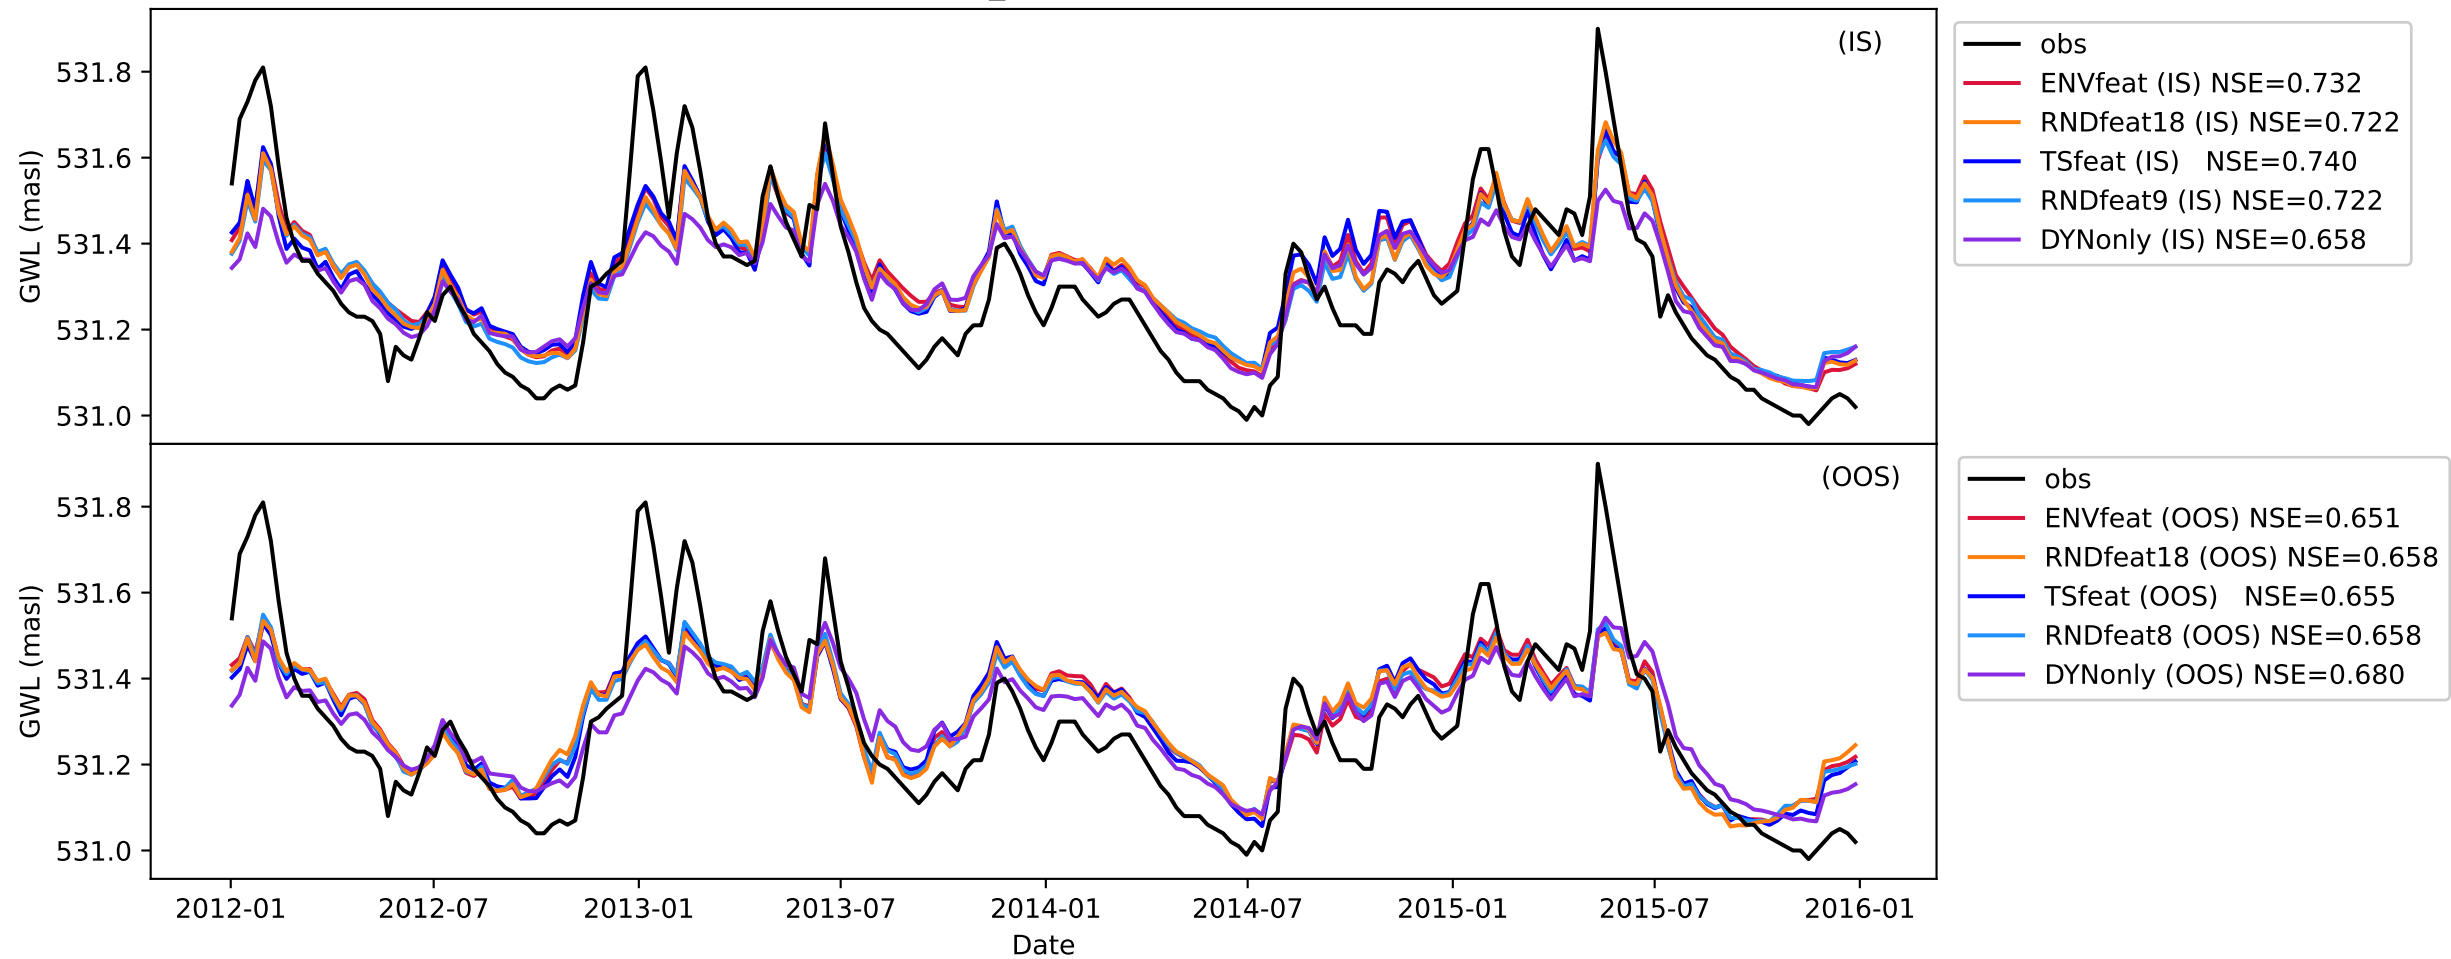

BW\_100-813-7

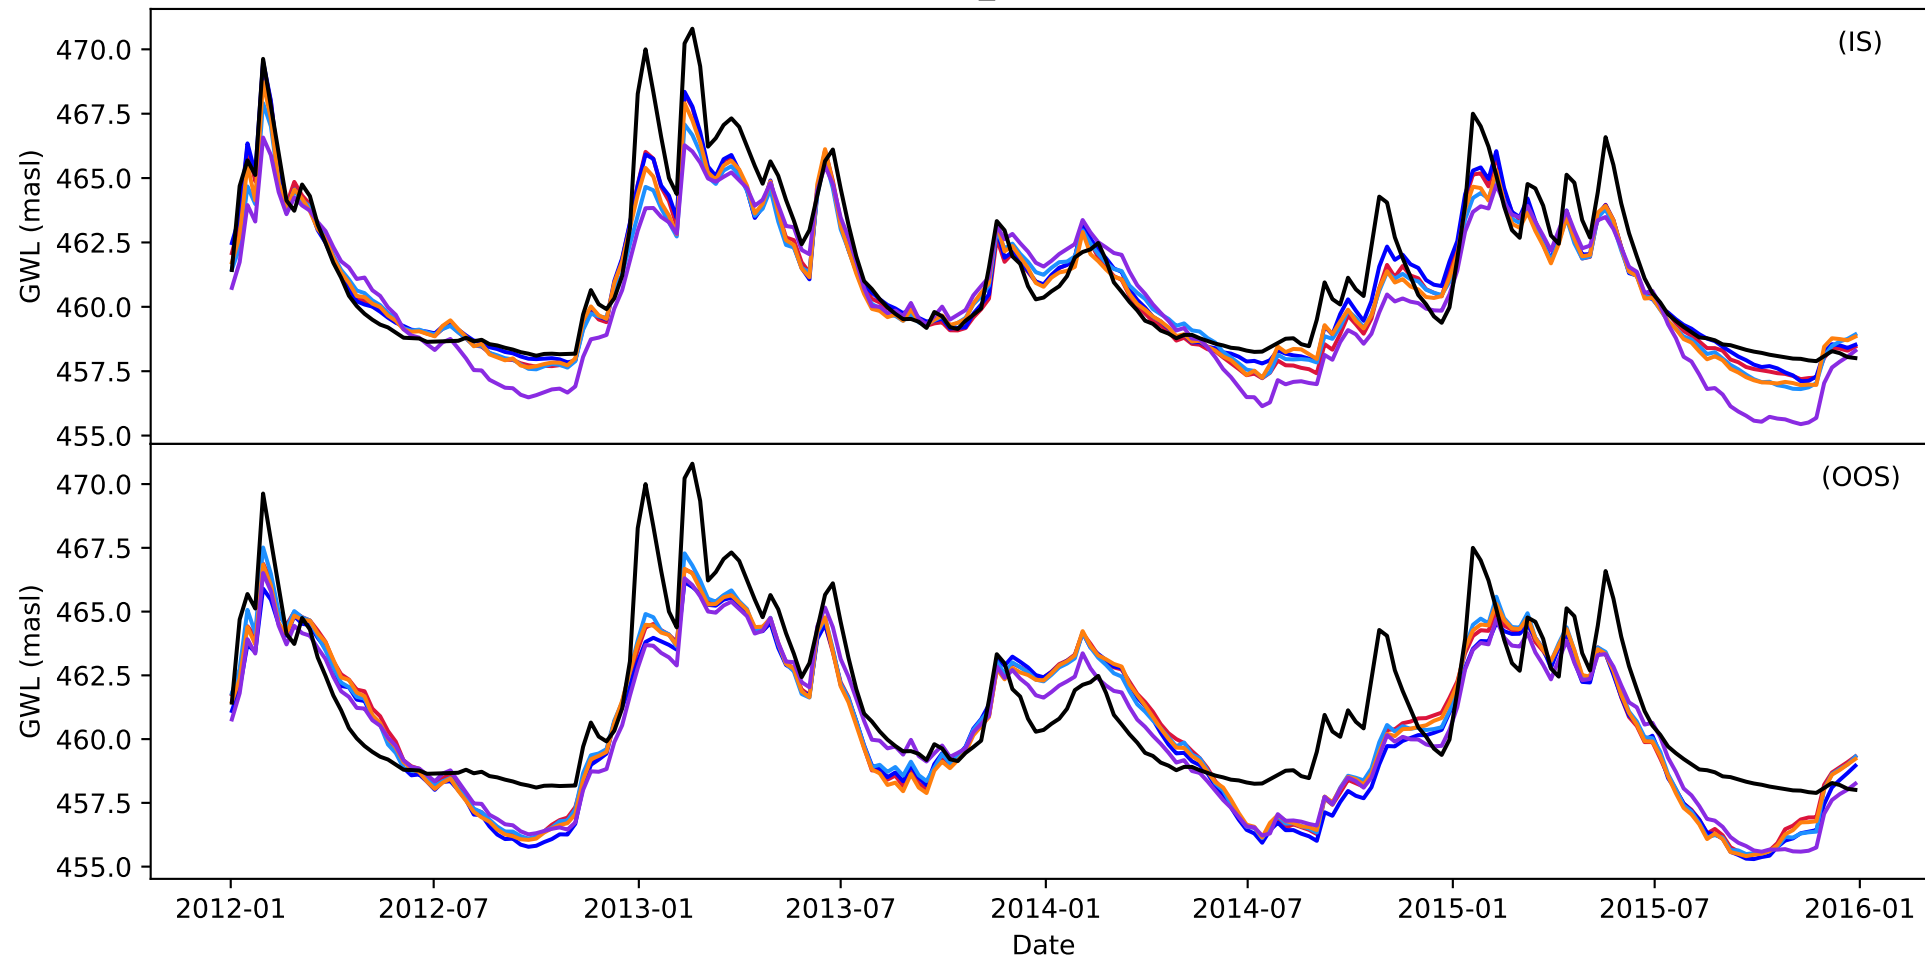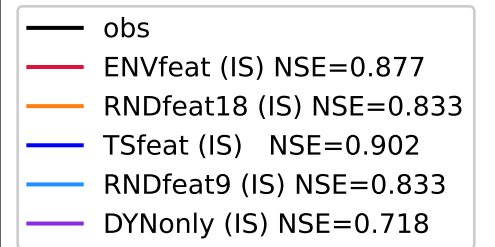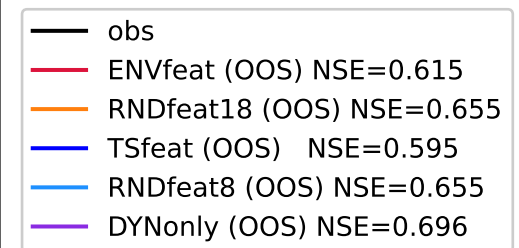

BW\_103-763-0

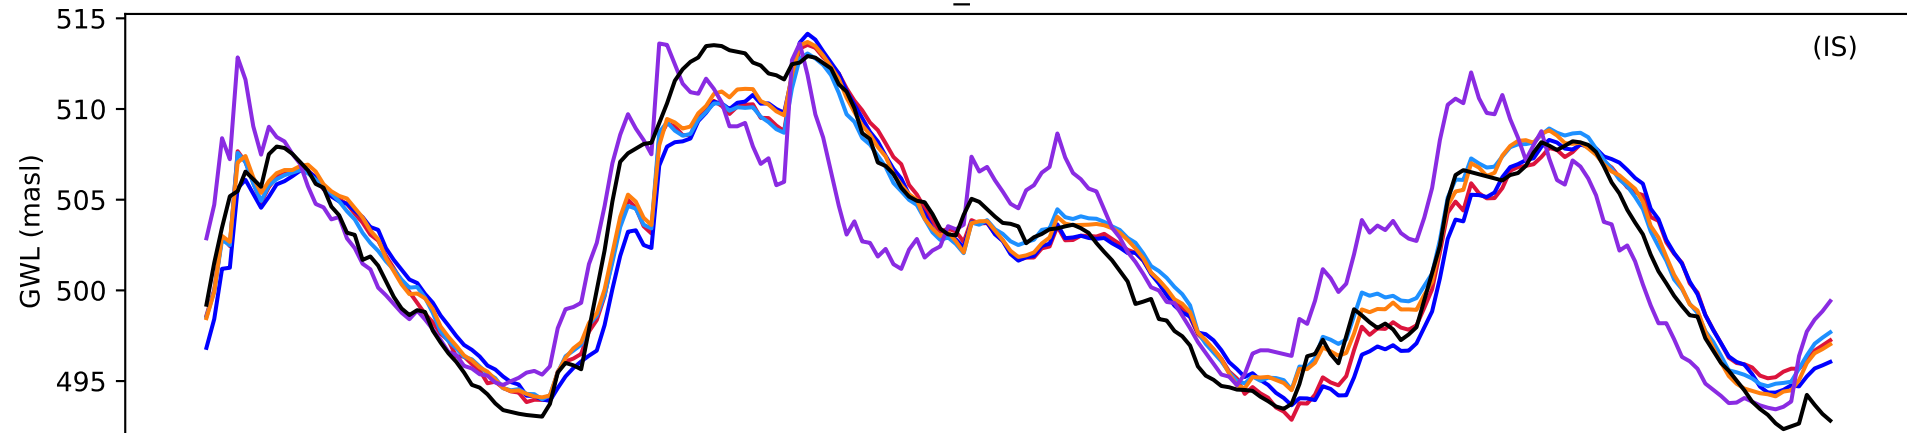

- obs
- ENVfeat (IS) NSE=0.934
- RNDfeat18 (IS) NSE=0.930
- TSfeat (IS) NSE=0.916
- RNDfeat9 (IS) NSE=0.930
- DYNOnly (IS) NSE=0.804

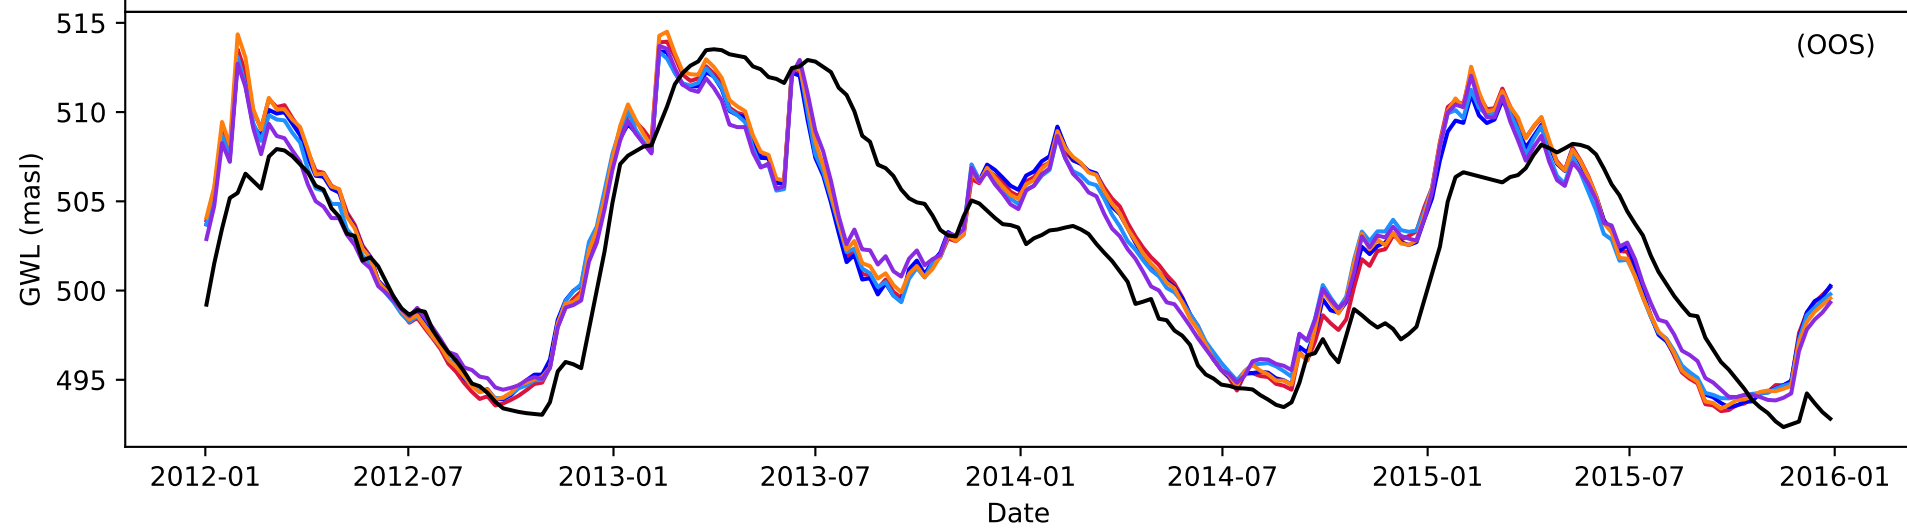

- obs
- ENVfeat (OOS) NSE=0.767
- RNDfeat18 (OOS) NSE=0.762
- TSfeat (OOS) NSE=0.764
- RNDfeat8 (OOS) NSE=0.762
- DYNOnly (OOS) NSE=0.807

BW\_107-666-2

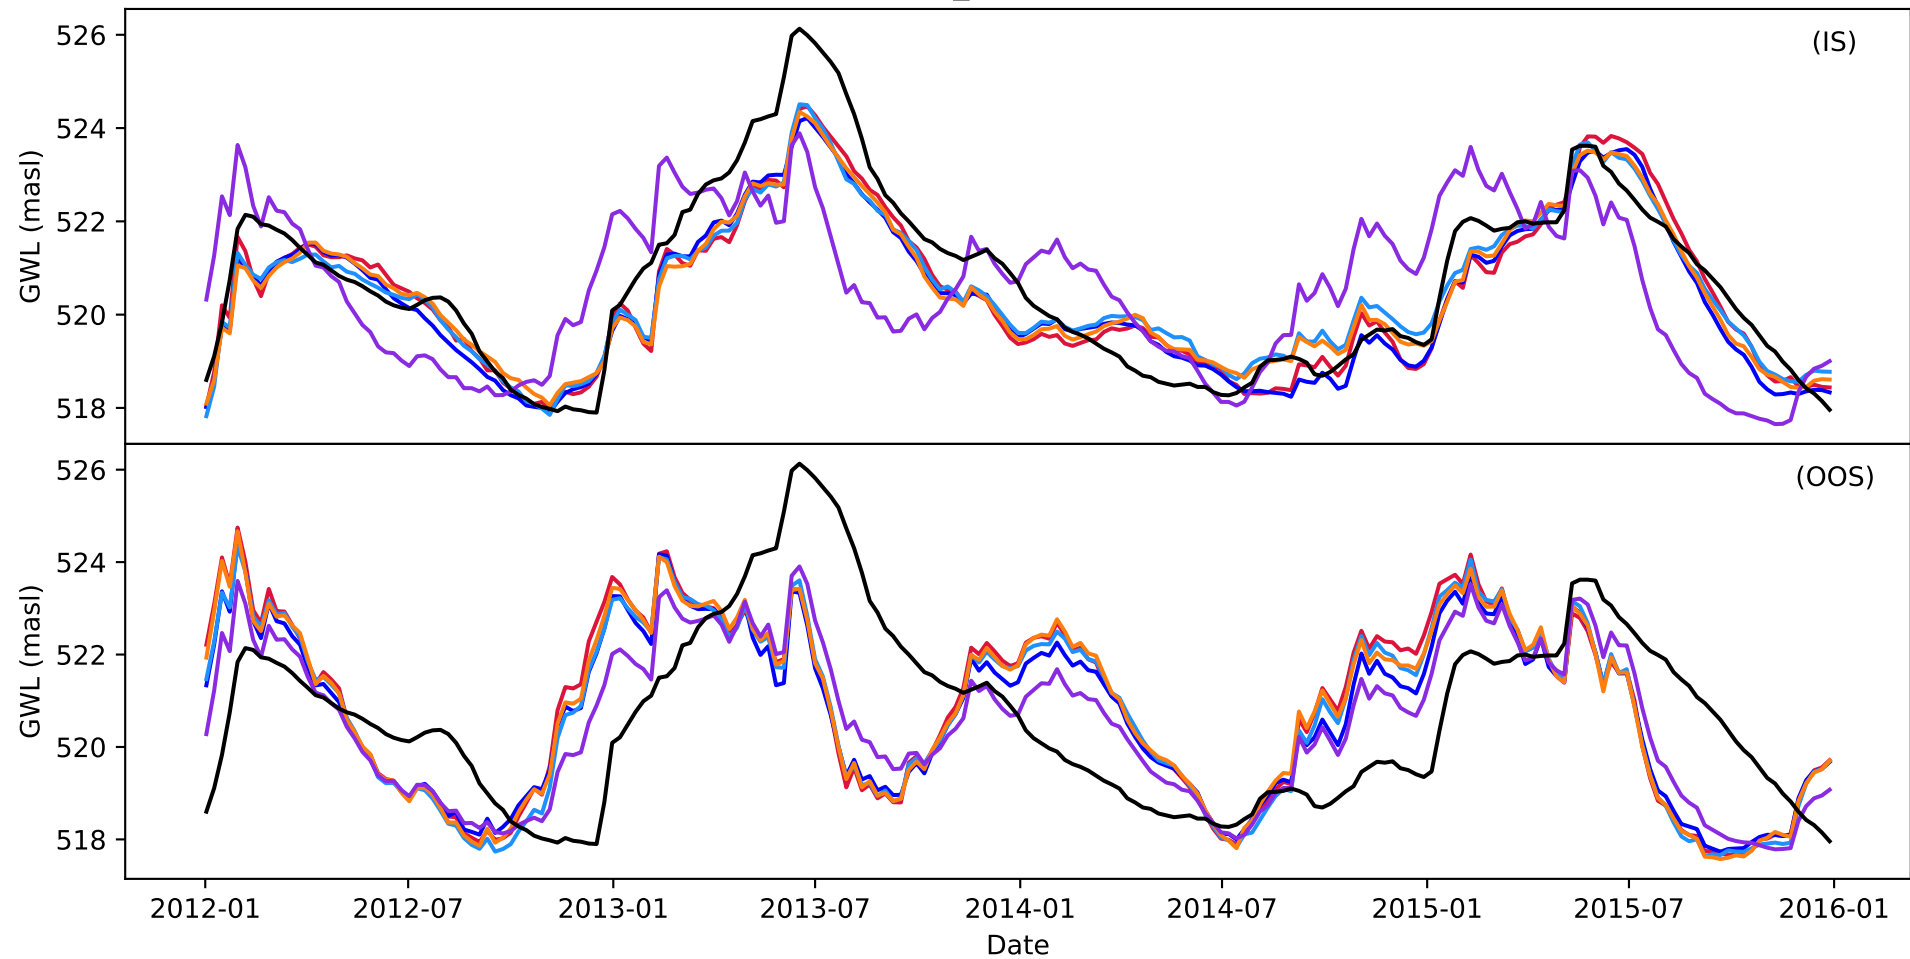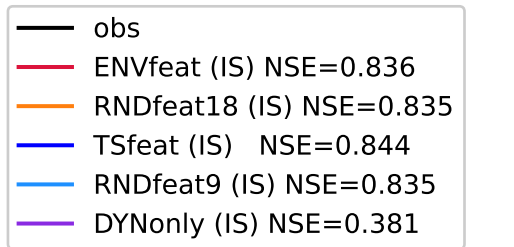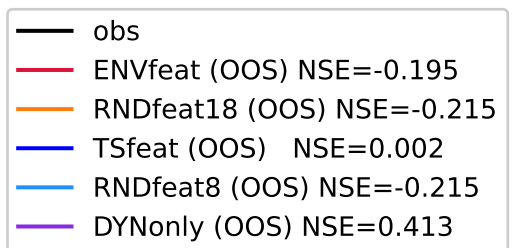



BW\_110-619-8

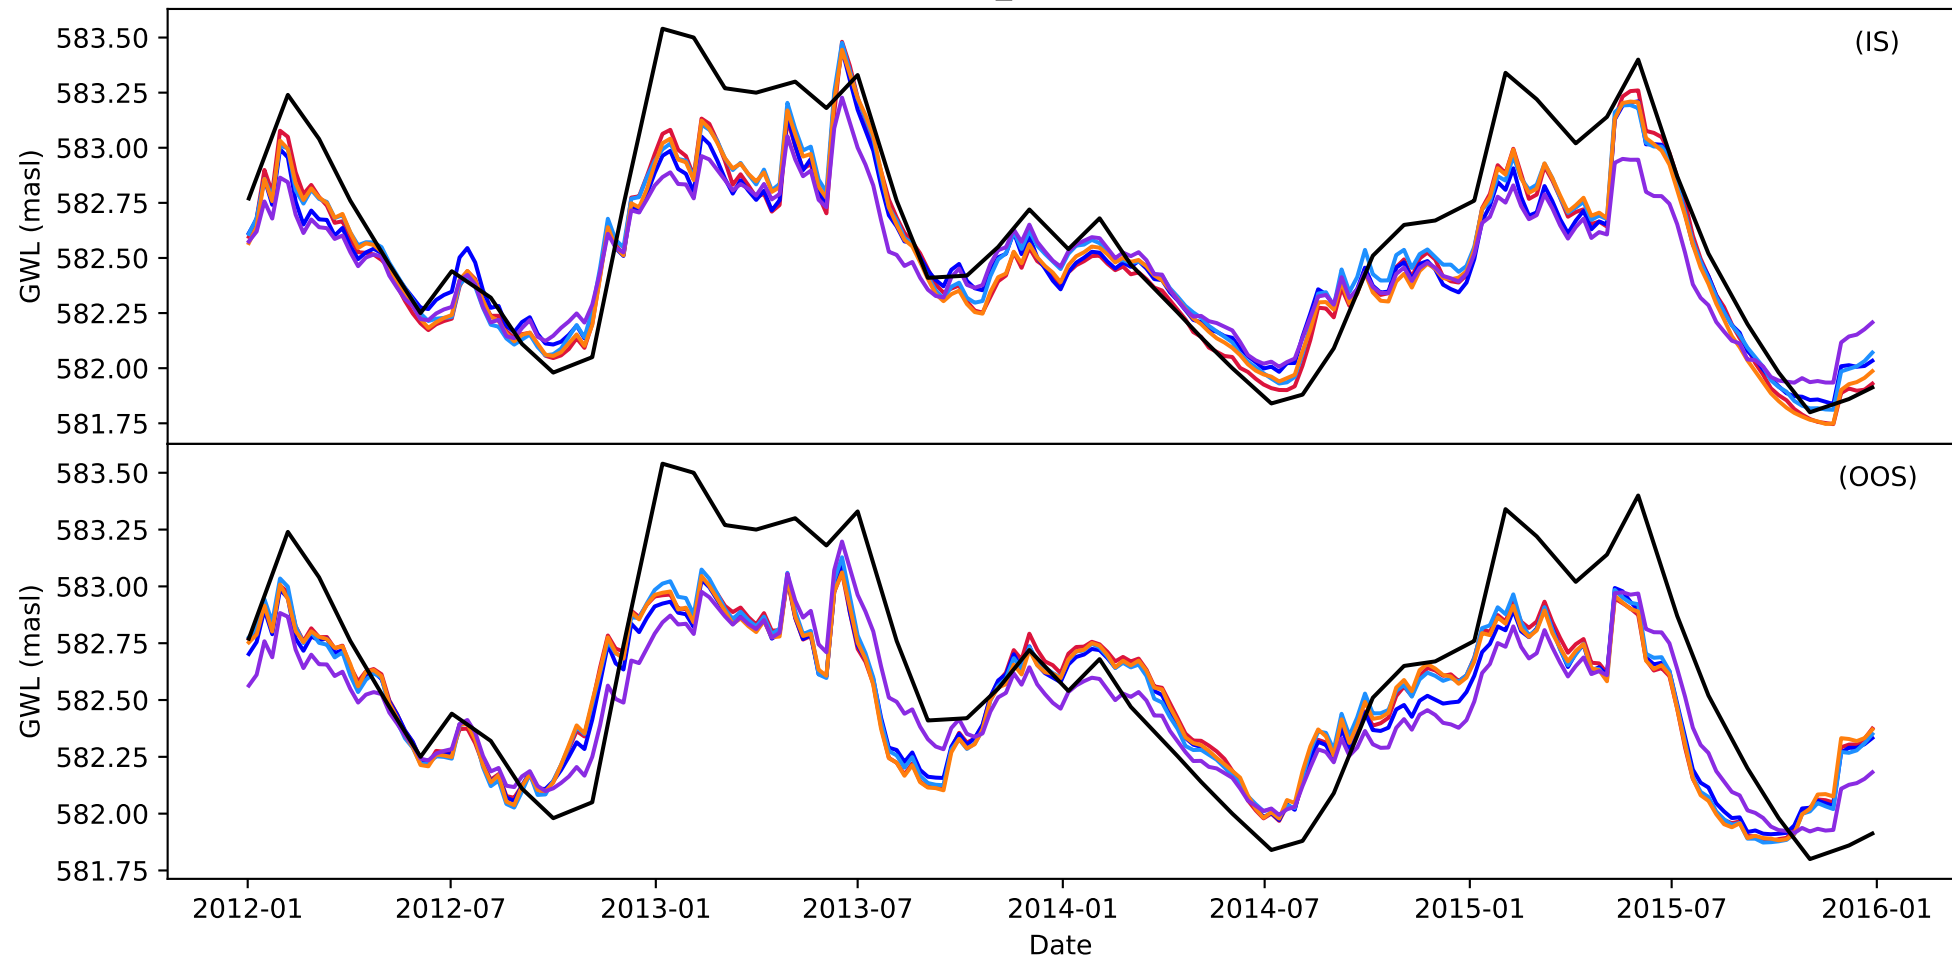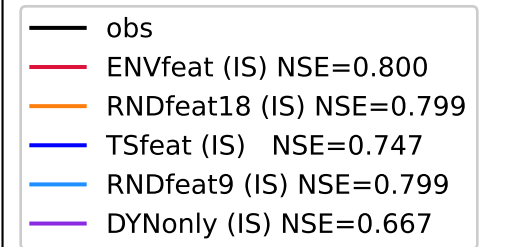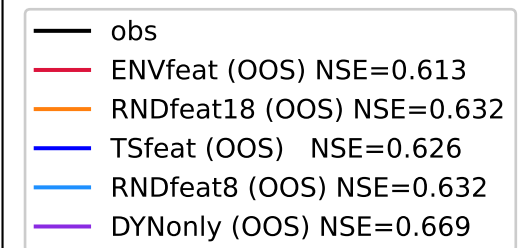

BW\_112-211-1

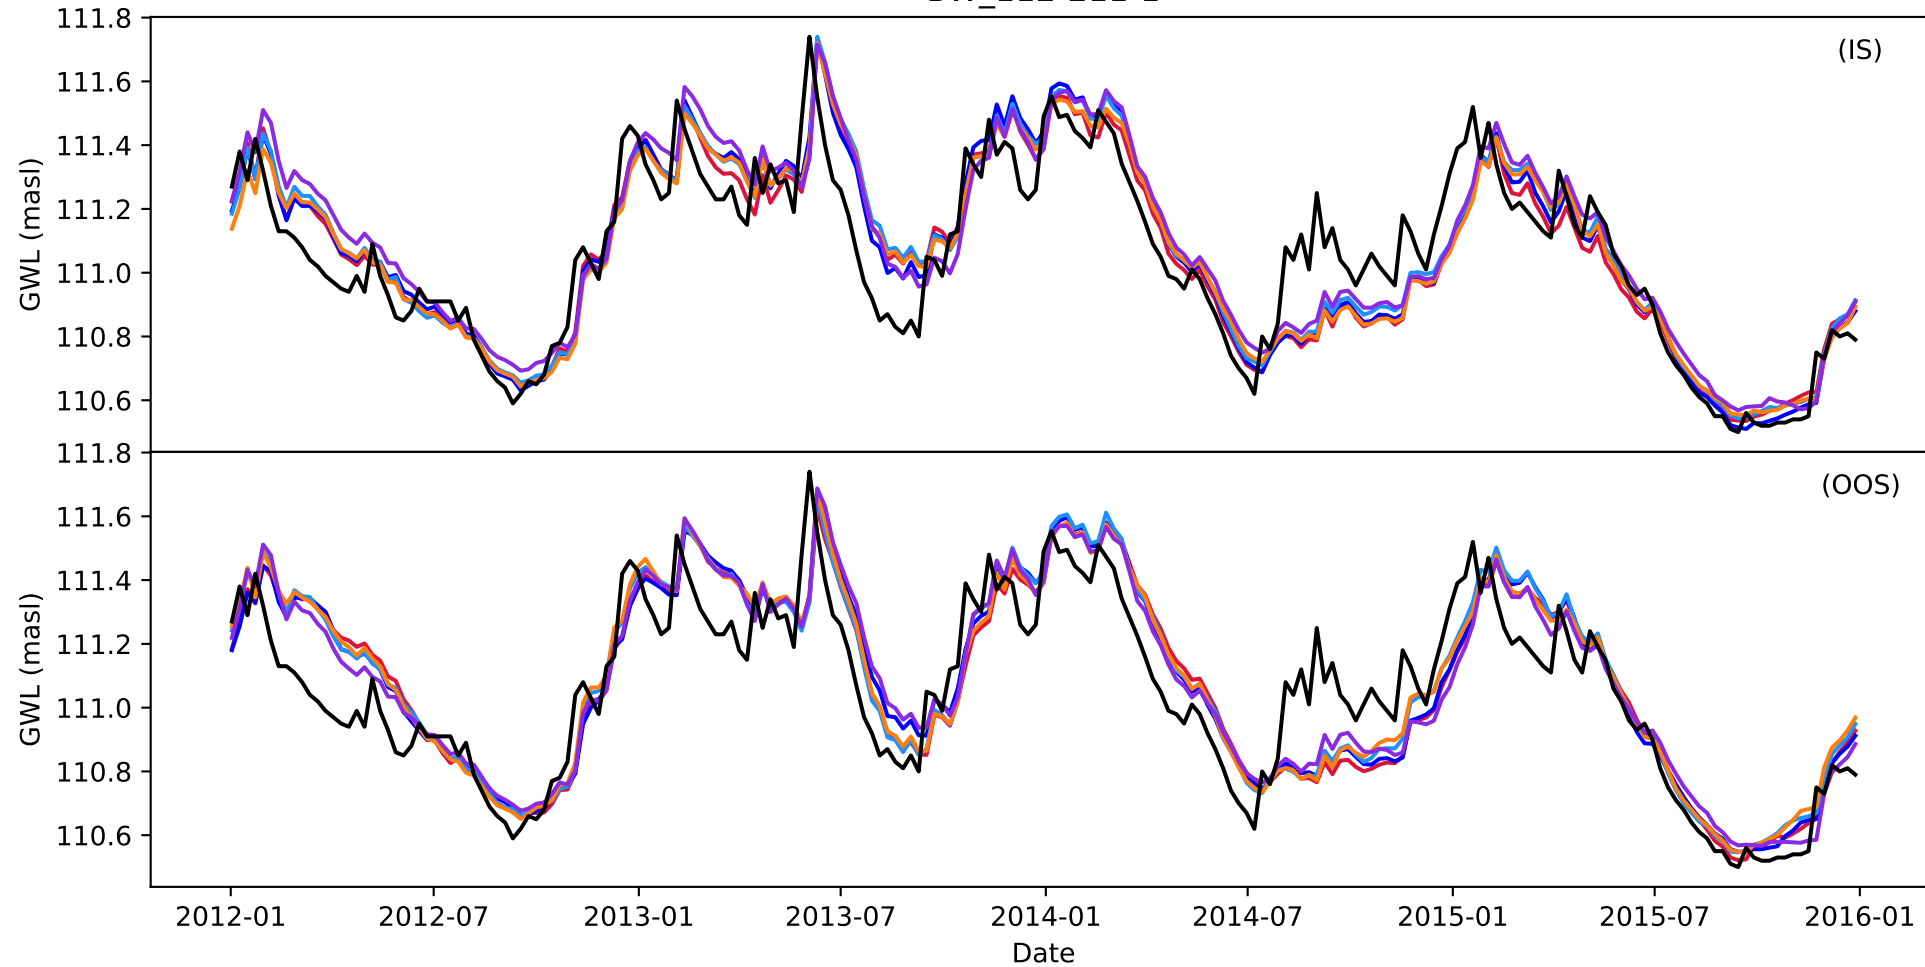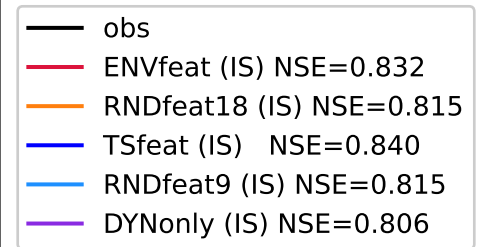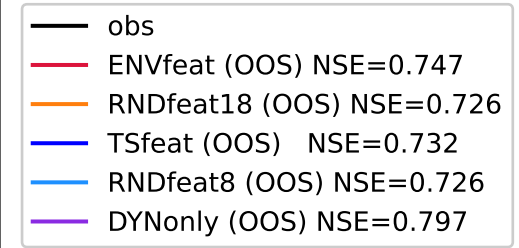

BW\_124-068-9

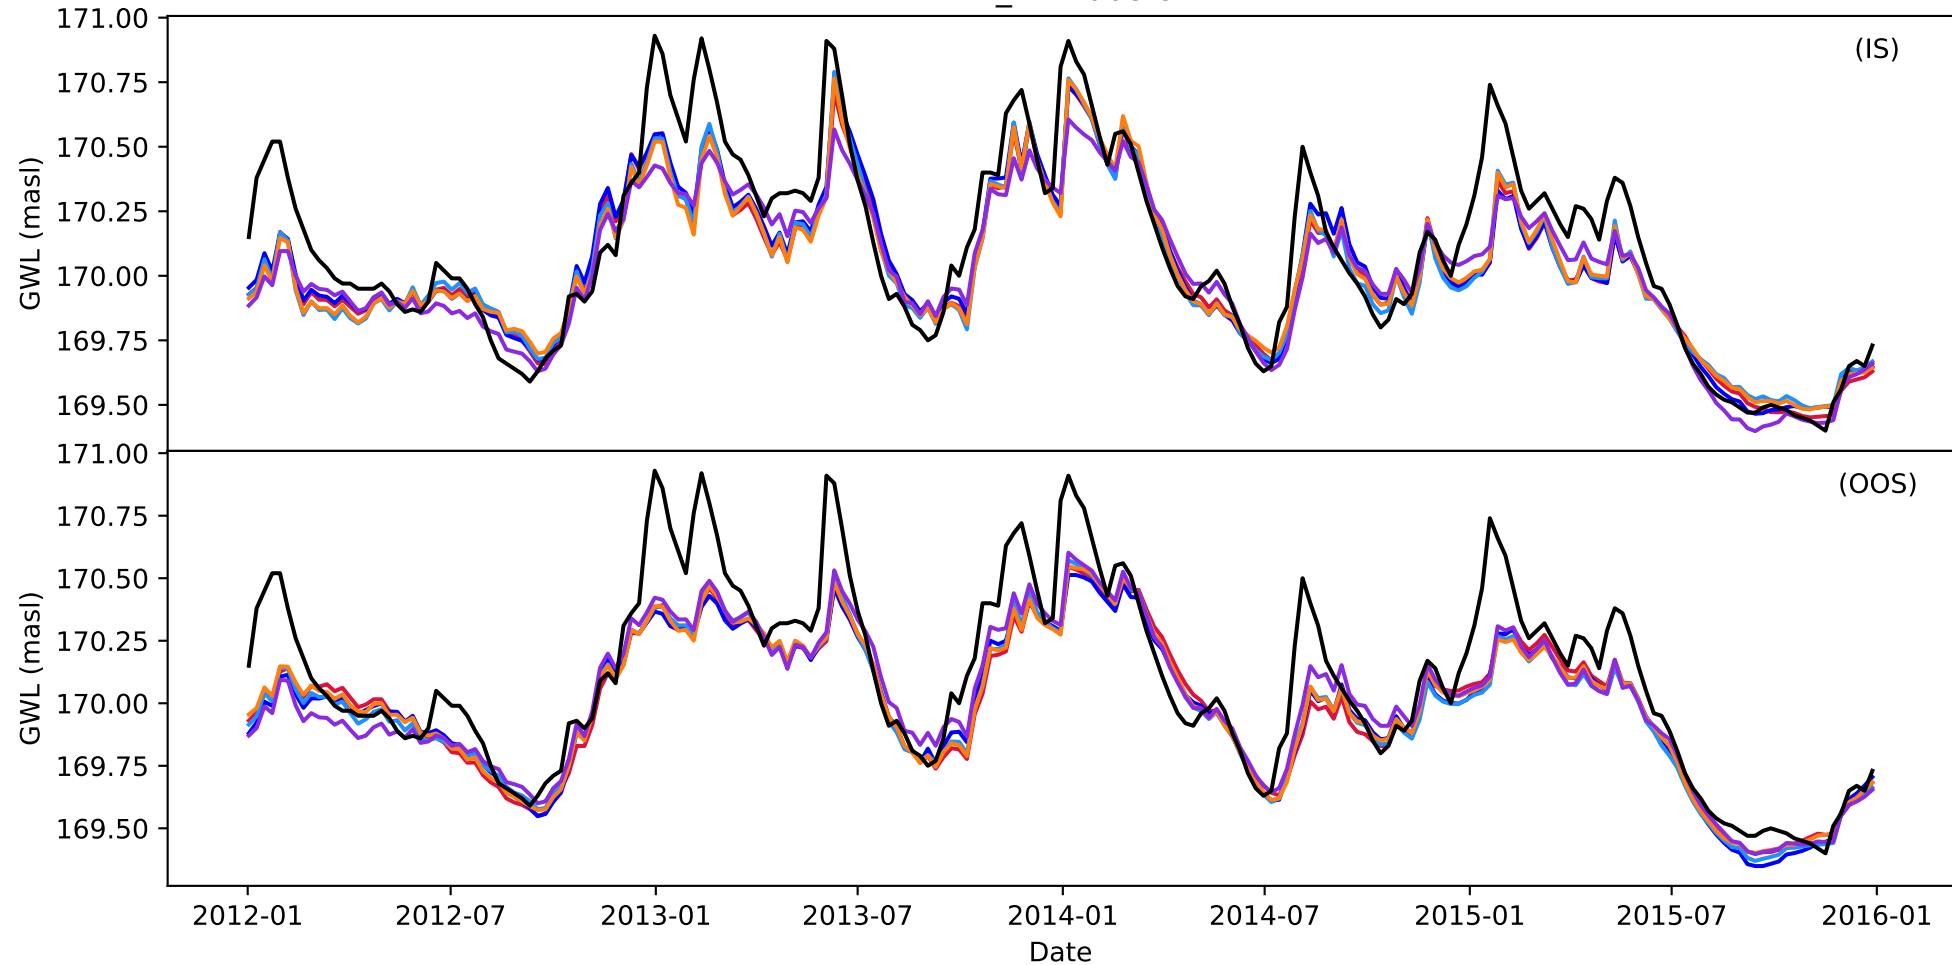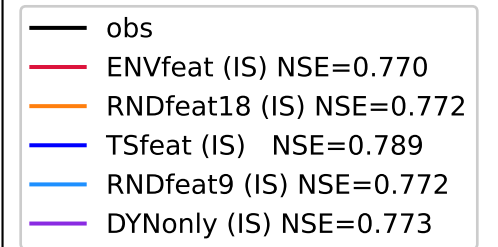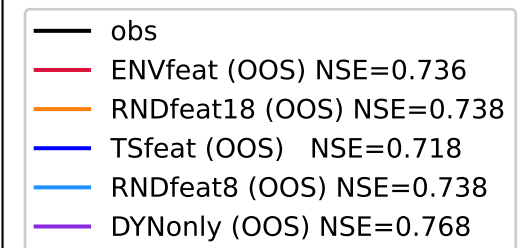

BW\_131-115-0

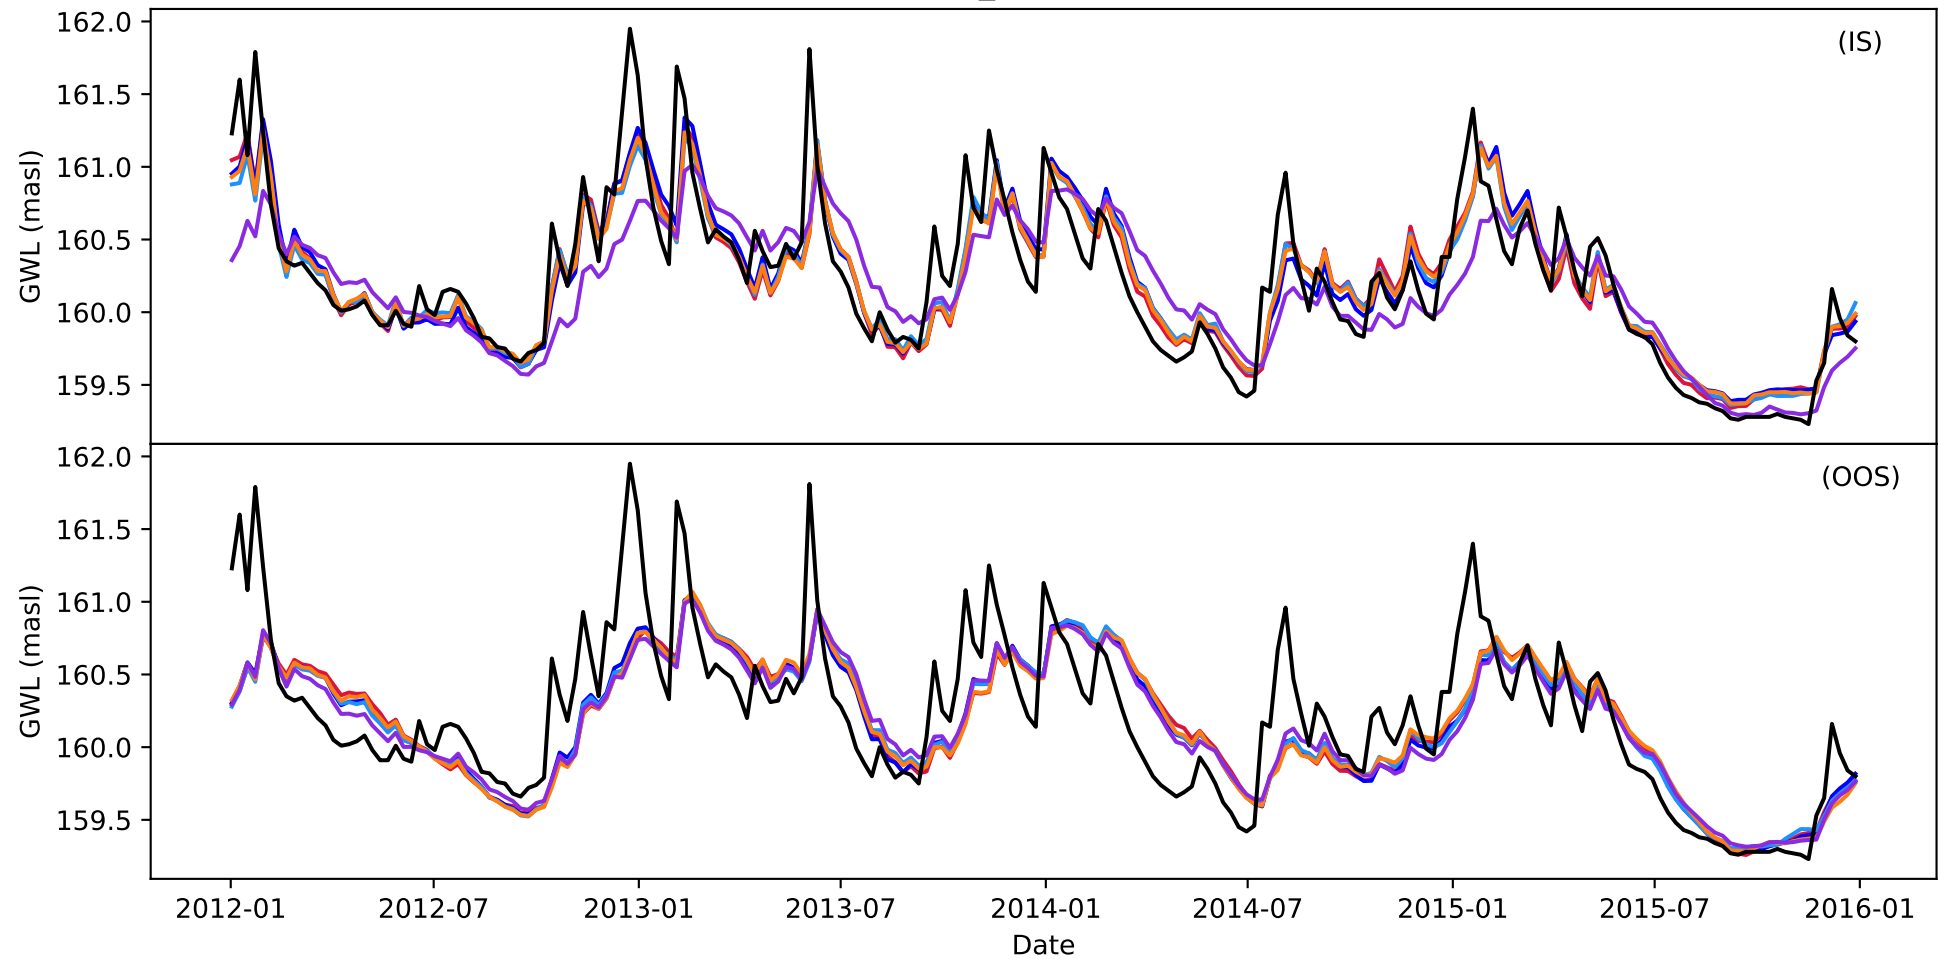

- obs
- ENVfeat (IS) NSE=0.781
- RNDfeat18 (IS) NSE=0.771
- TSfeat (IS) NSE=0.767
- RNDfeat9 (IS) NSE=0.771
- DYNonly (IS) NSE=0.578

- obs
- ENVfeat (OOS) NSE=0.501
- RNDfeat18 (OOS) NSE=0.533
- TSfeat (OOS) NSE=0.568
- RNDfeat8 (OOS) NSE=0.533
- DYNonly (OOS) NSE=0.560

BW\_145-772-0

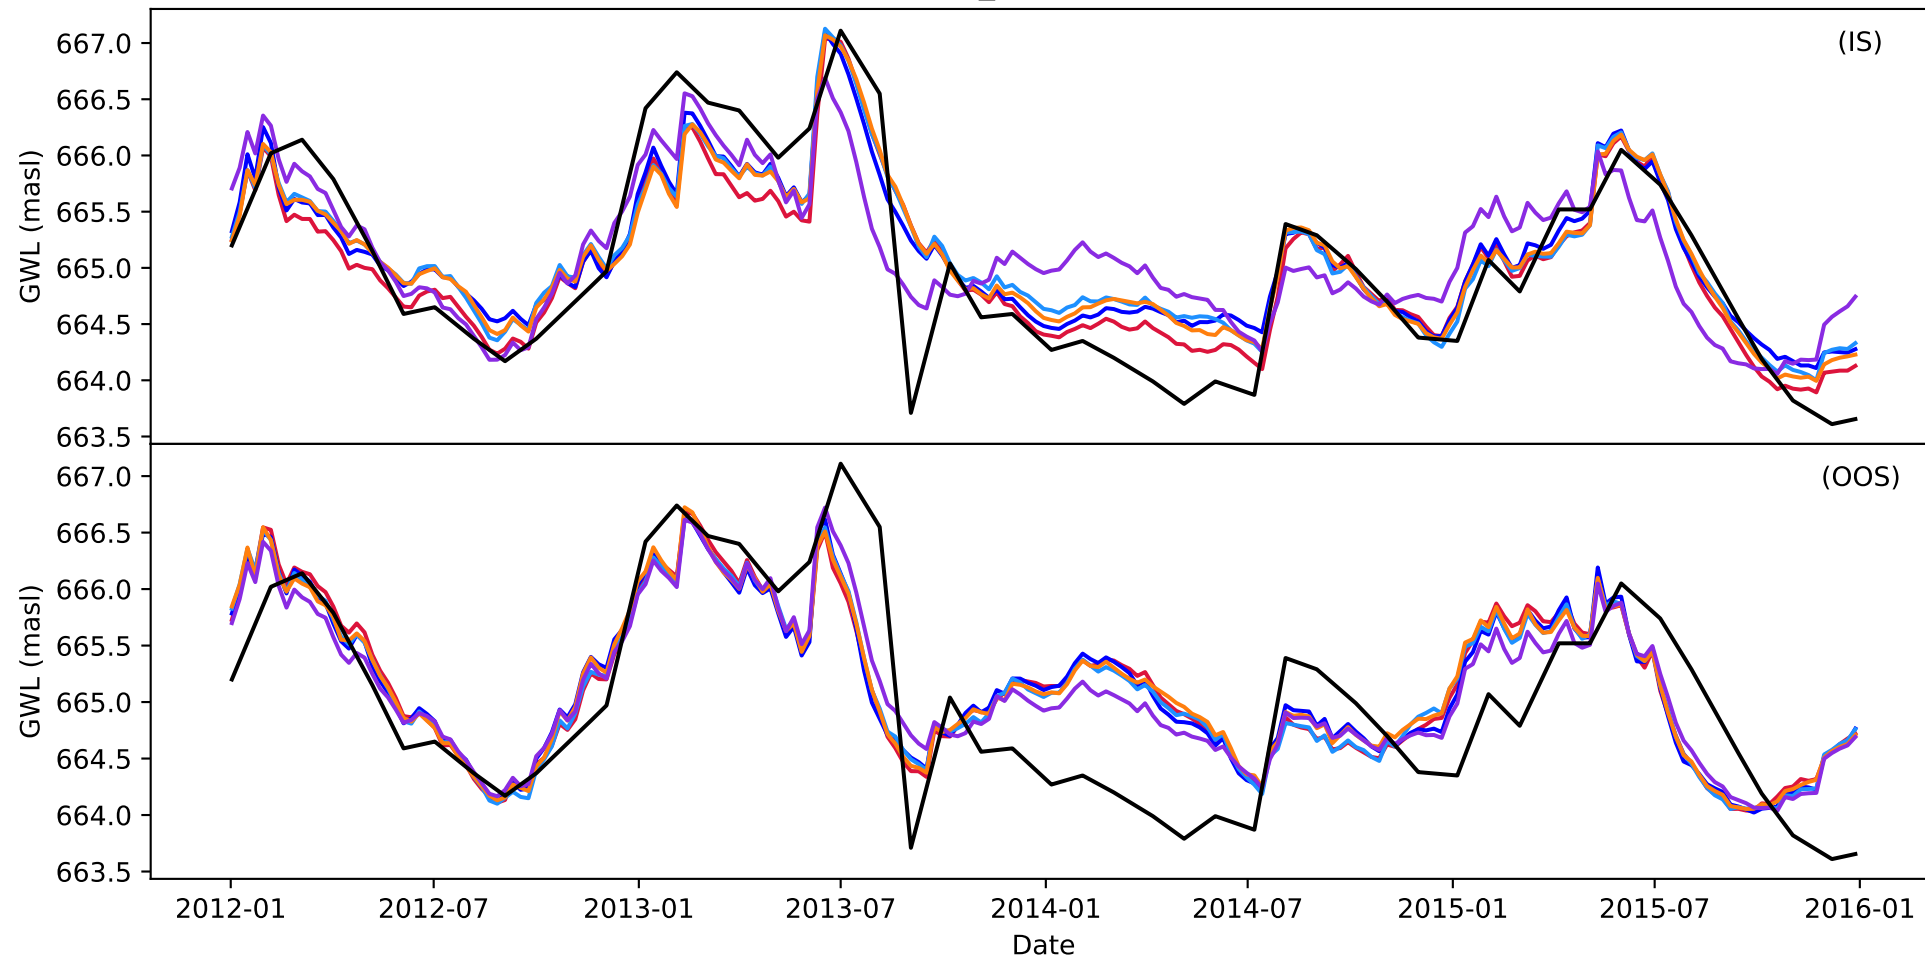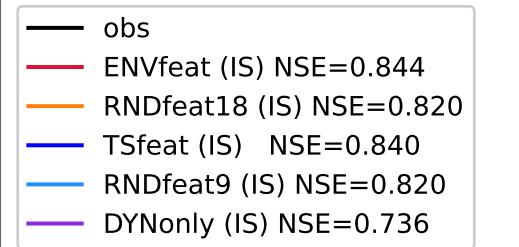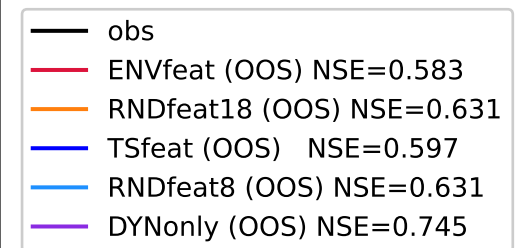

BW\_194-069-9

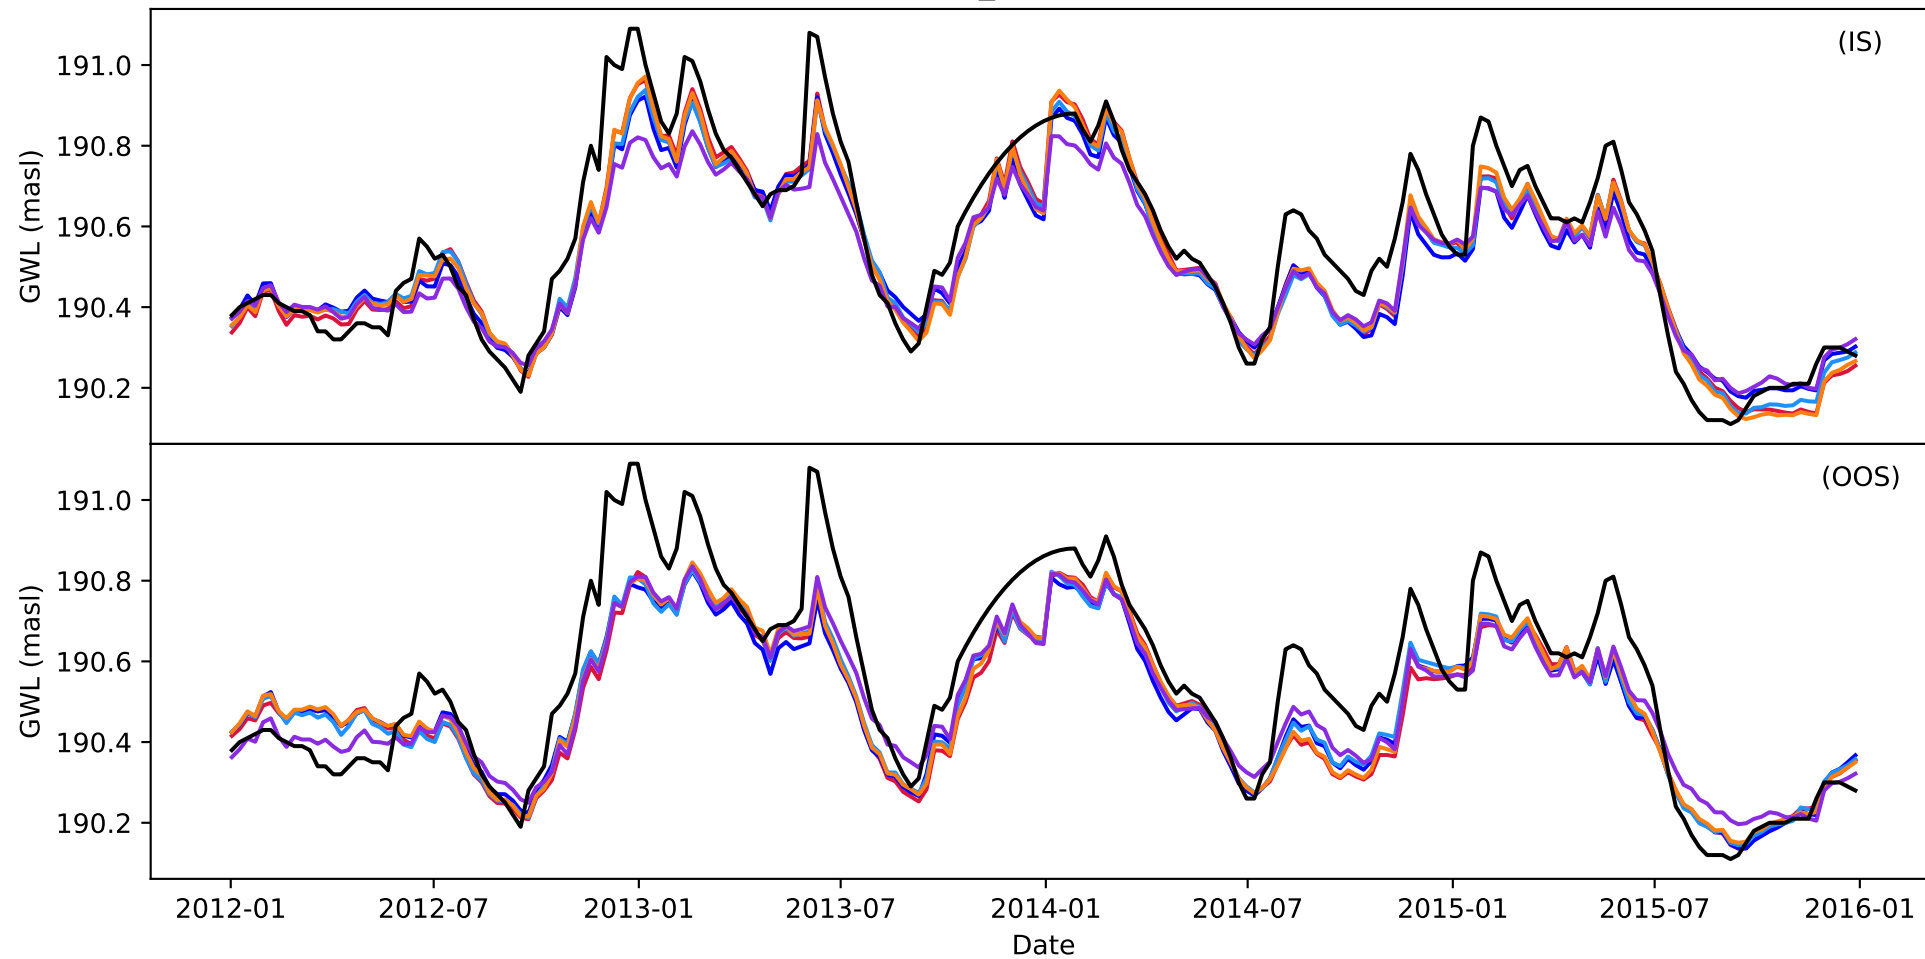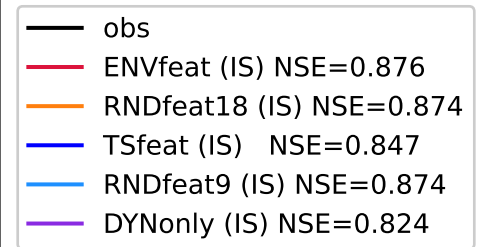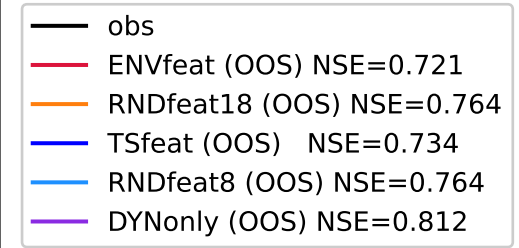

BY\_3108

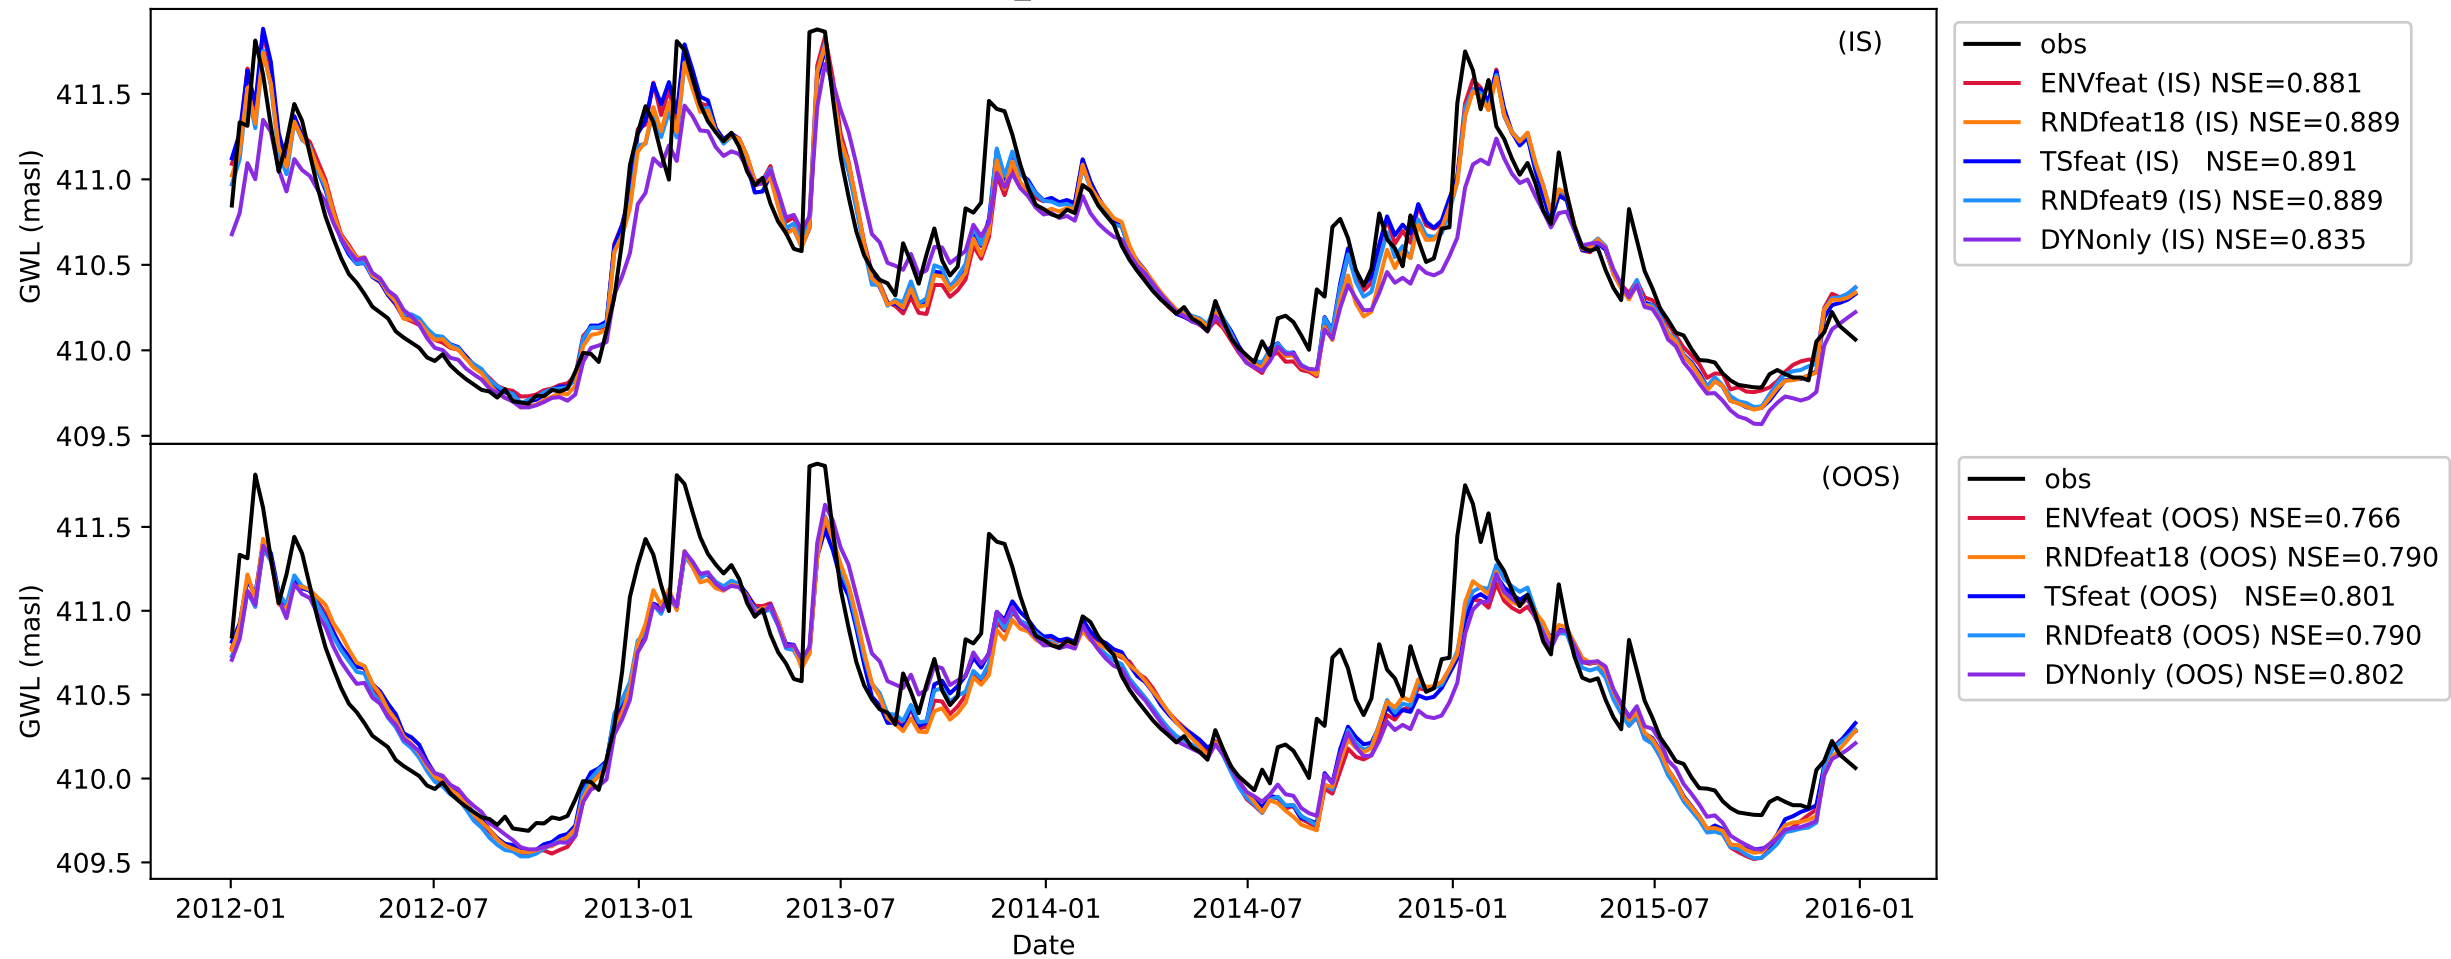

BY\_5158

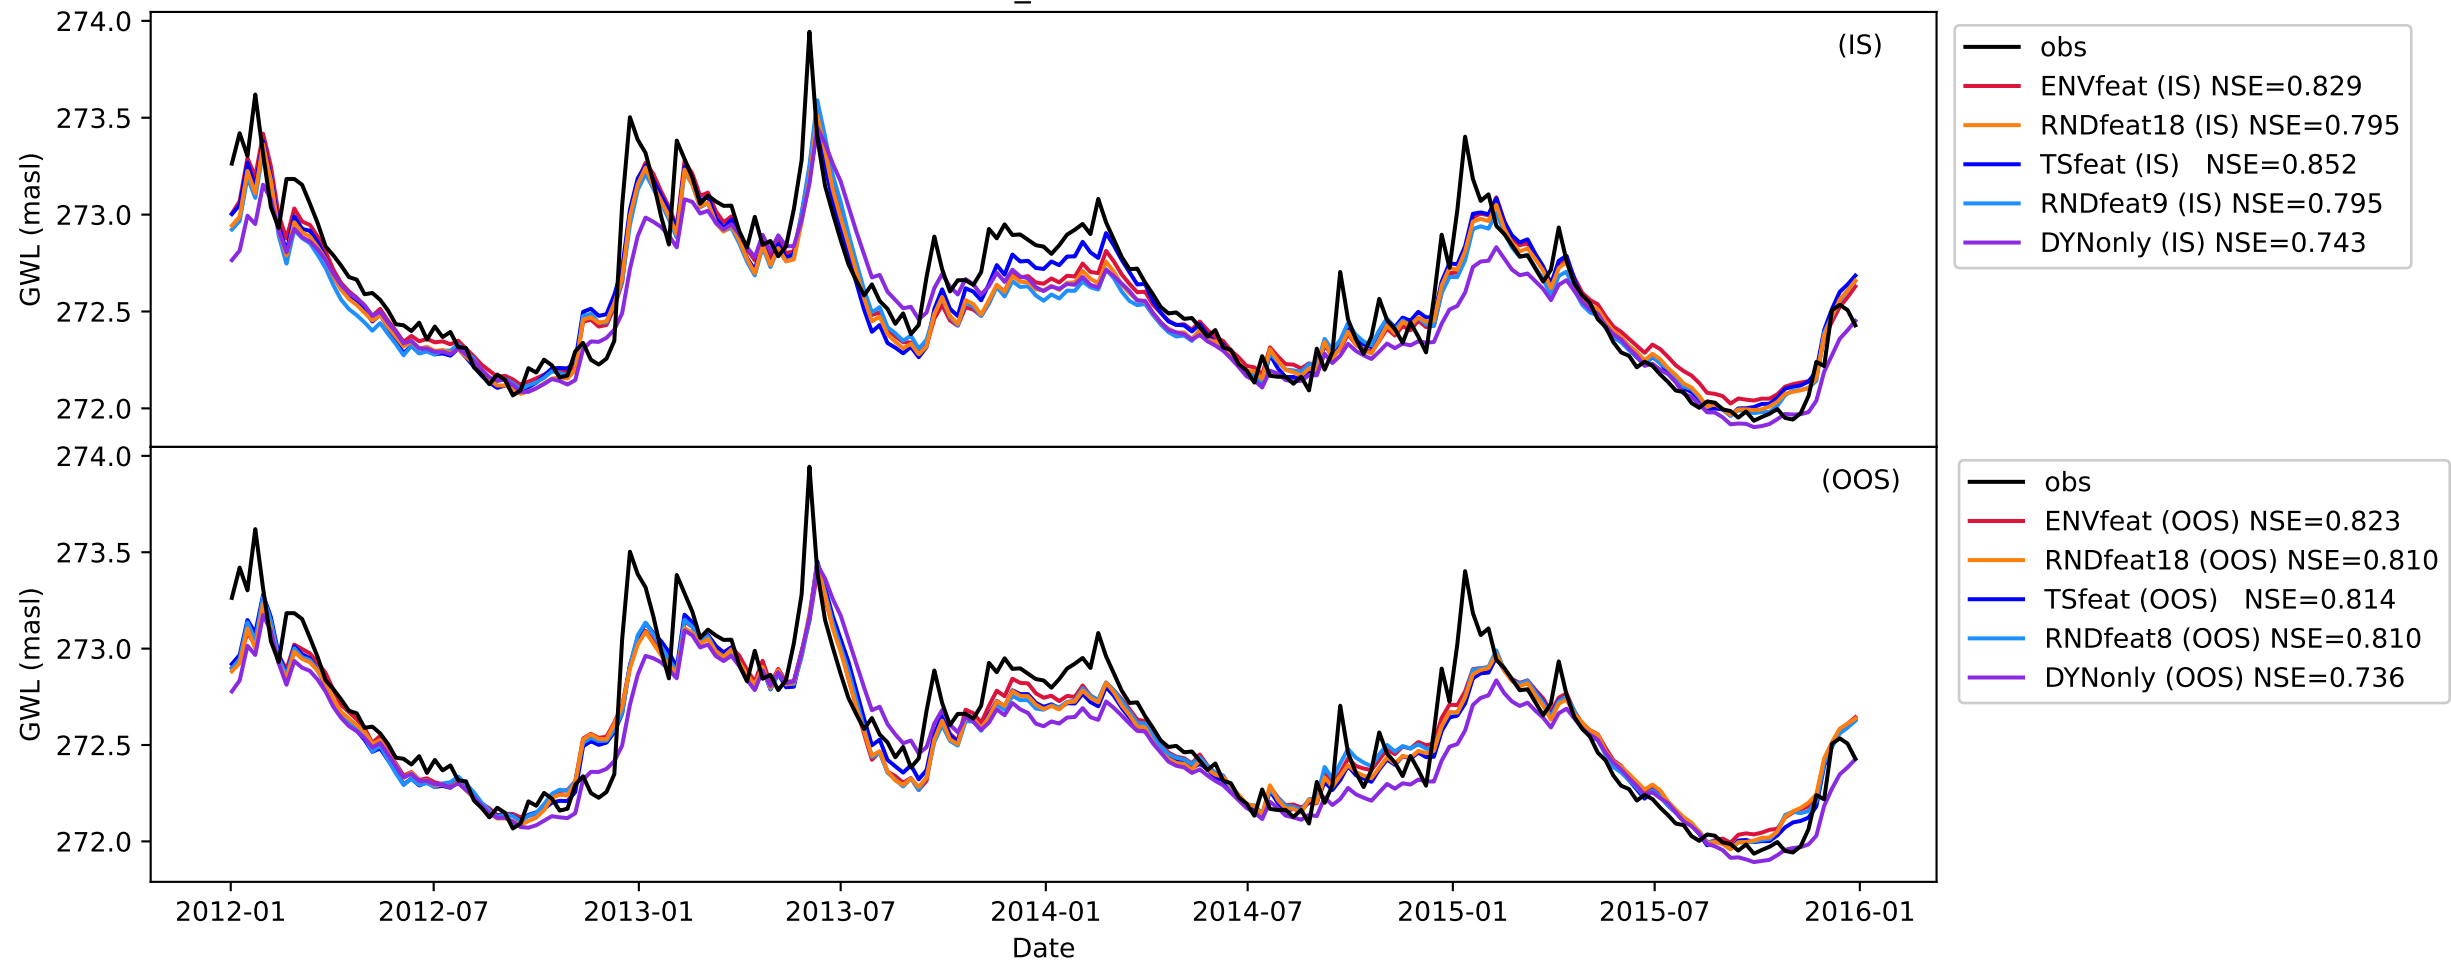



# BY\_5162

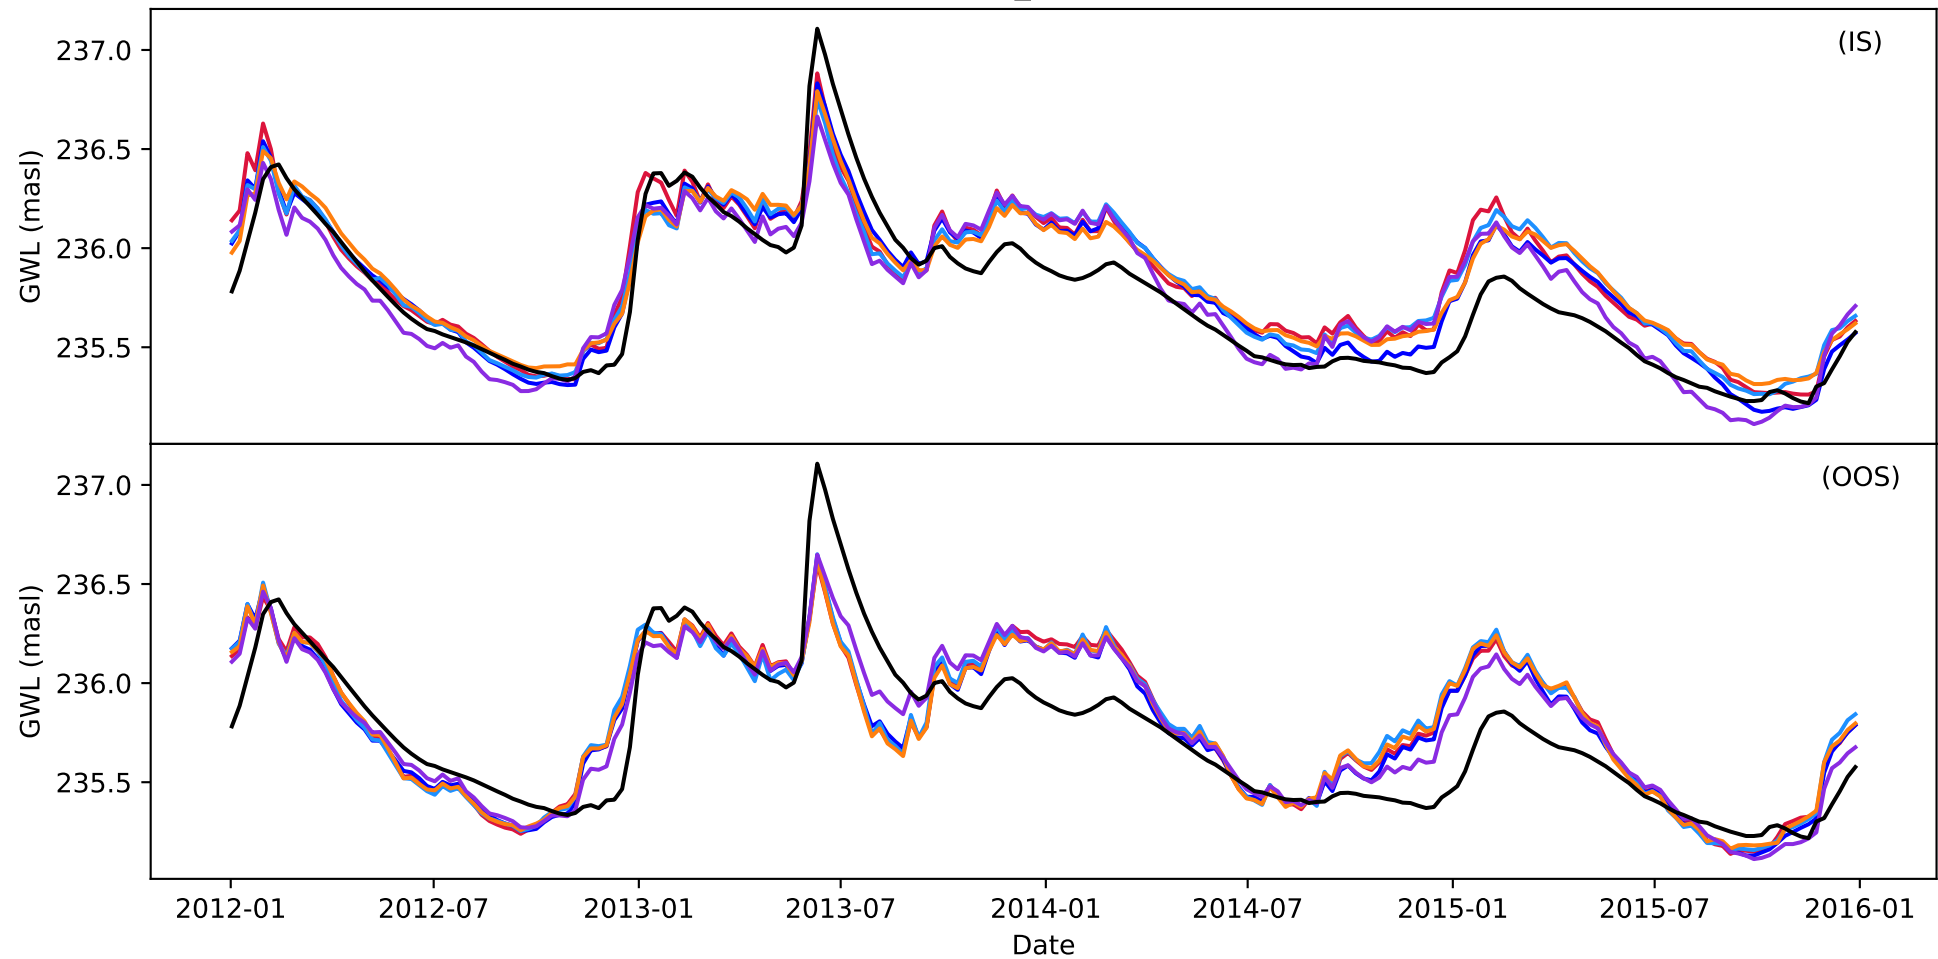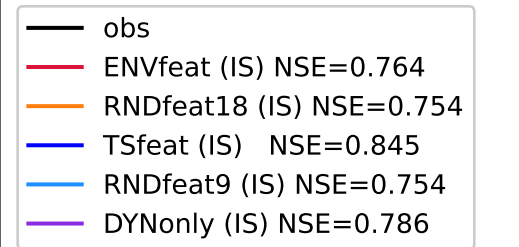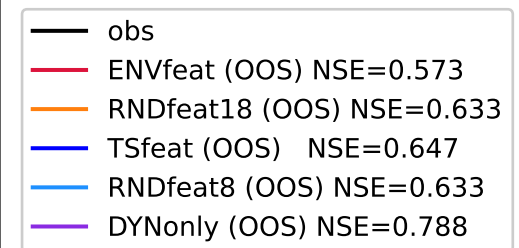

BY\_7126

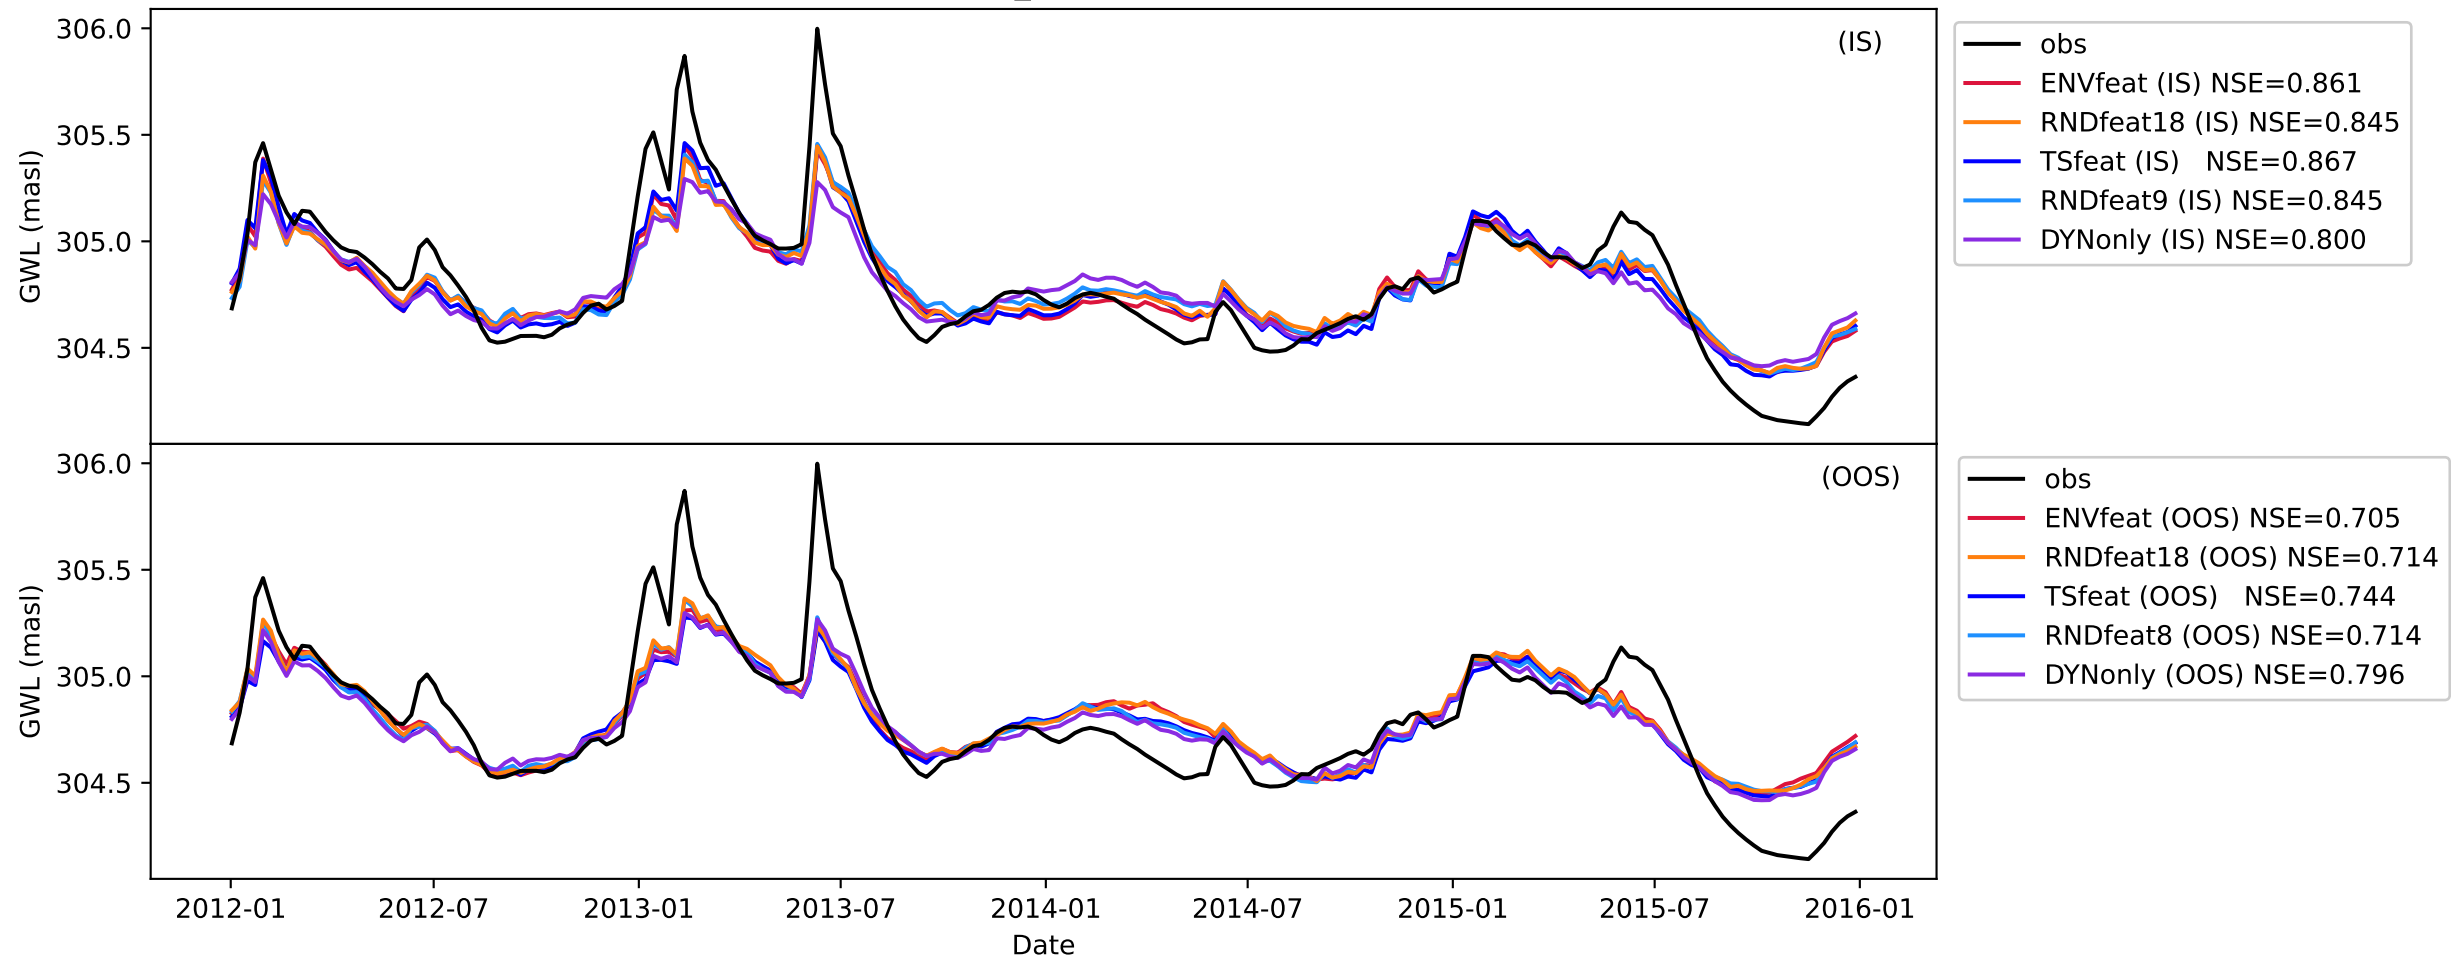

# BY\_8252

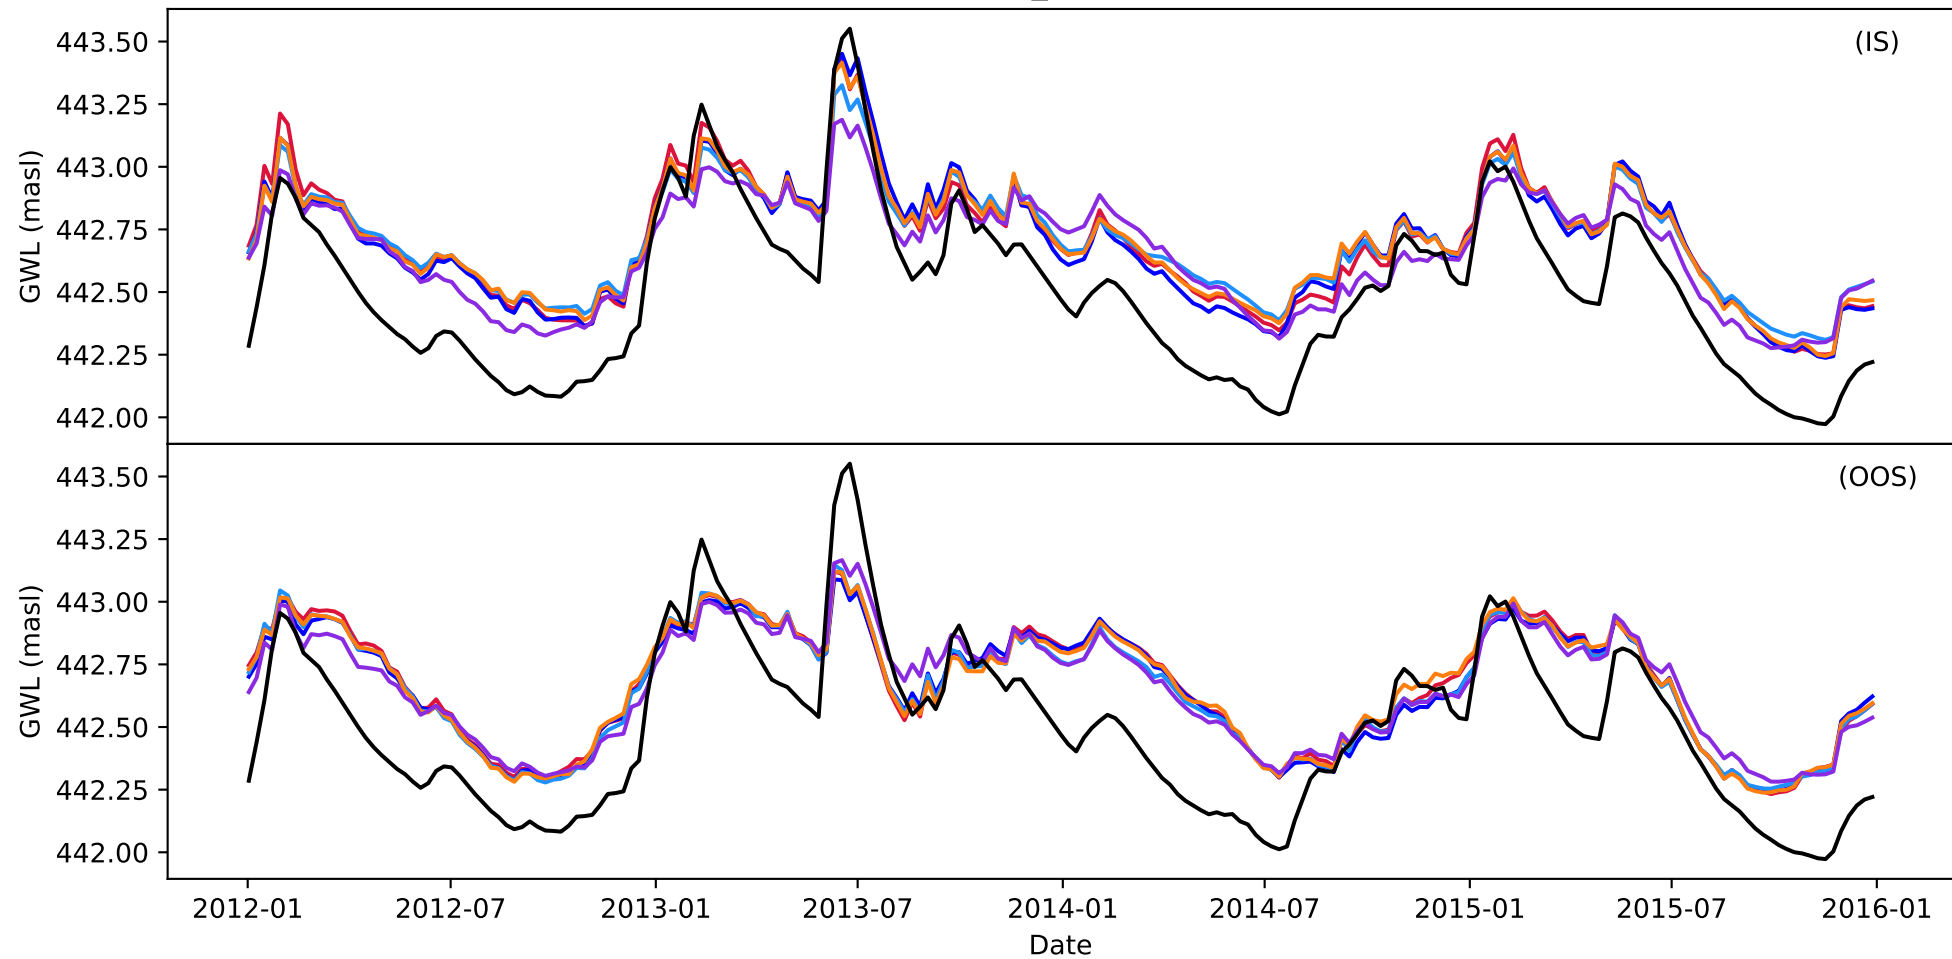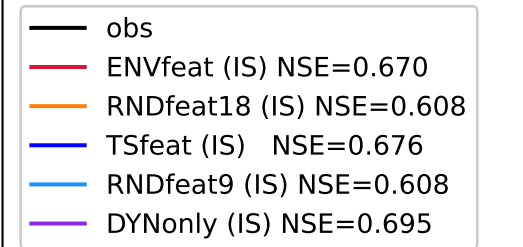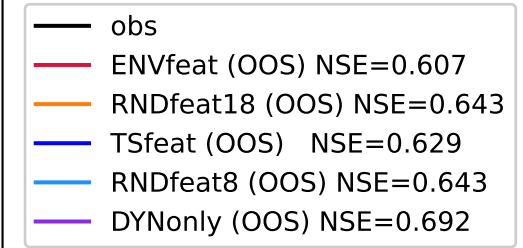

BY\_9275

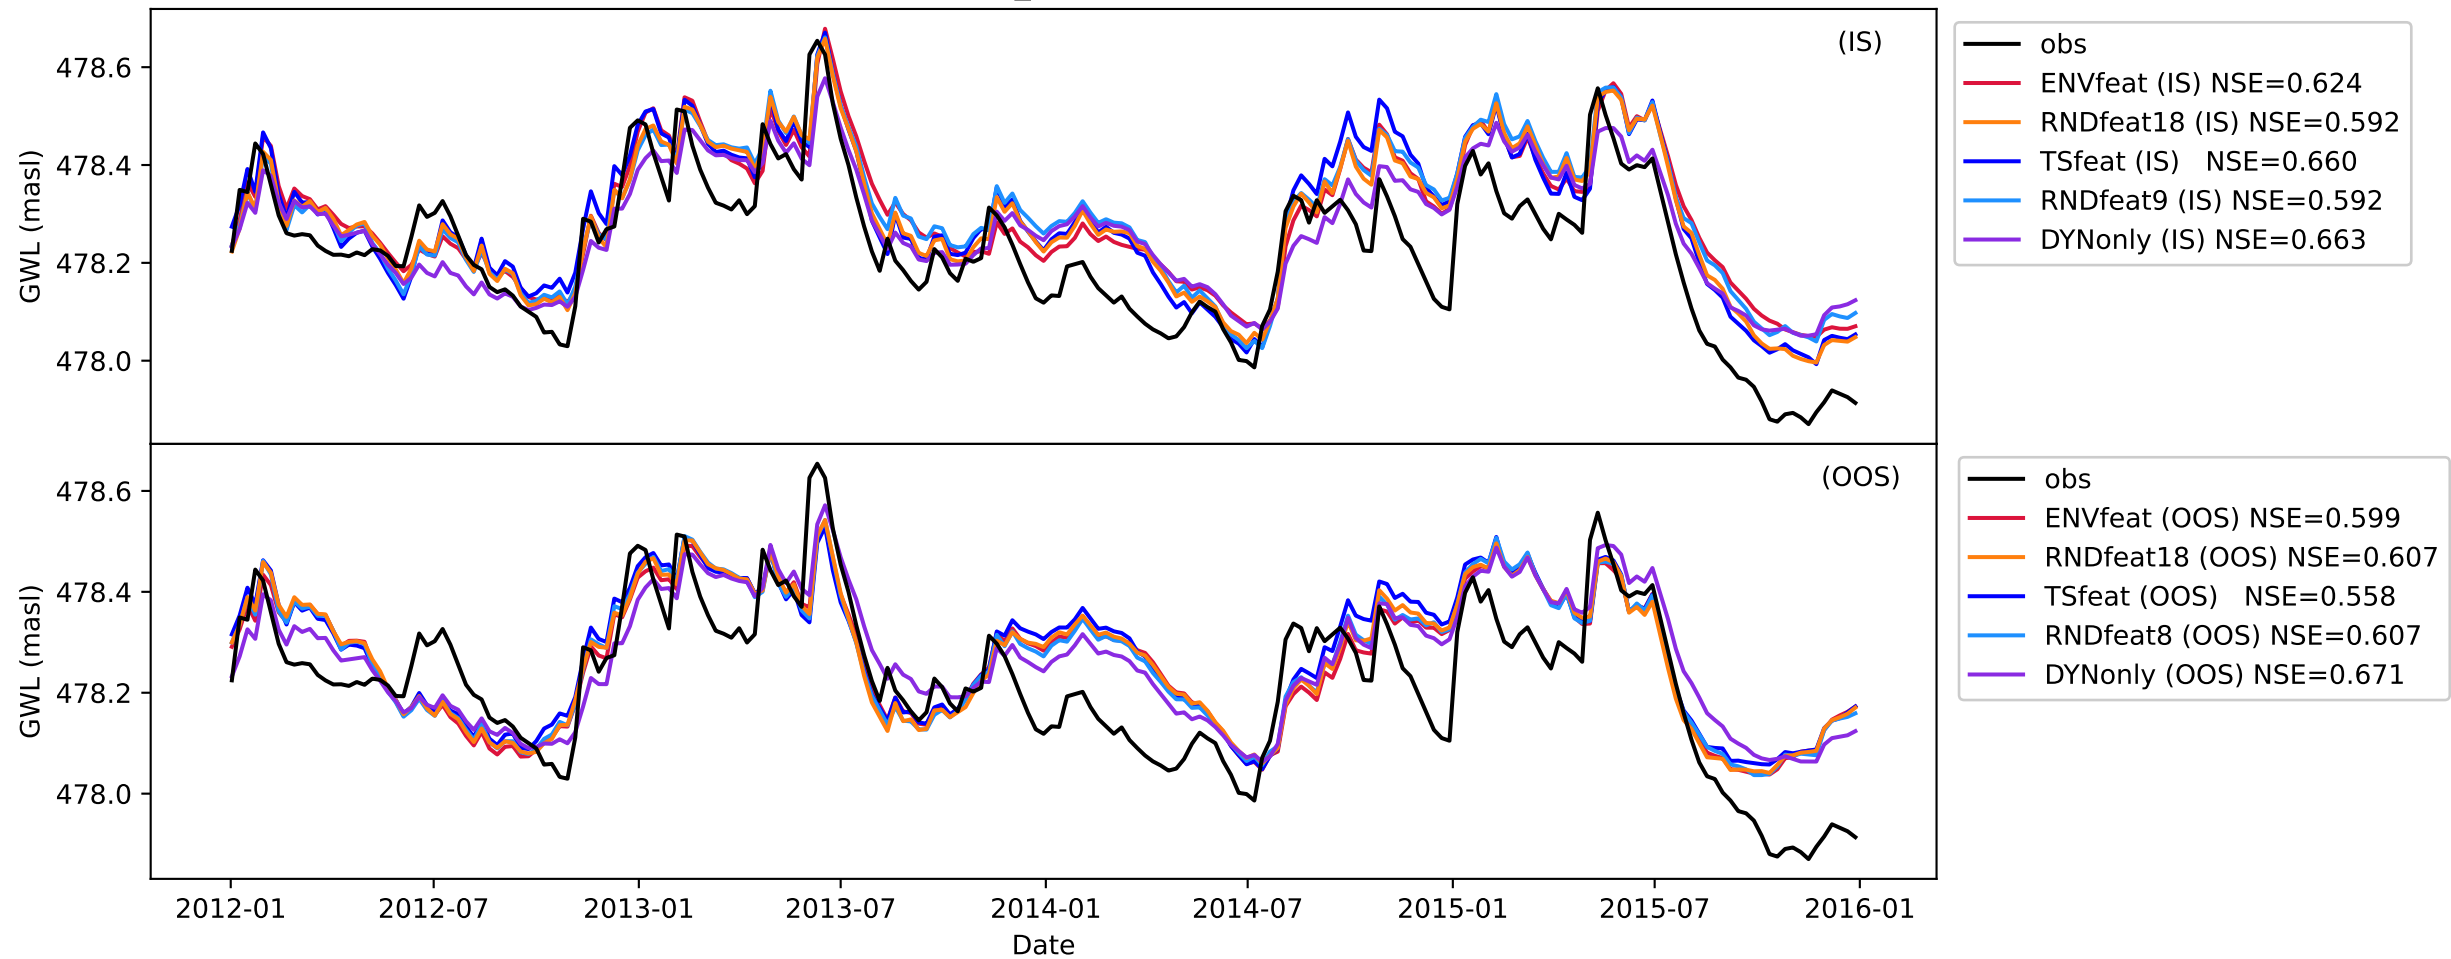

BY\_11119

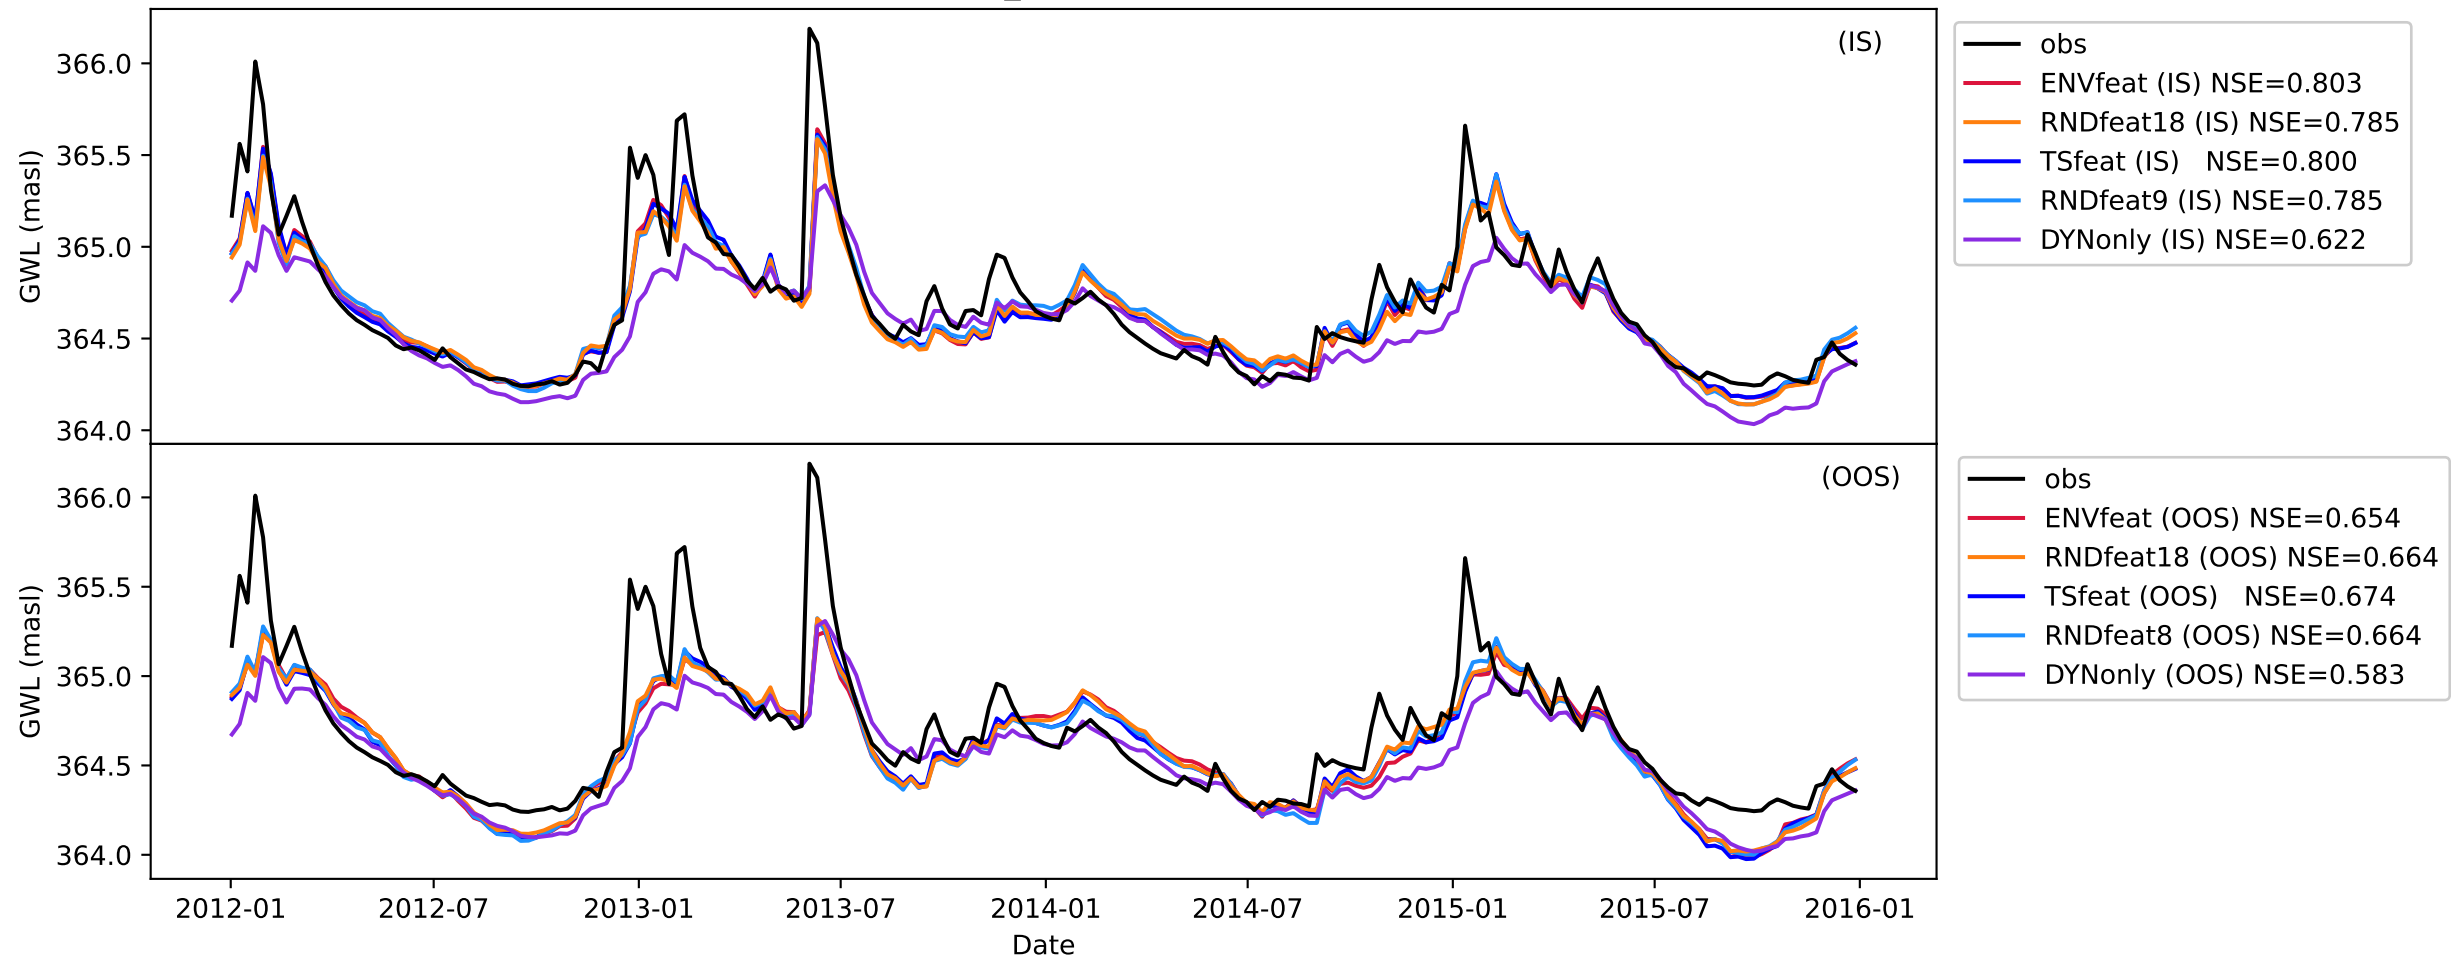

BY\_13126

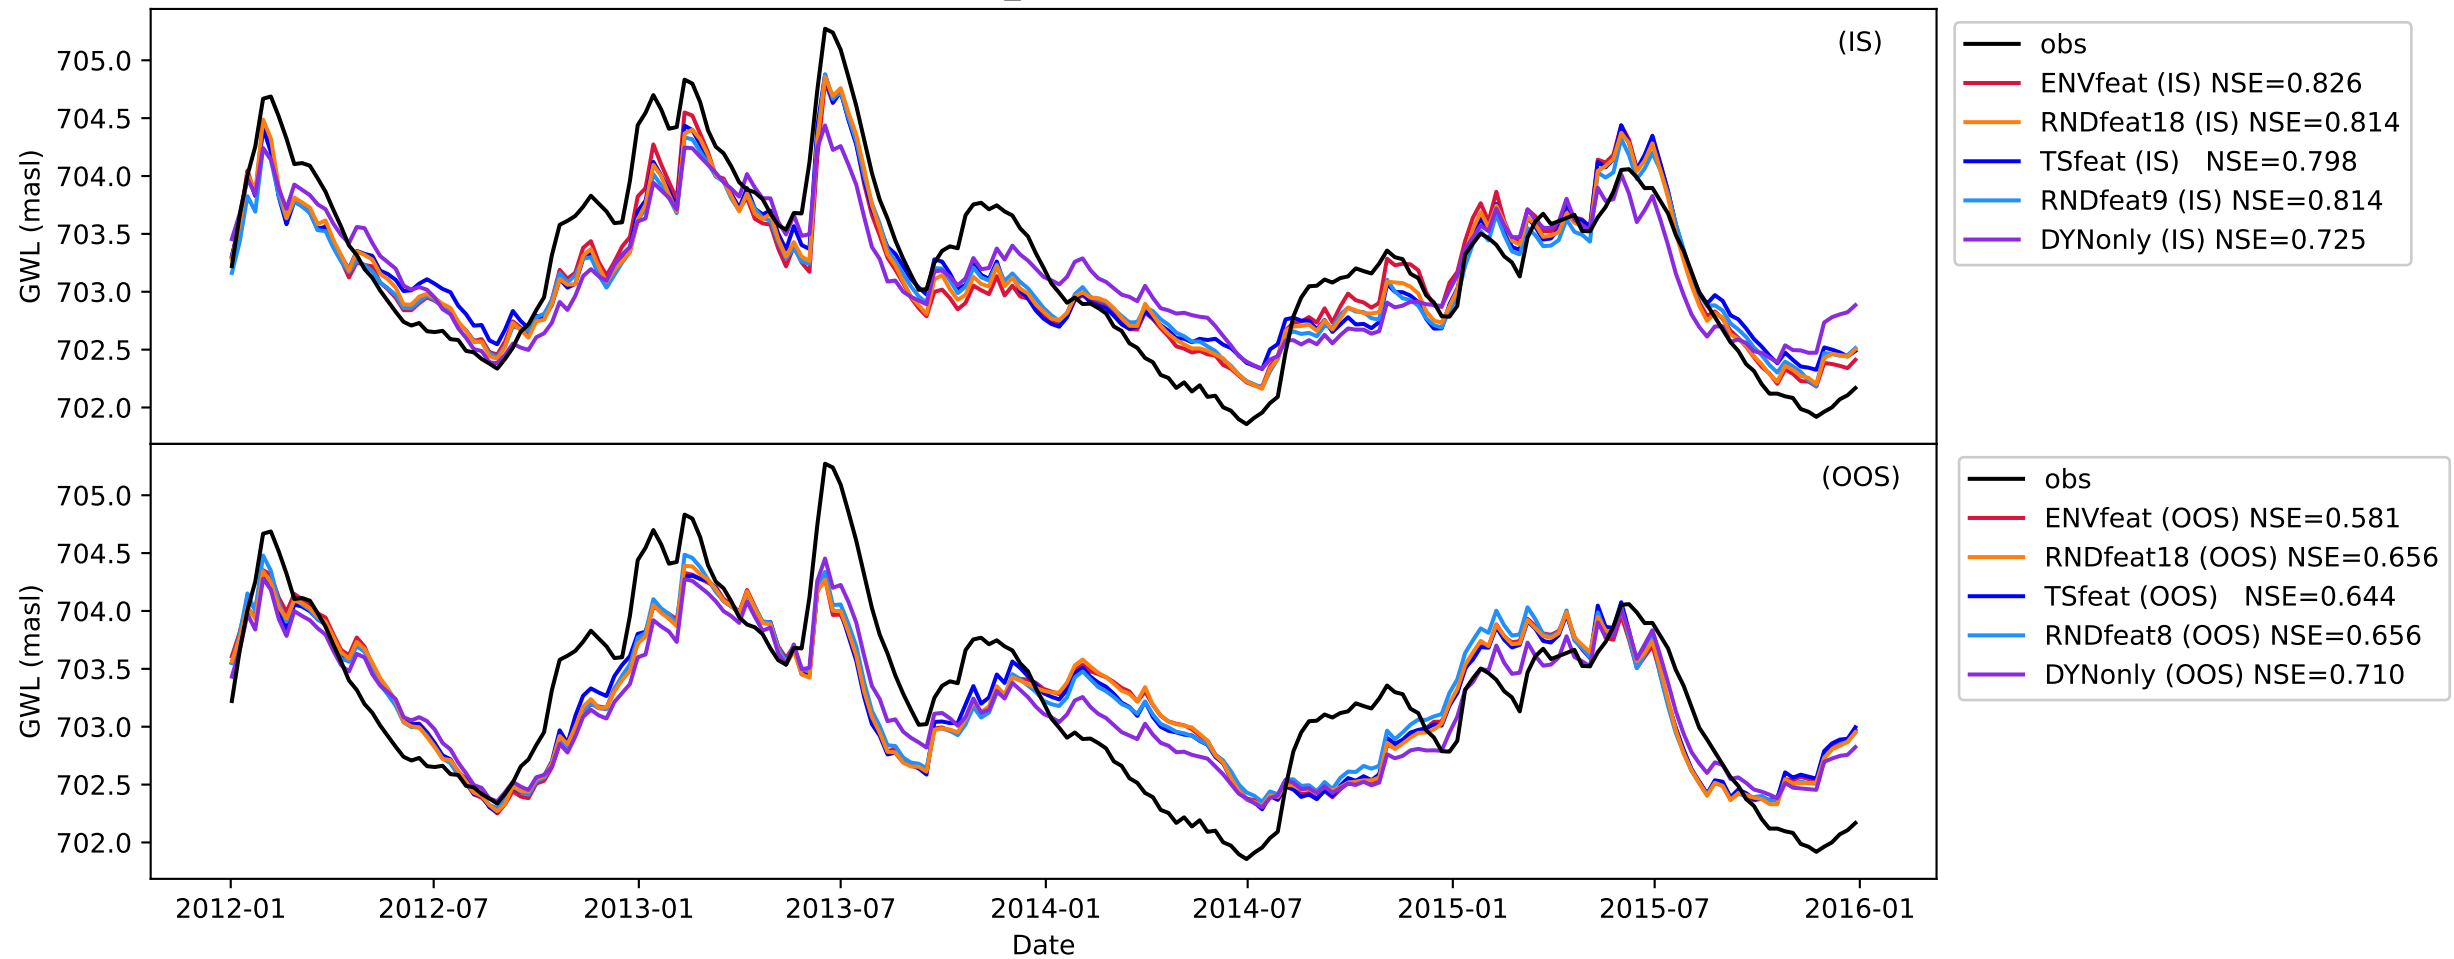

BY\_15120

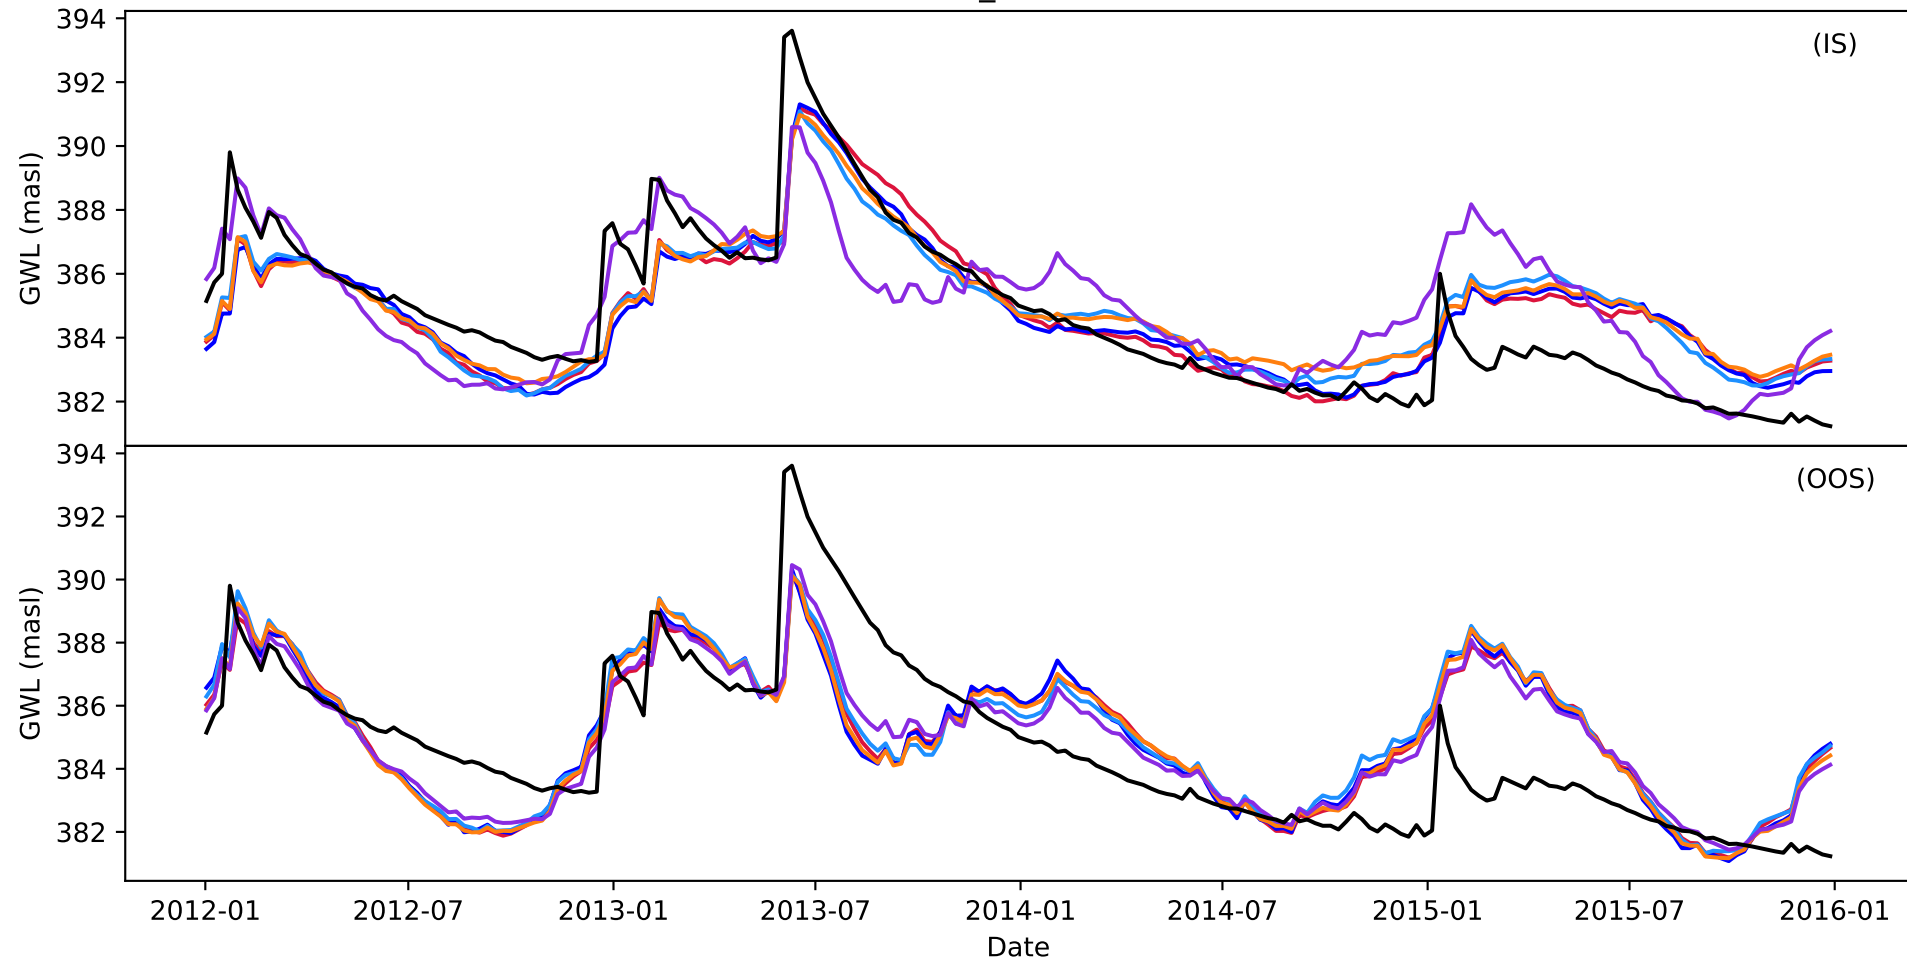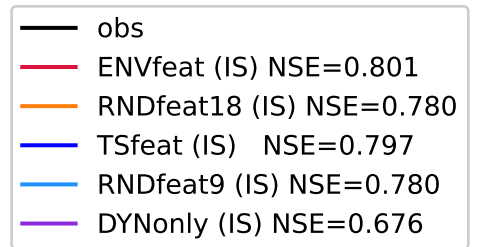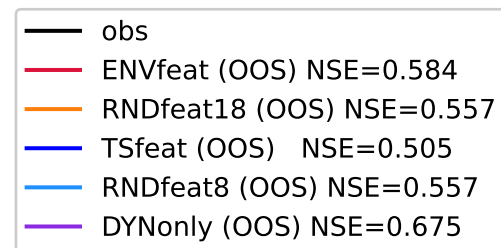

BY\_22008

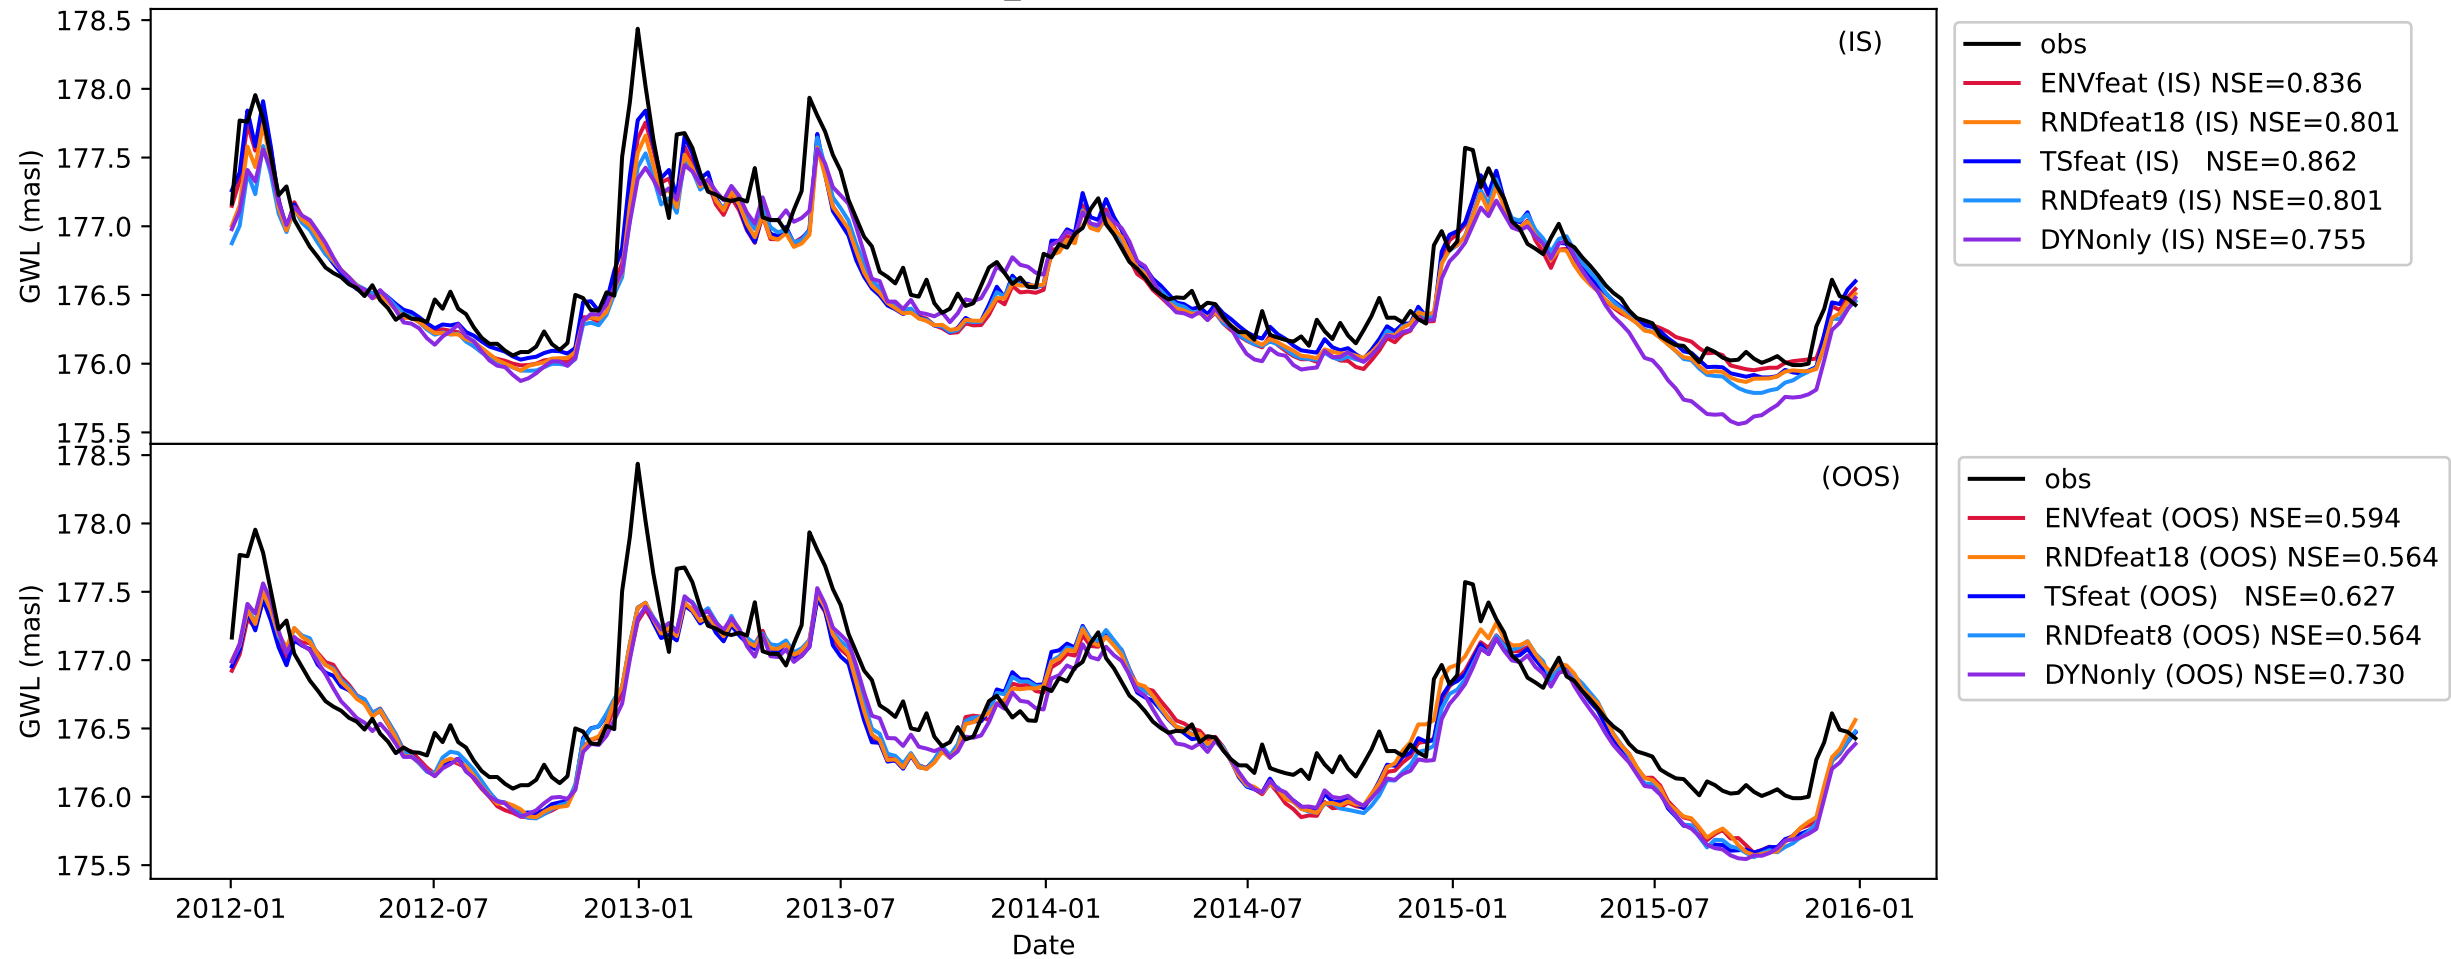



BY\_24153

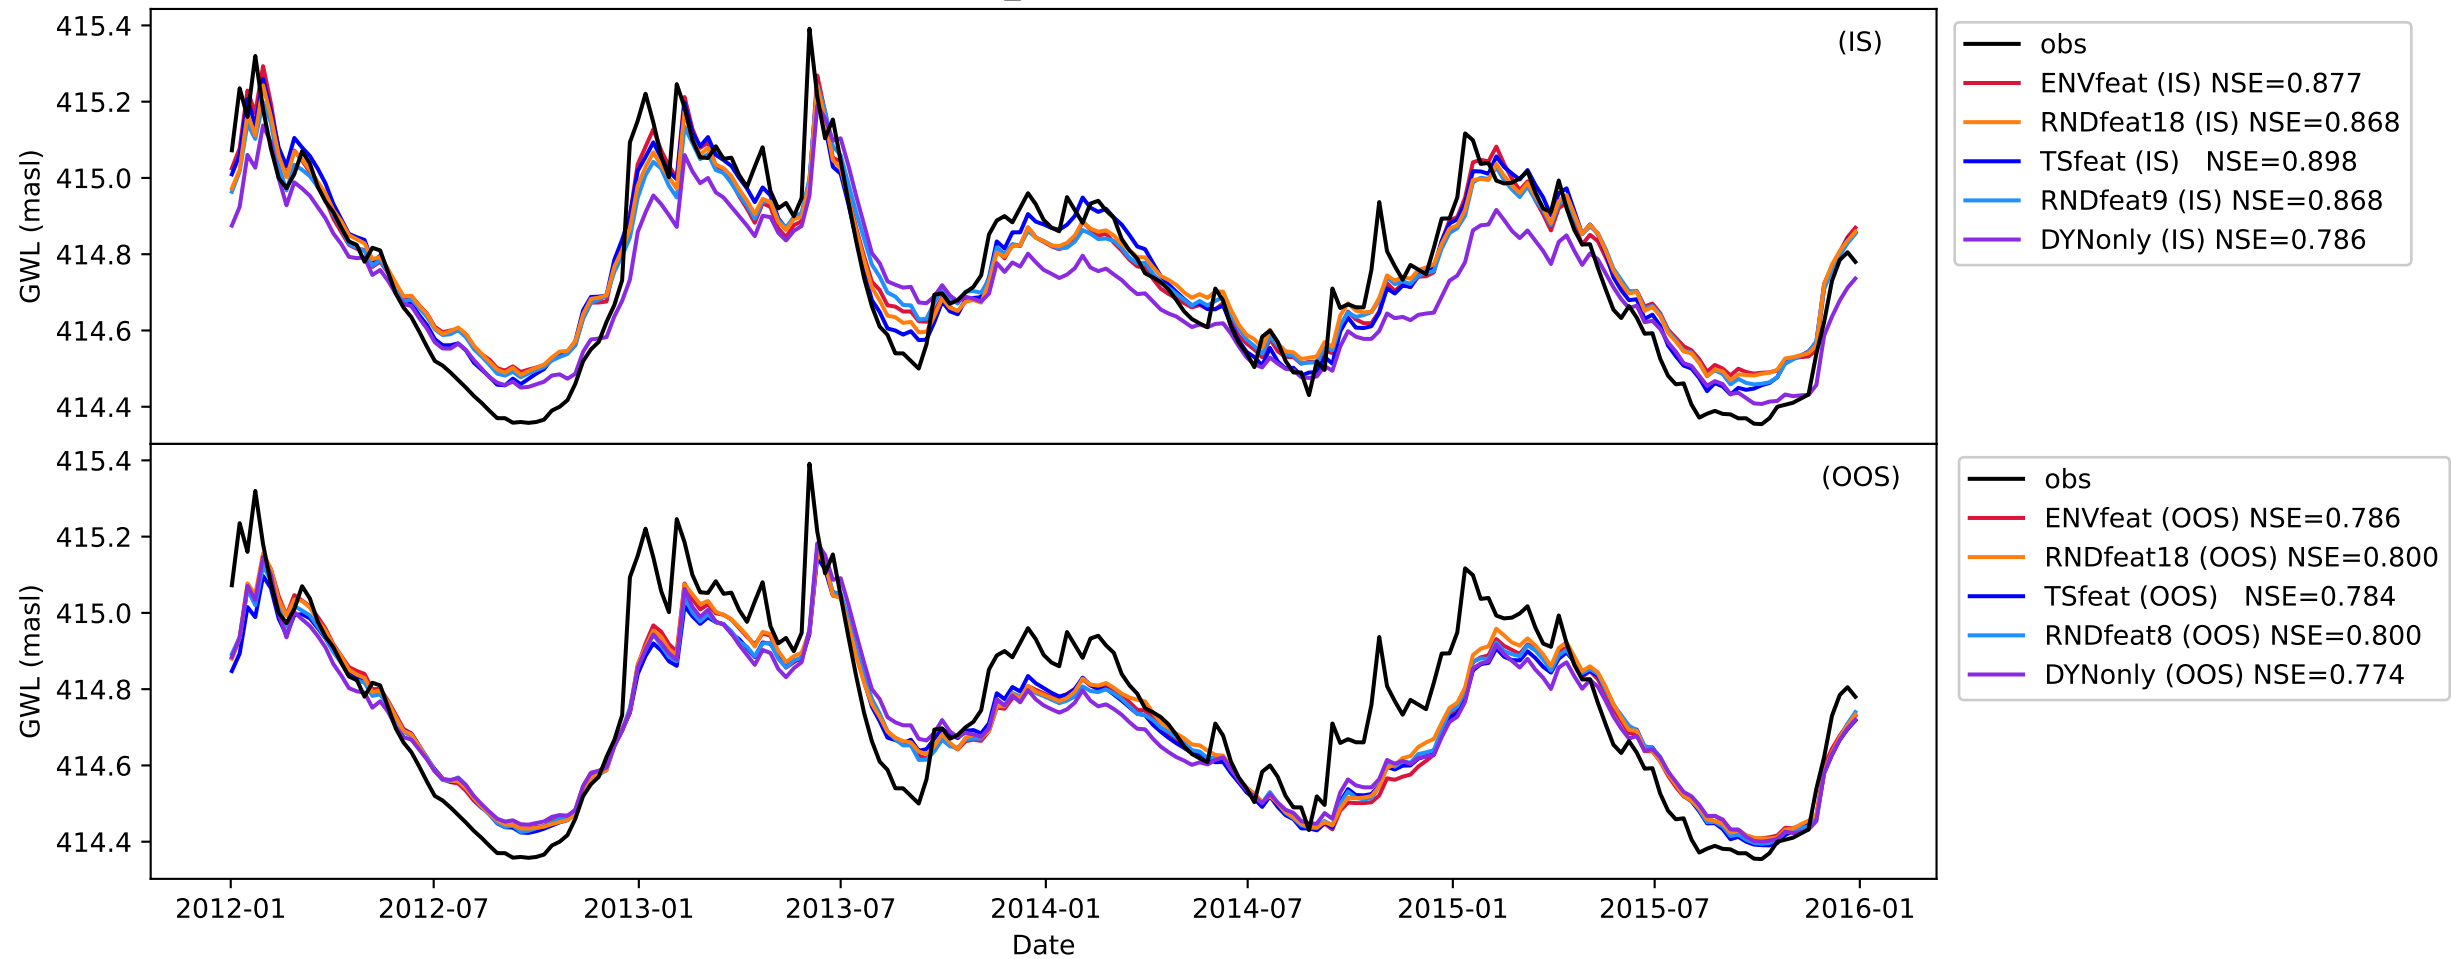

BY\_25155

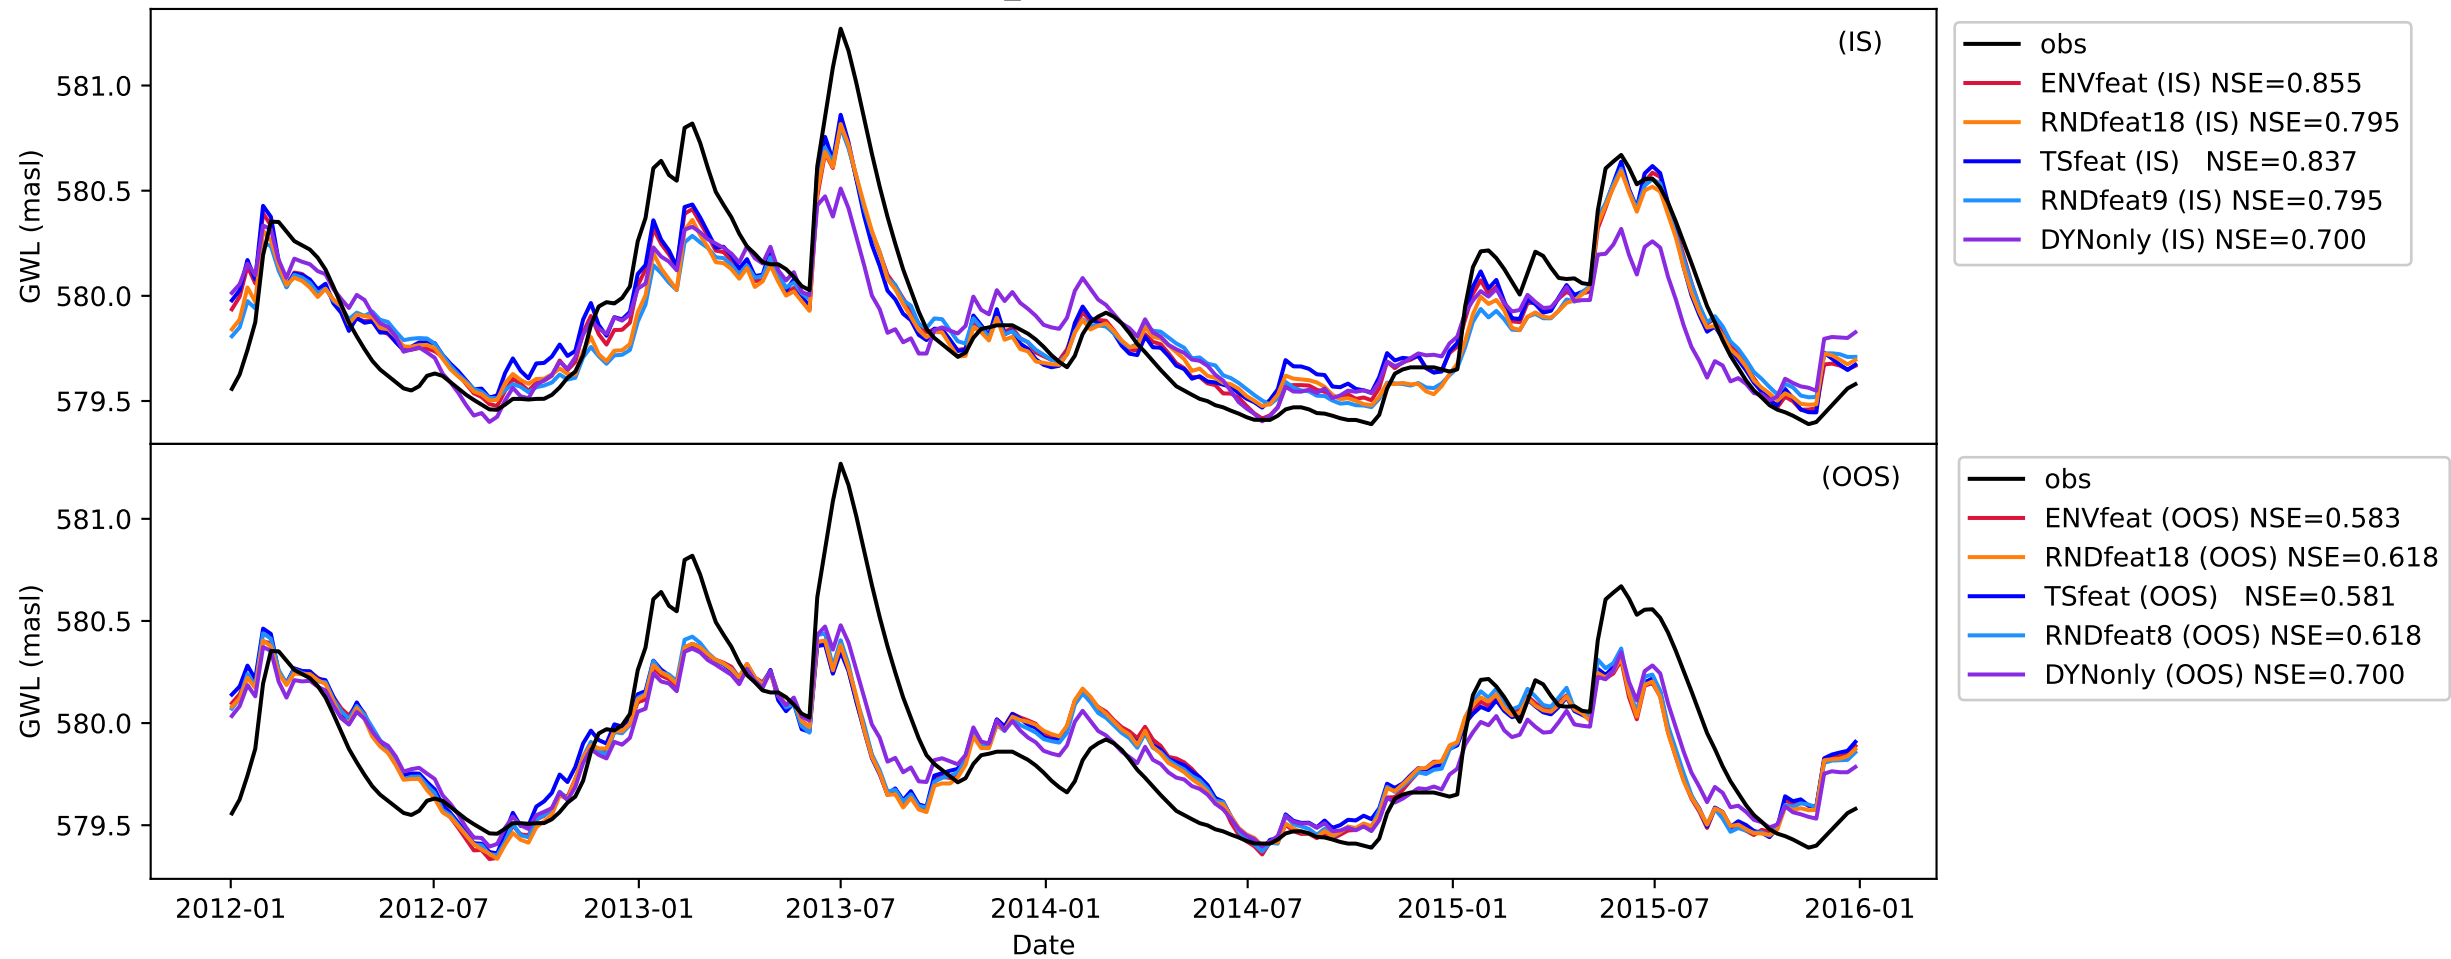

BY\_83614

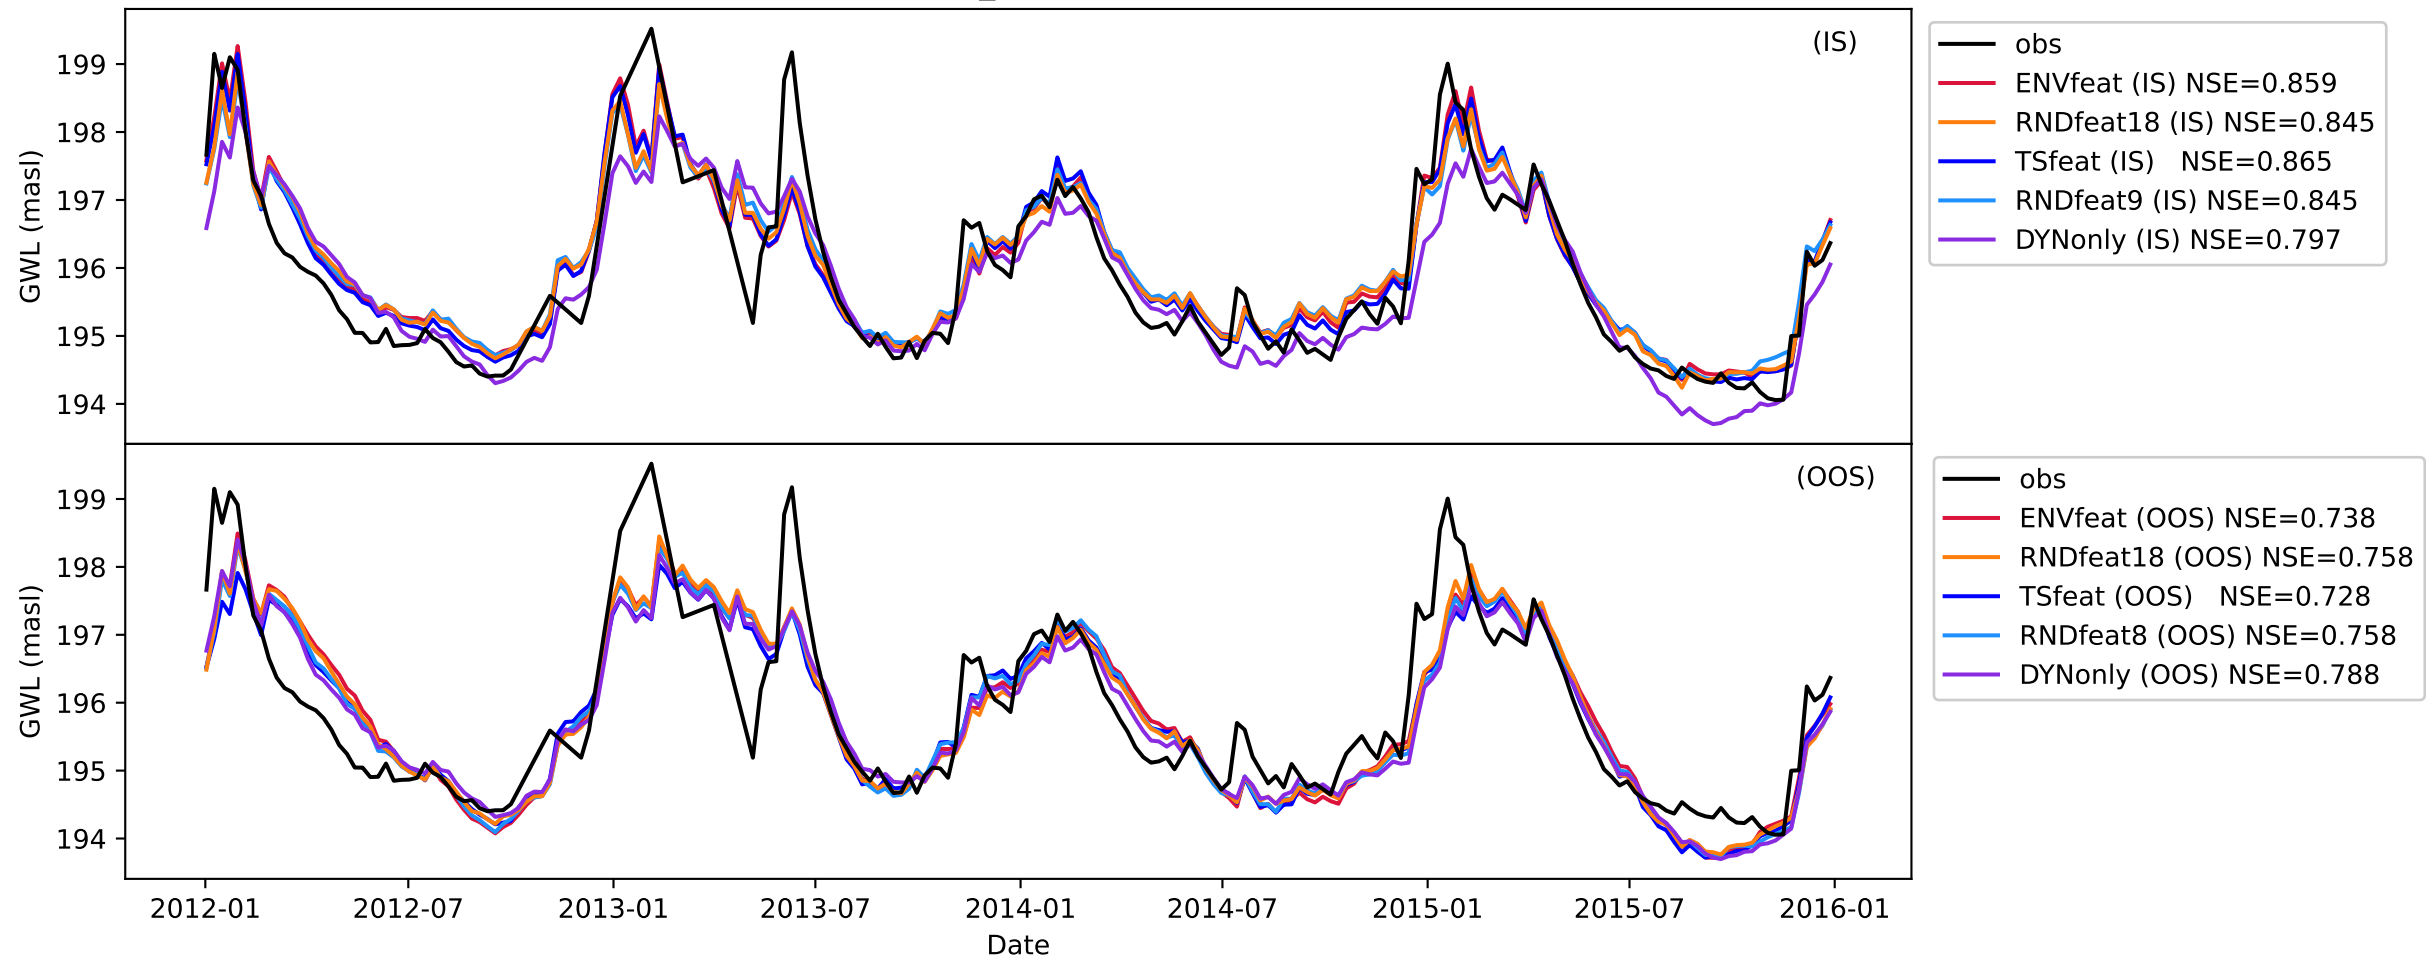

## HE\_6253

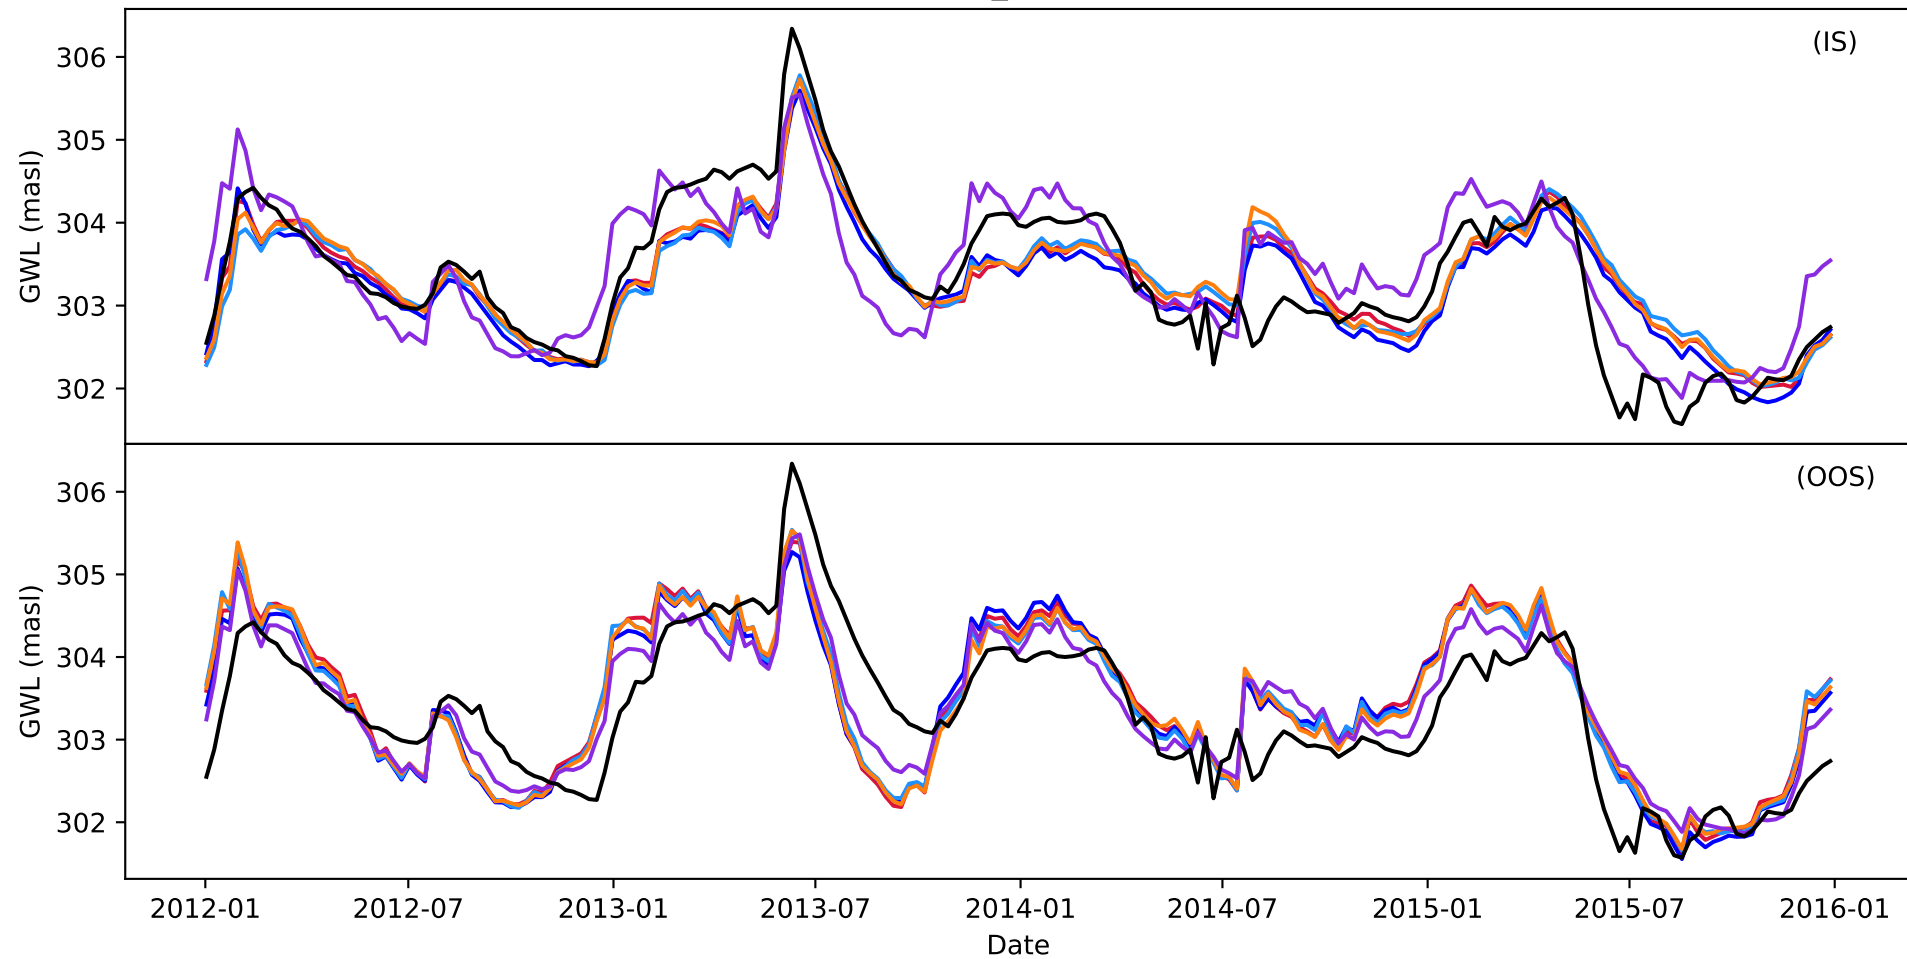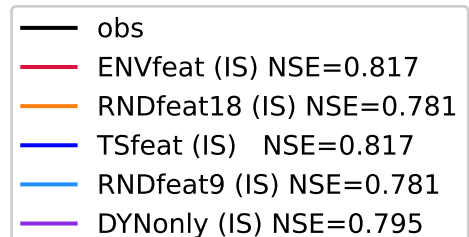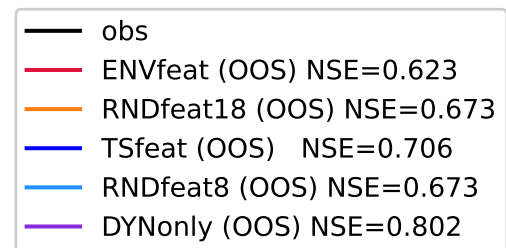

HE\_7824

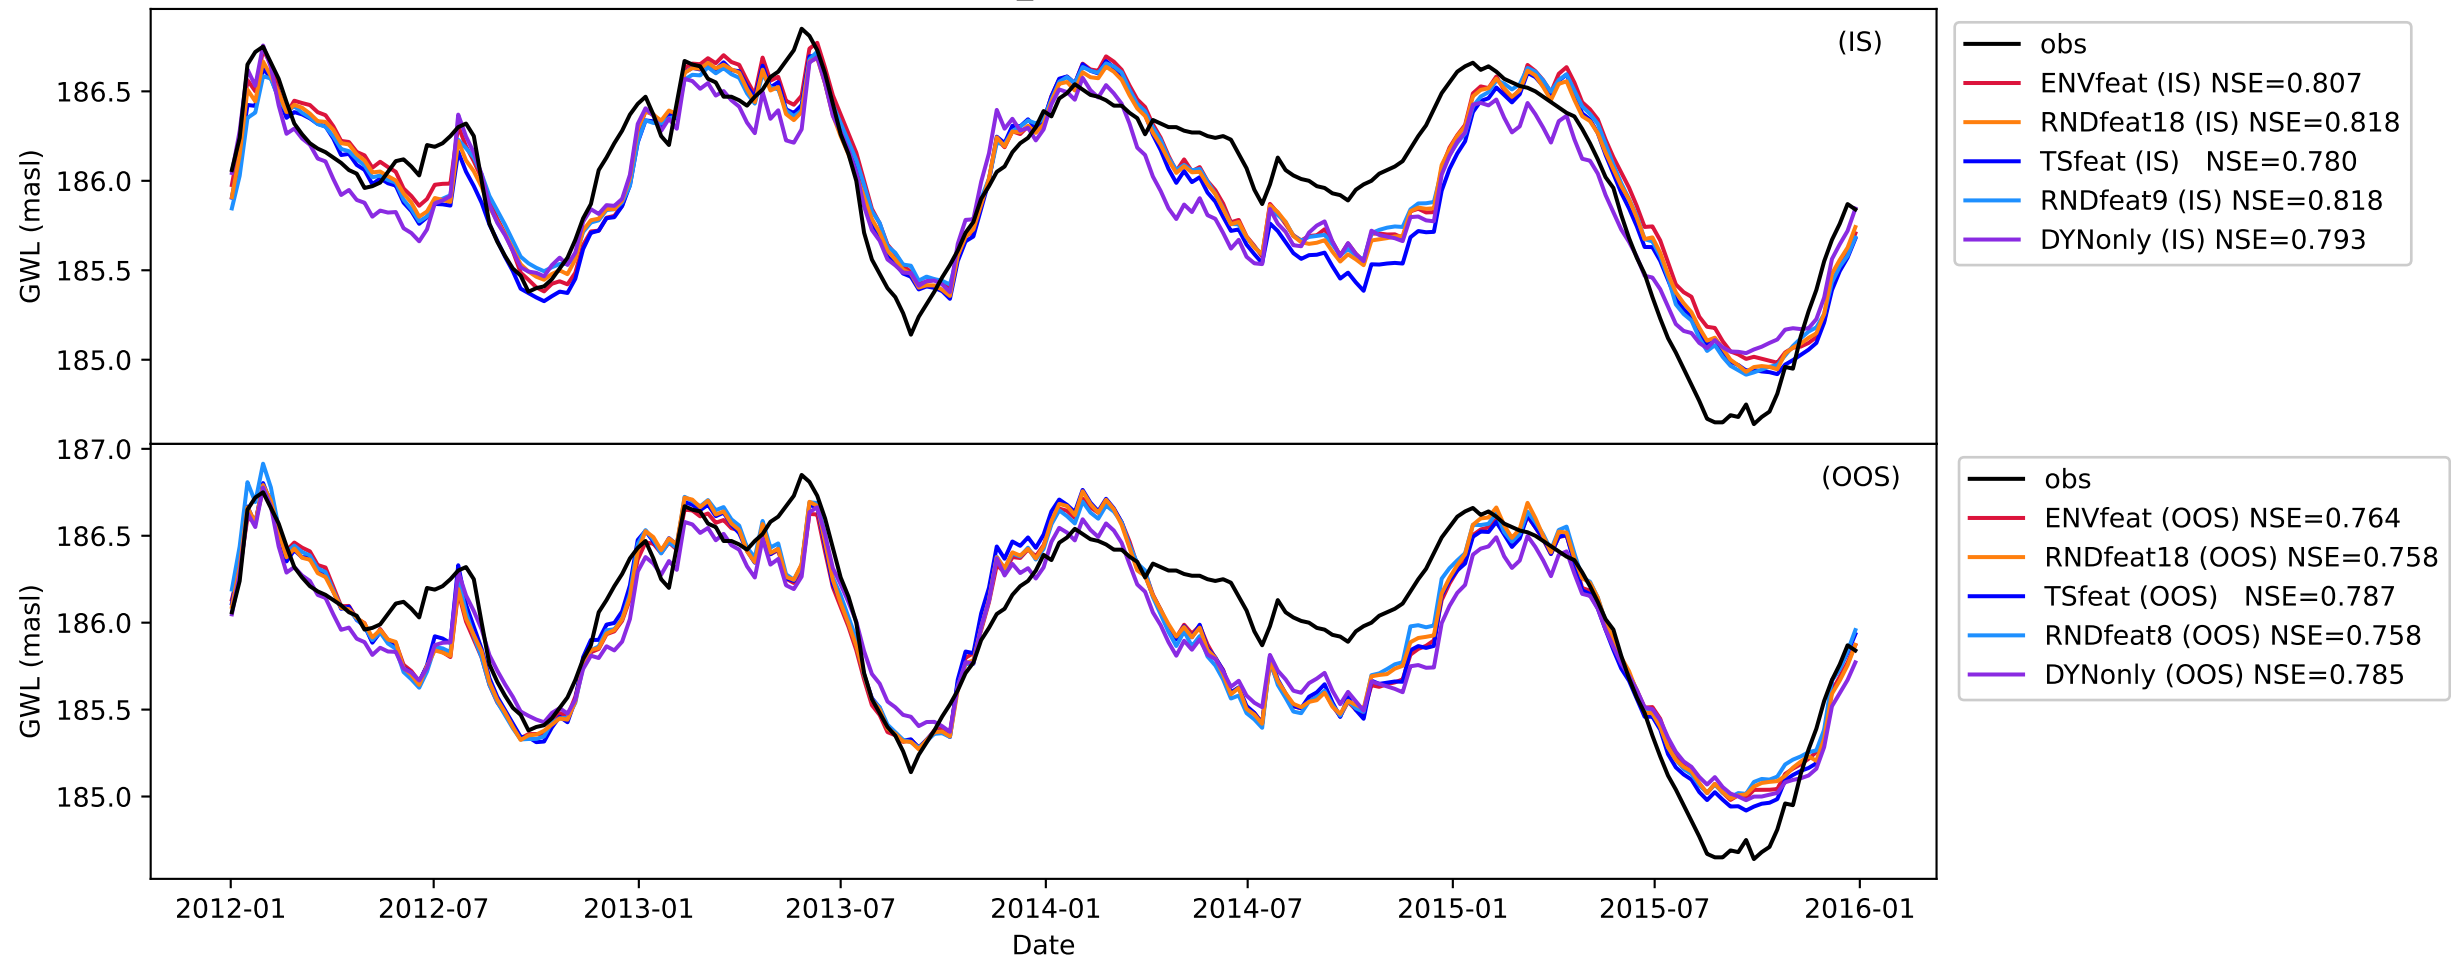

## HE\_10319

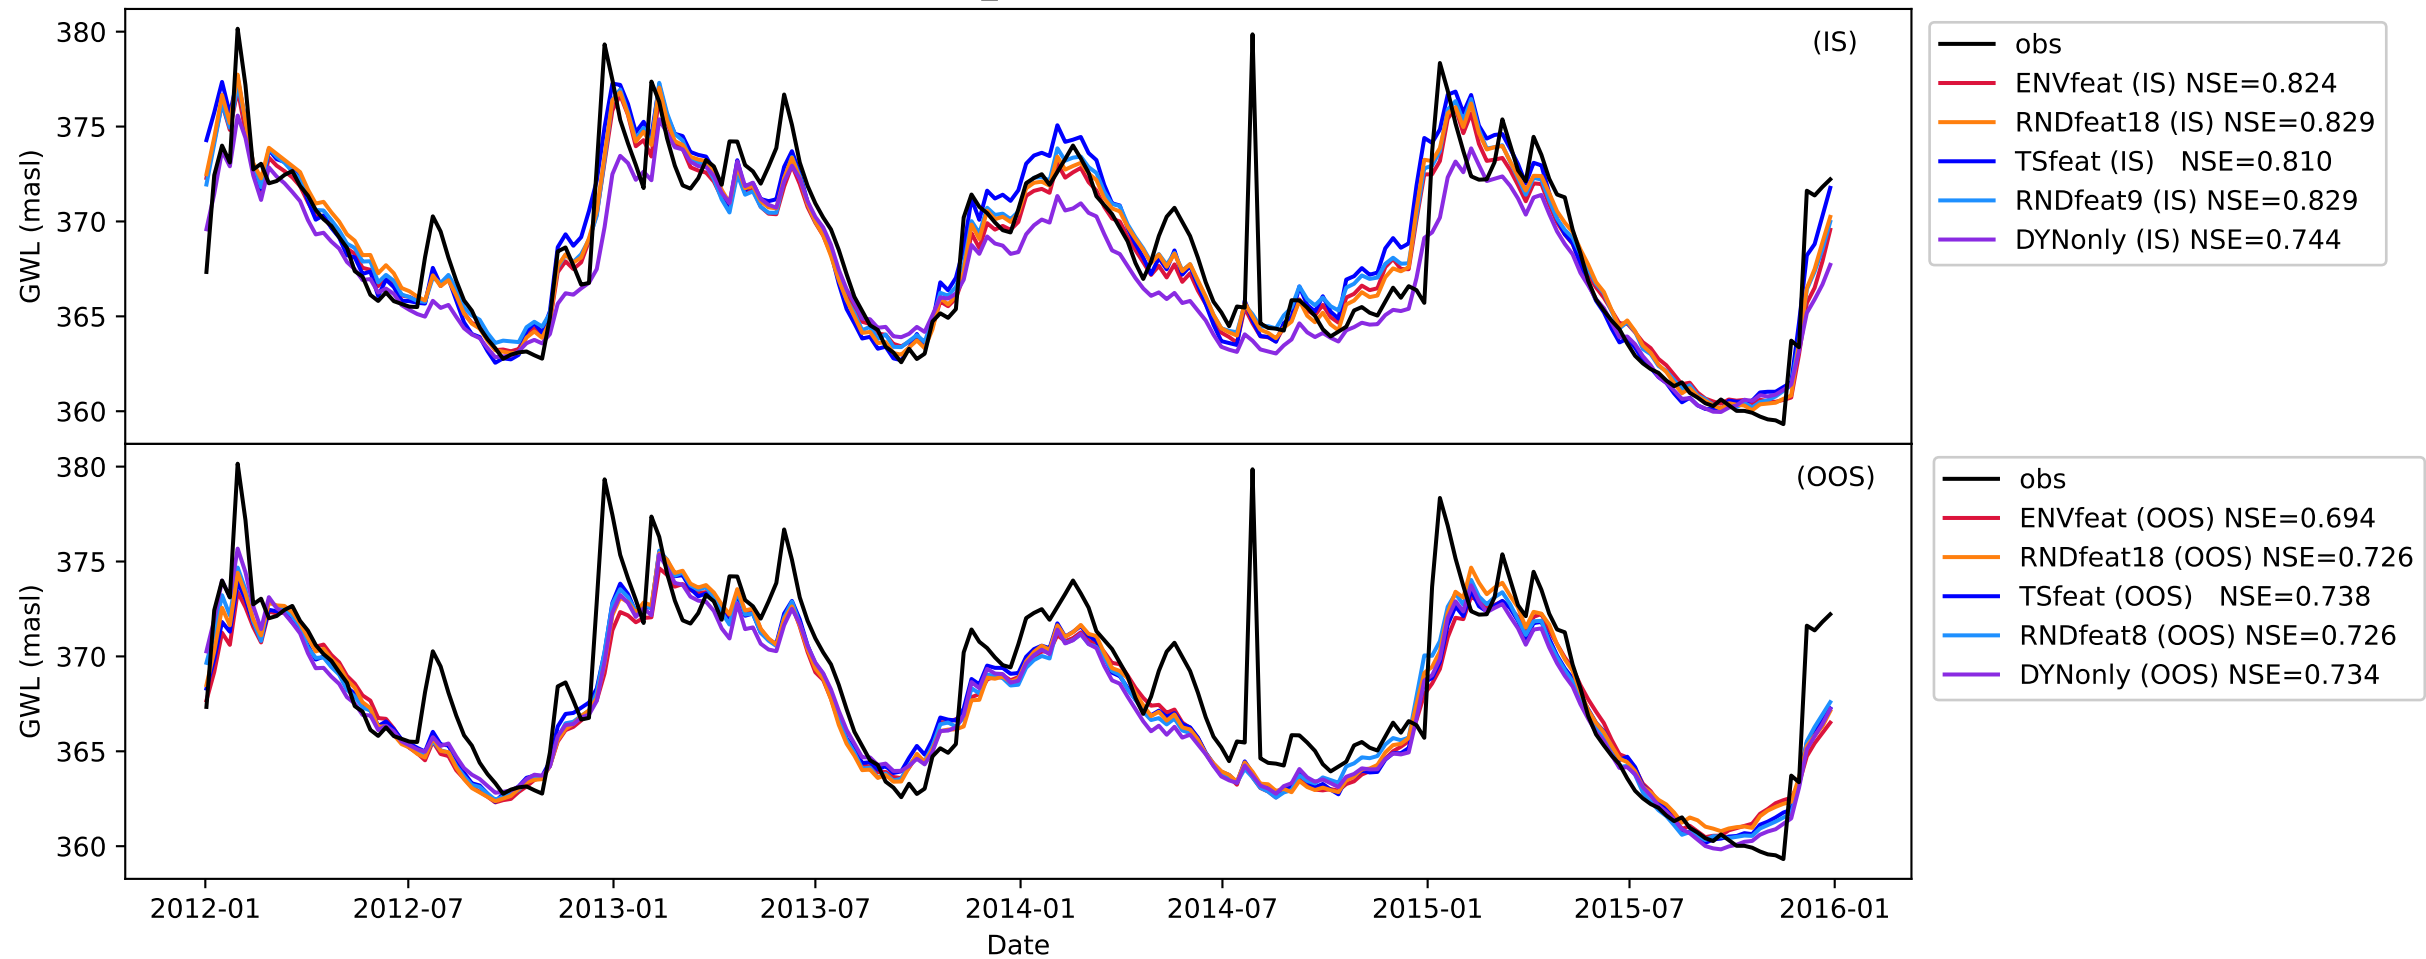

## HE\_11781

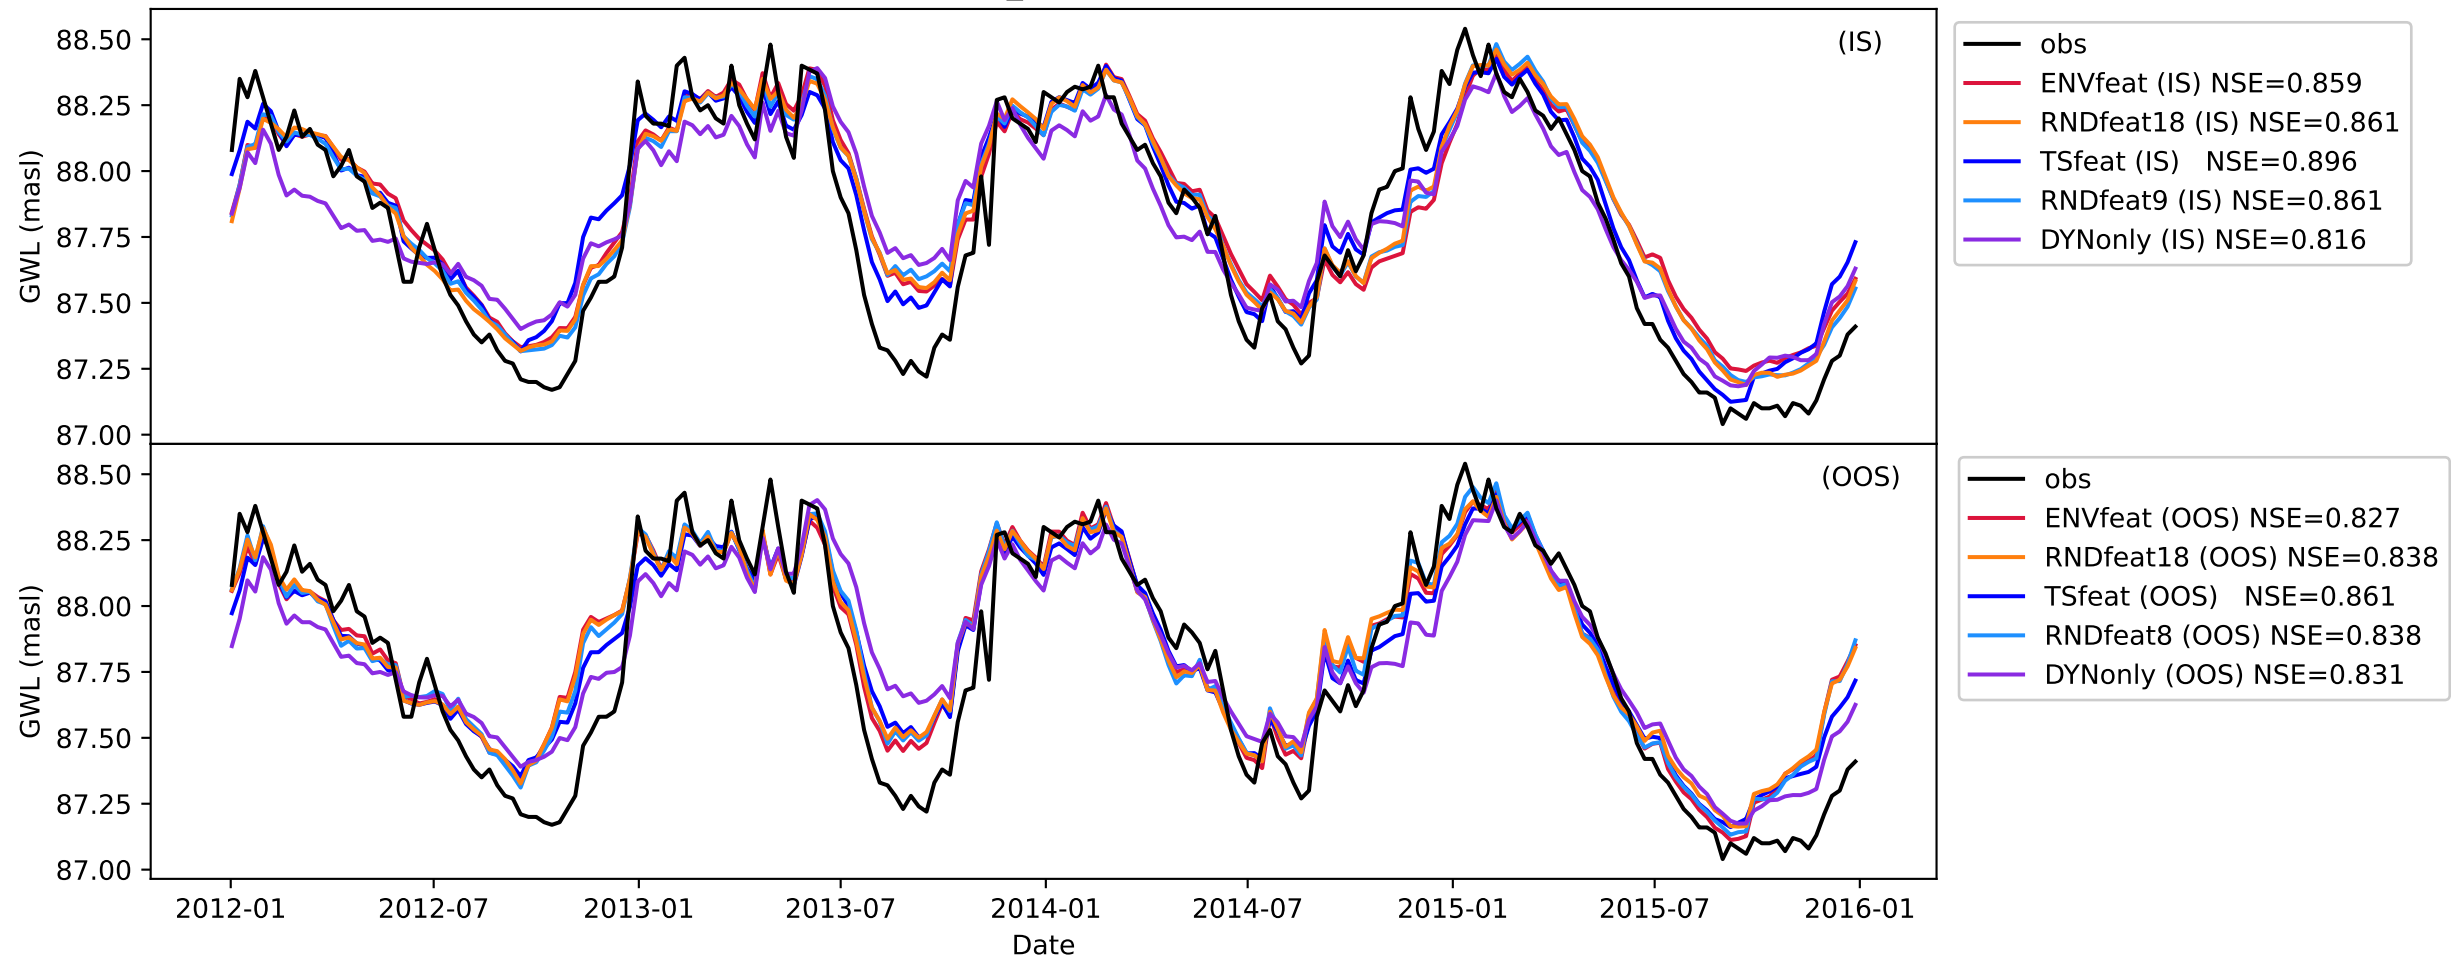

## HE\_12117

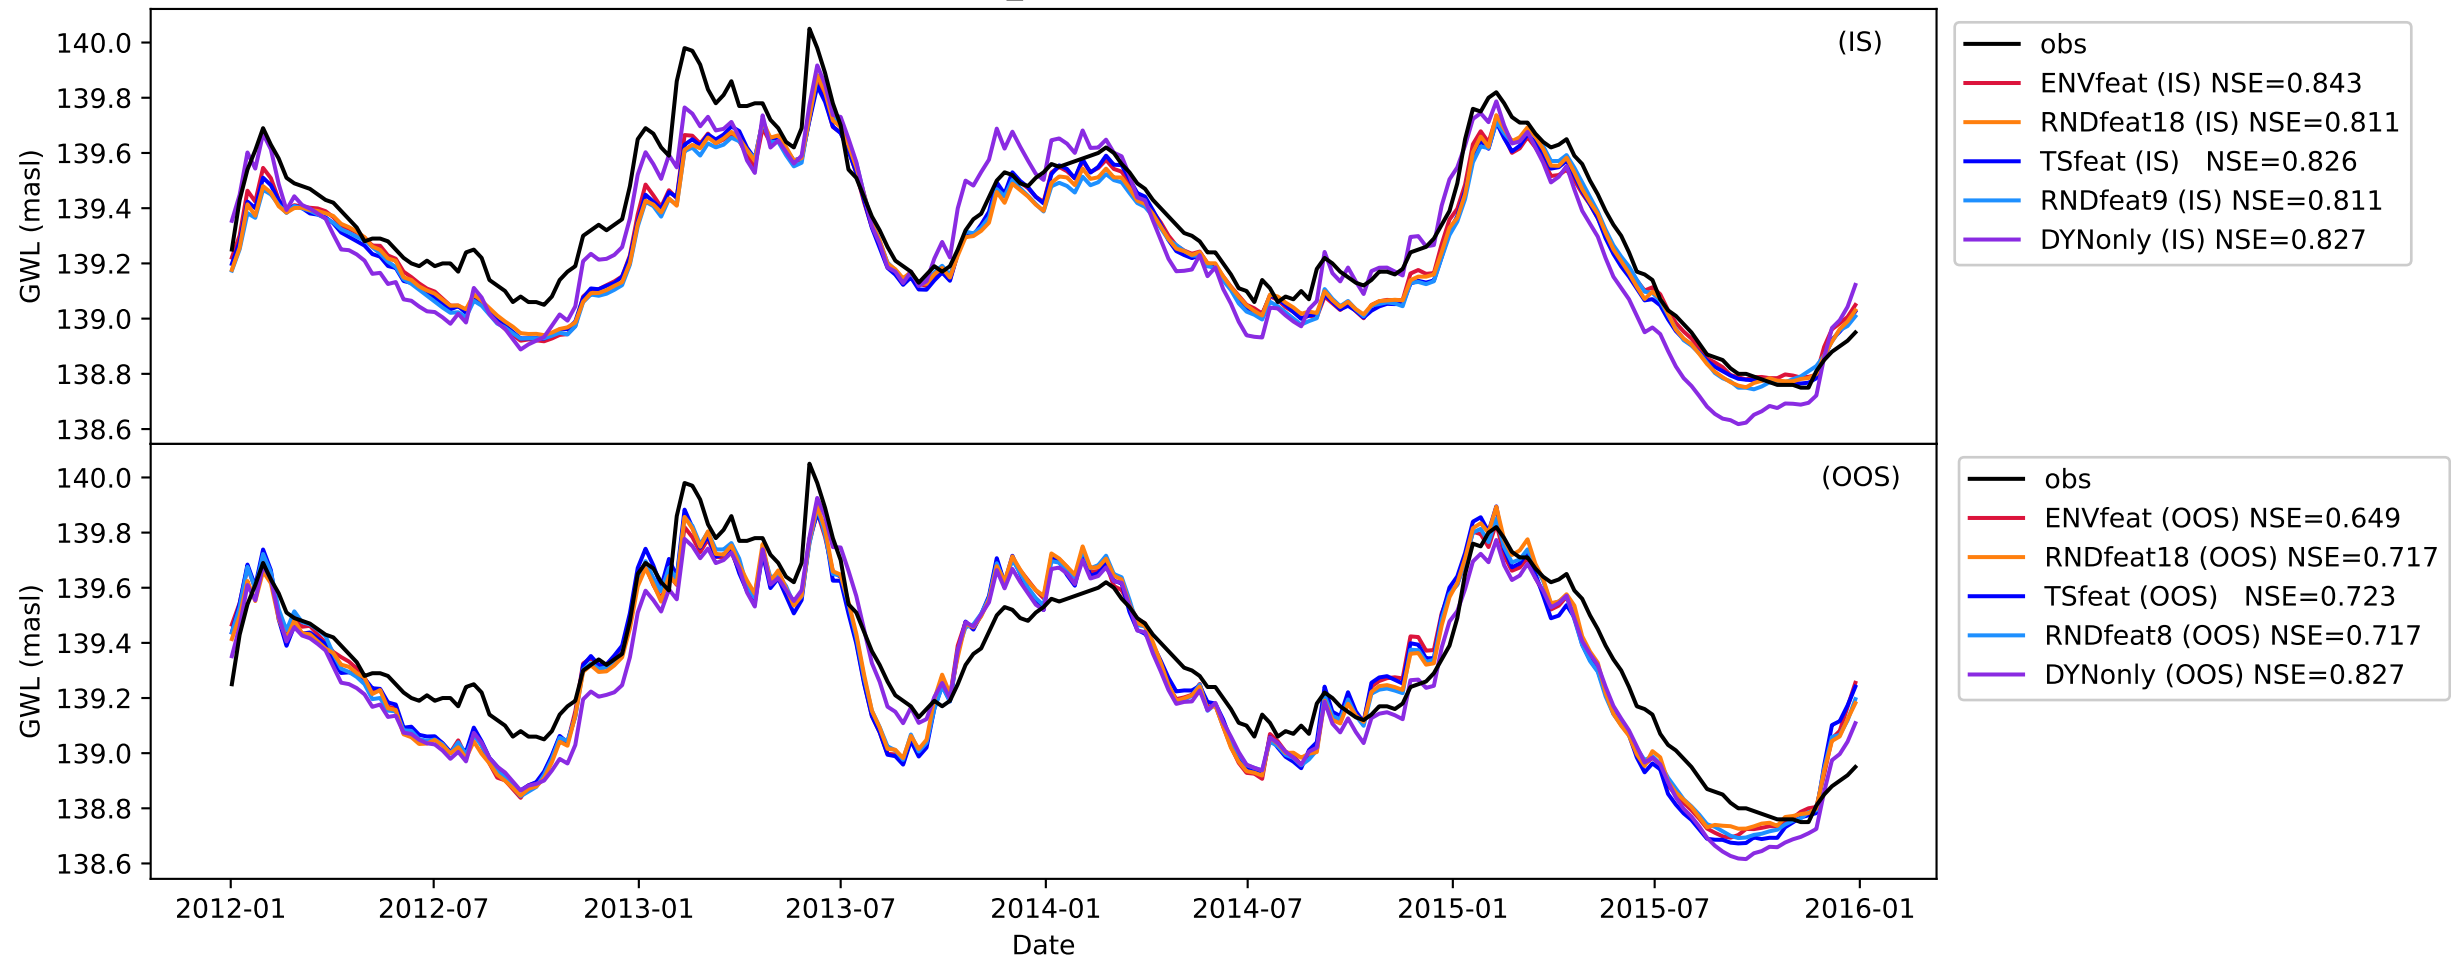



## HE\_14293

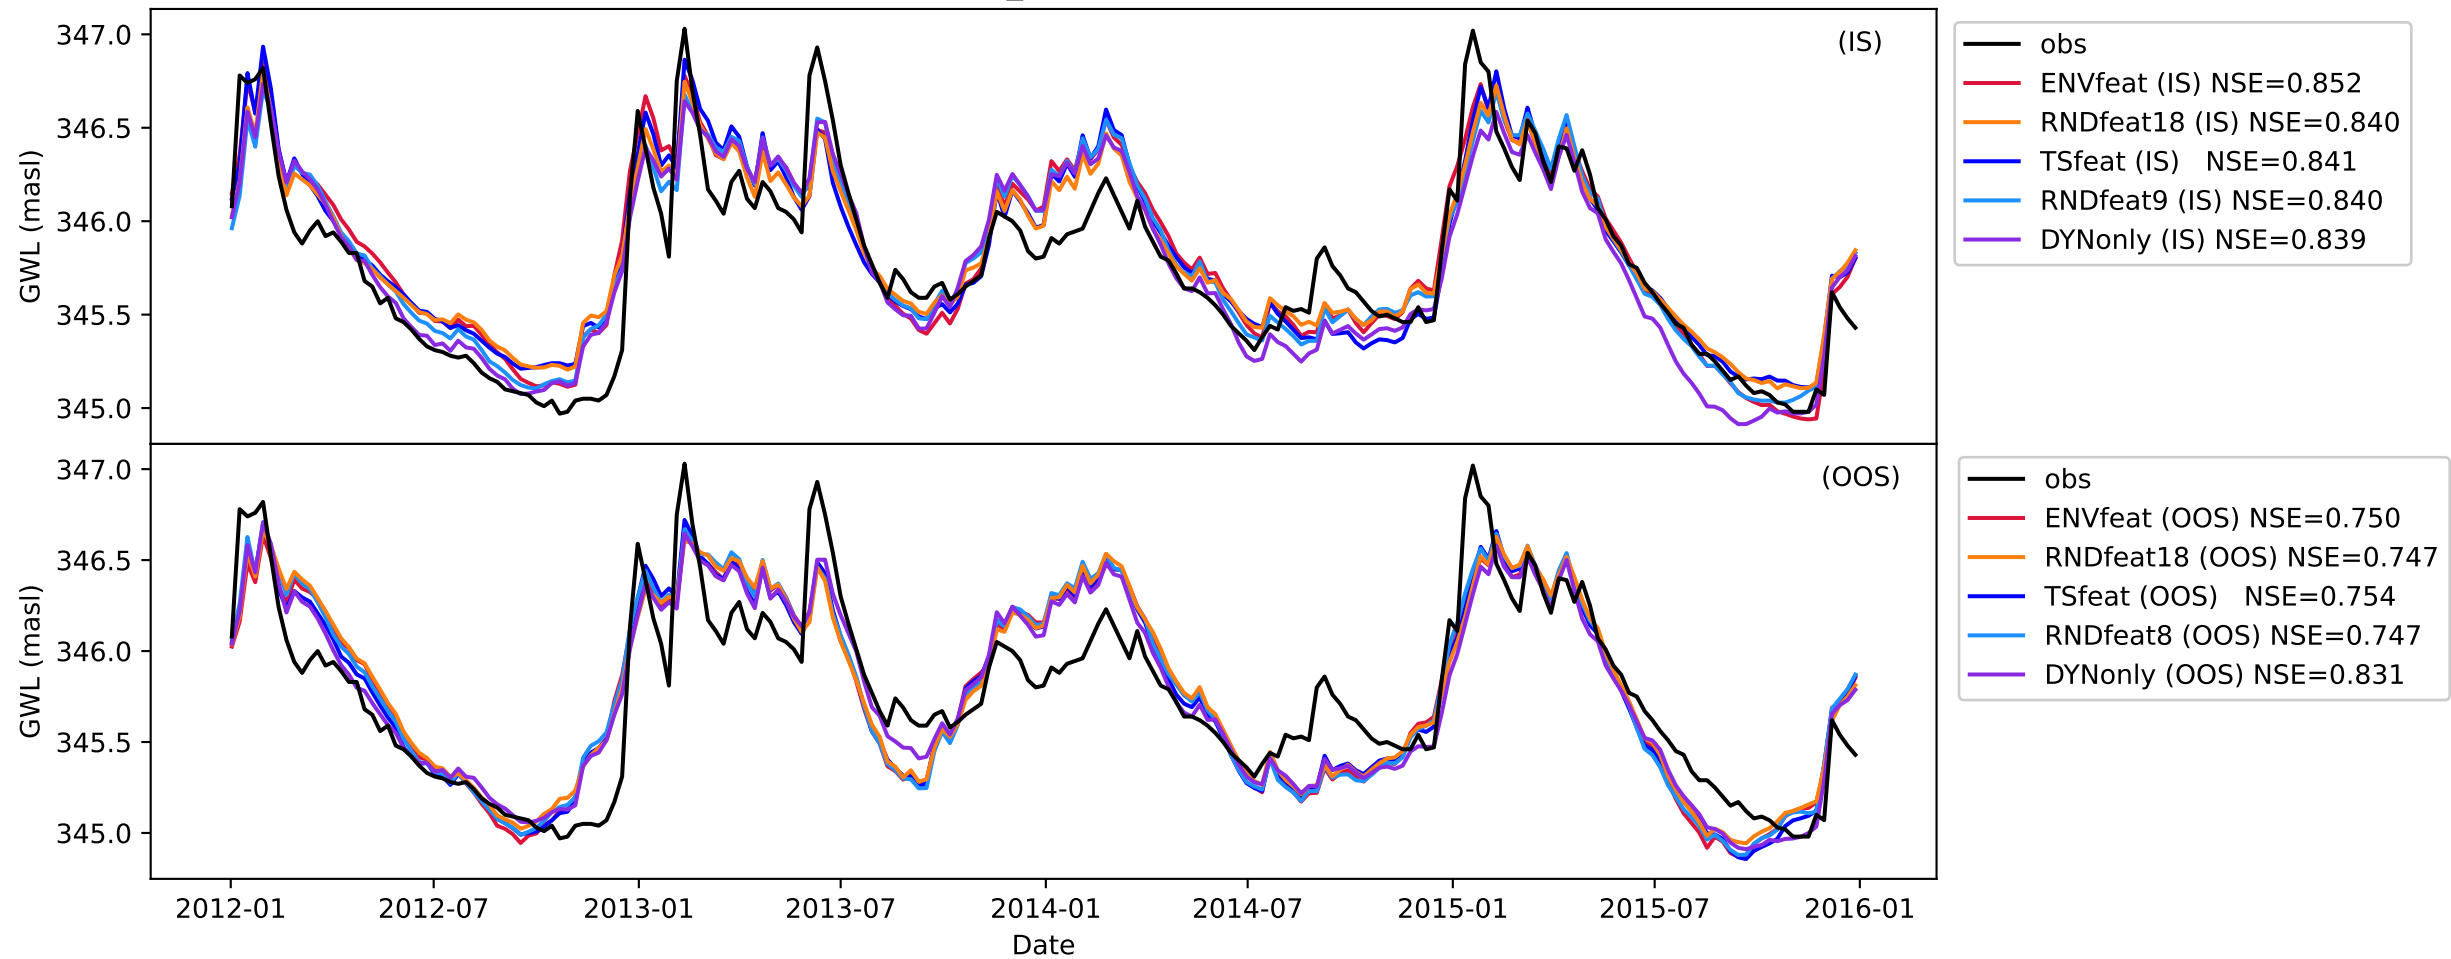

## HE\_14297

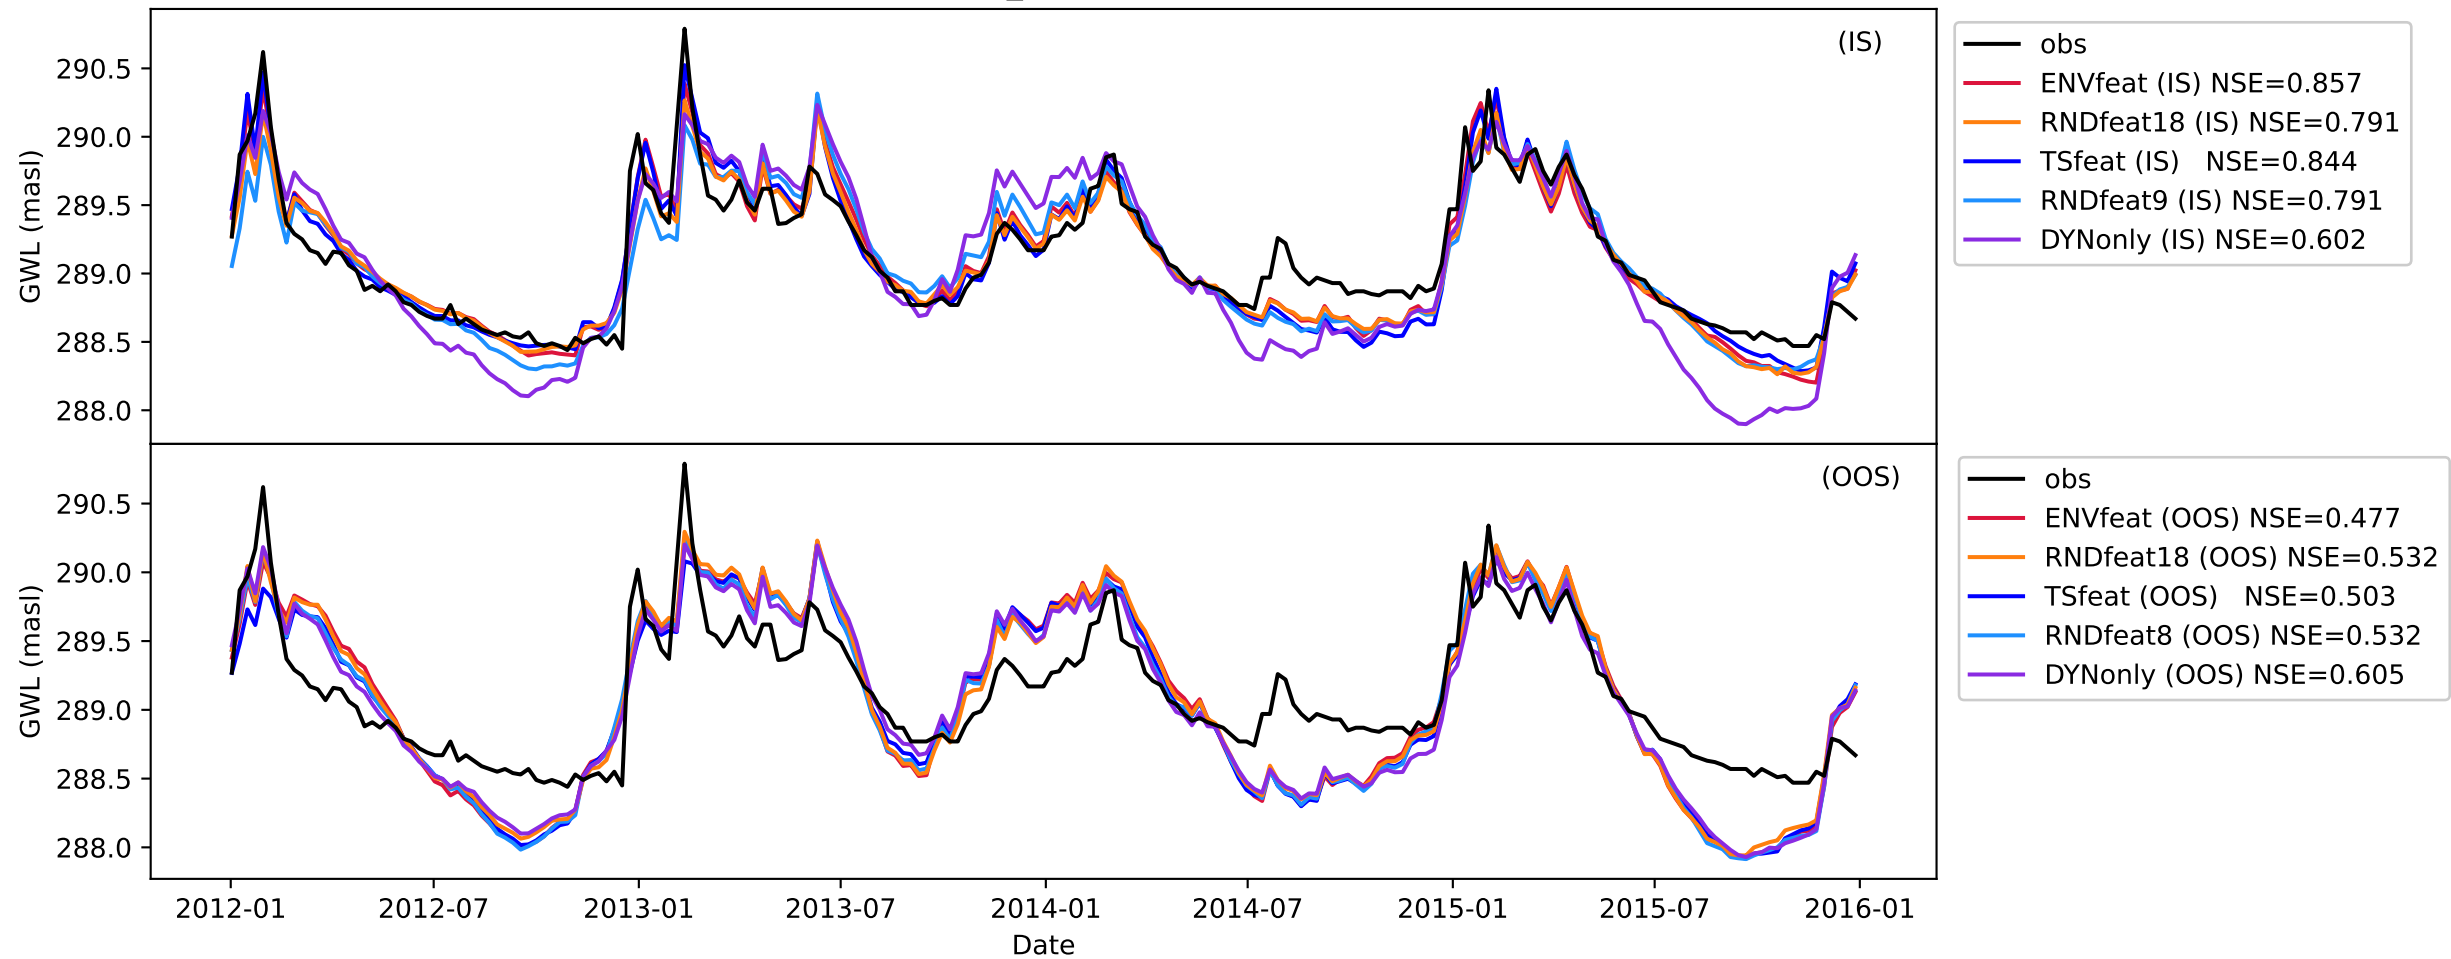

NI\_9700020

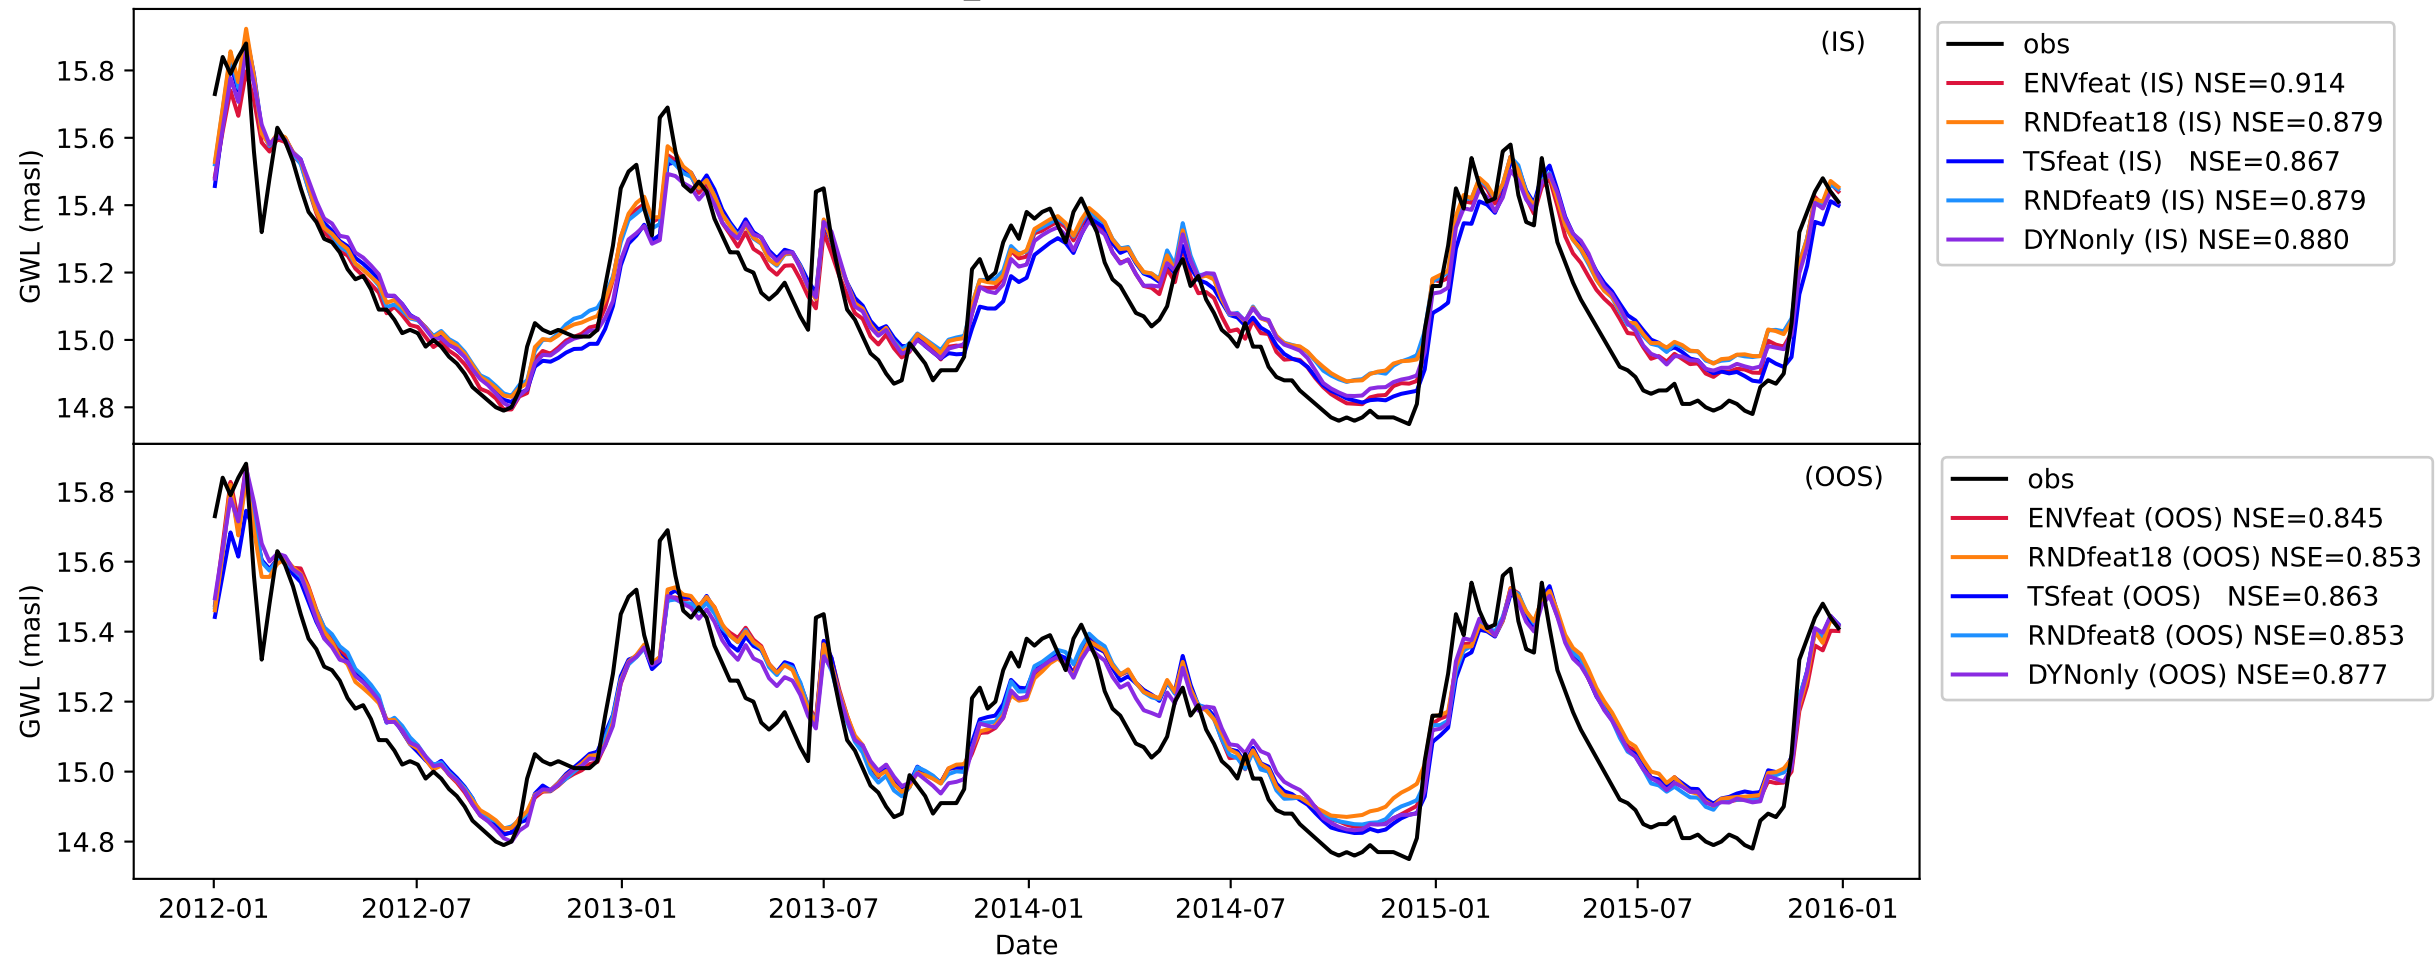

NI\_9700080

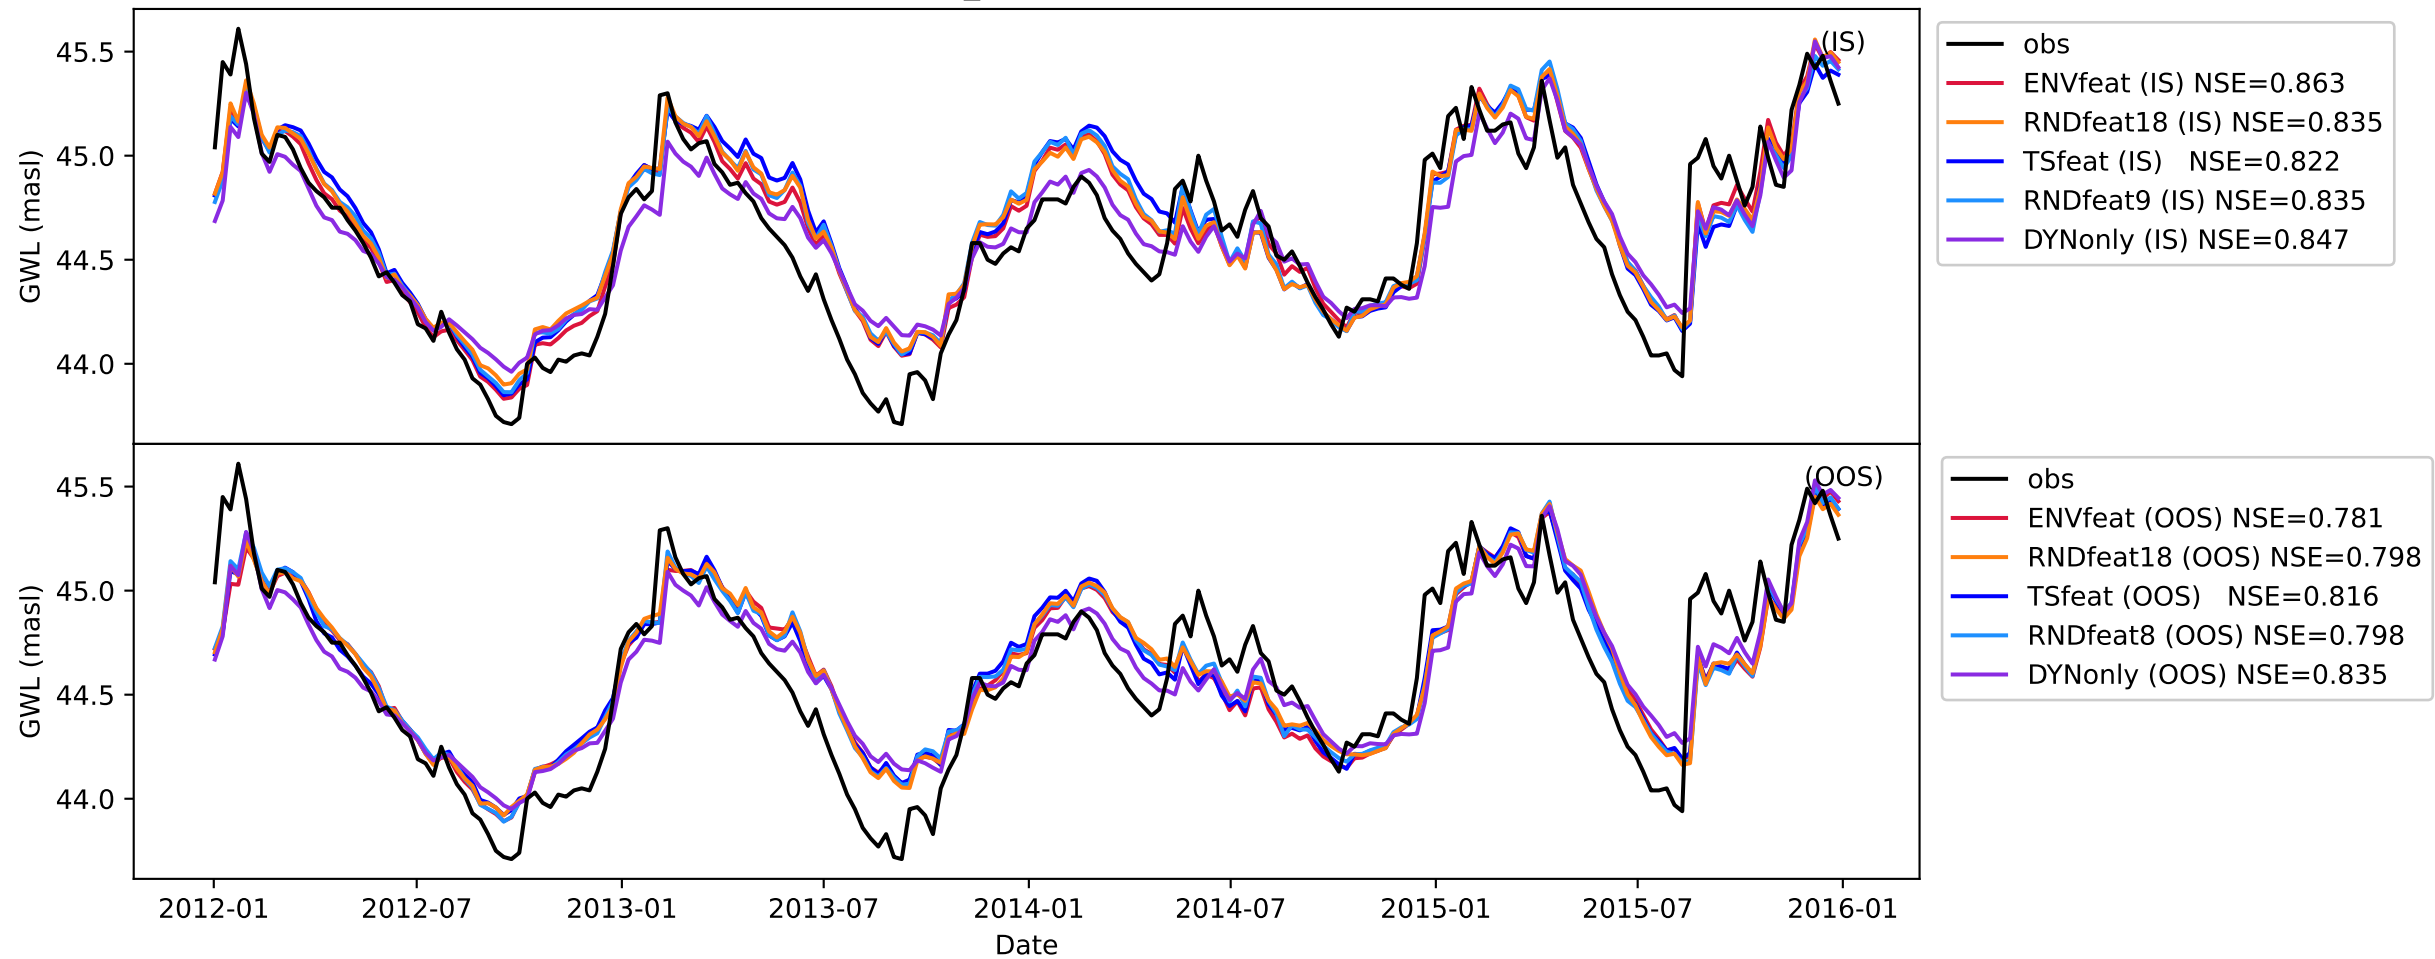

NI\_9700159

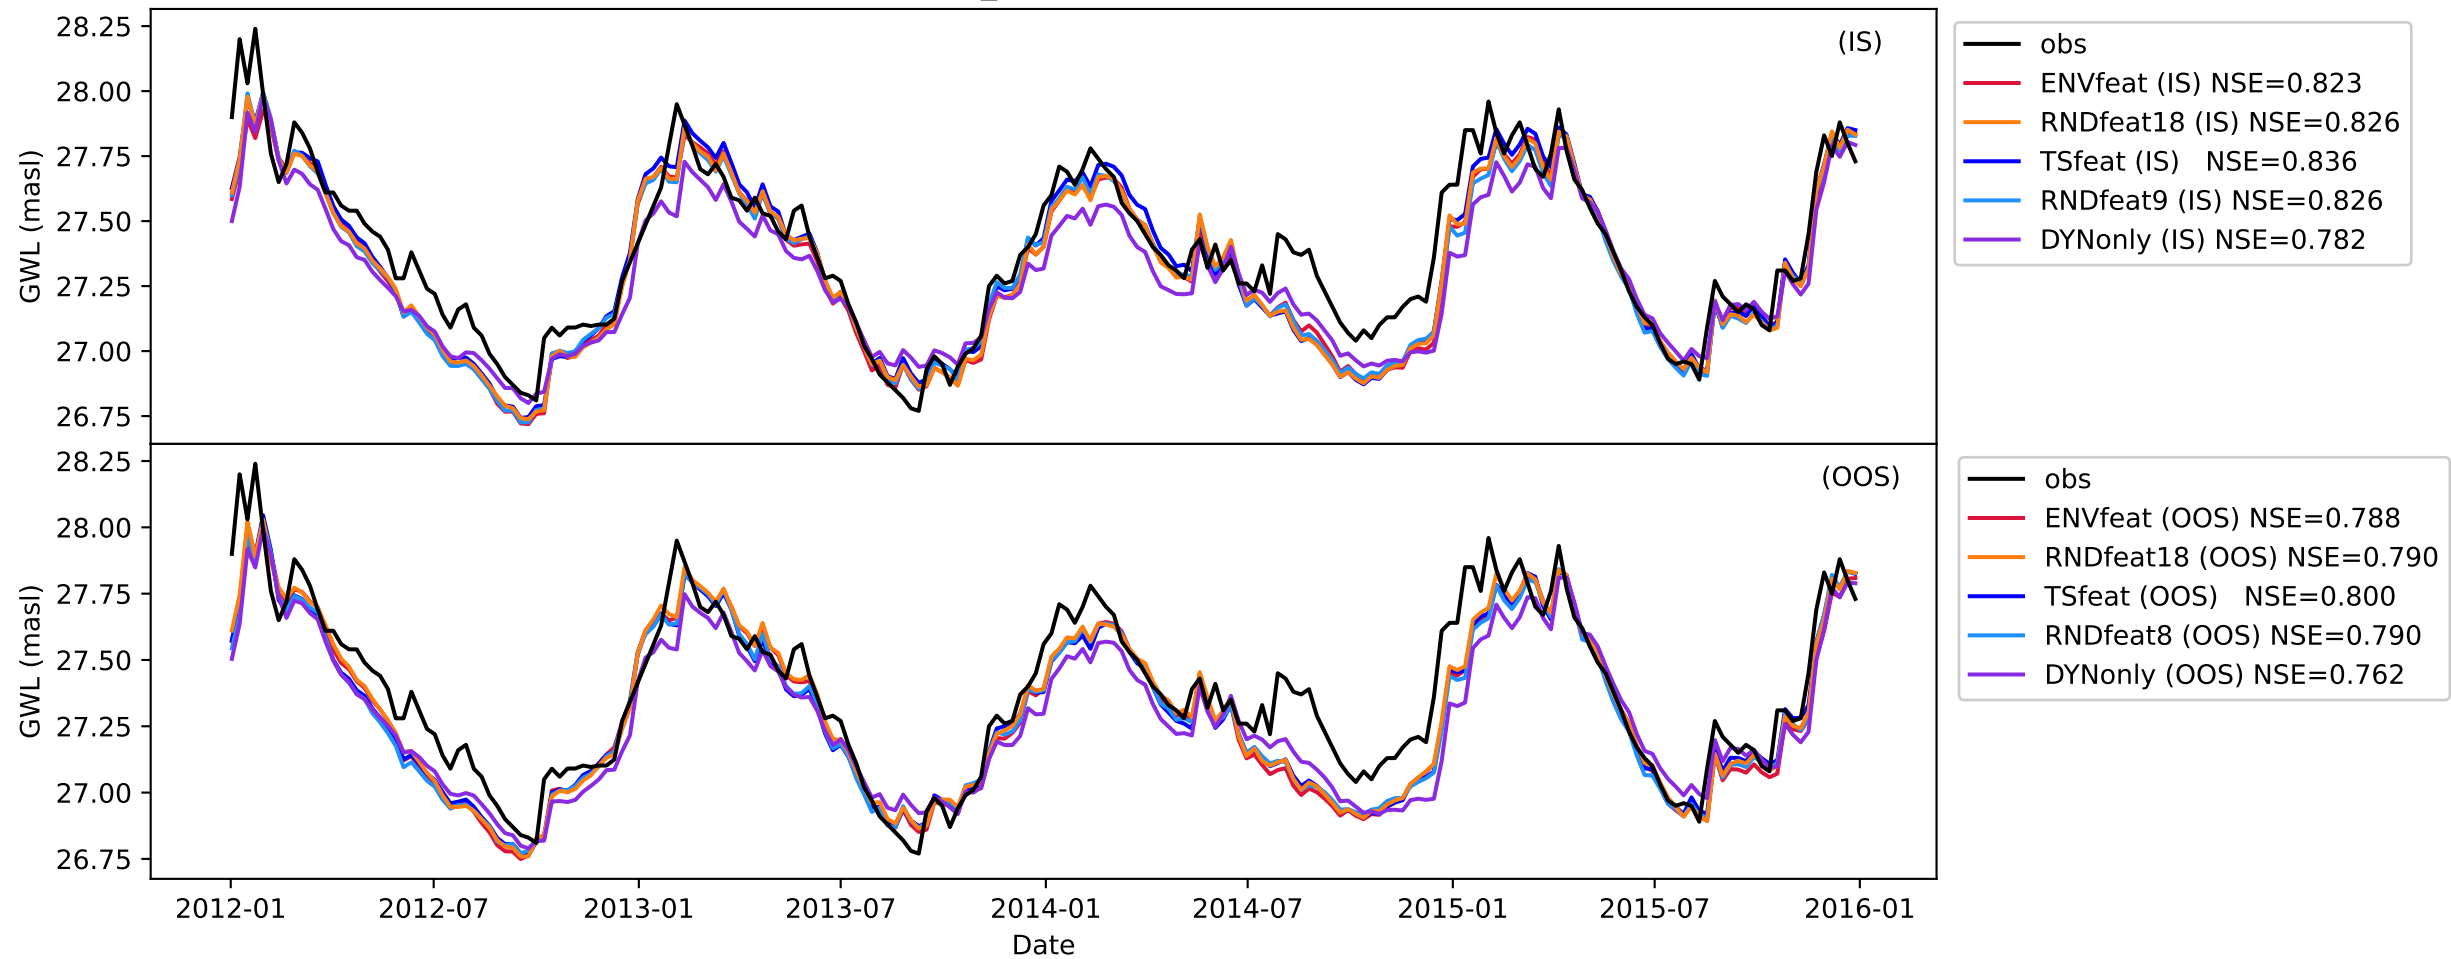

NI\_9840391

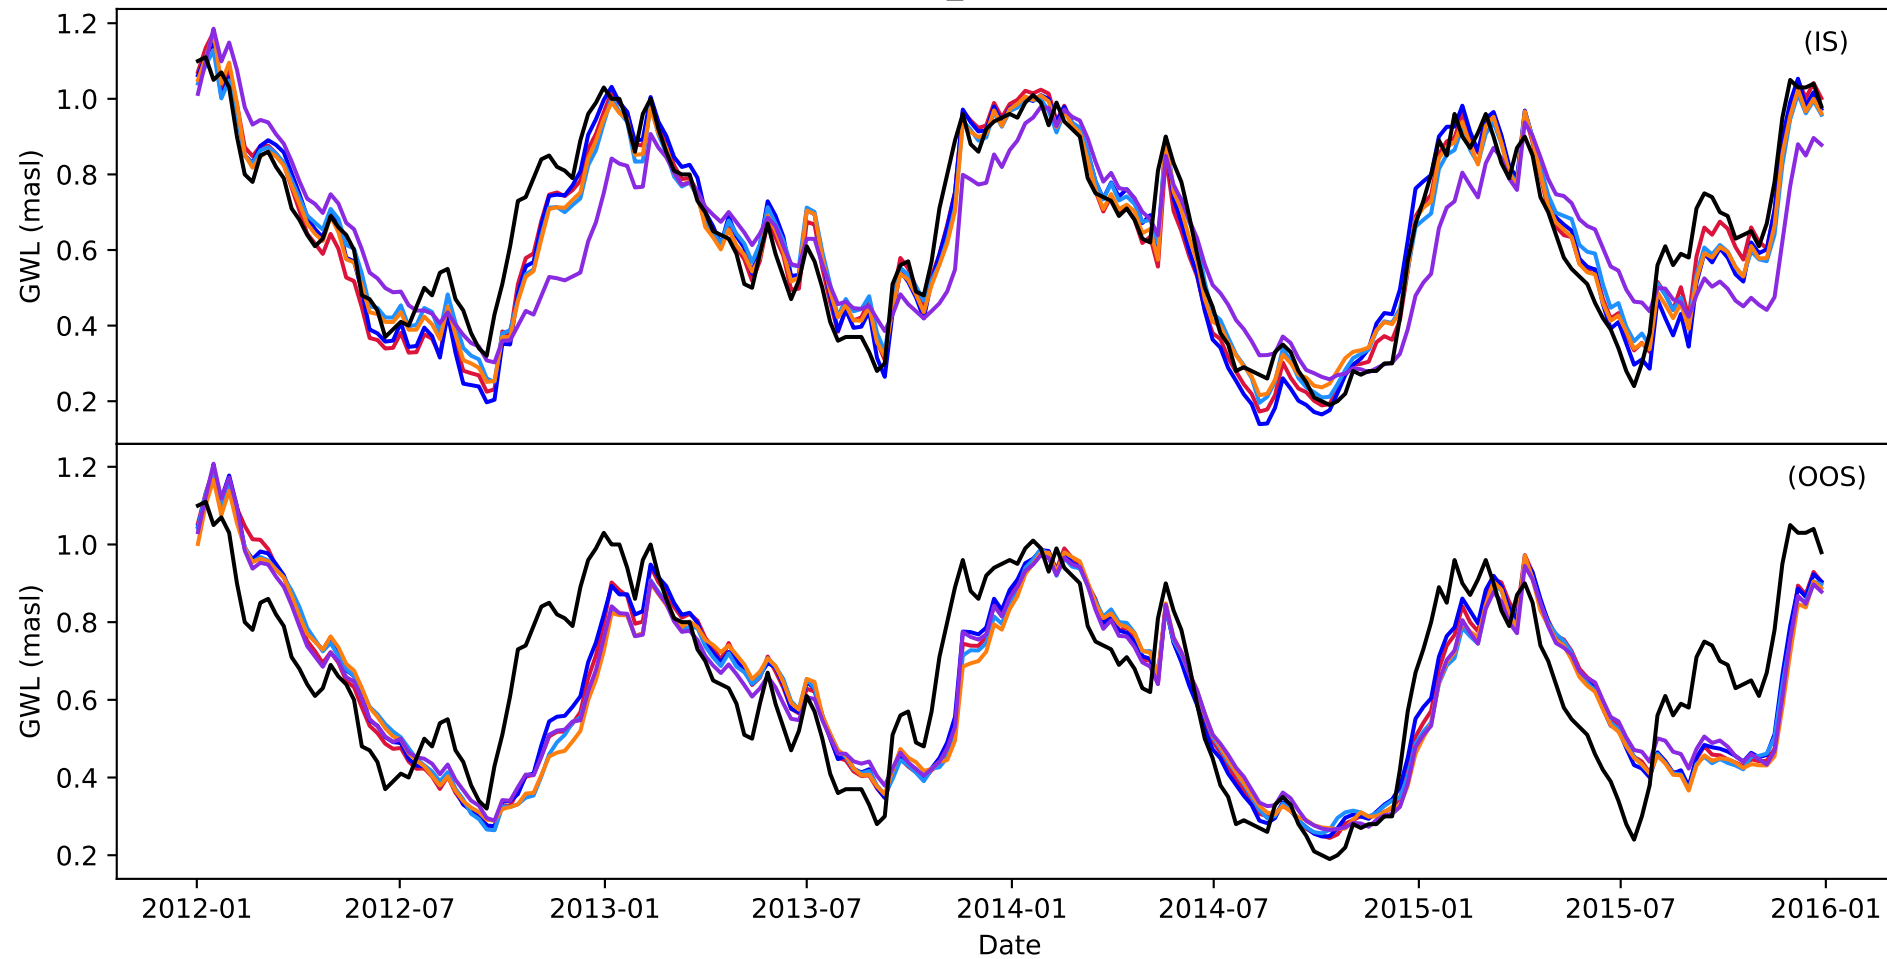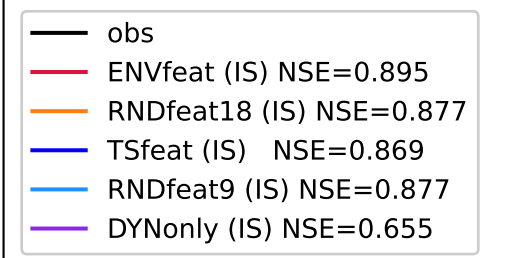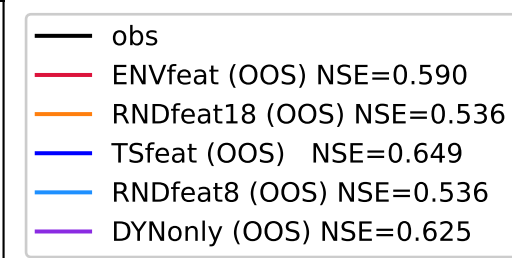

NI\_9840901

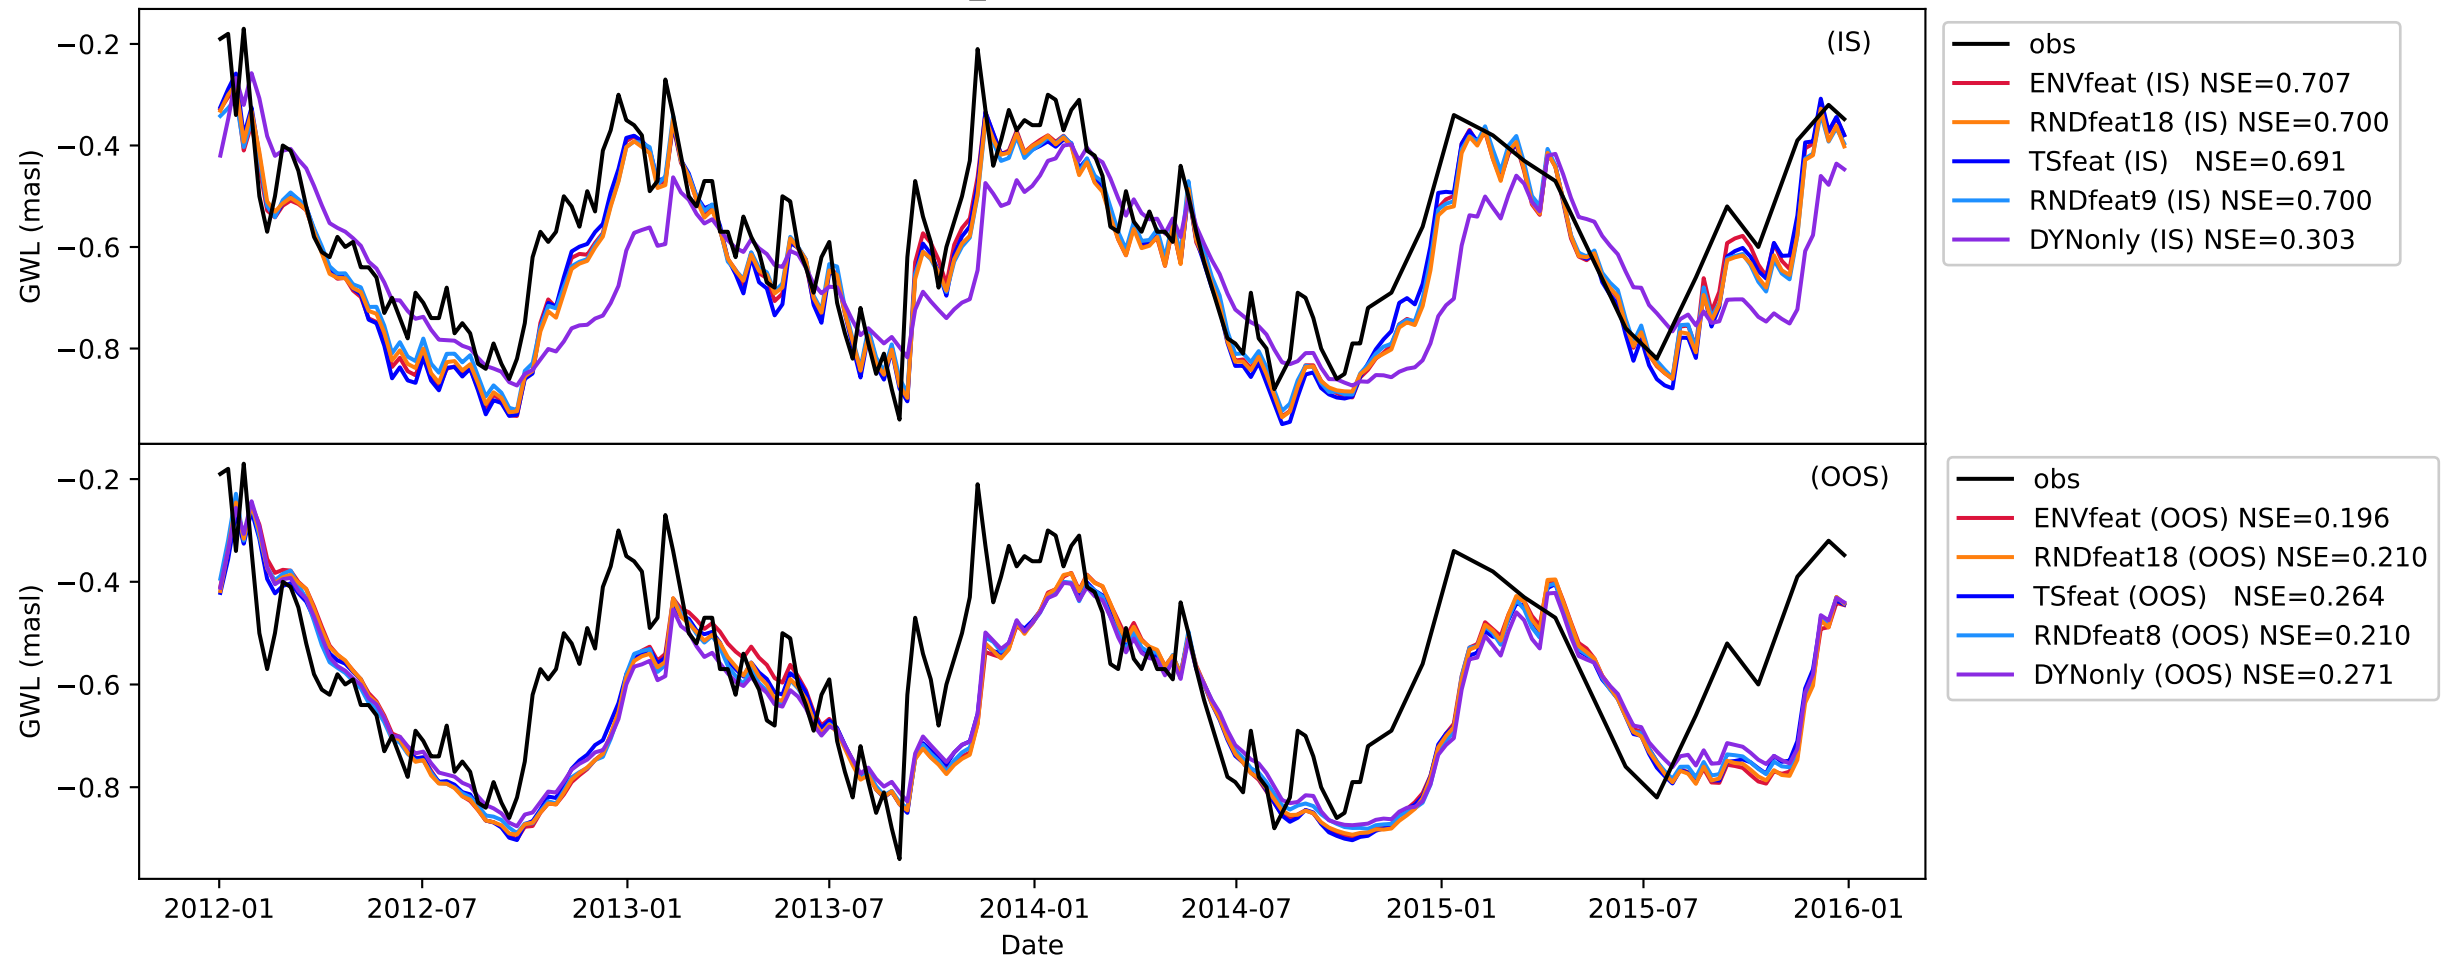

NI\_9853172

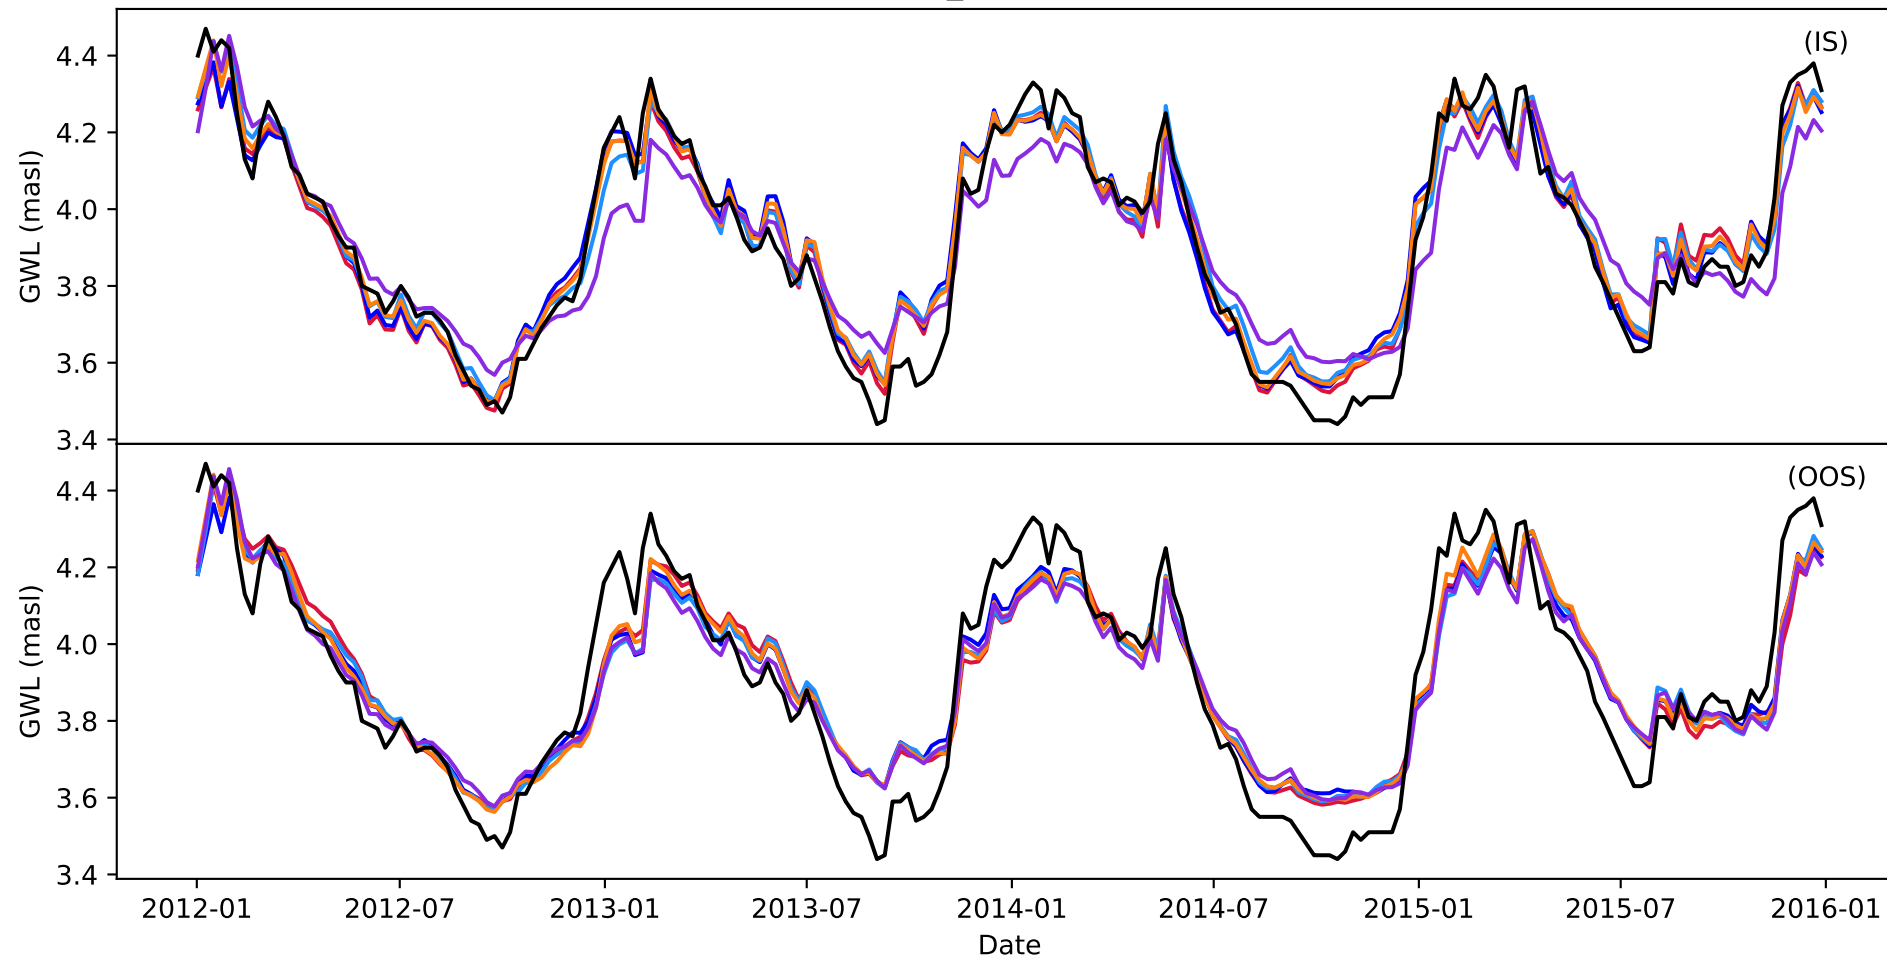

- obs
- ENVfeat (IS) NSE=0.939
- RNDfeat18 (IS) NSE=0.936
- TSfeat (IS) NSE=0.935
- RNDfeat9 (IS) NSE=0.936
- DYNonly (IS) NSE=0.858

- obs
- ENVfeat (OOS) NSE=0.861
- RNDfeat18 (OOS) NSE=0.851
- TSfeat (OOS) NSE=0.879
- RNDfeat8 (OOS) NSE=0.851
- DYNonly (OOS) NSE=0.861



NI\_40000175

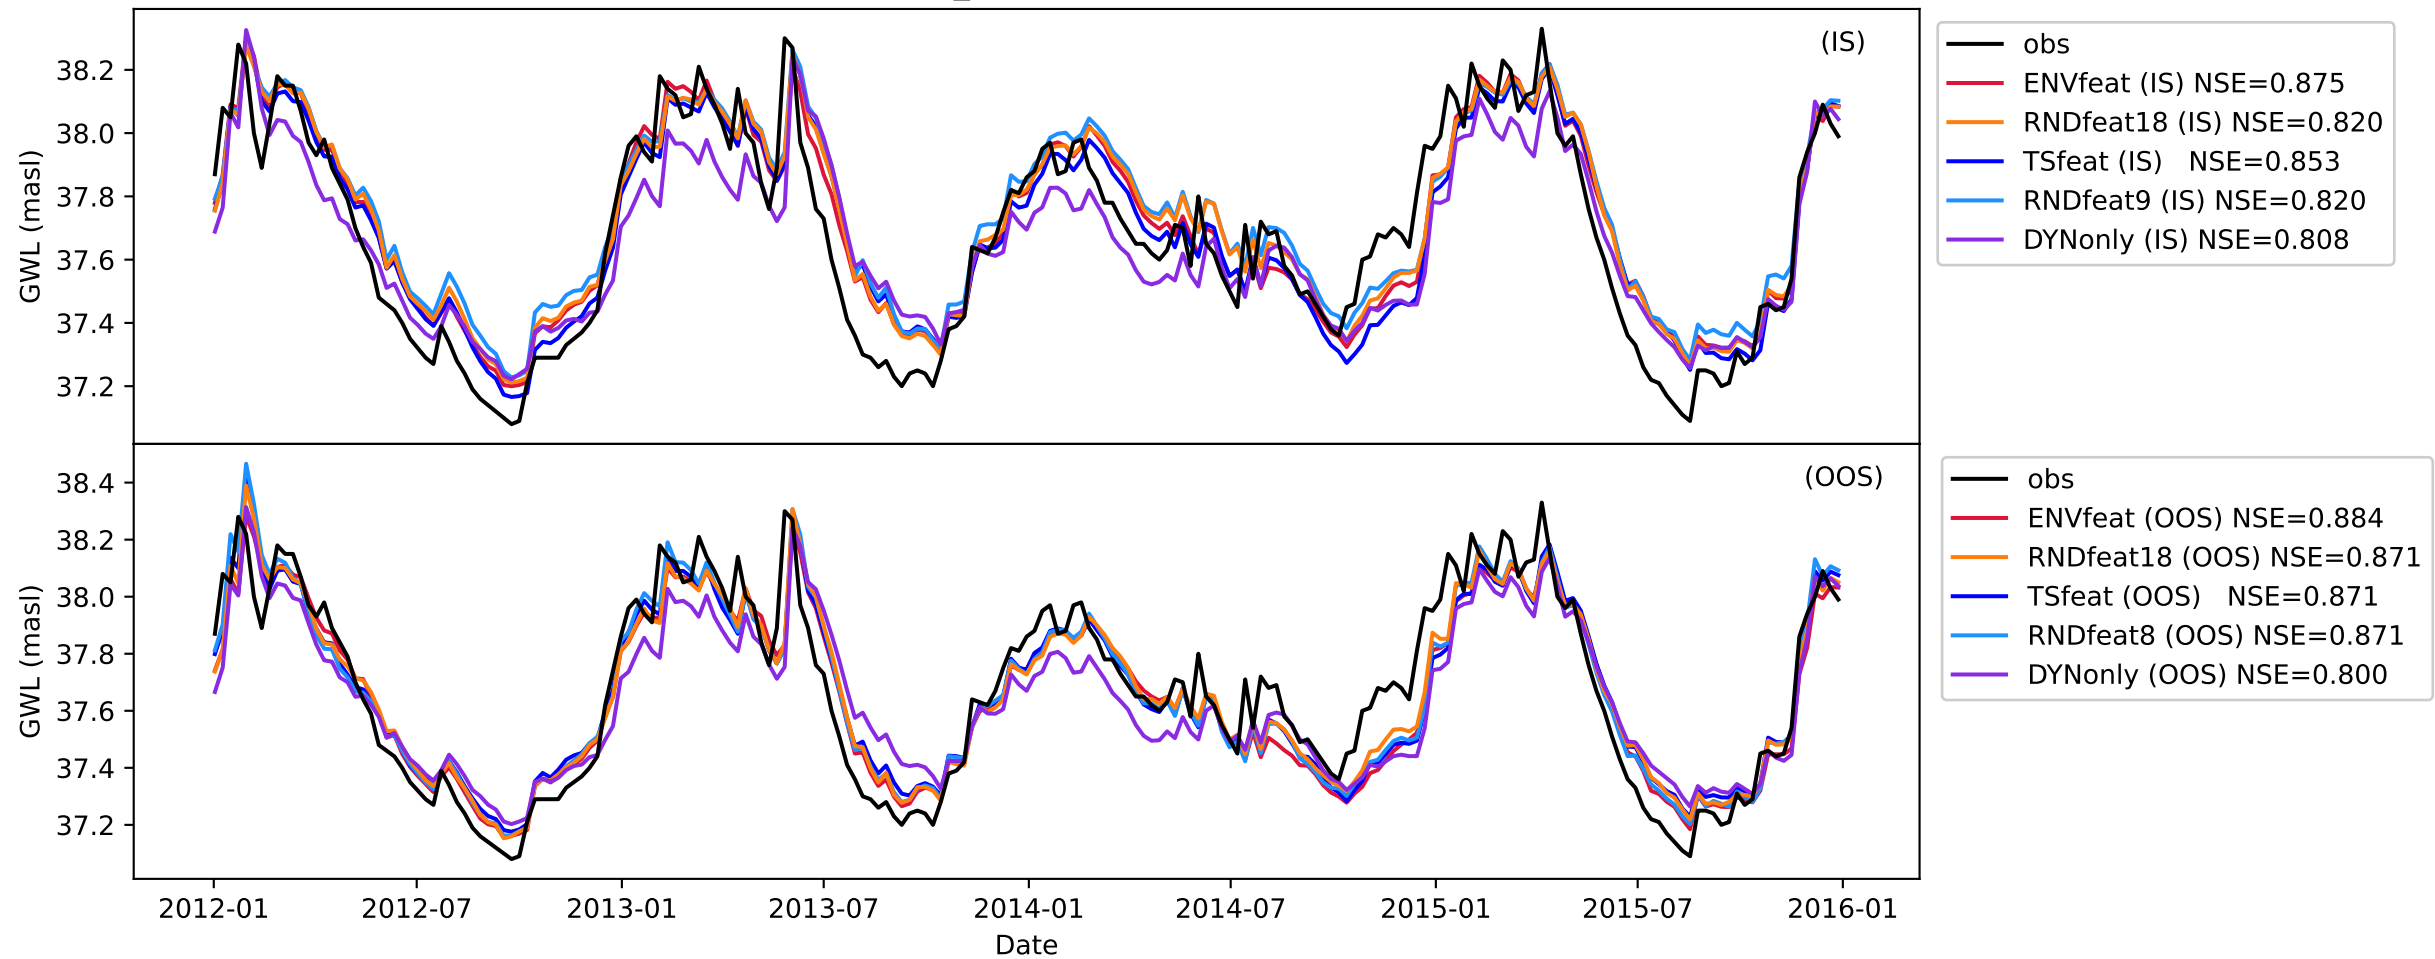

# NI\_40000233

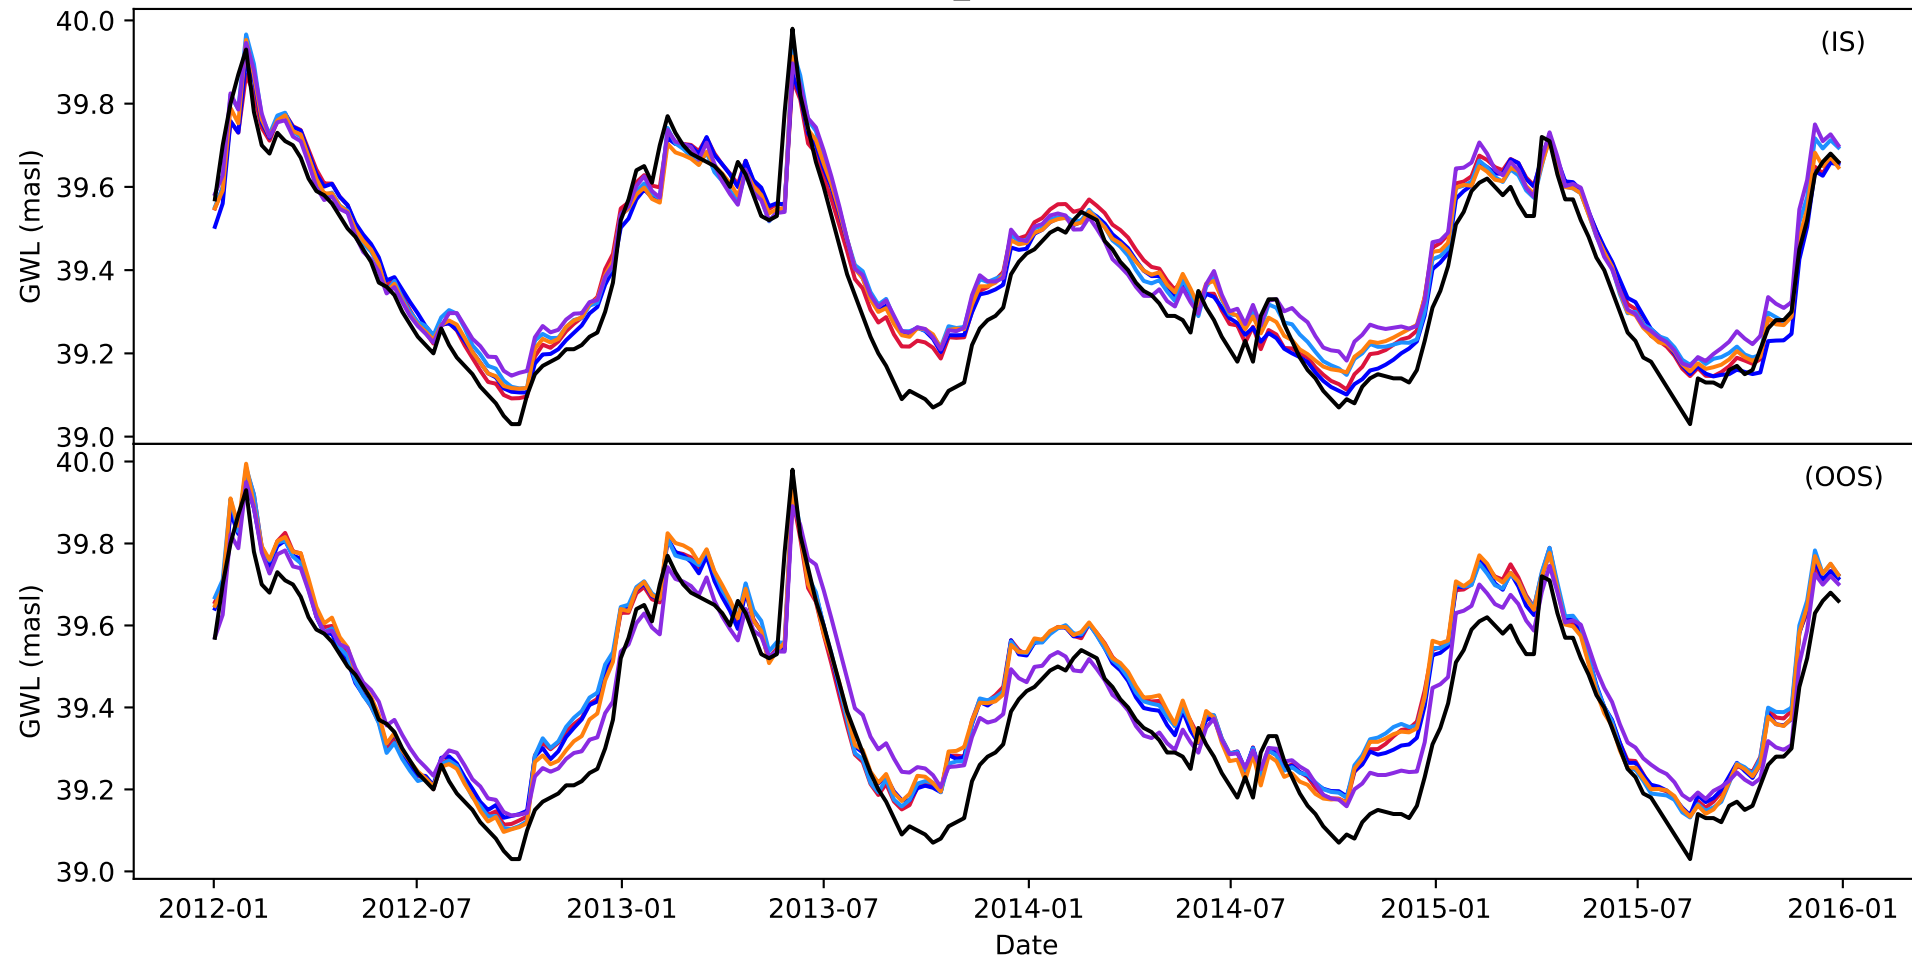

- obs
- ENVfeat (IS) NSE=0.932
- RNDfeat18 (IS) NSE=0.917
- TSfeat (IS) NSE=0.932
- RNDfeat9 (IS) NSE=0.917
- DYNOnly (IS) NSE=0.898

- obs
- ENVfeat (OOS) NSE=0.828
- RNDfeat18 (OOS) NSE=0.838
- TSfeat (OOS) NSE=0.859
- RNDfeat8 (OOS) NSE=0.838
- DYNOnly (OOS) NSE=0.913

# NI\_40501911

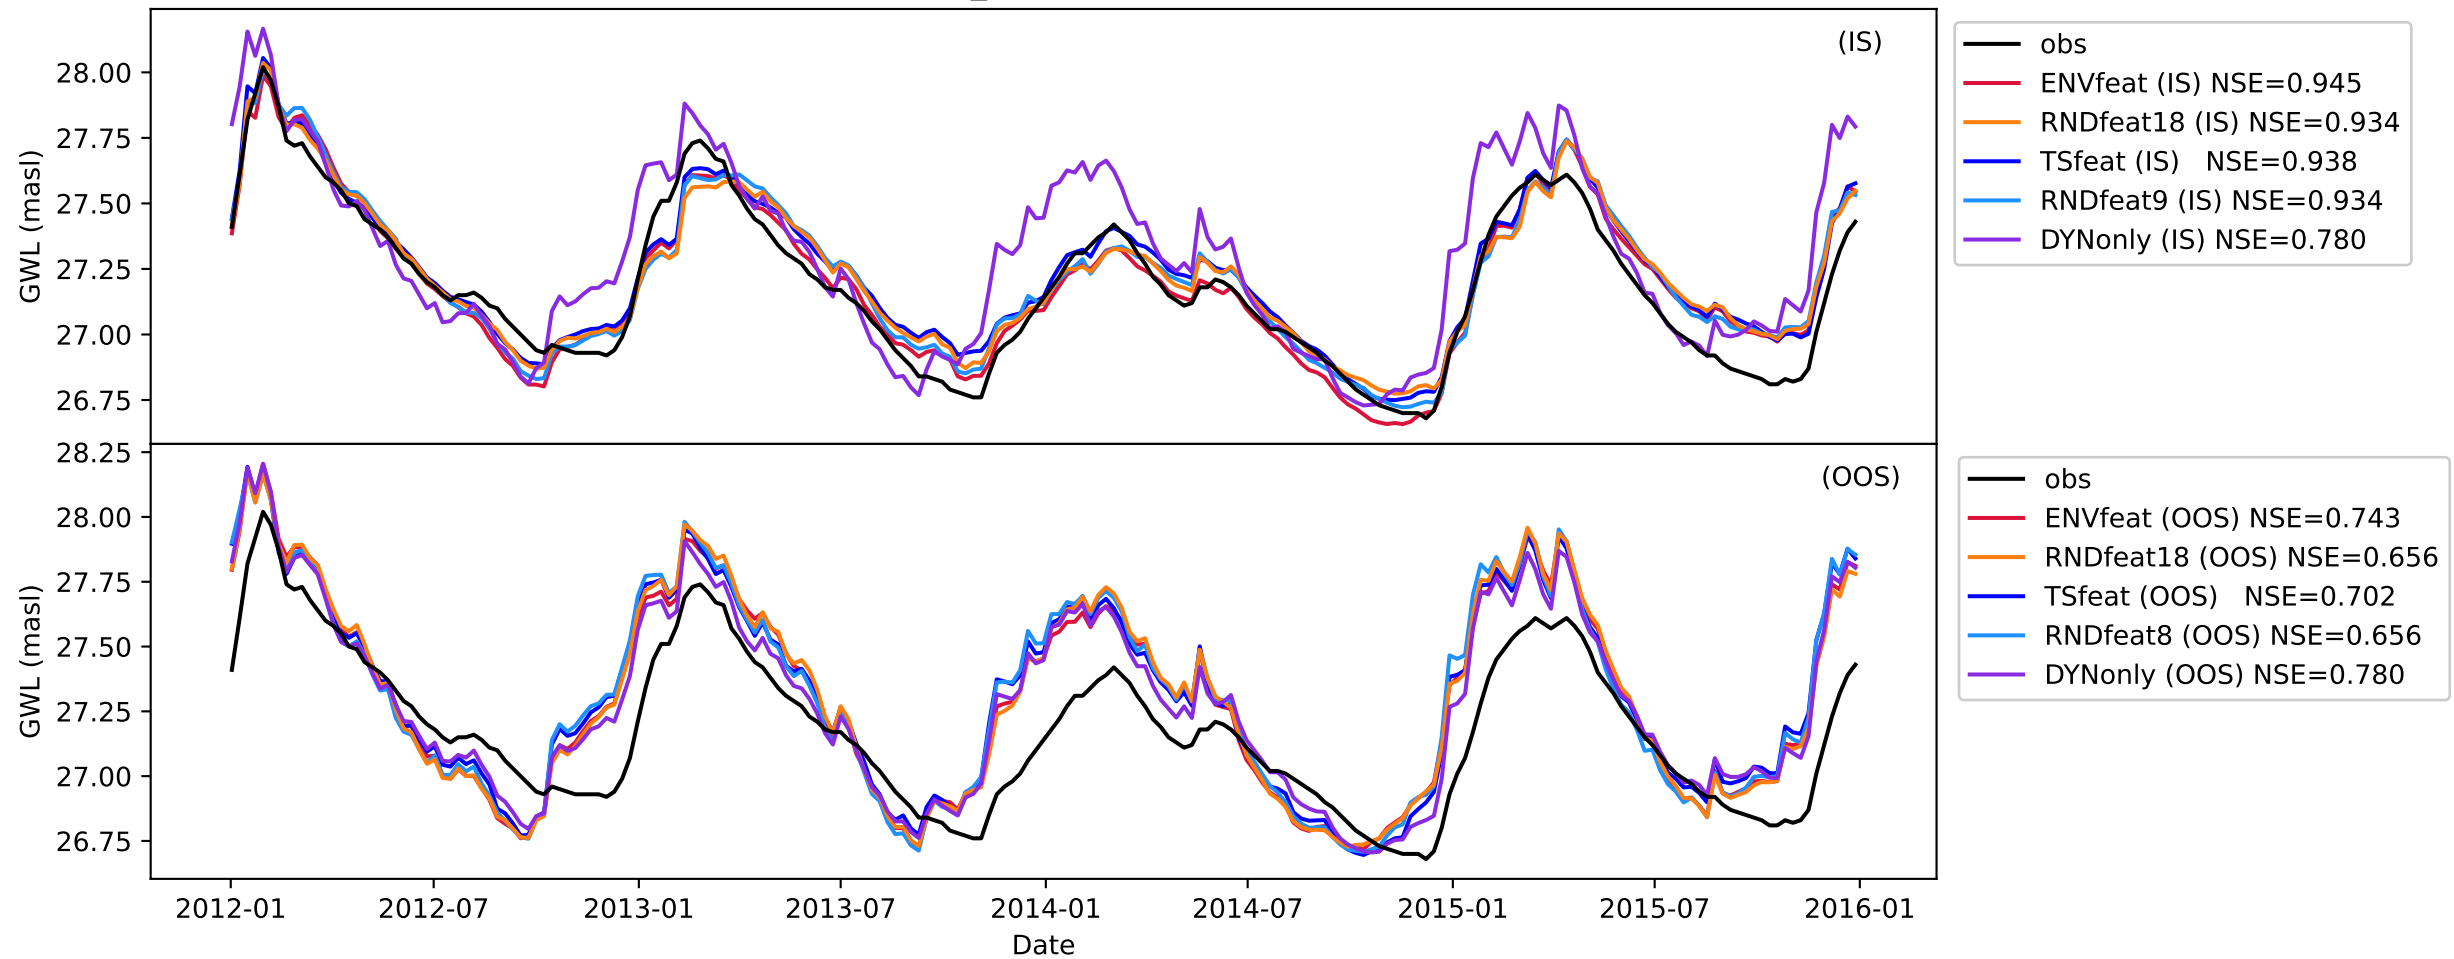

NI\_100000728

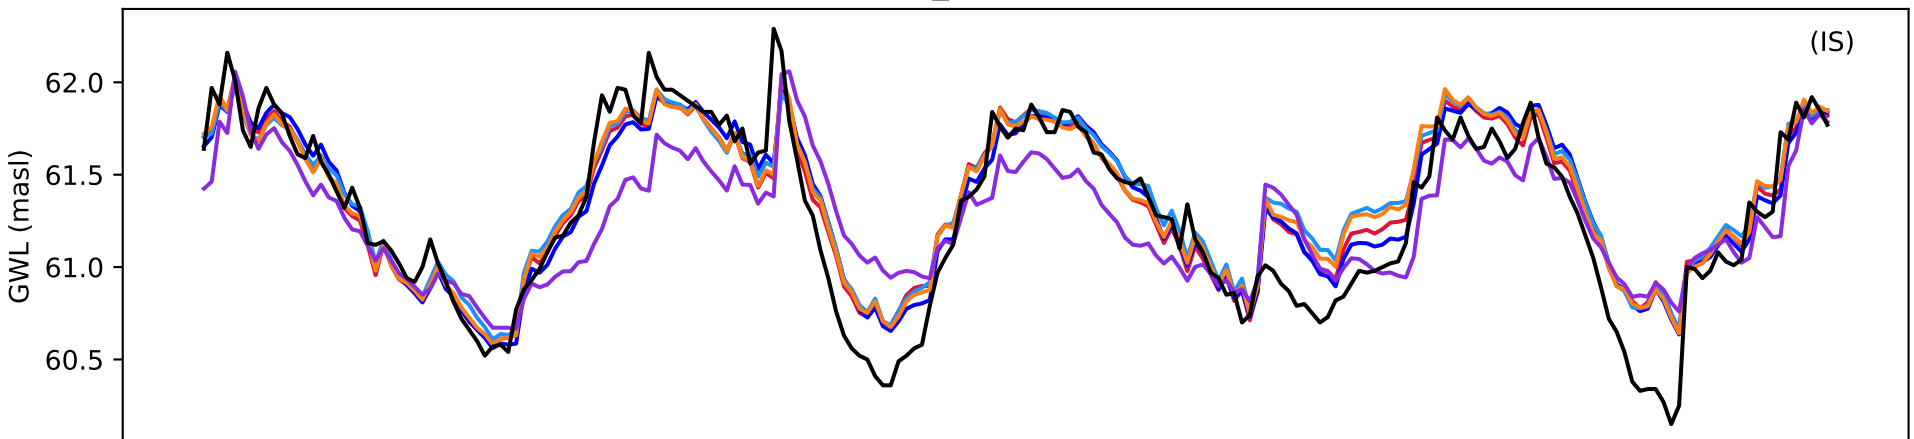

- obs
- ENVfeat (IS) NSE=0.843
- RNDfeat18 (IS) NSE=0.811
- TSfeat (IS) NSE=0.854
- RNDfeat9 (IS) NSE=0.811
- DYNOnly (IS) NSE=0.645

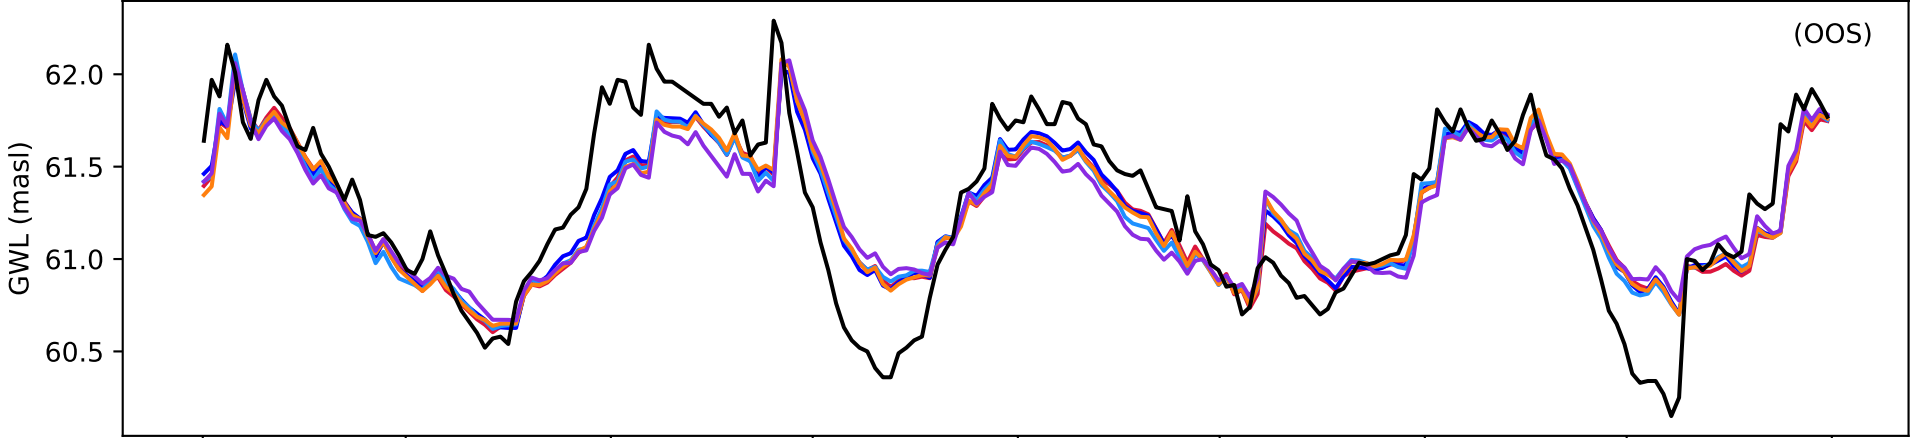

- obs
- ENVfeat (OOS) NSE=0.724
- RNDfeat18 (OOS) NSE=0.718
- TSfeat (OOS) NSE=0.763
- RNDfeat8 (OOS) NSE=0.718
- DYNOnly (OOS) NSE=0.655

2012-01      2012-07      2013-01      2013-07      2014-01      2014-07      2015-01      2015-07      2016-01

Date

GWL (masl)

GWL (masl)

NI\_100000842

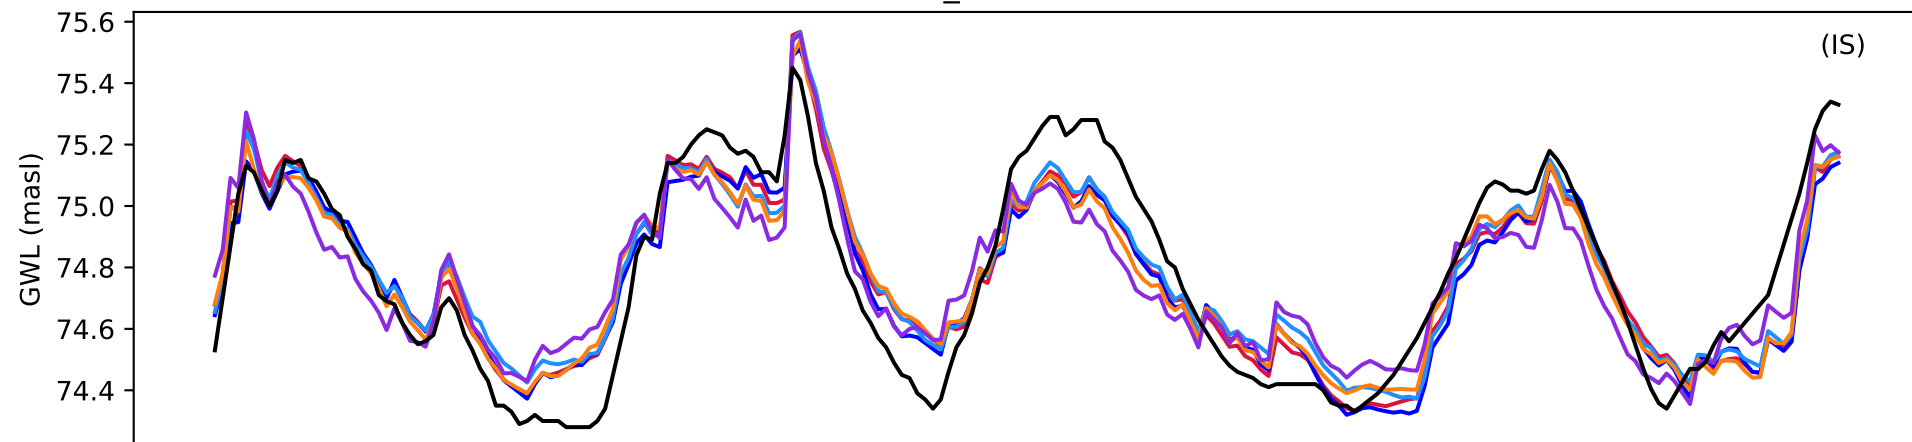

- obs
- ENVfeat (IS) NSE=0.854
- RNDfeat18 (IS) NSE=0.832
- TSfeat (IS) NSE=0.852
- RNDfeat9 (IS) NSE=0.832
- DYNOnly (IS) NSE=0.786

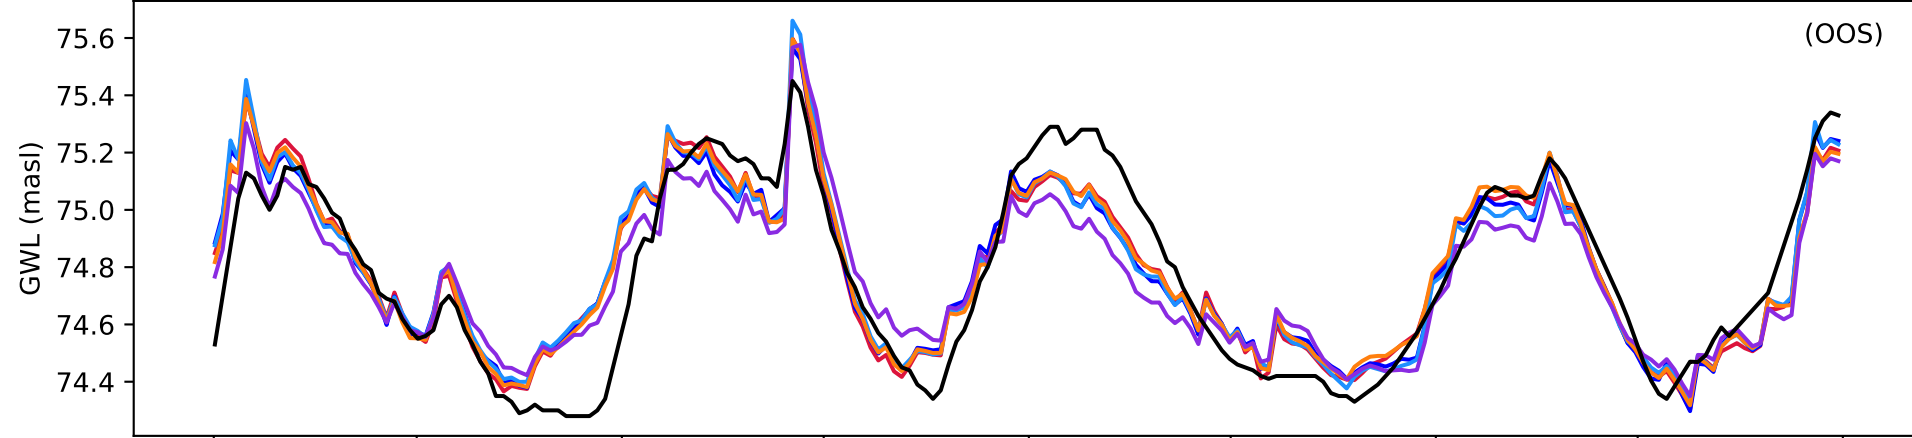

- obs
- ENVfeat (OOS) NSE=0.801
- RNDfeat18 (OOS) NSE=0.795
- TSfeat (OOS) NSE=0.774
- RNDfeat8 (OOS) NSE=0.795
- DYNOnly (OOS) NSE=0.798

2012-01      2012-07      2013-01      2013-07      2014-01      2014-07      2015-01      2015-07      2016-01

Date

# NI\_100000926

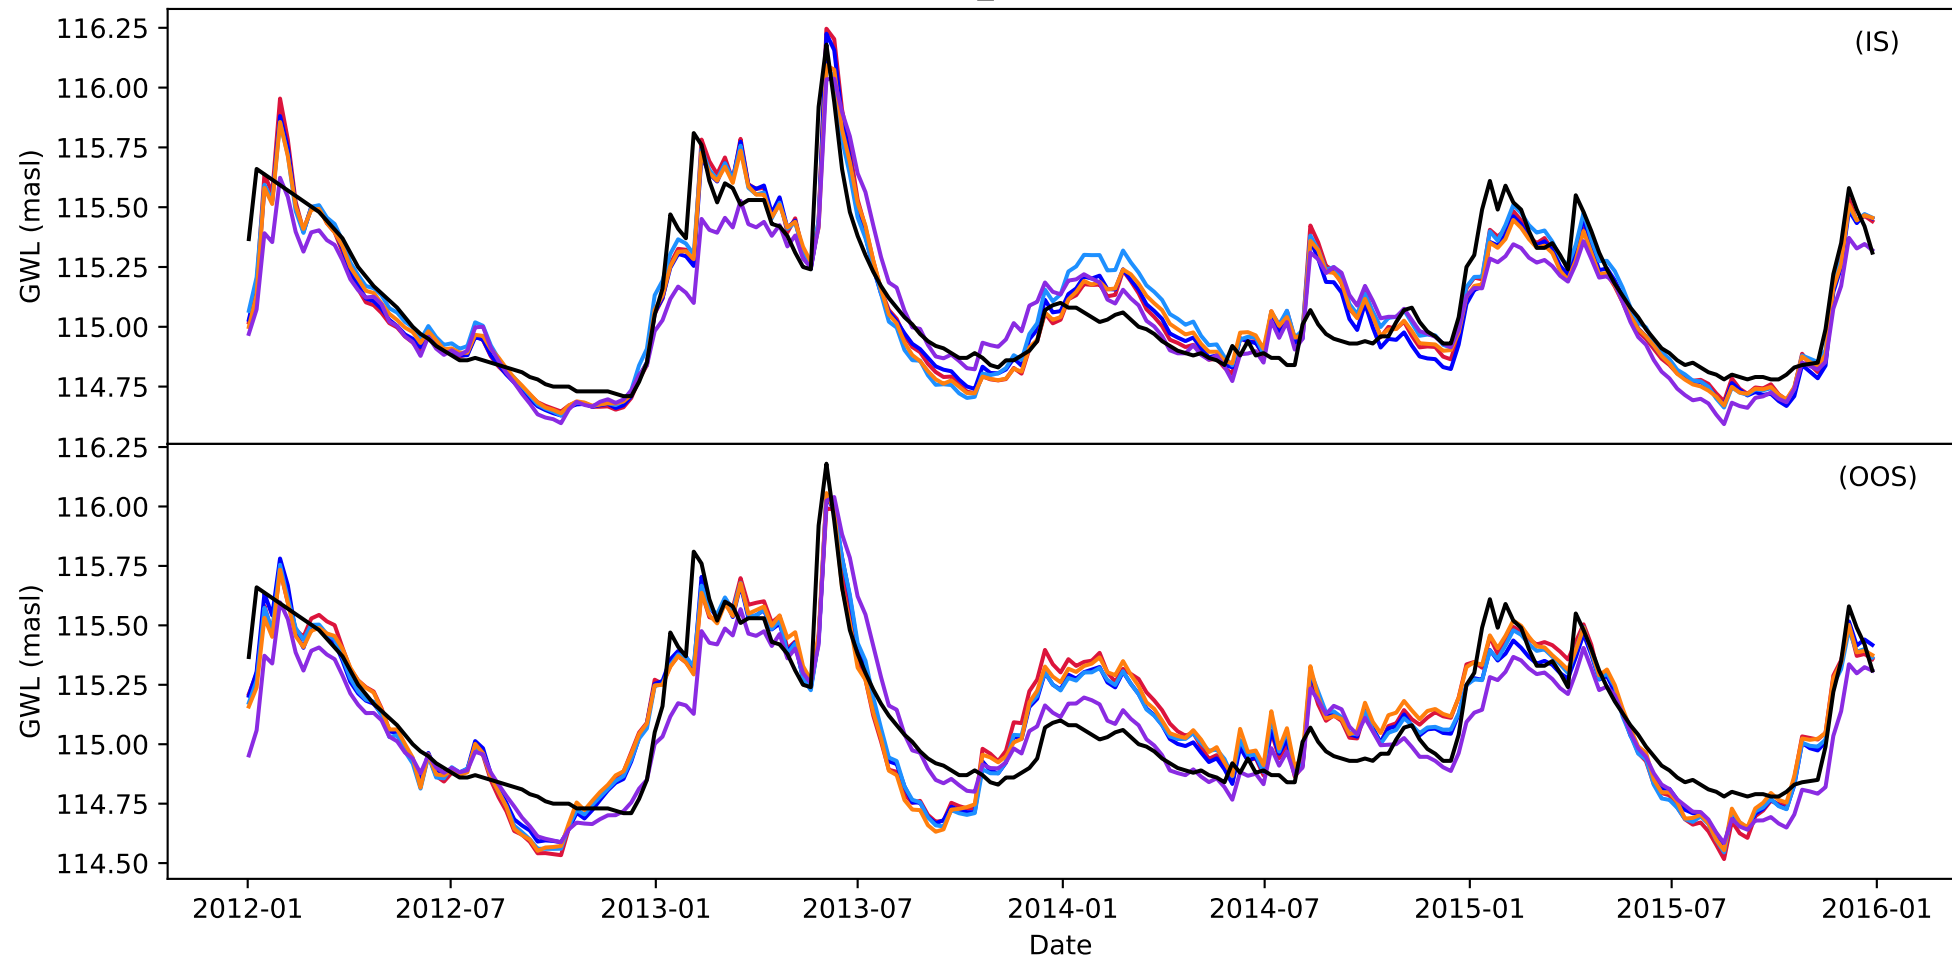

- obs
- ENVfeat (IS) NSE=0.833
- RNDfeat18 (IS) NSE=0.818
- TSfeat (IS) NSE=0.841
- RNDfeat9 (IS) NSE=0.818
- DYNOnly (IS) NSE=0.760

- obs
- ENVfeat (OOS) NSE=0.715
- RNDfeat18 (OOS) NSE=0.740
- TSfeat (OOS) NSE=0.770
- RNDfeat8 (OOS) NSE=0.740
- DYNOnly (OOS) NSE=0.782

NI\_129300060

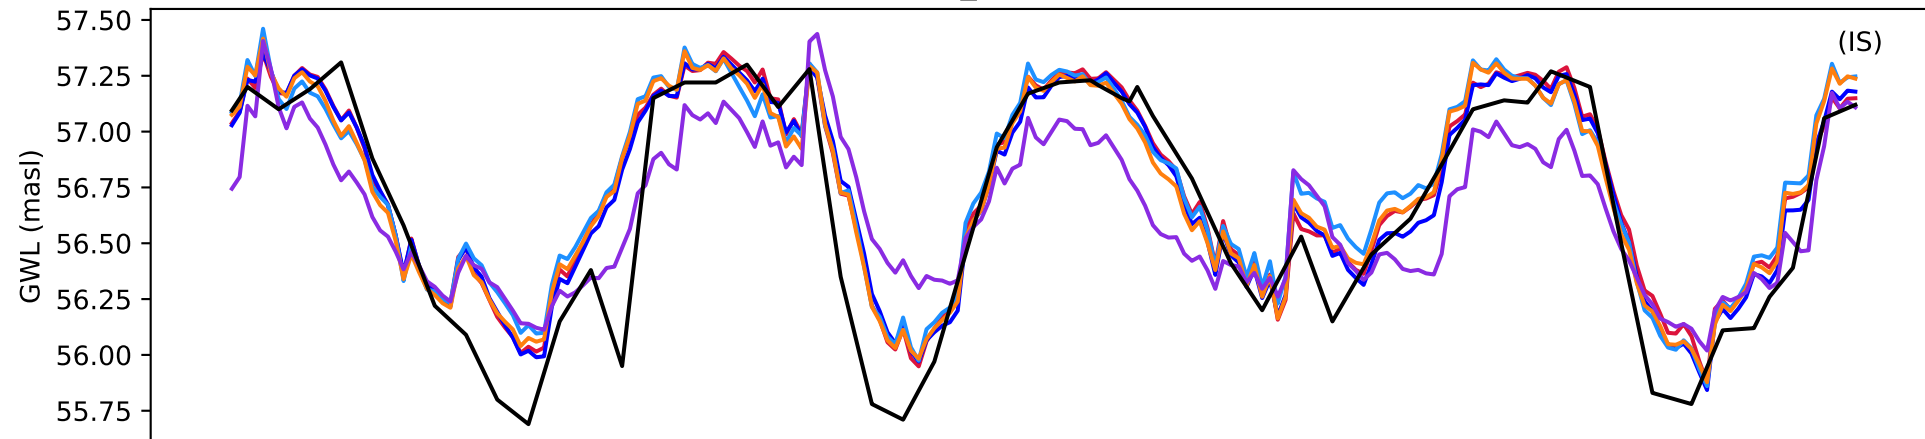

- obs
- ENVfeat (IS) NSE=0.839
- RNDfeat18 (IS) NSE=0.790
- TSfeat (IS) NSE=0.847
- RNDfeat9 (IS) NSE=0.790
- DYNonly (IS) NSE=0.670

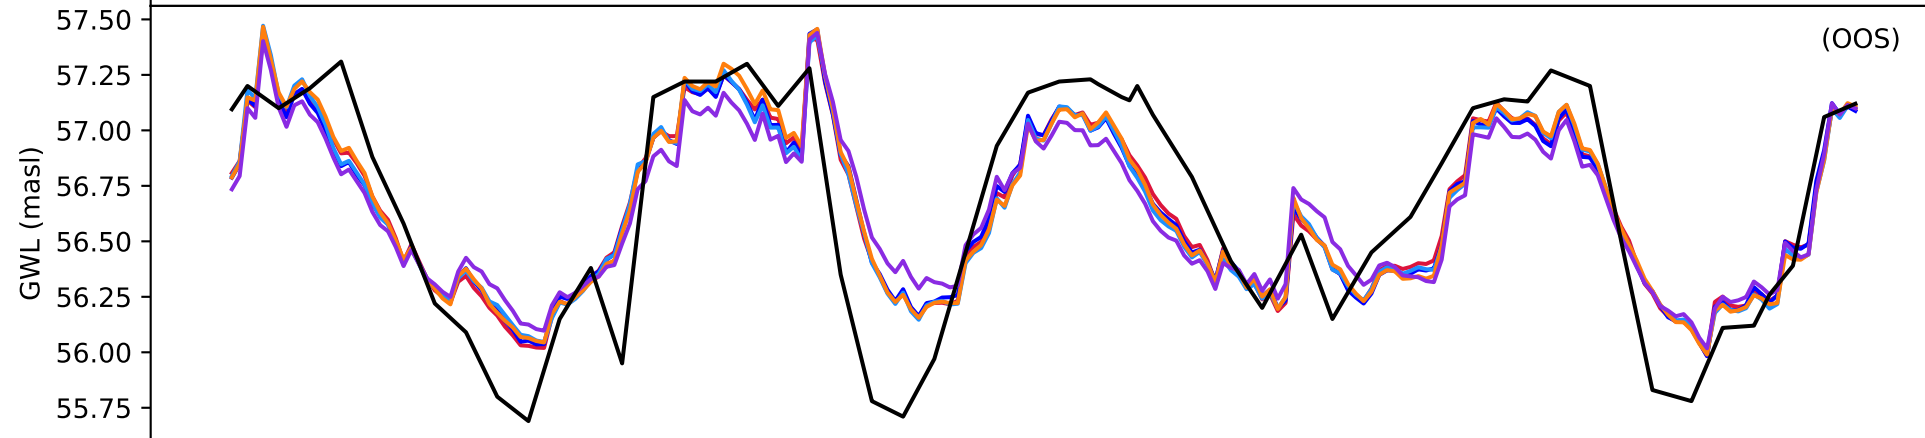

- obs
- ENVfeat (OOS) NSE=0.781
- RNDfeat18 (OOS) NSE=0.740
- TSfeat (OOS) NSE=0.756
- RNDfeat8 (OOS) NSE=0.740
- DYNonly (OOS) NSE=0.675

2012-01      2012-07      2013-01      2013-07      2014-01      2014-07      2015-01      2015-07      2016-01

Date

NI\_200000620

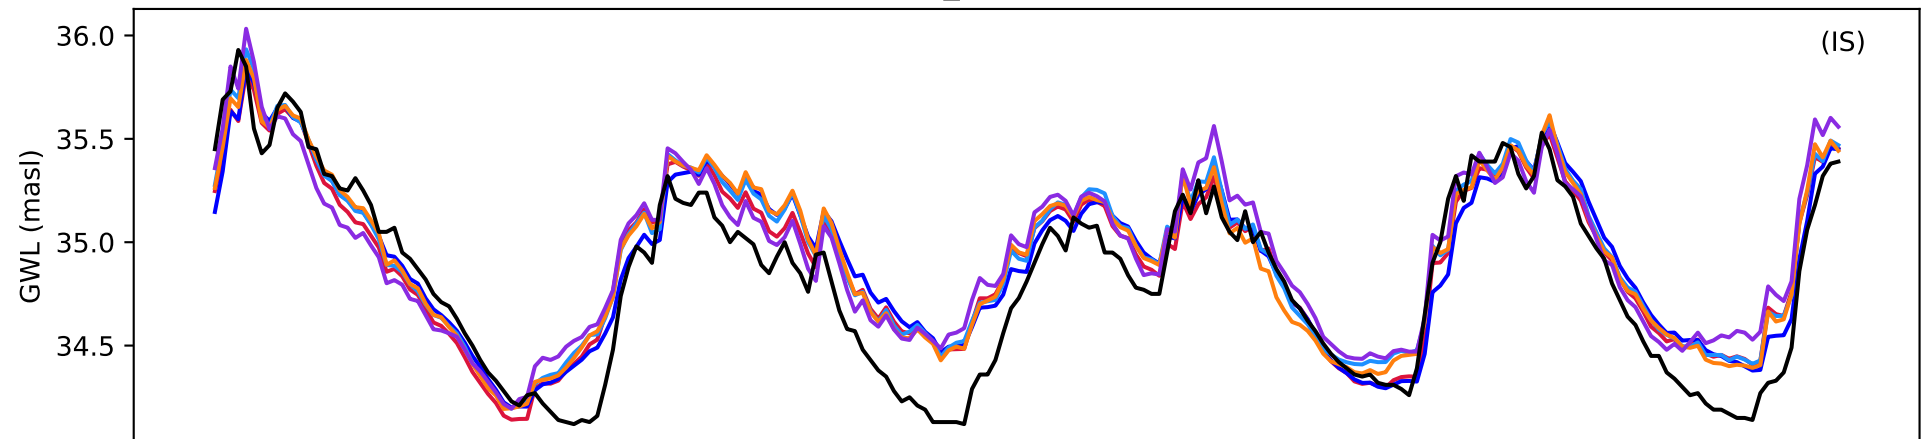

- obs
- ENVfeat (IS) NSE=0.870
- RNDfeat18 (IS) NSE=0.861
- TSfeat (IS) NSE=0.865
- RNDfeat9 (IS) NSE=0.861
- DYNOnly (IS) NSE=0.823

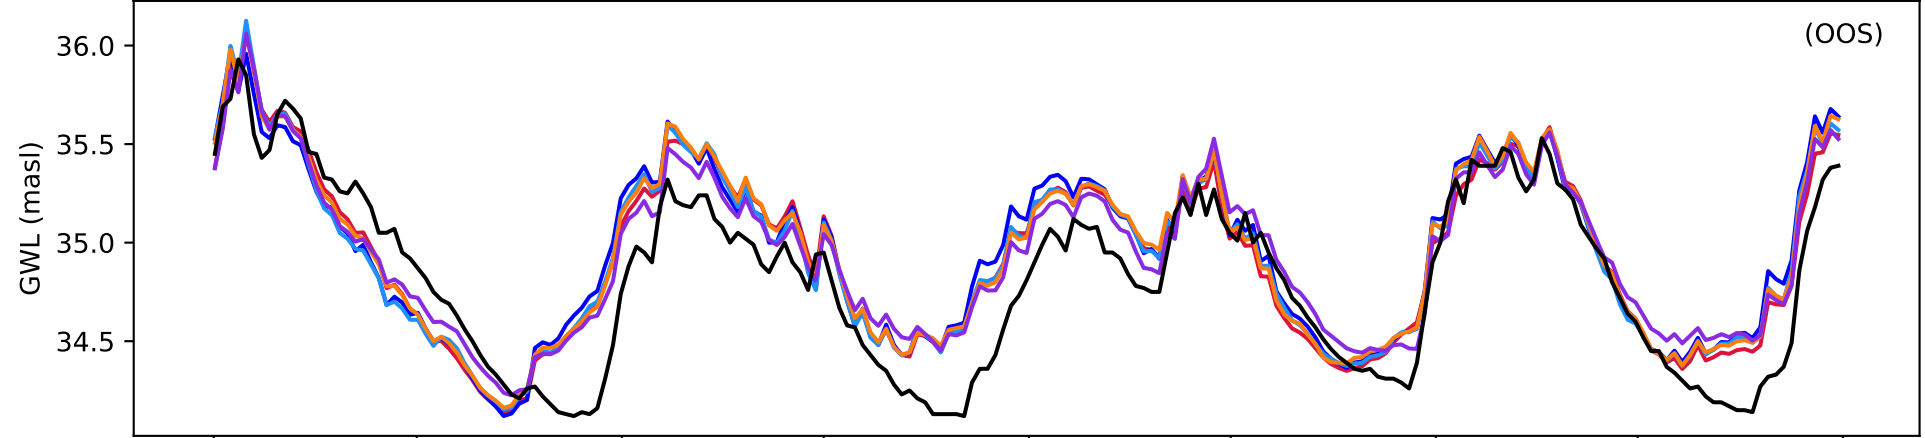

- obs
- ENVfeat (OOS) NSE=0.819
- RNDfeat18 (OOS) NSE=0.794
- TSfeat (OOS) NSE=0.745
- RNDfeat8 (OOS) NSE=0.794
- DYNOnly (OOS) NSE=0.839

2012-01      2012-07      2013-01      2013-07      2014-01      2014-07      2015-01      2015-07      2016-01

Date



NI\_200000788

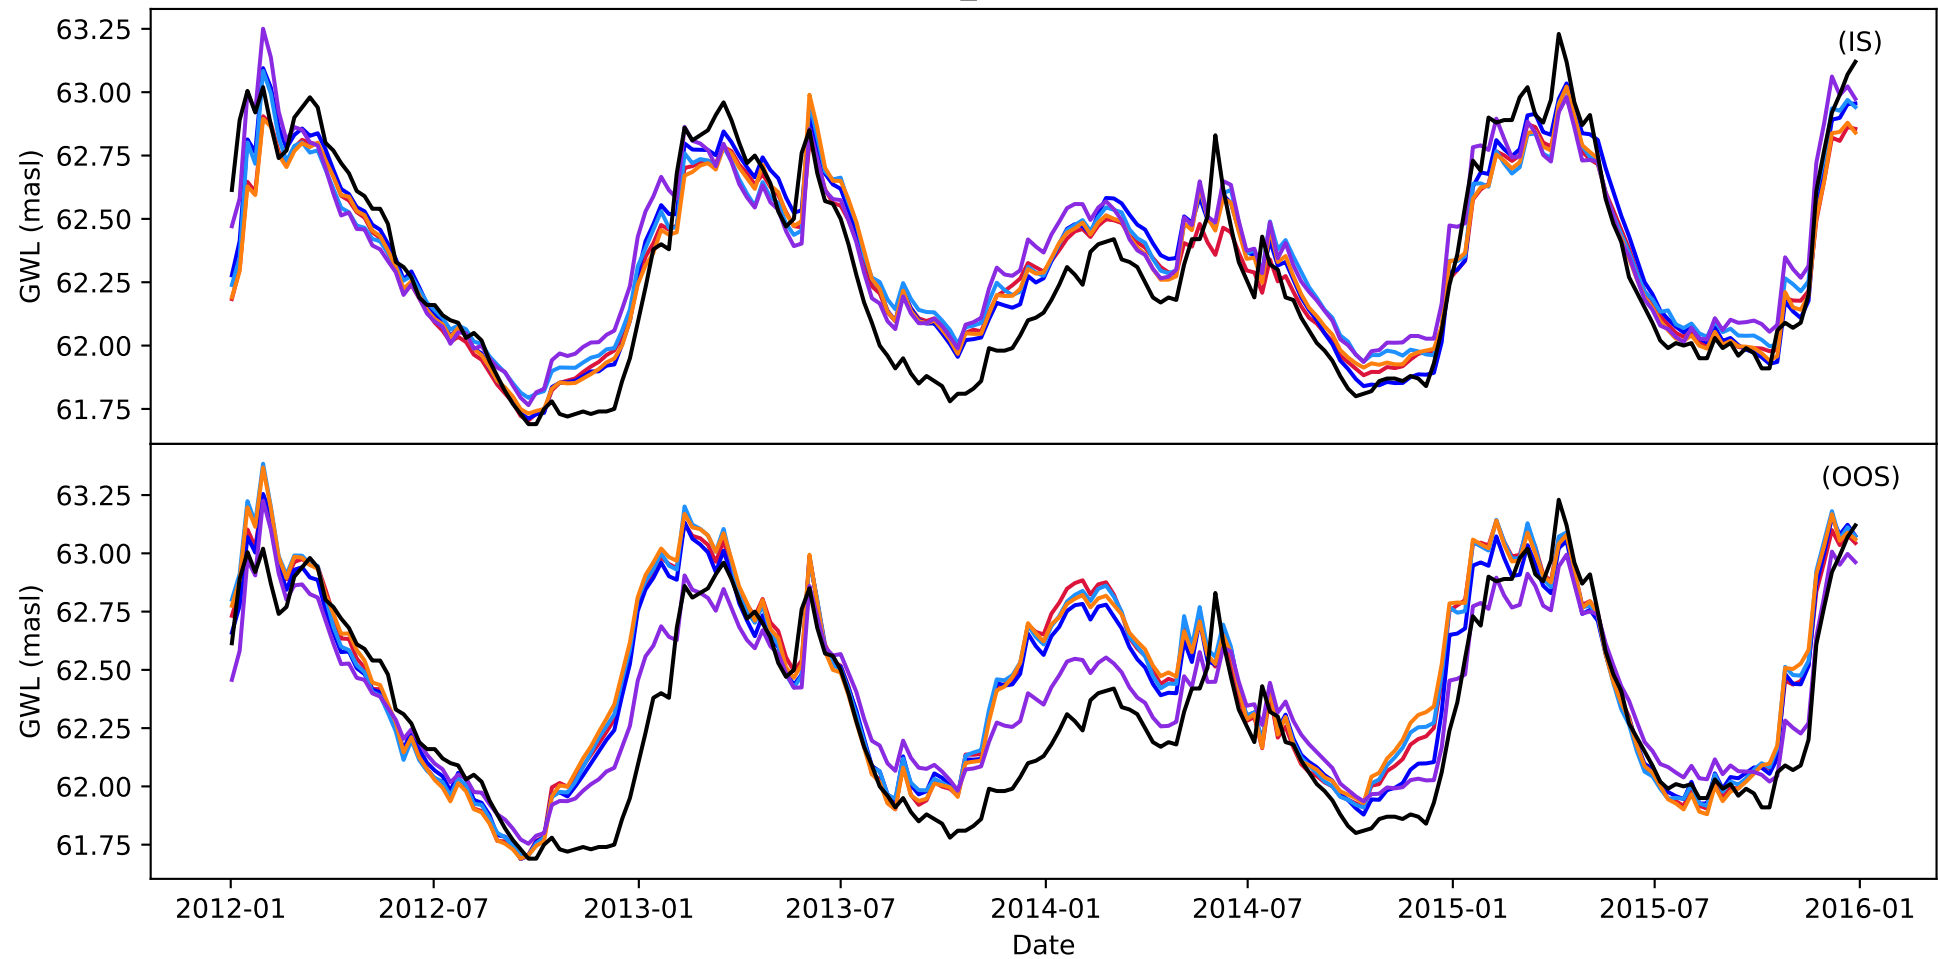

- obs
- ENVfeat (IS) NSE=0.911
- RNDfeat18 (IS) NSE=0.895
- TSfeat (IS) NSE=0.929
- RNDfeat9 (IS) NSE=0.895
- DYNonly (IS) NSE=0.885

- obs
- ENVfeat (OOS) NSE=0.720
- RNDfeat18 (OOS) NSE=0.681
- TSfeat (OOS) NSE=0.756
- RNDfeat8 (OOS) NSE=0.681
- DYNonly (OOS) NSE=0.901

NI\_200001068

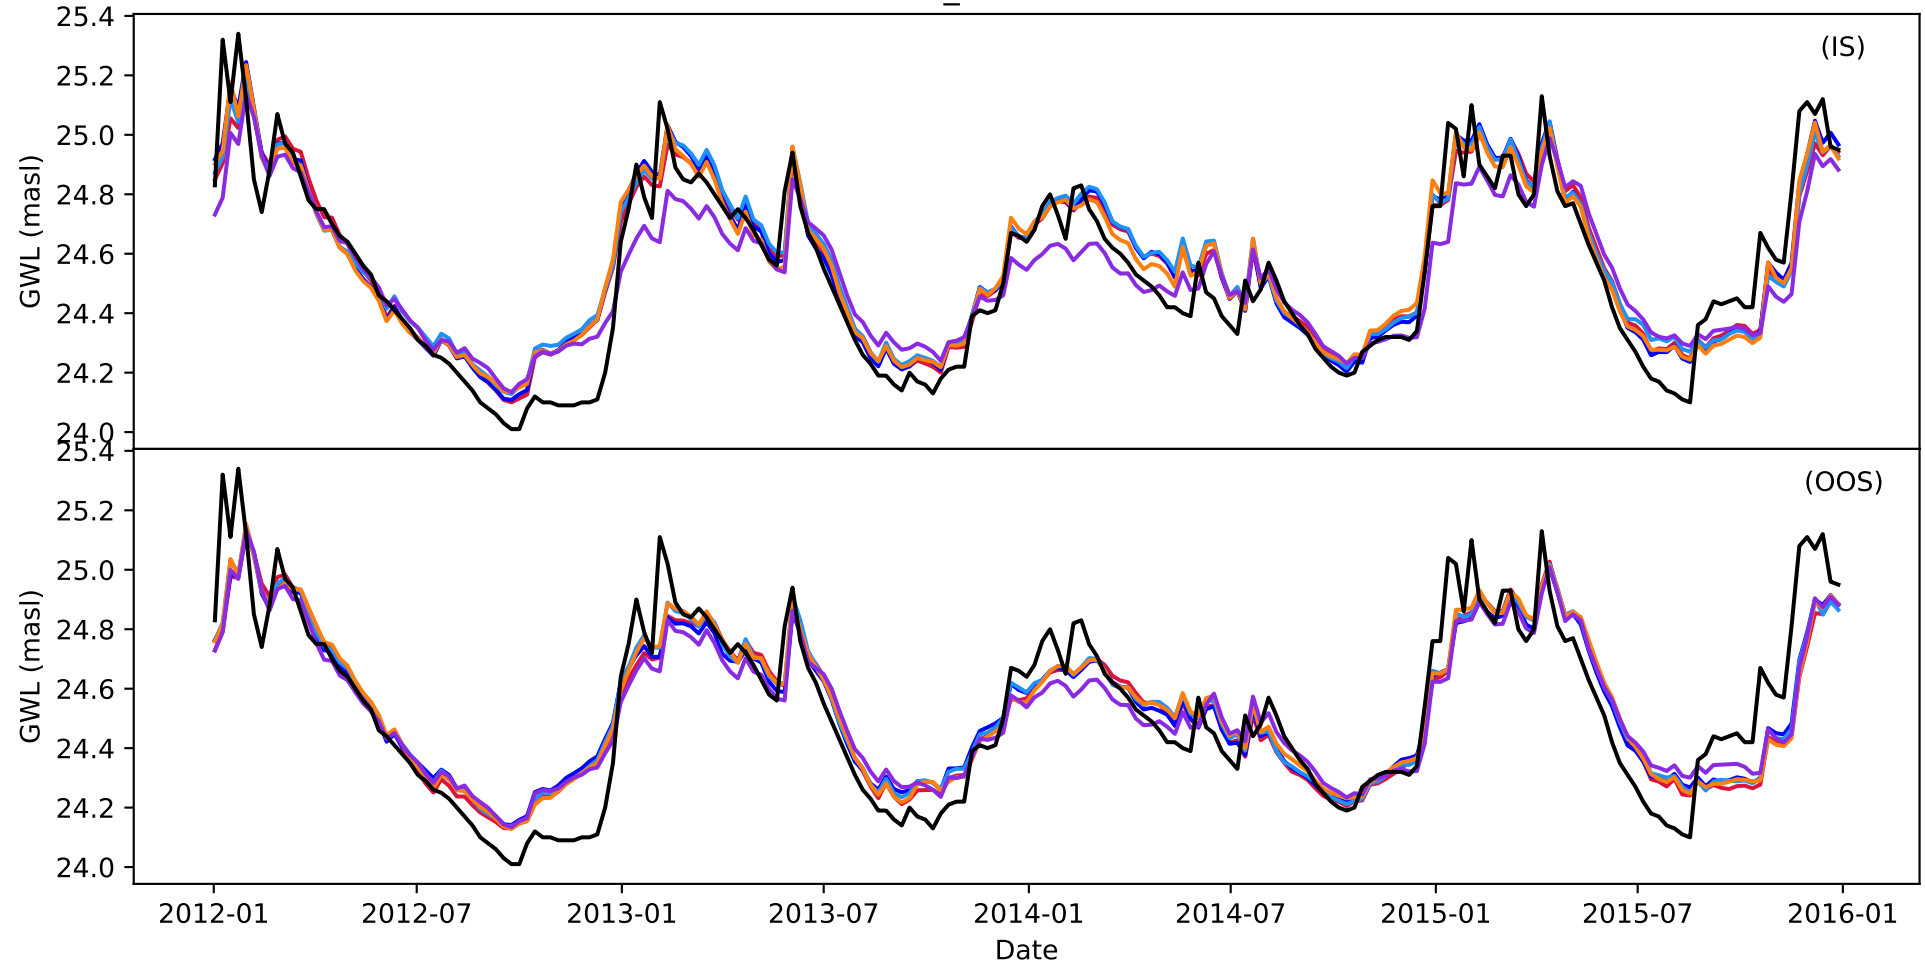

- obs
- ENVfeat (IS) NSE=0.881
- RNDfeat18 (IS) NSE=0.866
- TSfeat (IS) NSE=0.883
- RNDfeat9 (IS) NSE=0.866
- DYNonly (IS) NSE=0.827

- obs
- ENVfeat (OOS) NSE=0.839
- RNDfeat18 (OOS) NSE=0.843
- TSfeat (OOS) NSE=0.843
- RNDfeat8 (OOS) NSE=0.843
- DYNonly (OOS) NSE=0.825

NI\_200001722

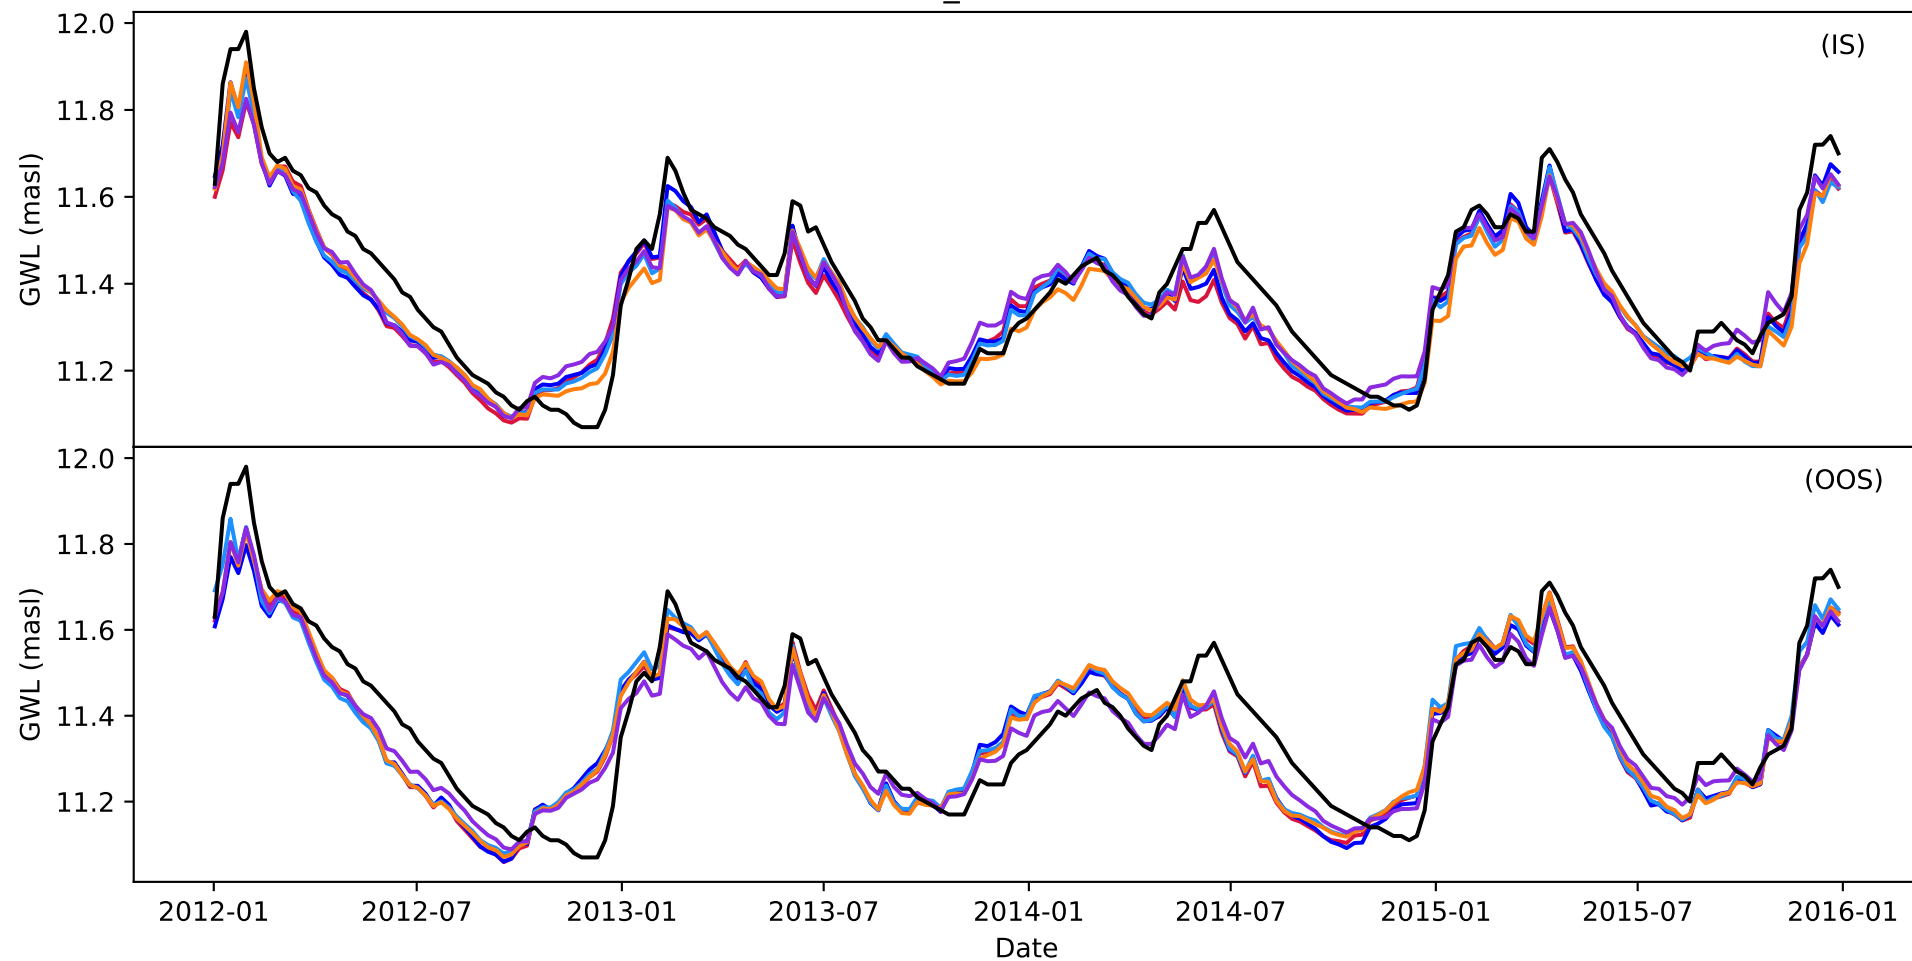

- obs
- ENVfeat (IS) NSE=0.838
- RNDfeat18 (IS) NSE=0.884
- TSfeat (IS) NSE=0.876
- RNDfeat9 (IS) NSE=0.884
- DYNSonly (IS) NSE=0.875

- obs
- ENVfeat (OOS) NSE=0.814
- RNDfeat18 (OOS) NSE=0.823
- TSfeat (OOS) NSE=0.798
- RNDfeat8 (OOS) NSE=0.823
- DYNSonly (OOS) NSE=0.877

NI\_200002153

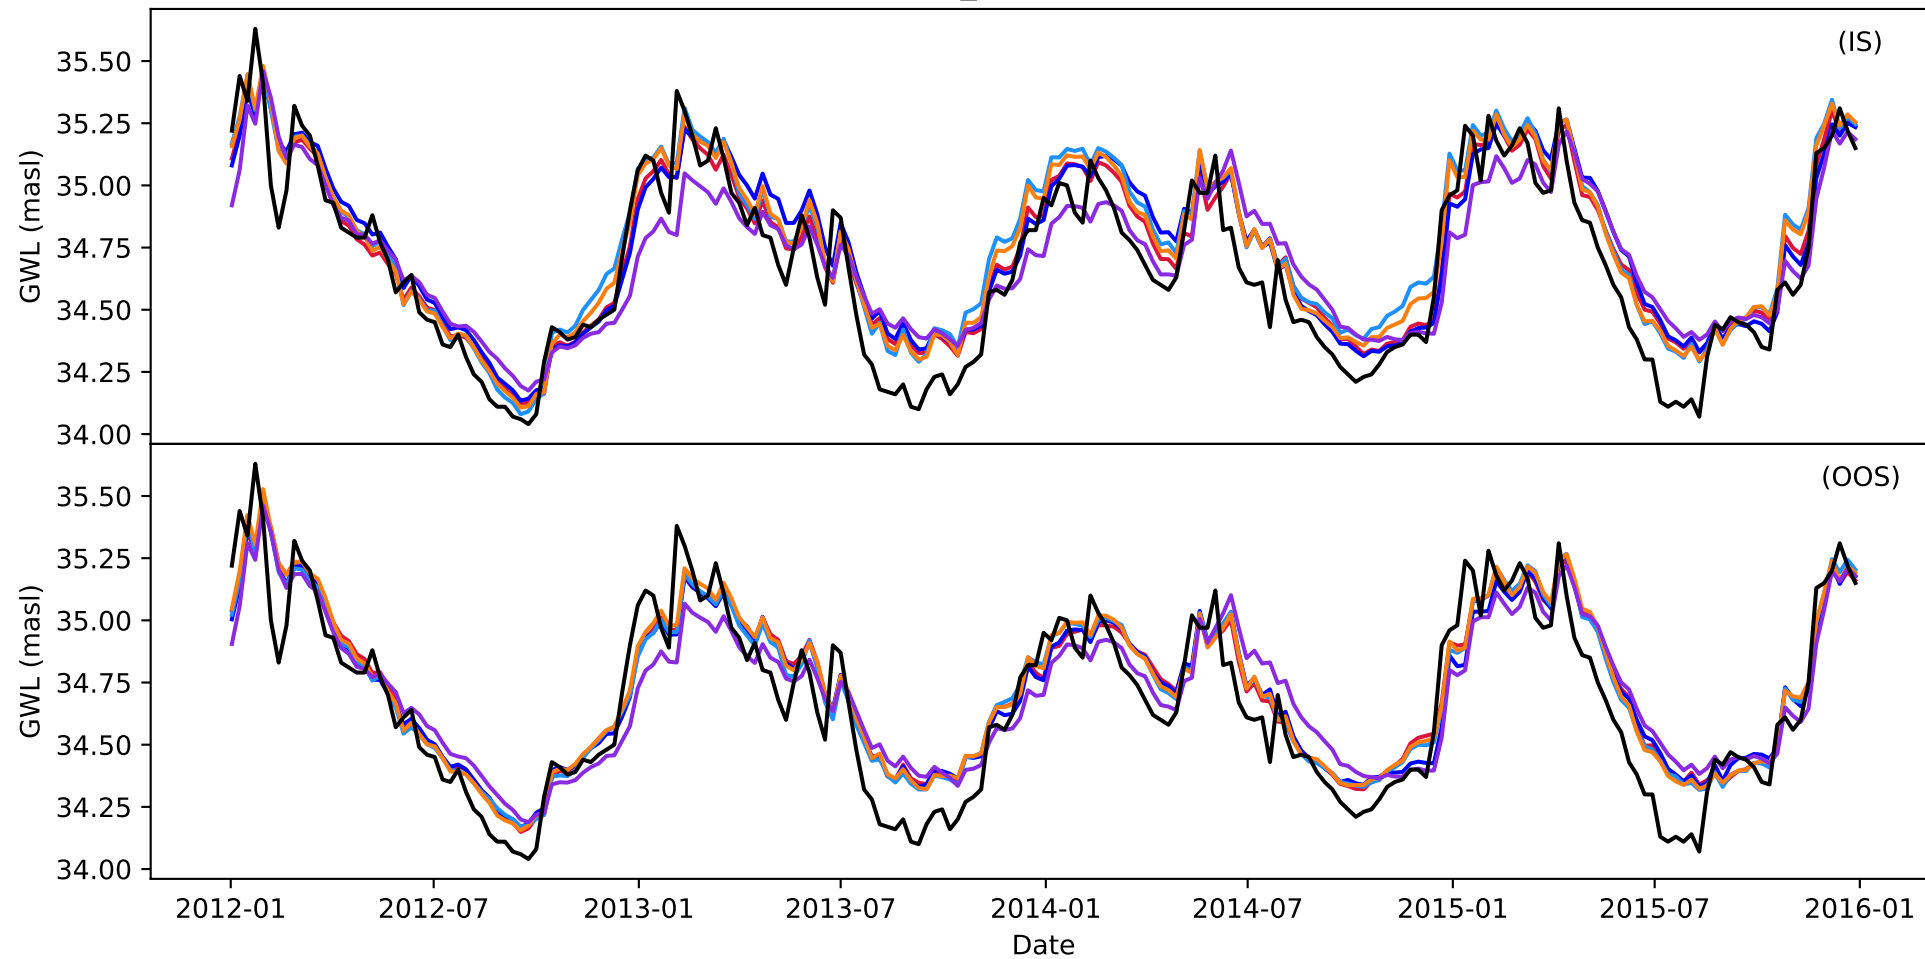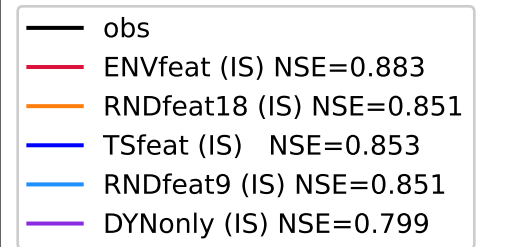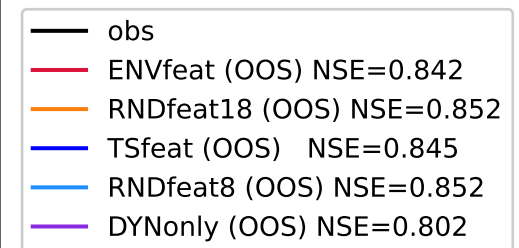

NI\_400080190

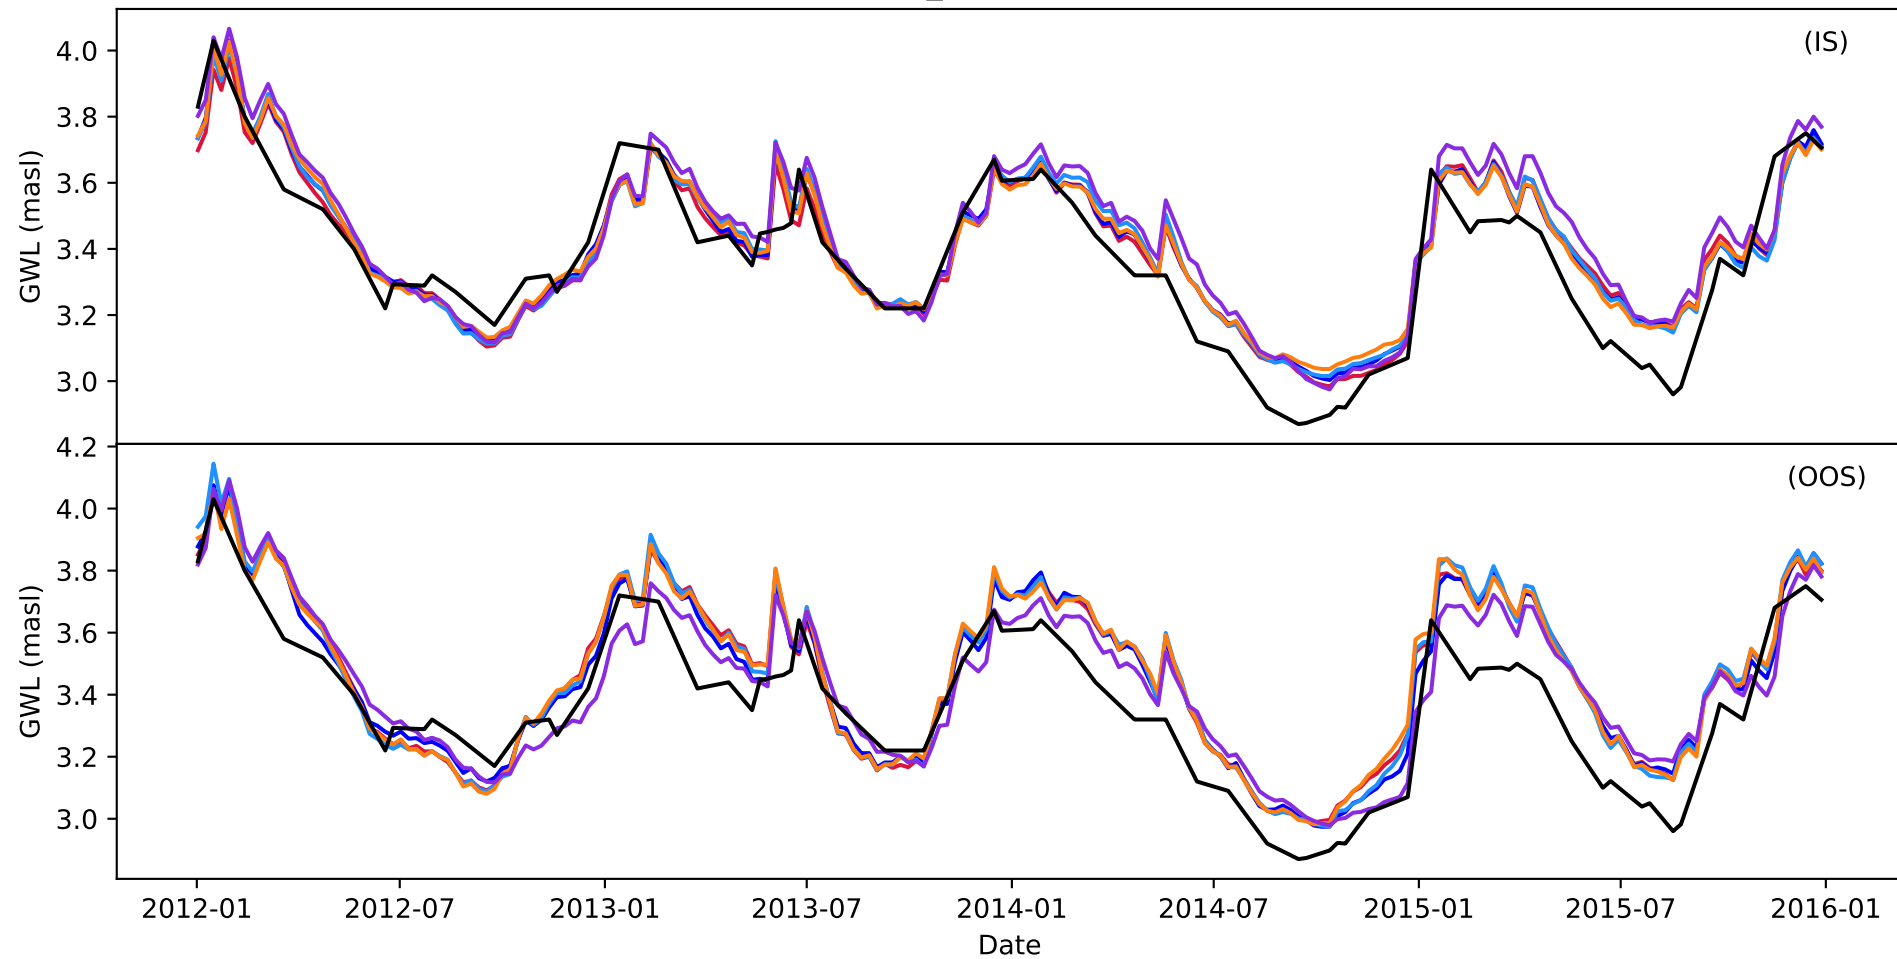

- obs
- ENVfeat (IS) NSE=0.874
- RNDfeat18 (IS) NSE=0.862
- TSfeat (IS) NSE=0.880
- RNDfeat9 (IS) NSE=0.862
- DYNonly (IS) NSE=0.814

- obs
- ENVfeat (OOS) NSE=0.696
- RNDfeat18 (OOS) NSE=0.700
- TSfeat (OOS) NSE=0.767
- RNDfeat8 (OOS) NSE=0.700
- DYNonly (OOS) NSE=0.806

# NI\_400081660

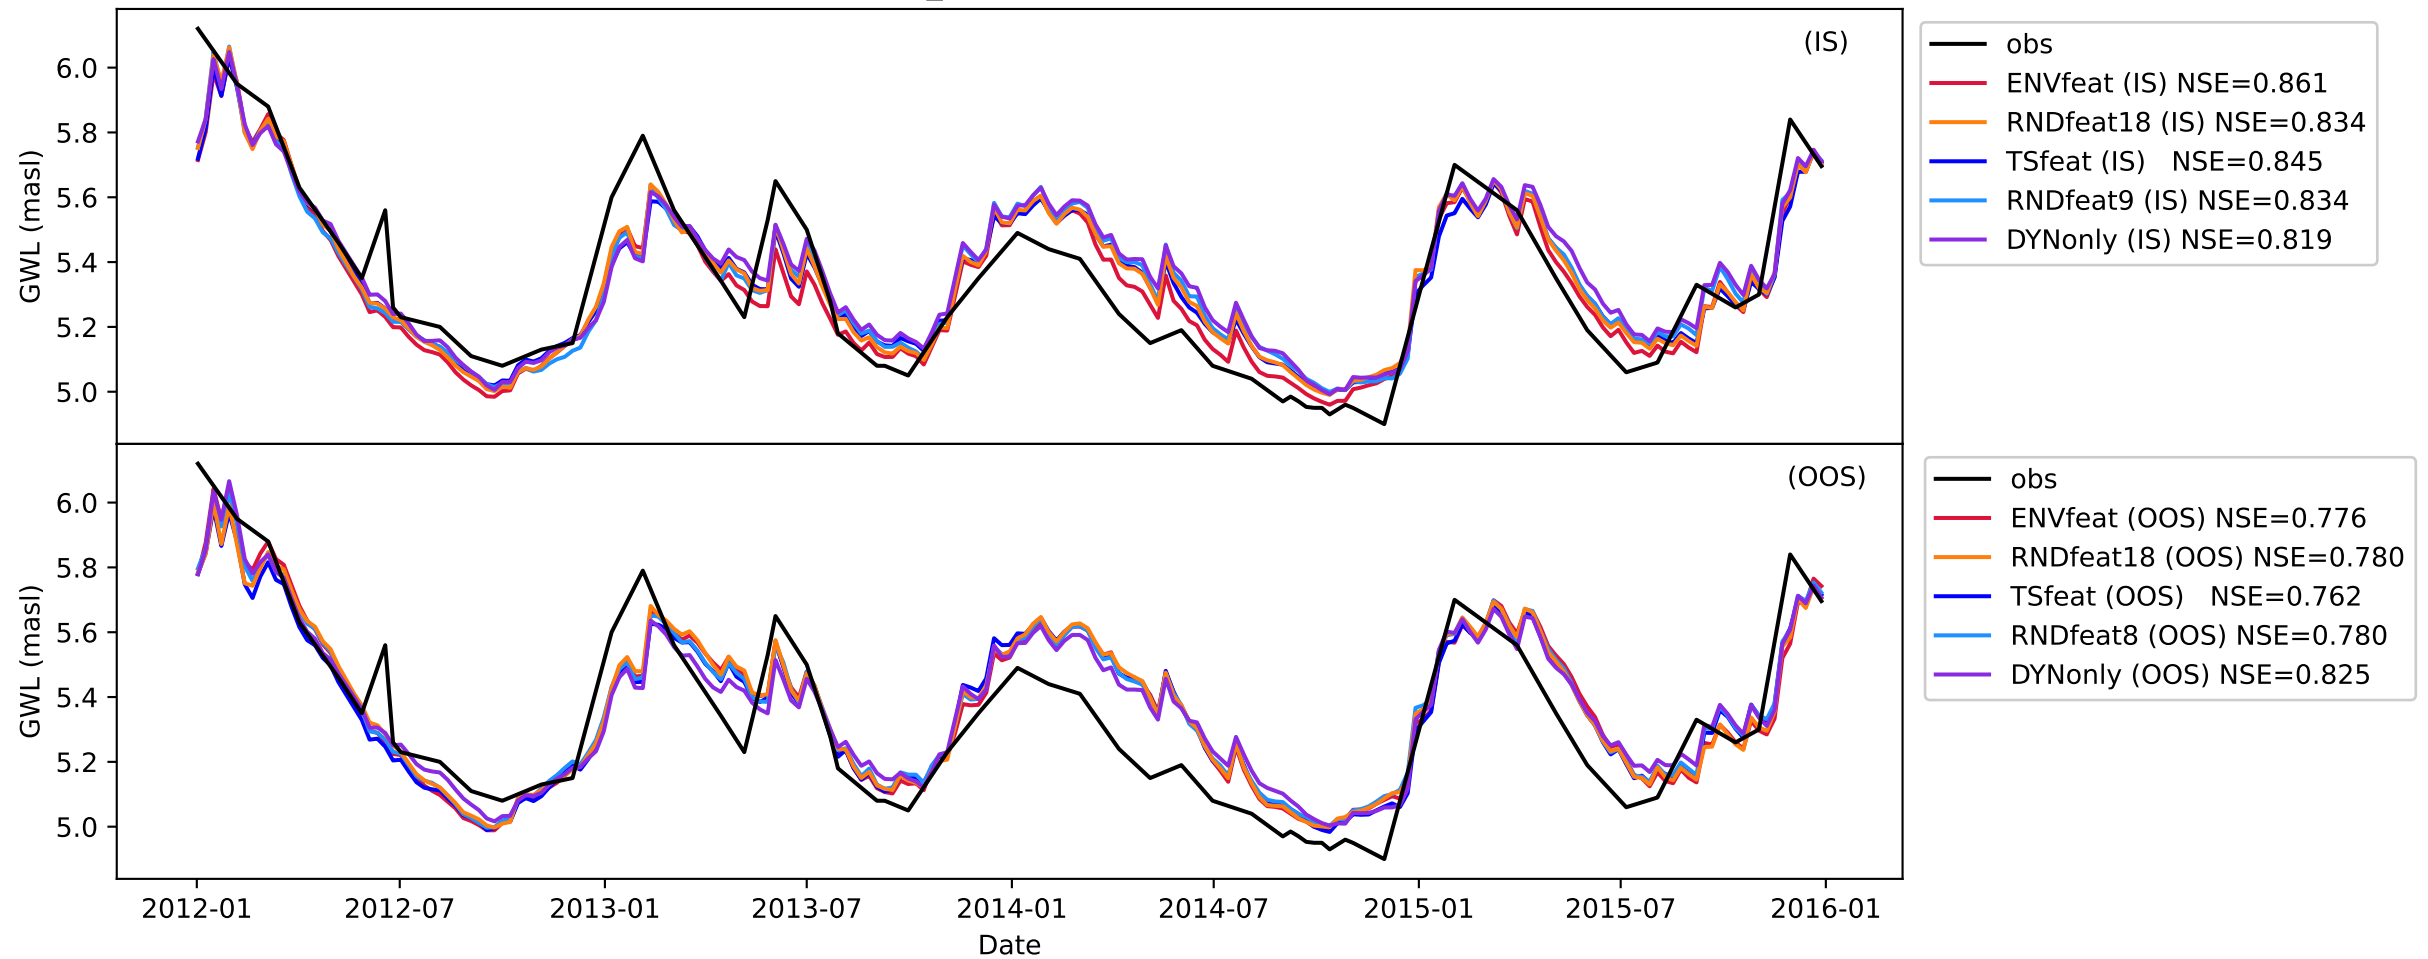

# NI\_405160331

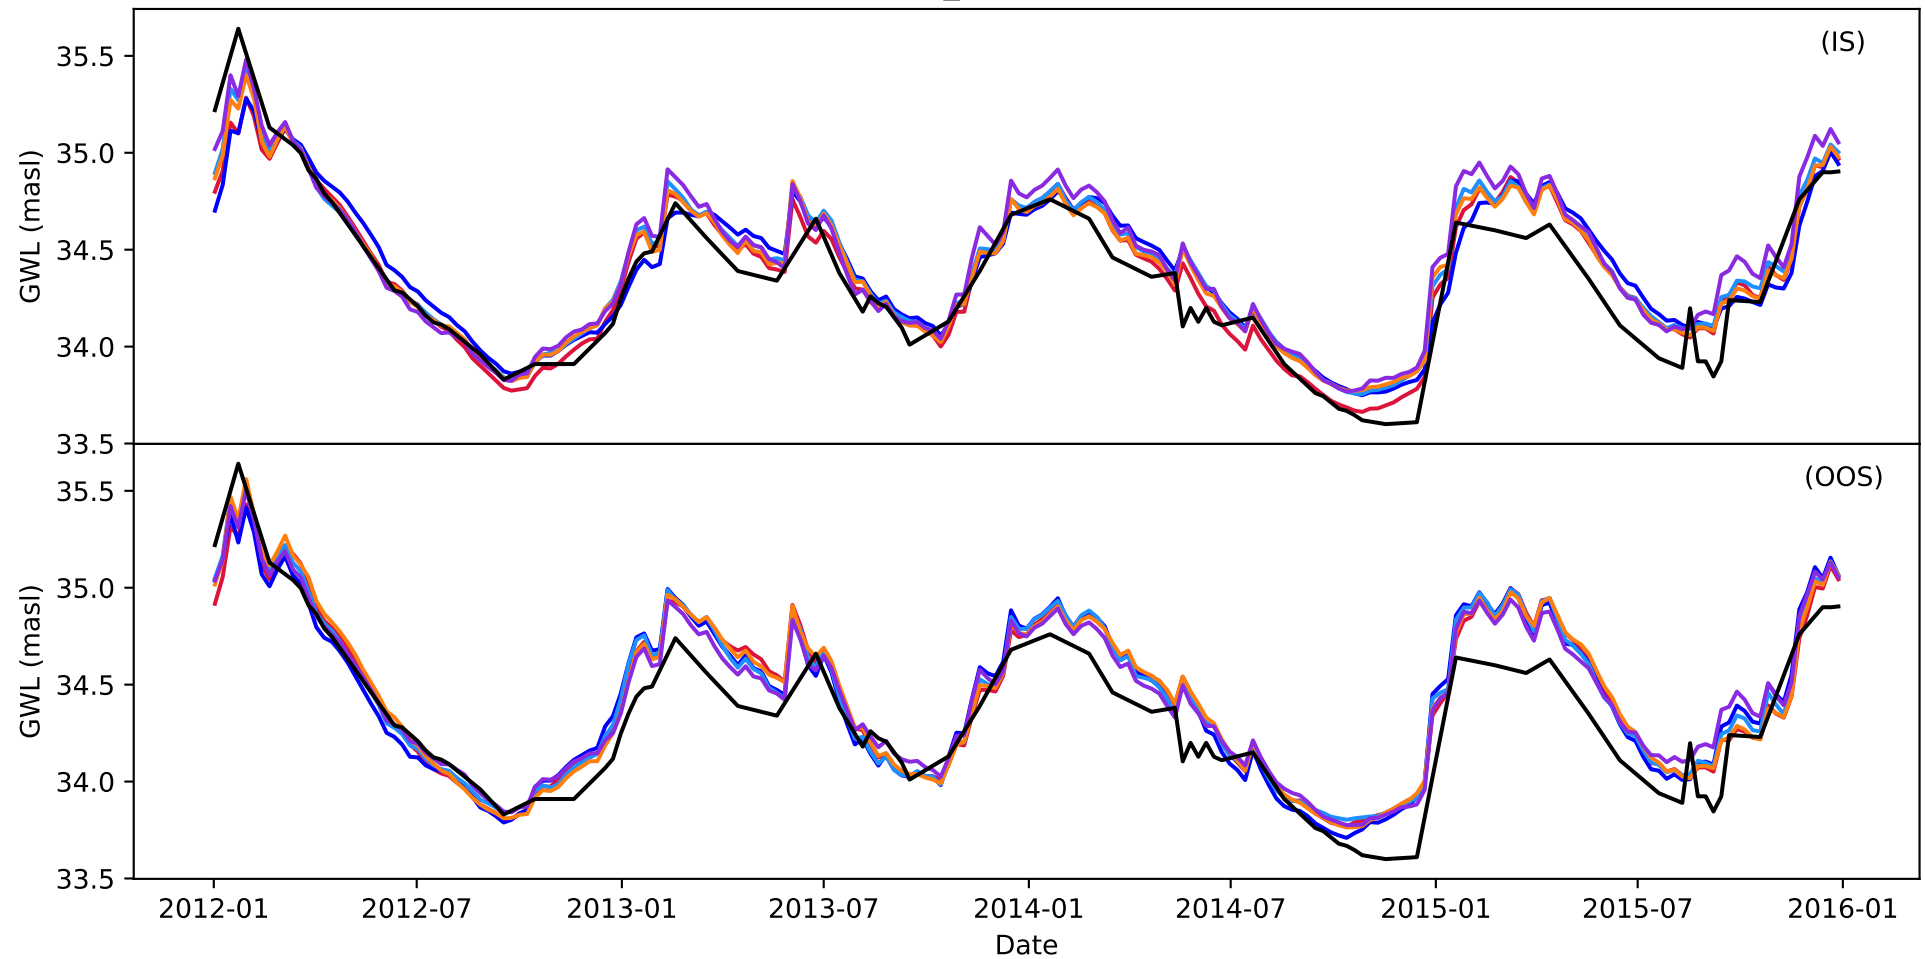

- obs
- ENVfeat (IS) NSE=0.919
- RNDfeat18 (IS) NSE=0.896
- TSfeat (IS) NSE=0.885
- RNDfeat9 (IS) NSE=0.896
- DYNOnly (IS) NSE=0.878

- obs
- ENVfeat (OOS) NSE=0.823
- RNDfeat18 (OOS) NSE=0.821
- TSfeat (OOS) NSE=0.832
- RNDfeat8 (OOS) NSE=0.821
- DYNOnly (OOS) NSE=0.883

NI\_500000592

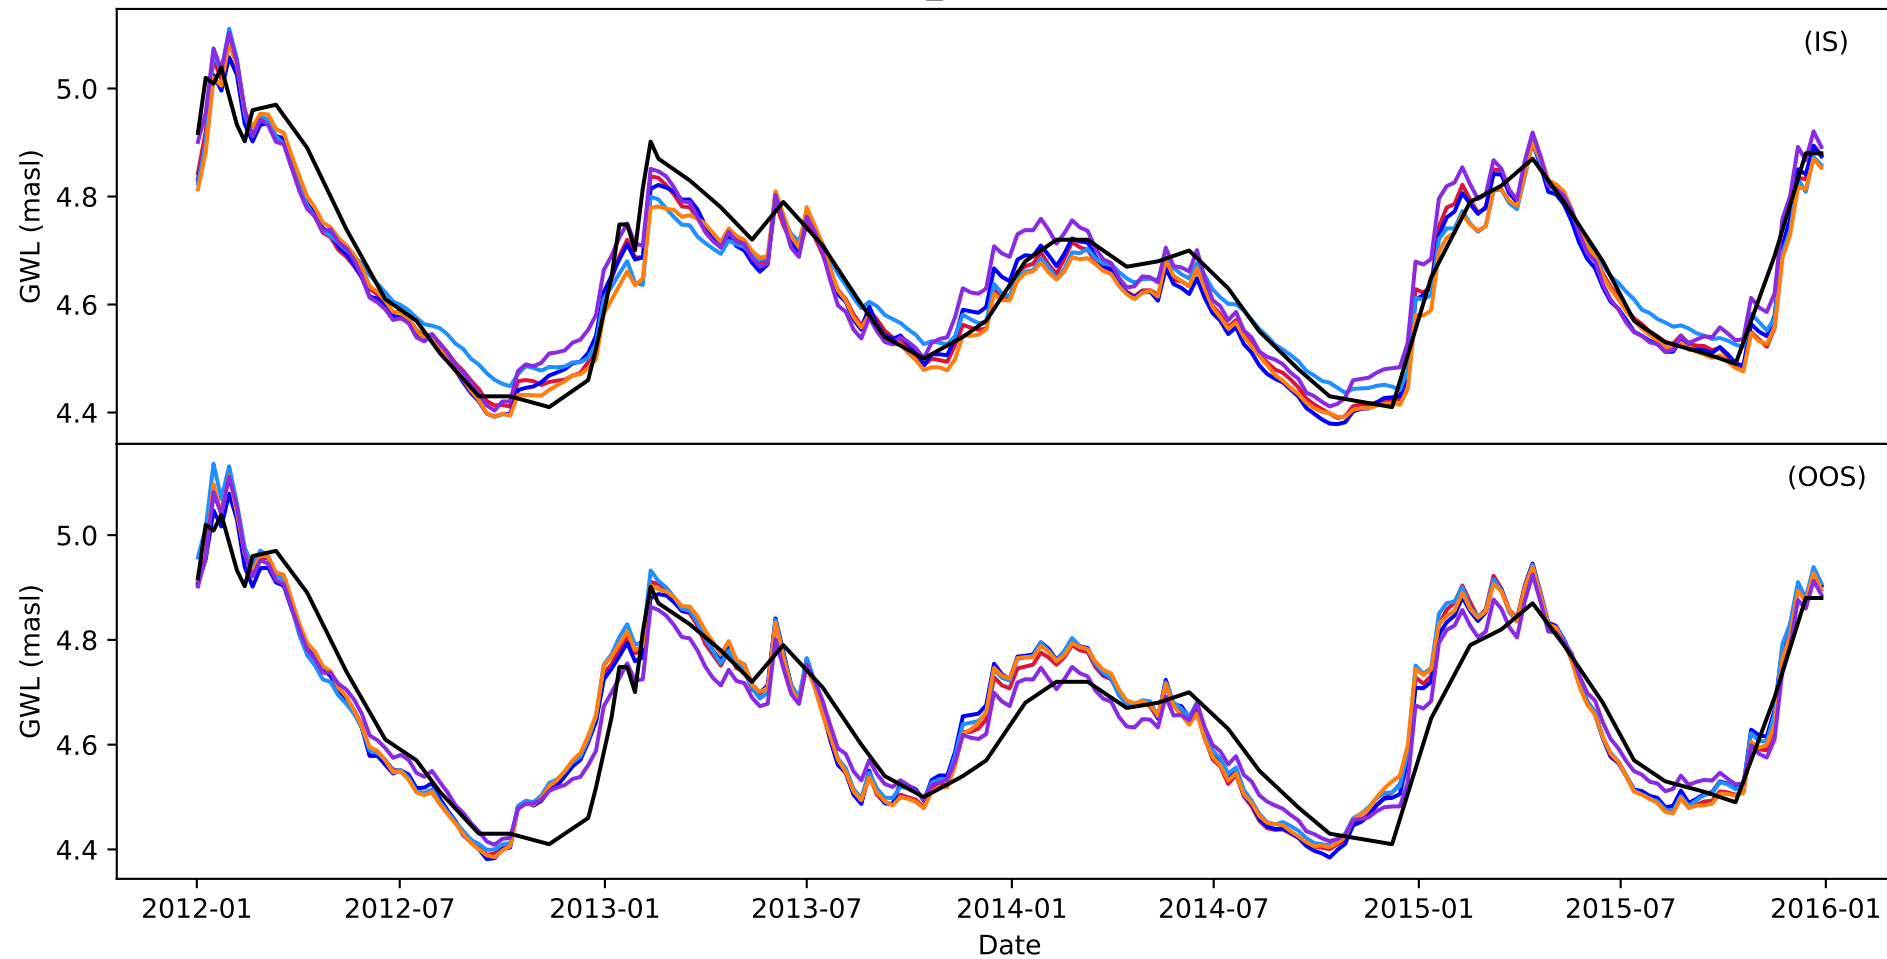

- obs
- ENVfeat (IS) NSE=0.939
- RNDfeat18 (IS) NSE=0.925
- TSfeat (IS) NSE=0.933
- RNDfeat9 (IS) NSE=0.925
- DYNonly (IS) NSE=0.923

- obs
- ENVfeat (OOS) NSE=0.873
- RNDfeat18 (OOS) NSE=0.851
- TSfeat (OOS) NSE=0.867
- RNDfeat8 (OOS) NSE=0.851
- DYNonly (OOS) NSE=0.924



NI\_600041871

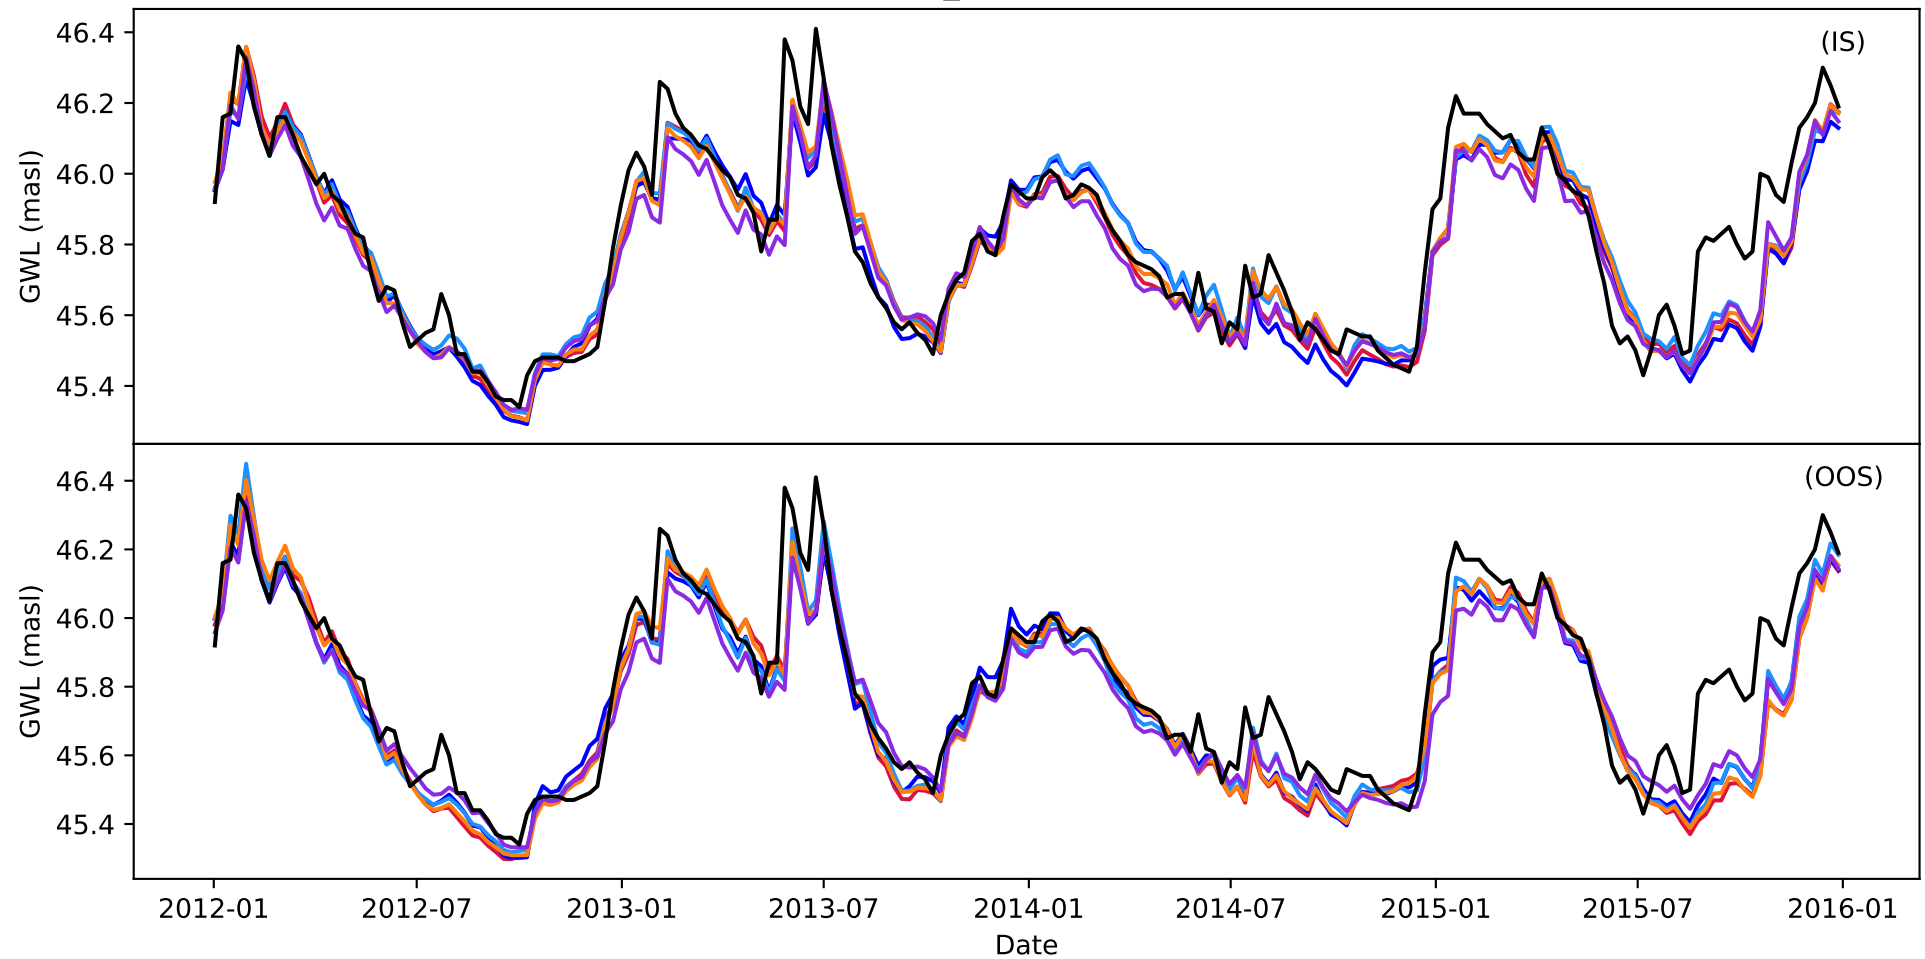

- obs
- ENVfeat (IS) NSE=0.828
- RNDfeat18 (IS) NSE=0.836
- TSfeat (IS) NSE=0.808
- RNDfeat9 (IS) NSE=0.836
- DYNOnly (IS) NSE=0.818

- obs
- ENVfeat (OOS) NSE=0.772
- RNDfeat18 (OOS) NSE=0.794
- TSfeat (OOS) NSE=0.792
- RNDfeat8 (OOS) NSE=0.794
- DYNOnly (OOS) NSE=0.797

NW\_60090169

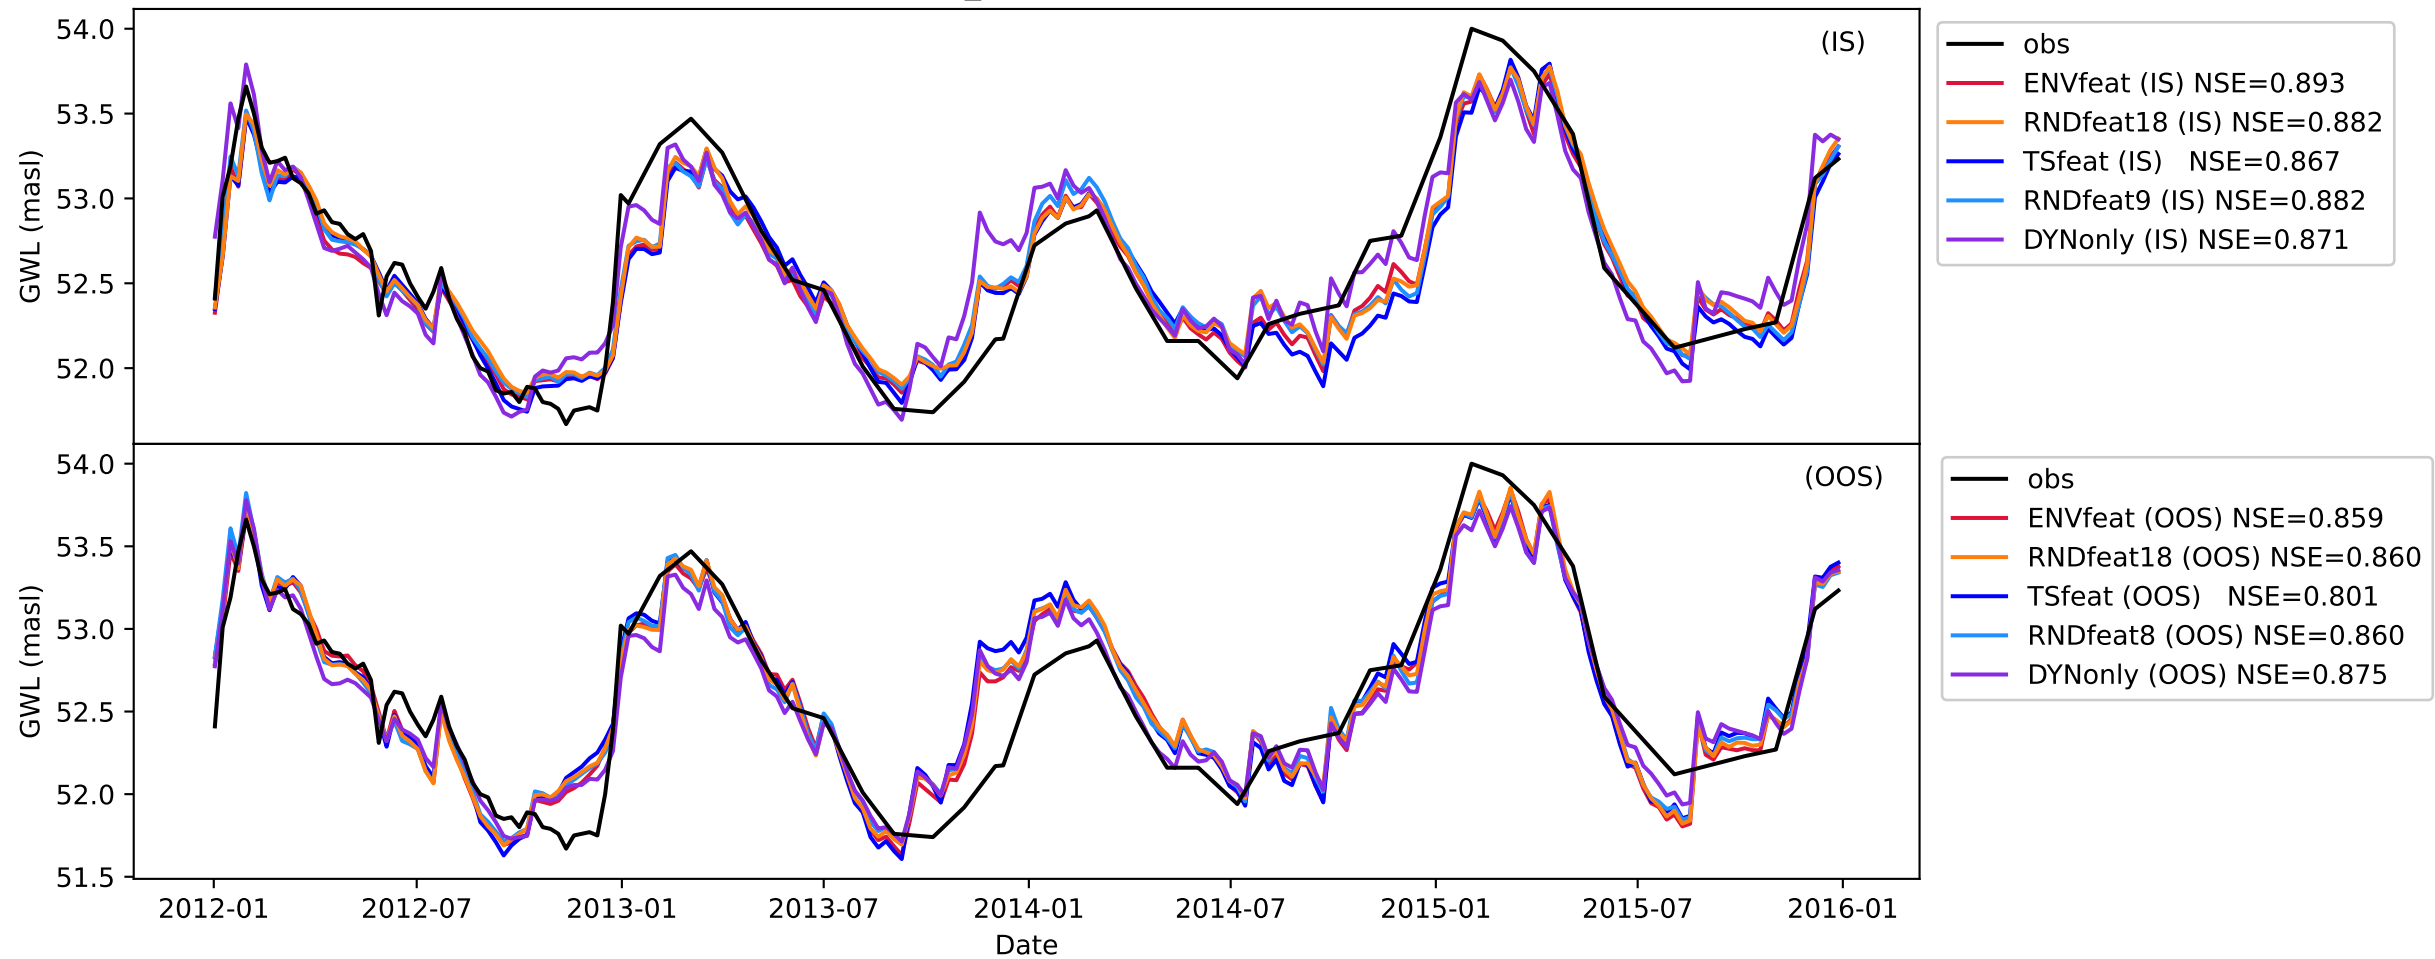

NW\_60240258

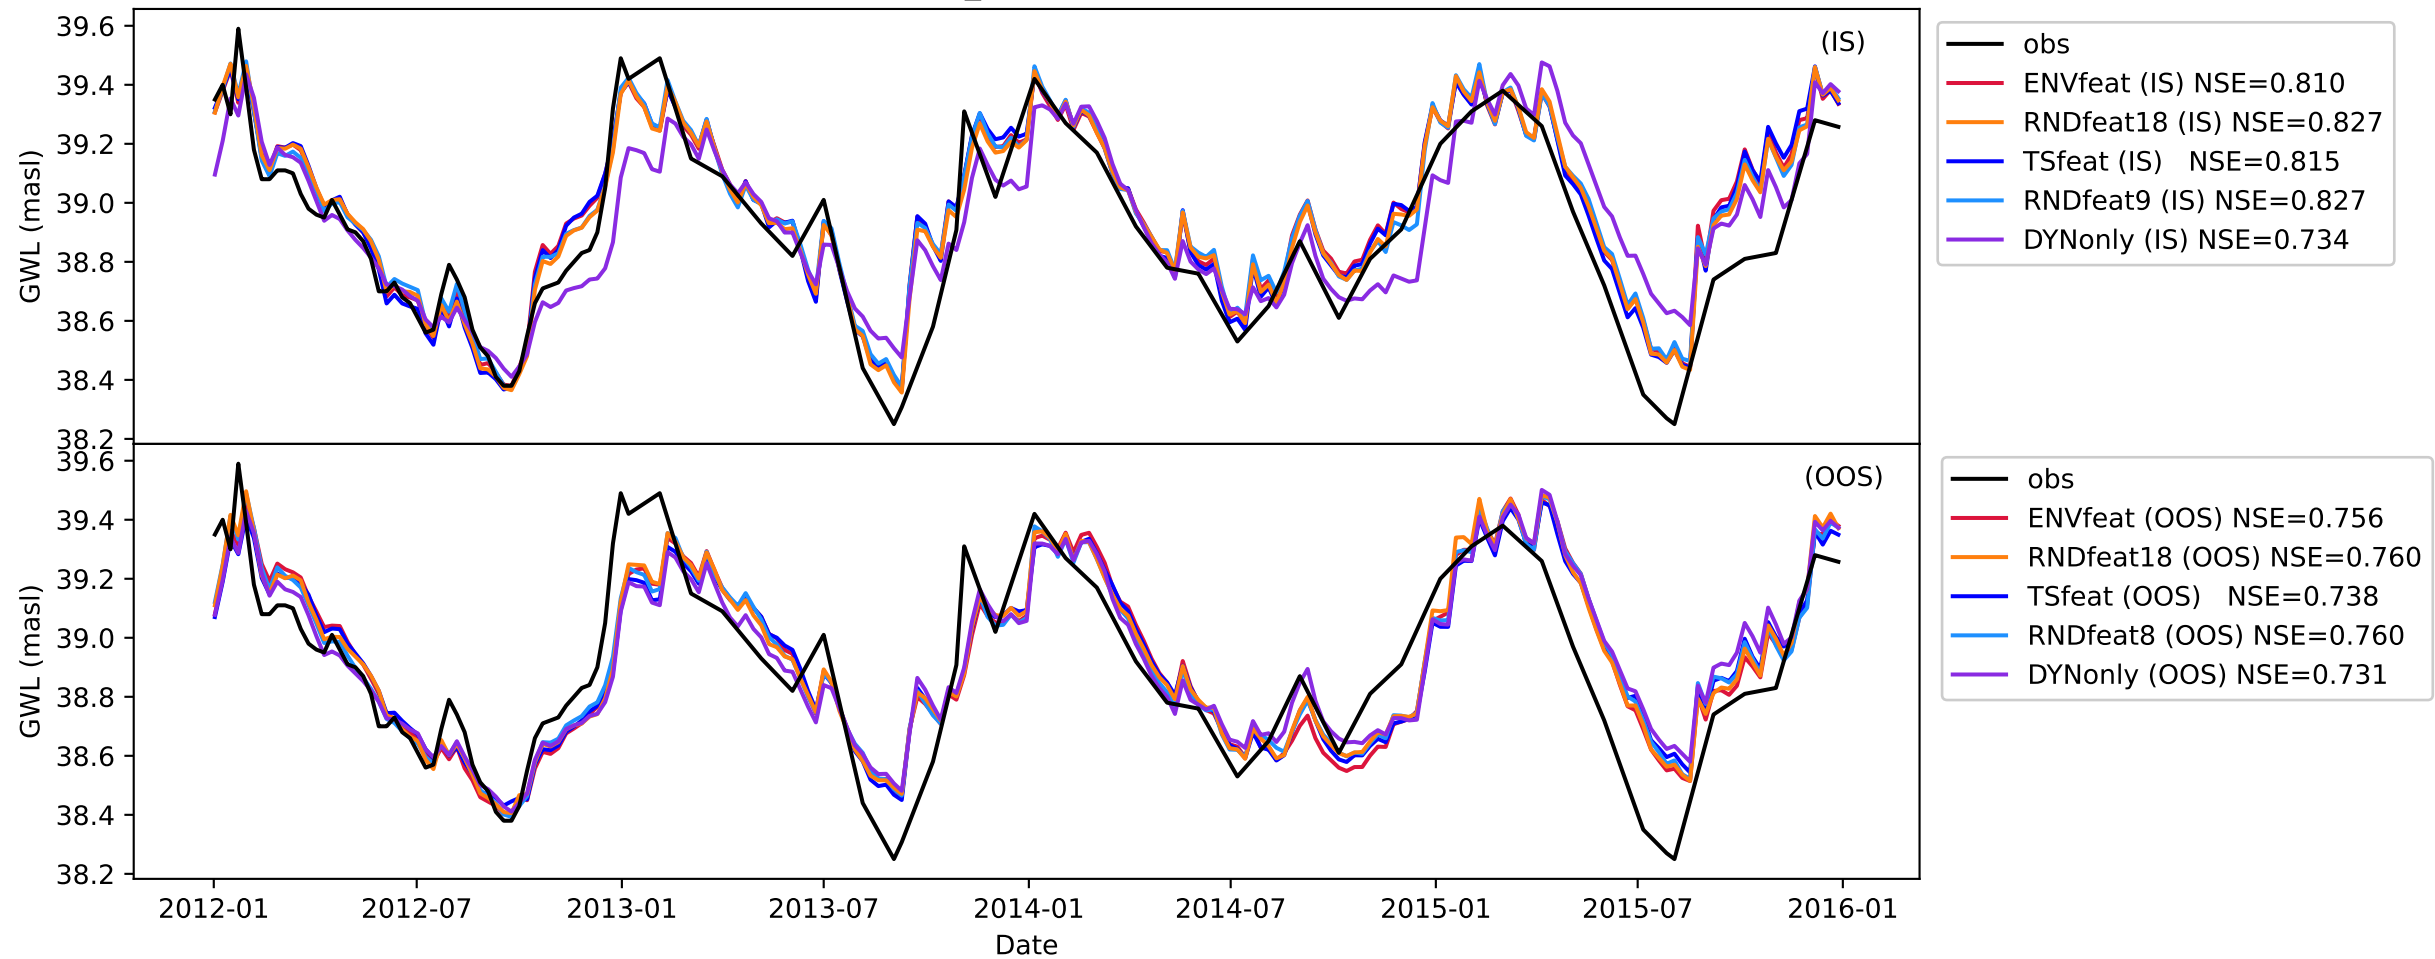

NW\_8000186

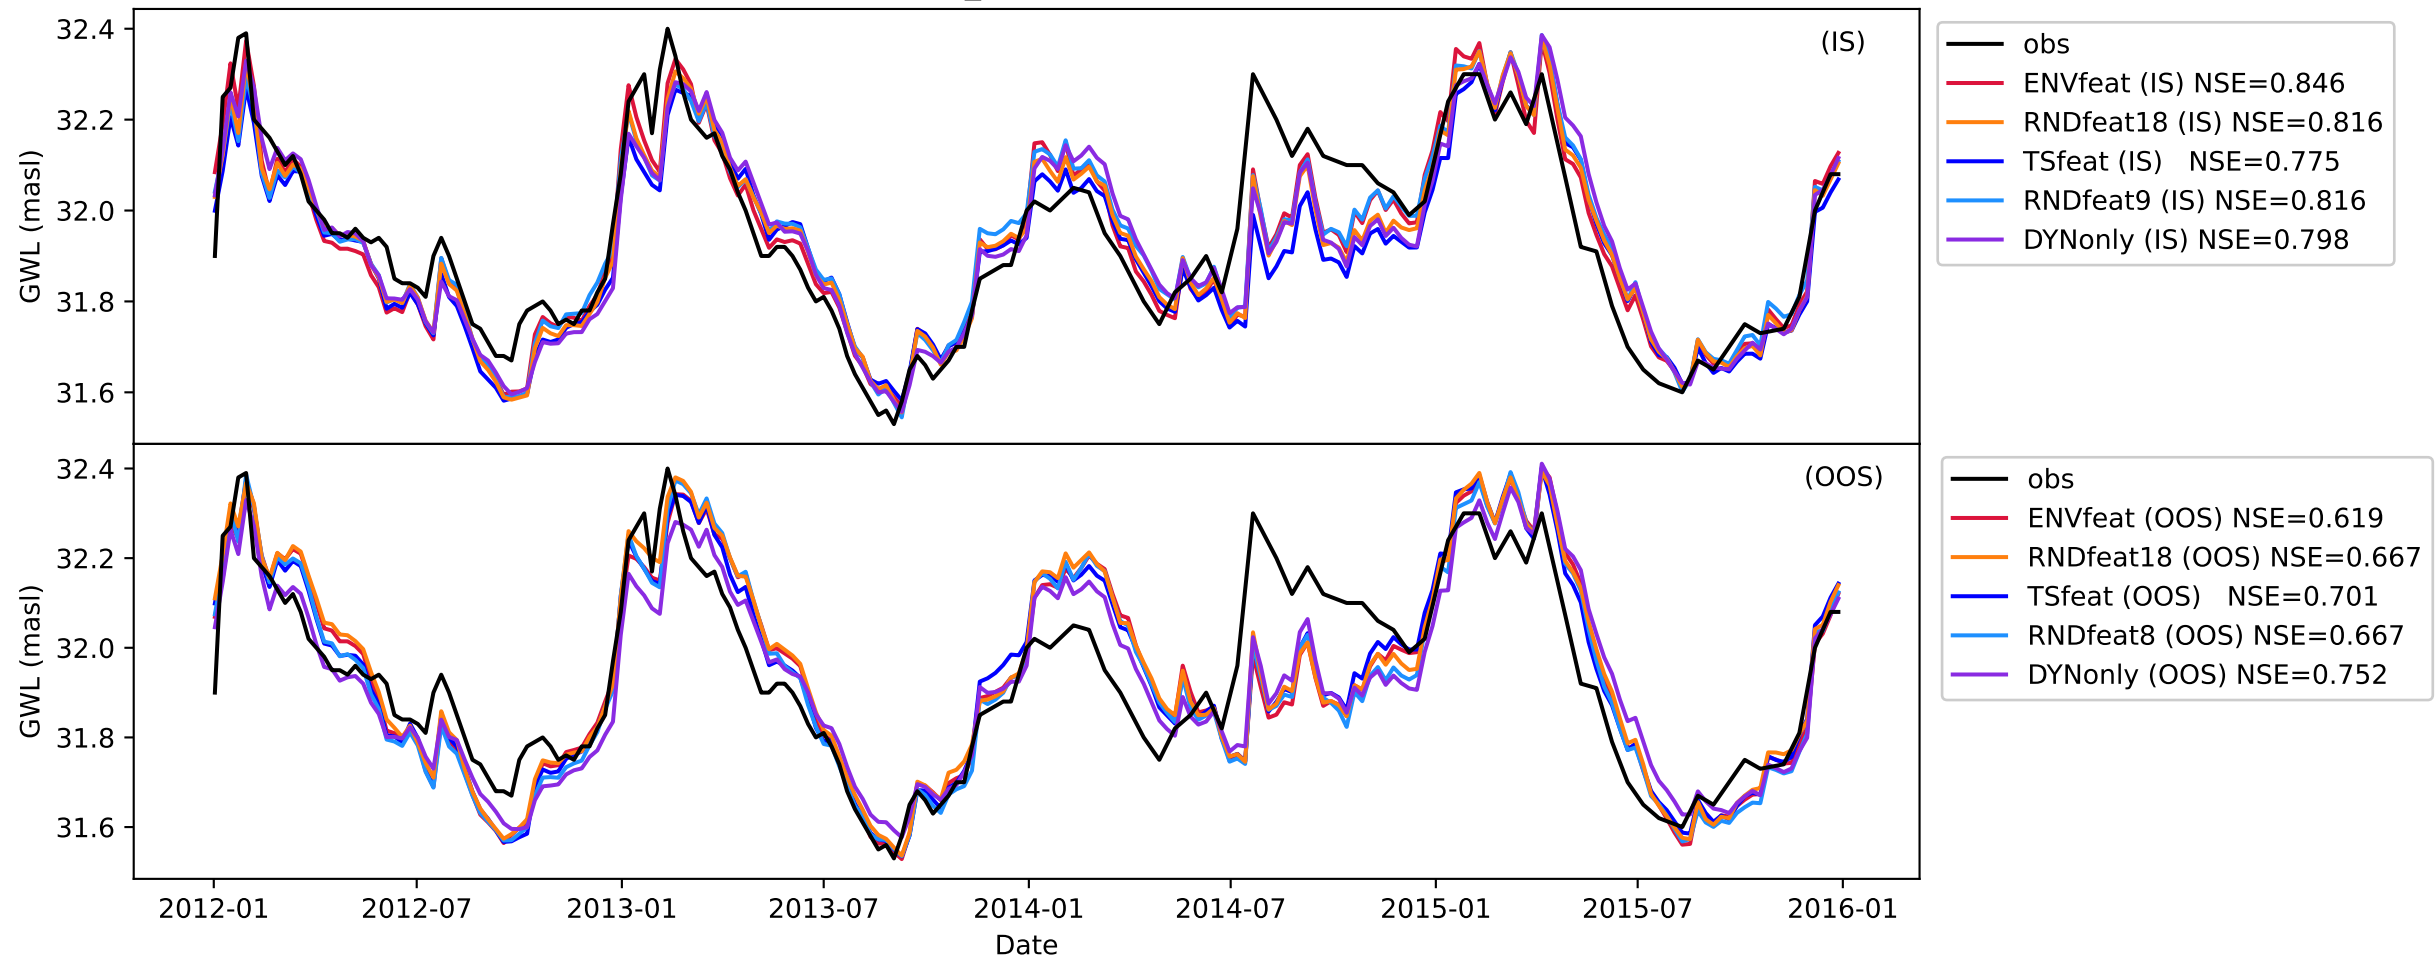

NW\_80300376

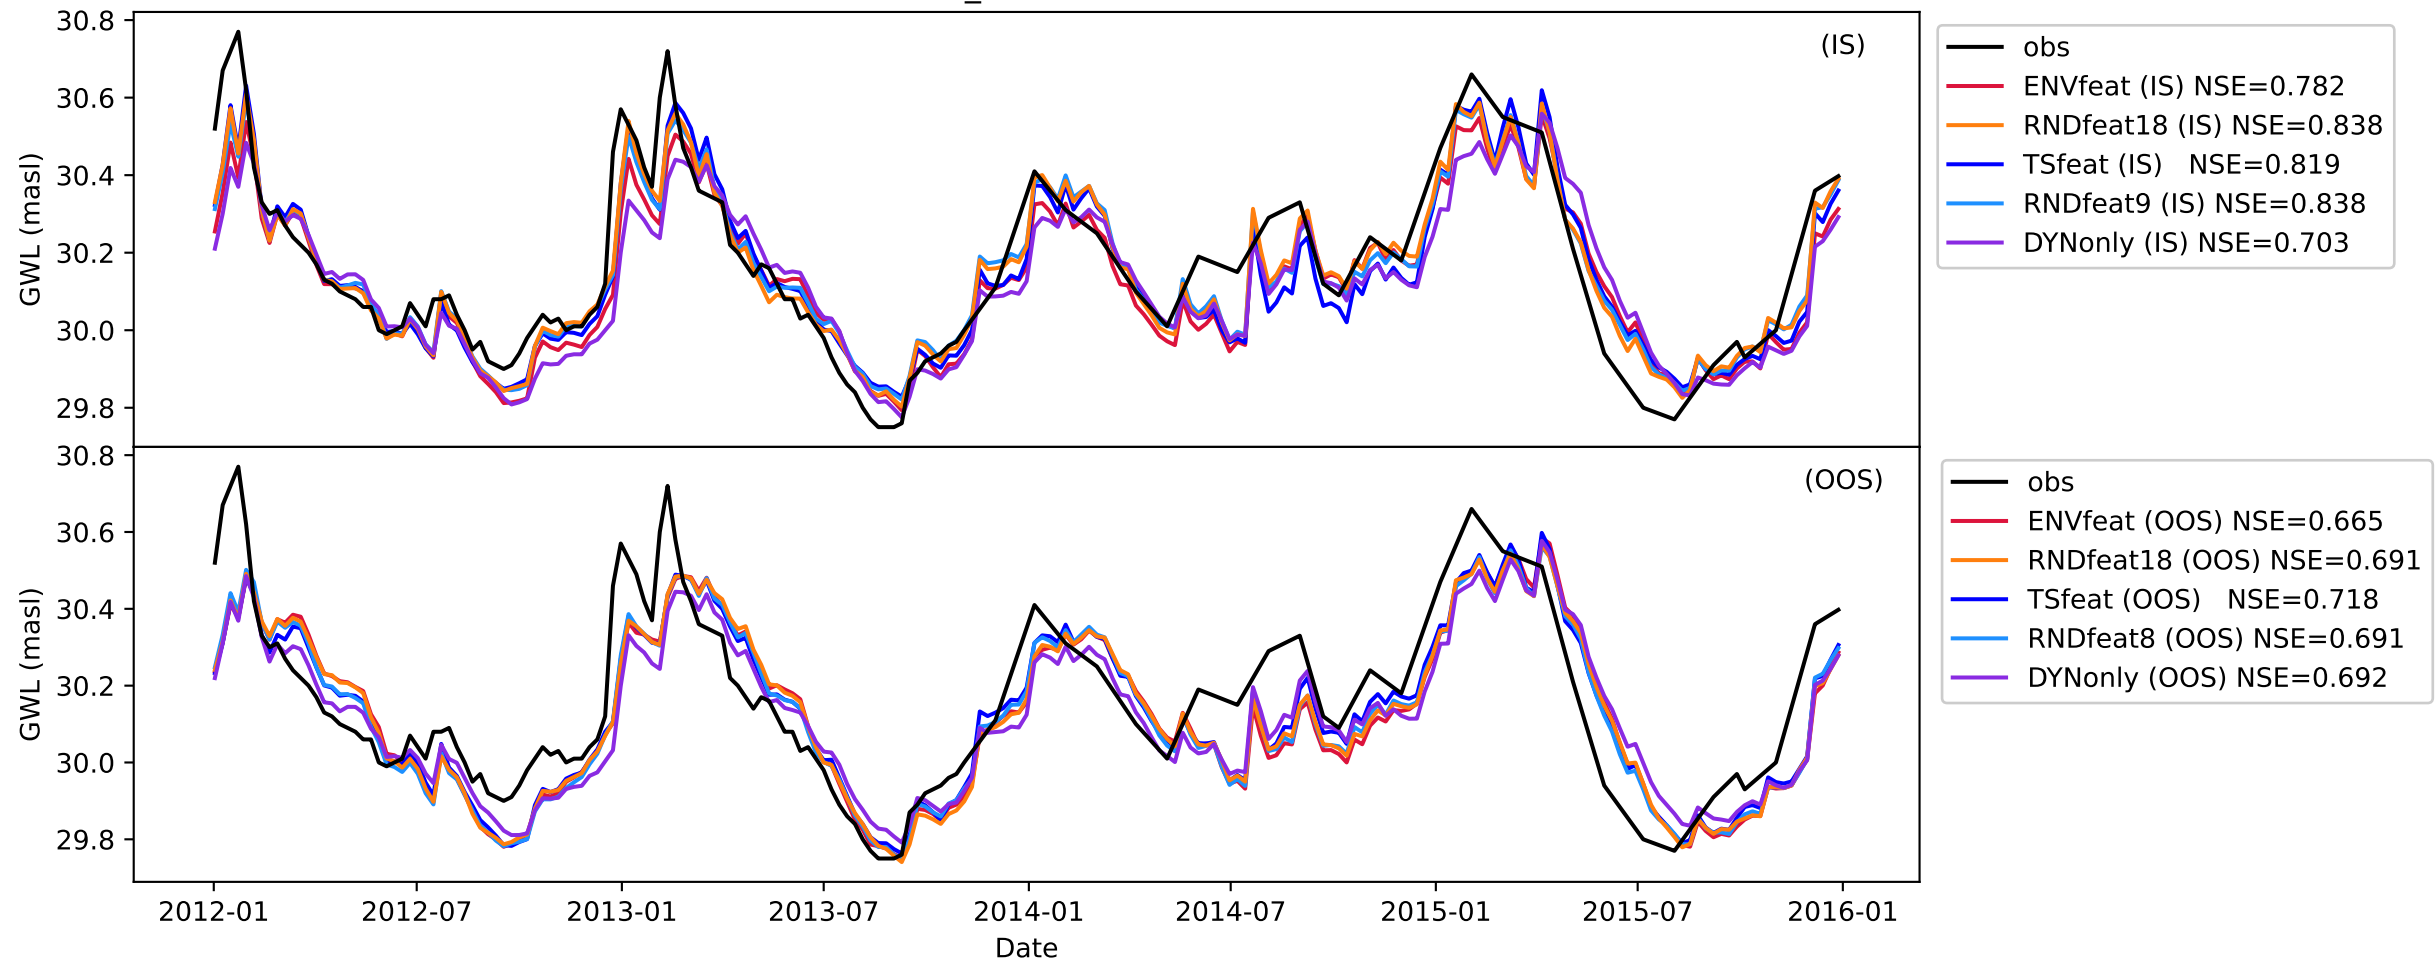

NW\_91163705

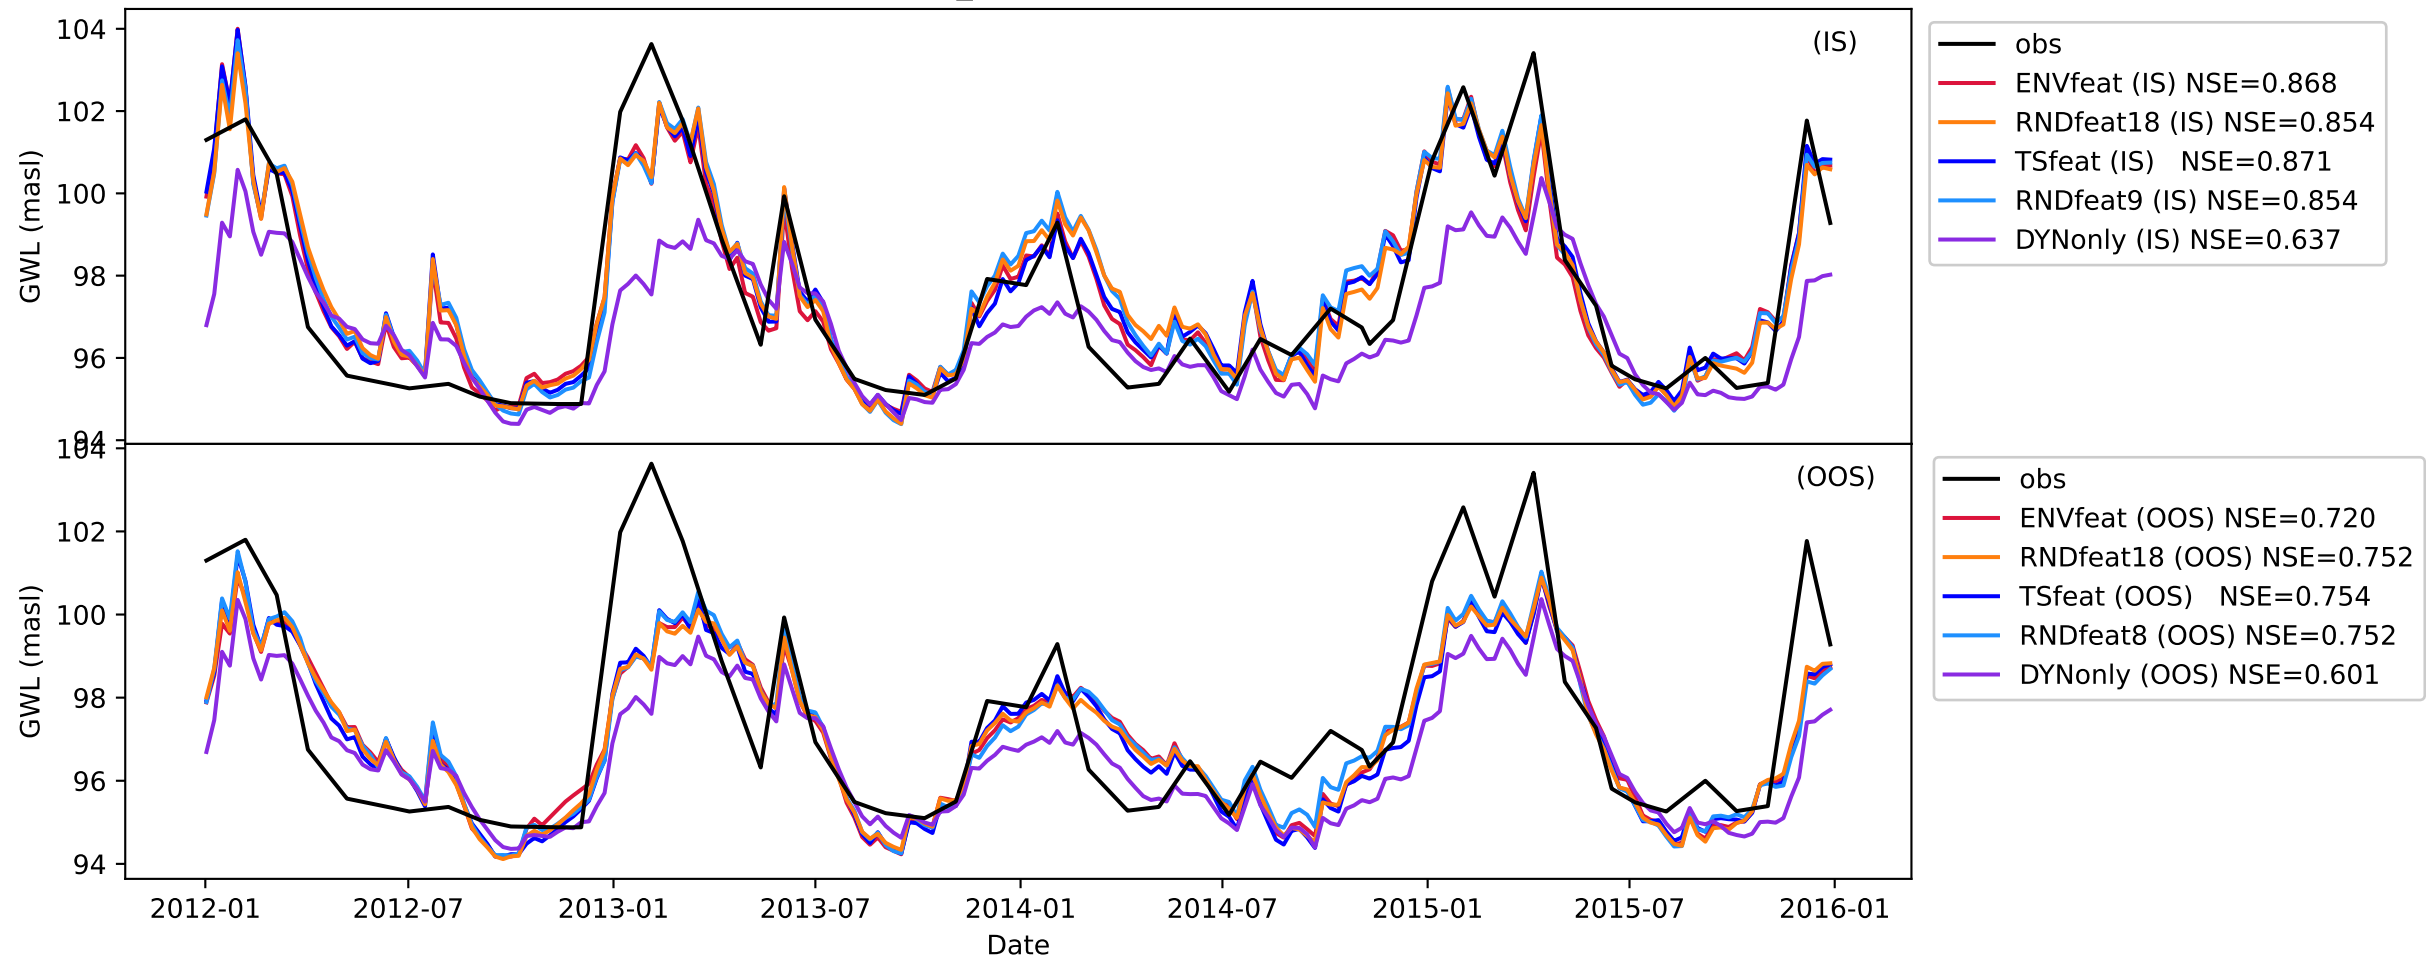

NW\_91174909

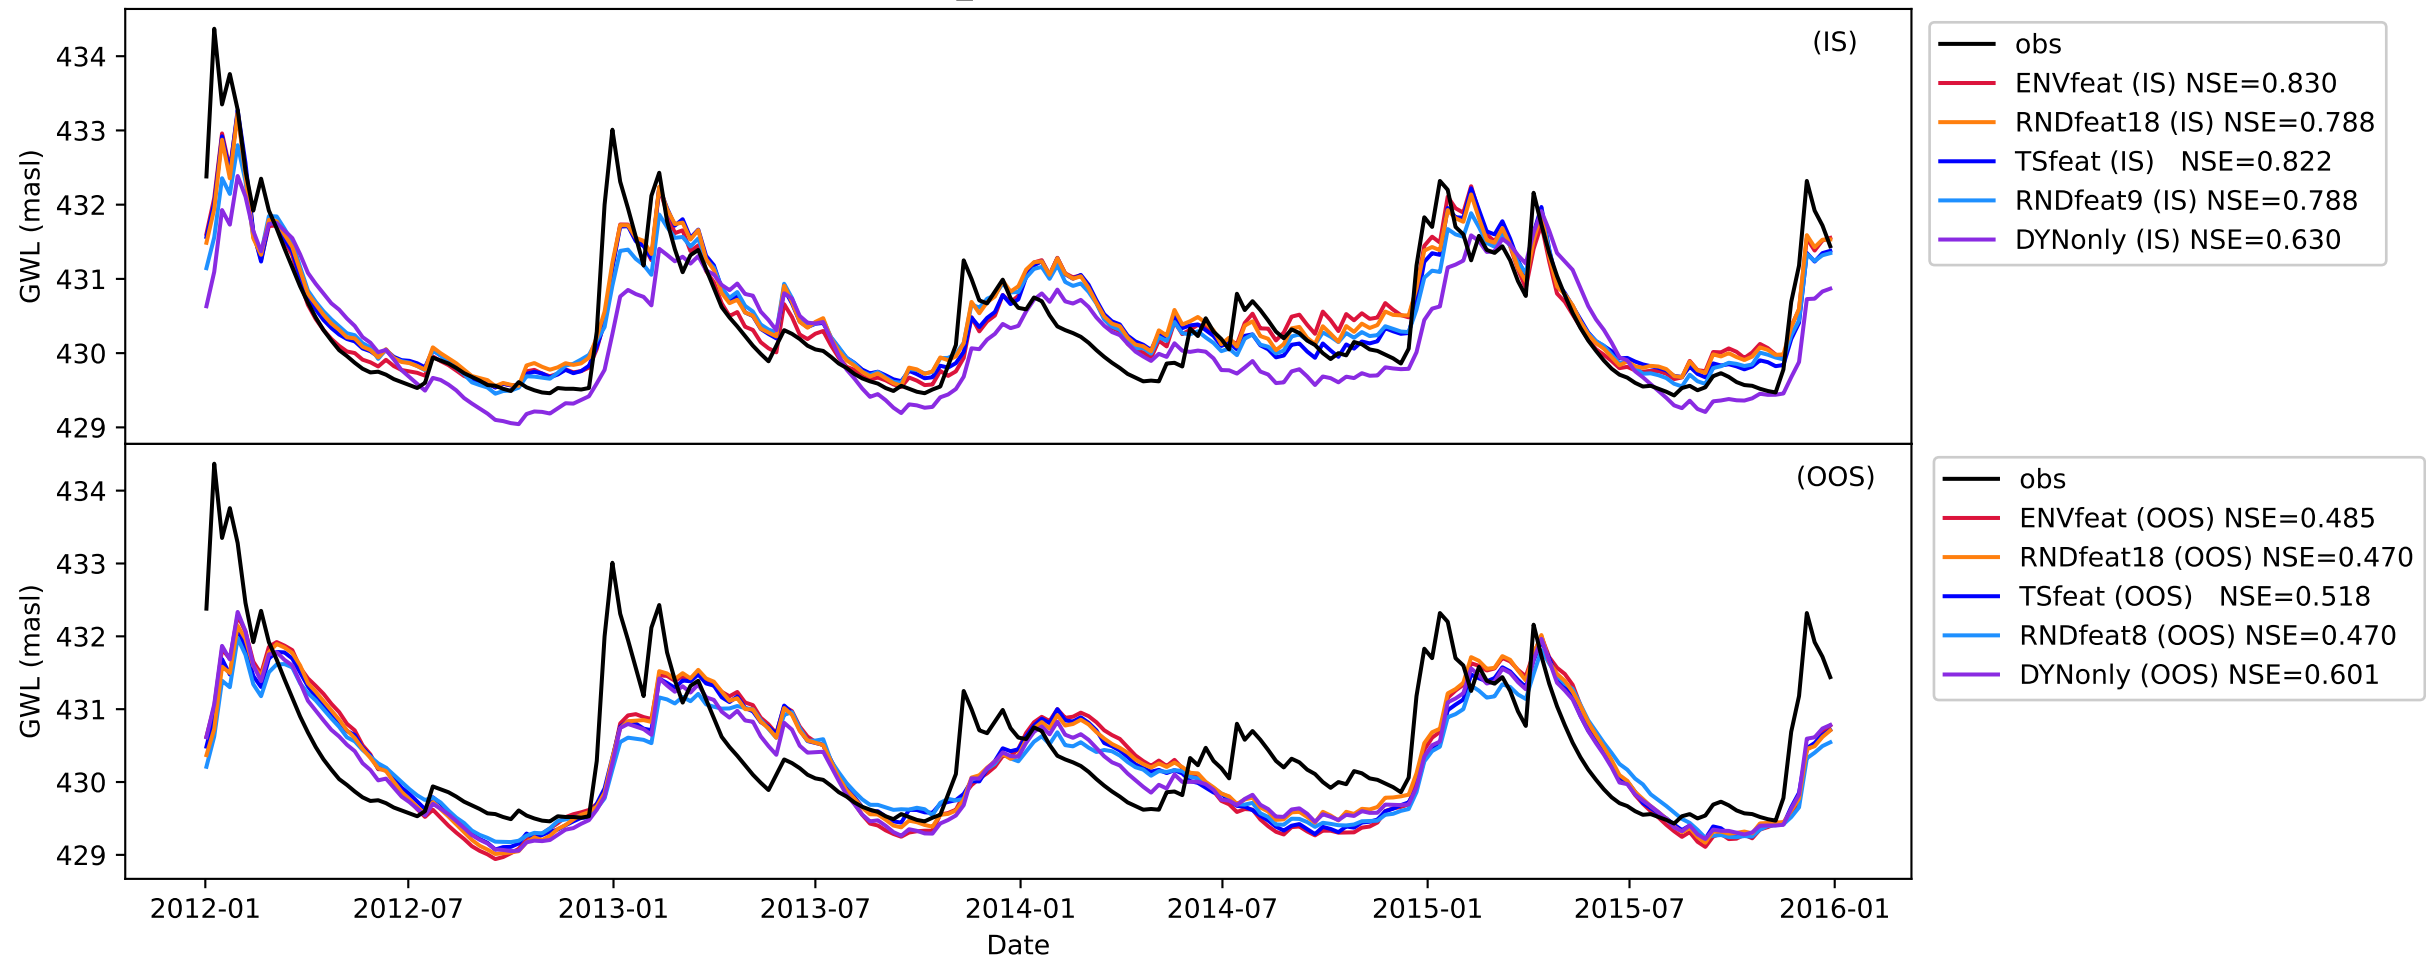

NW\_100140142

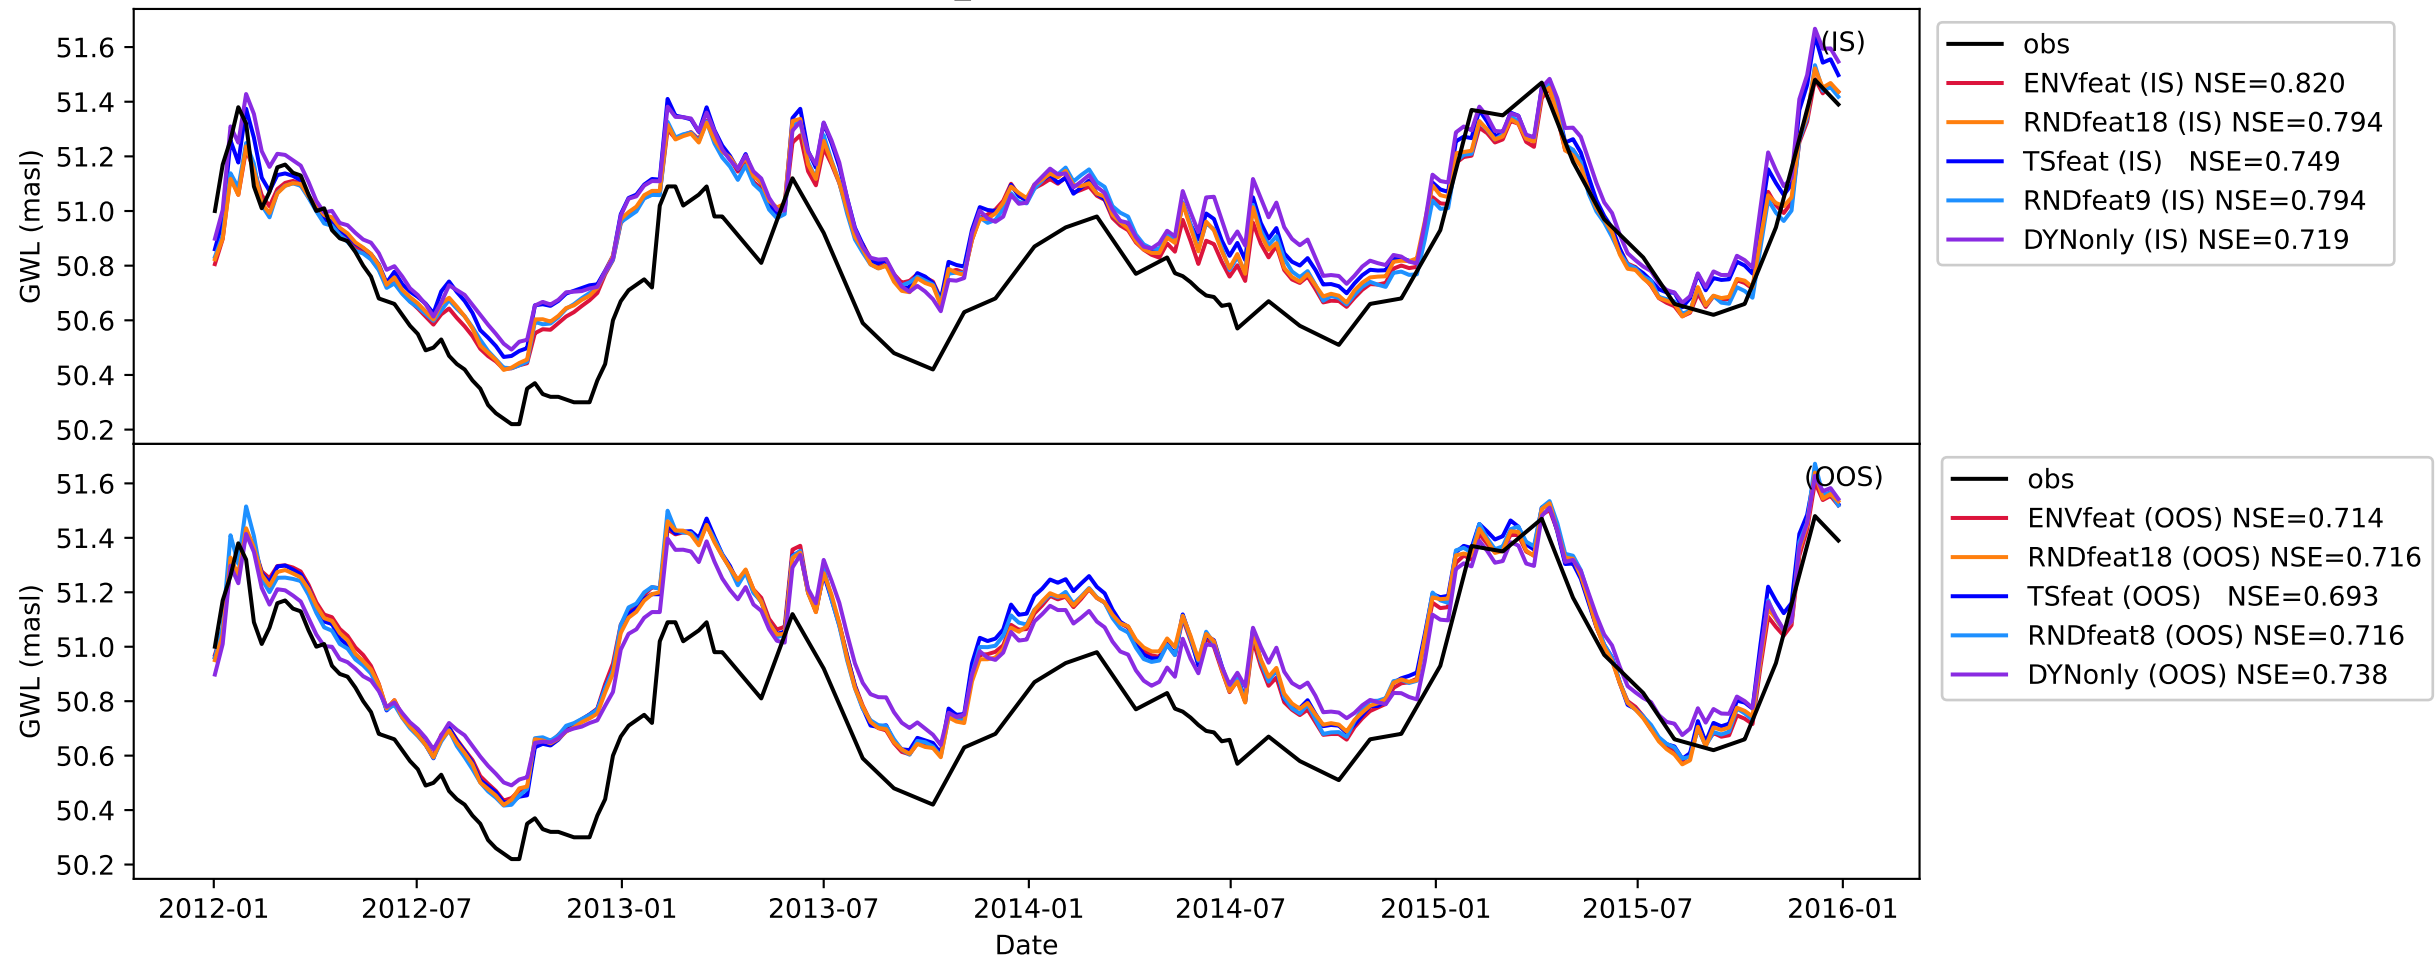



NW\_100140762

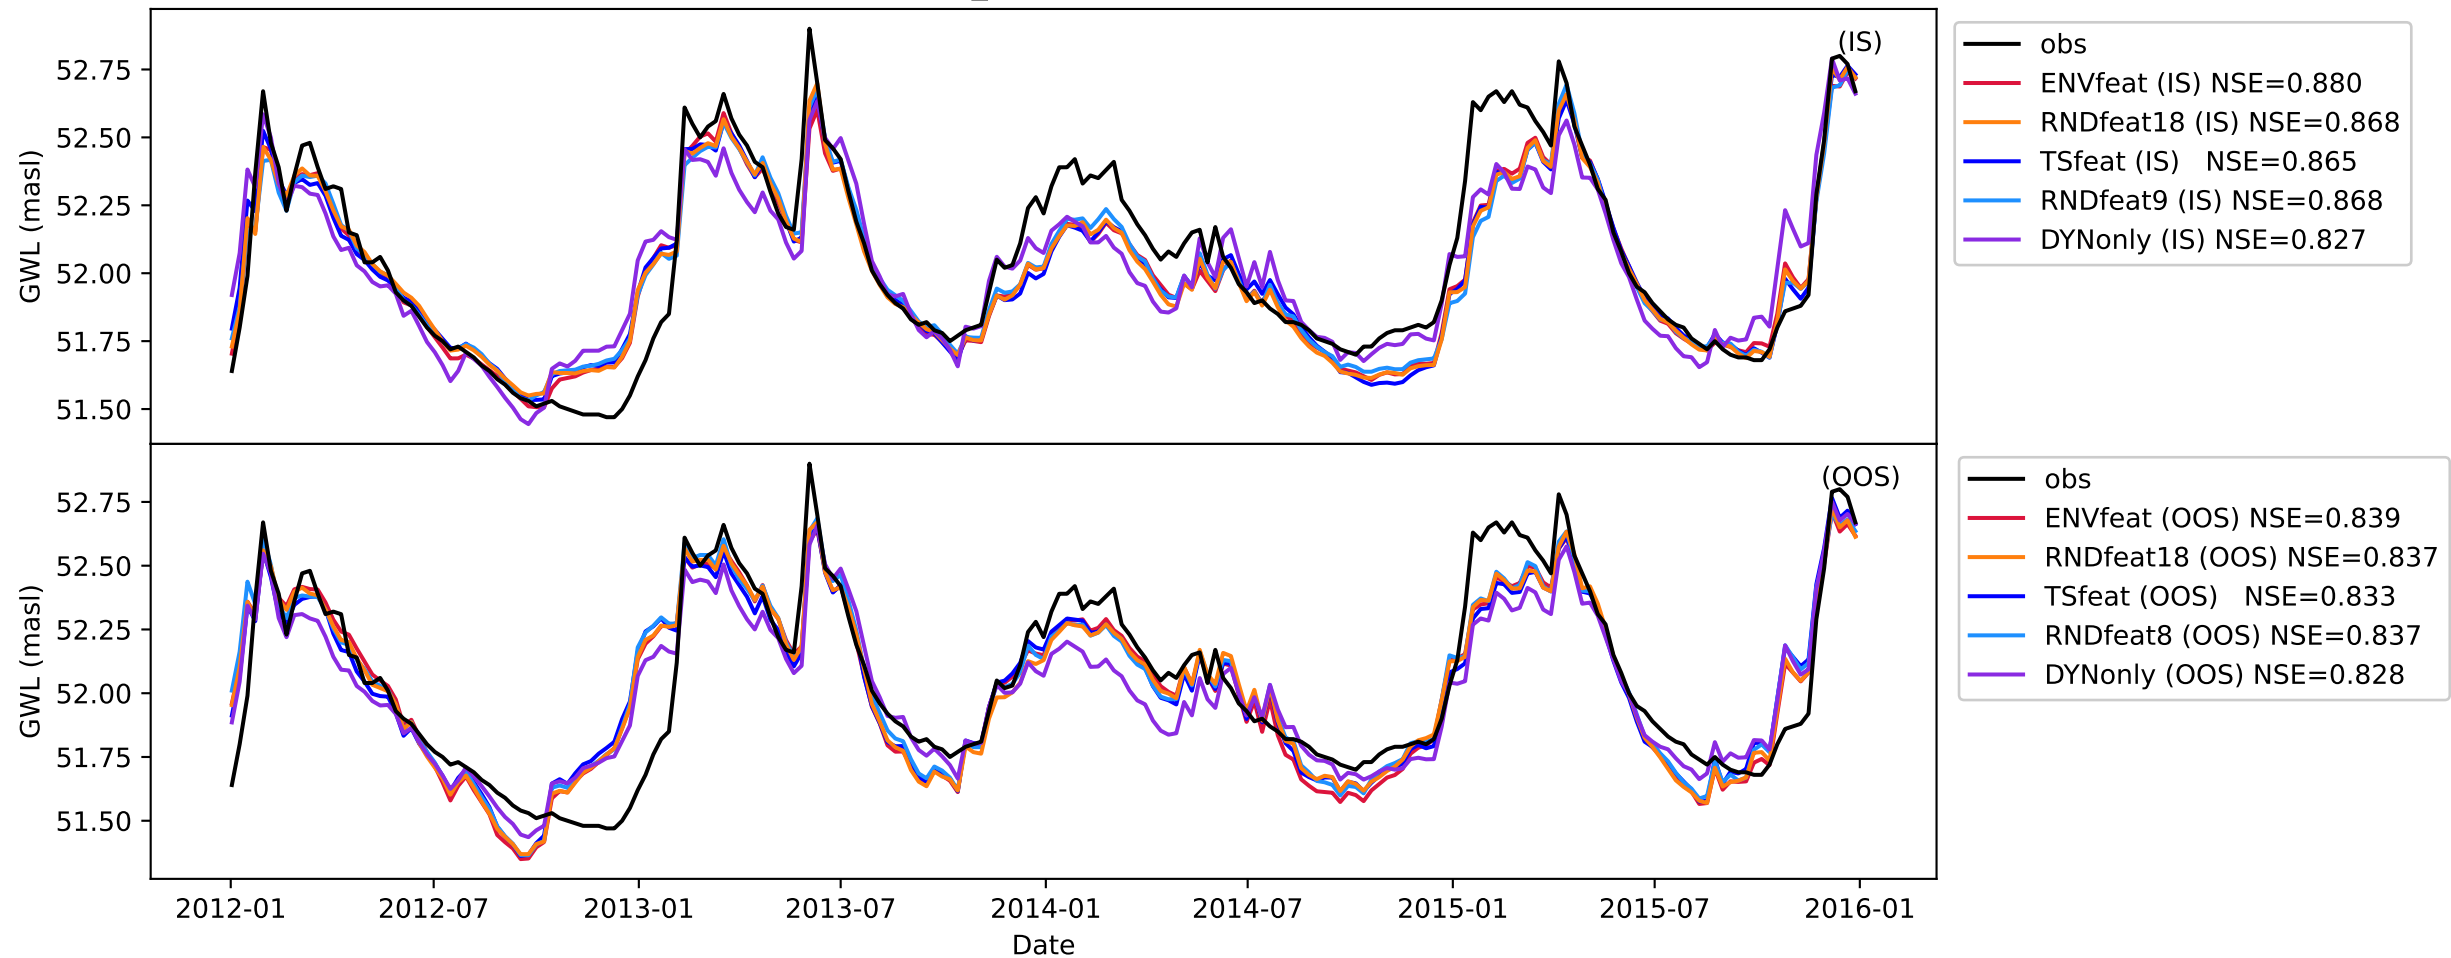

NW\_110040028

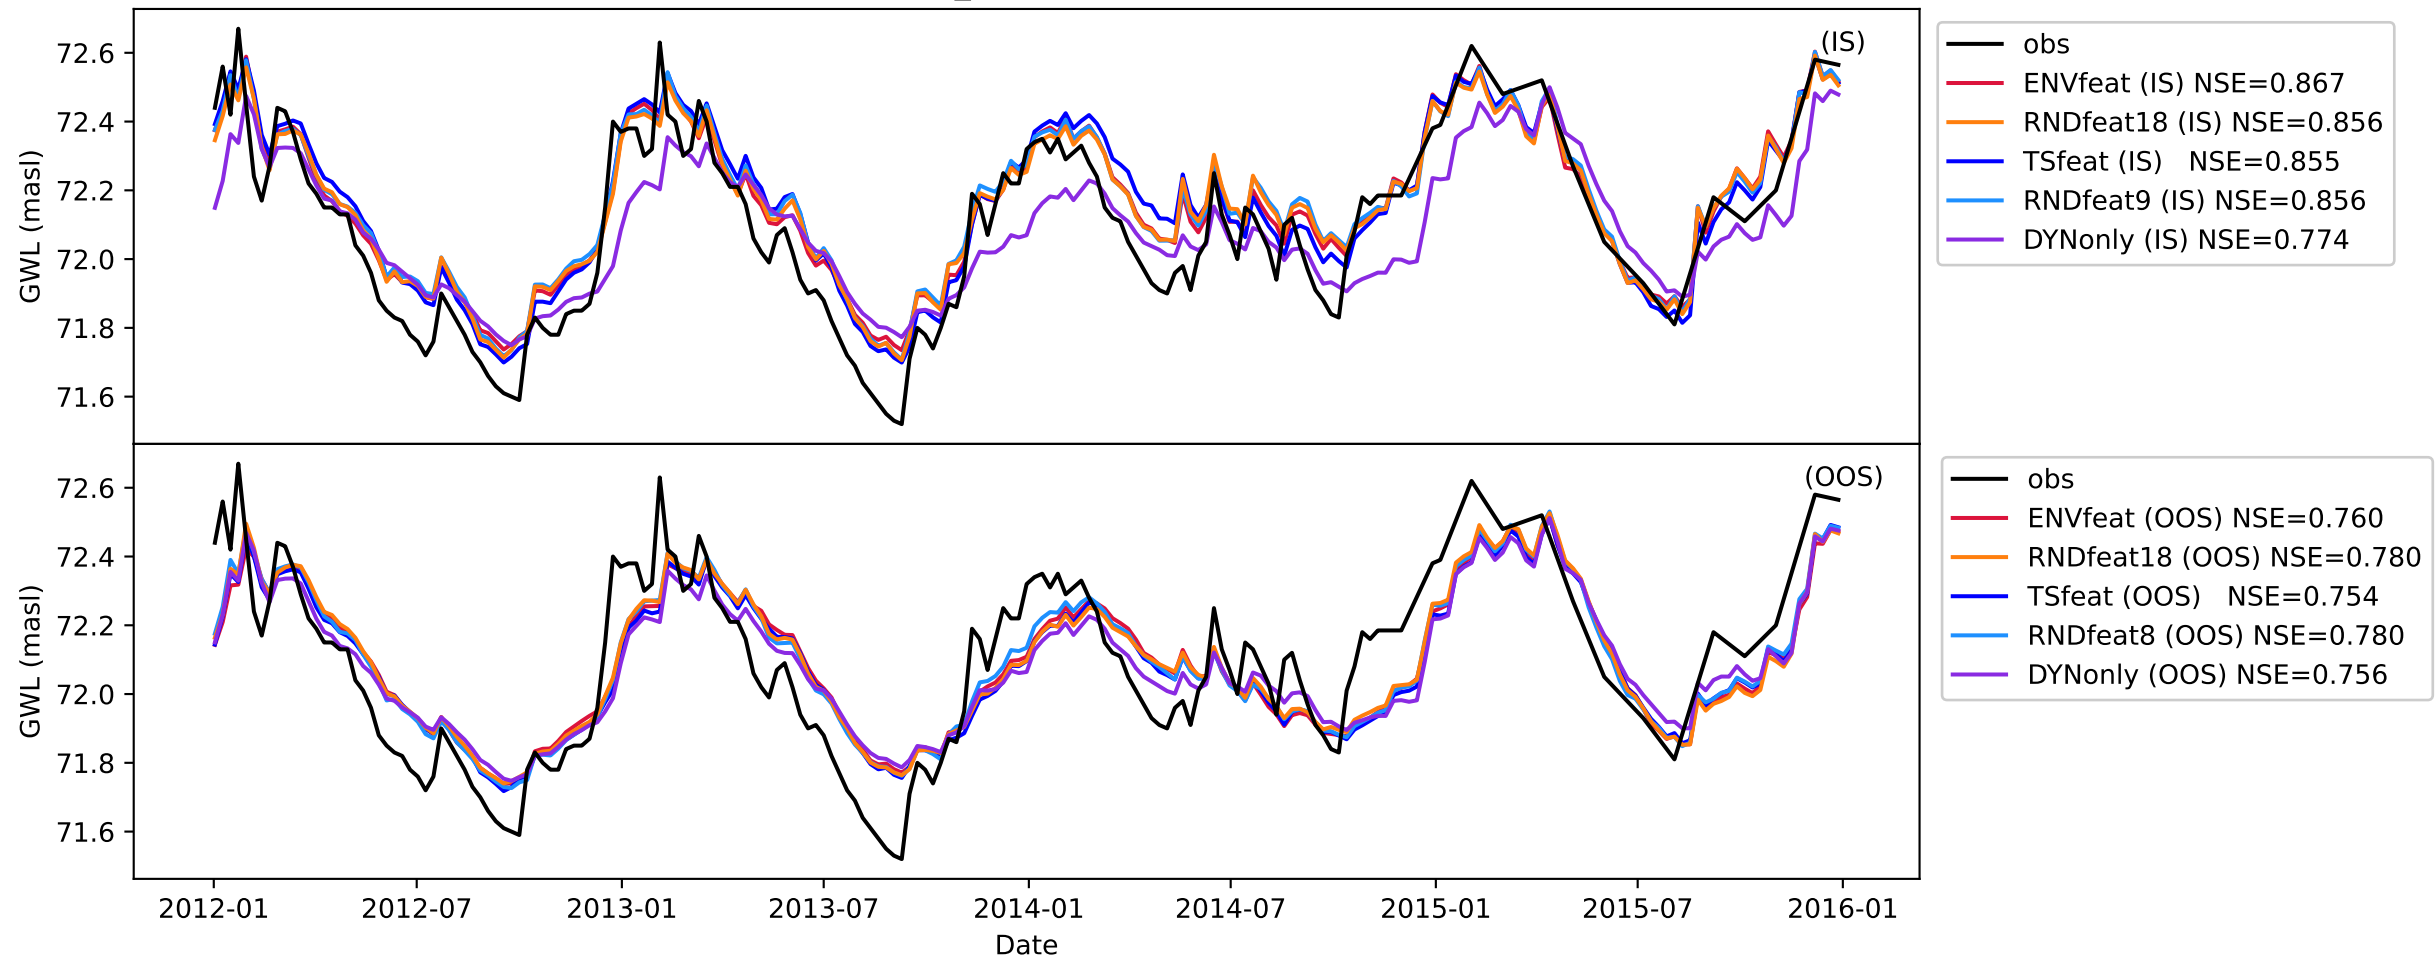

NW\_110040041

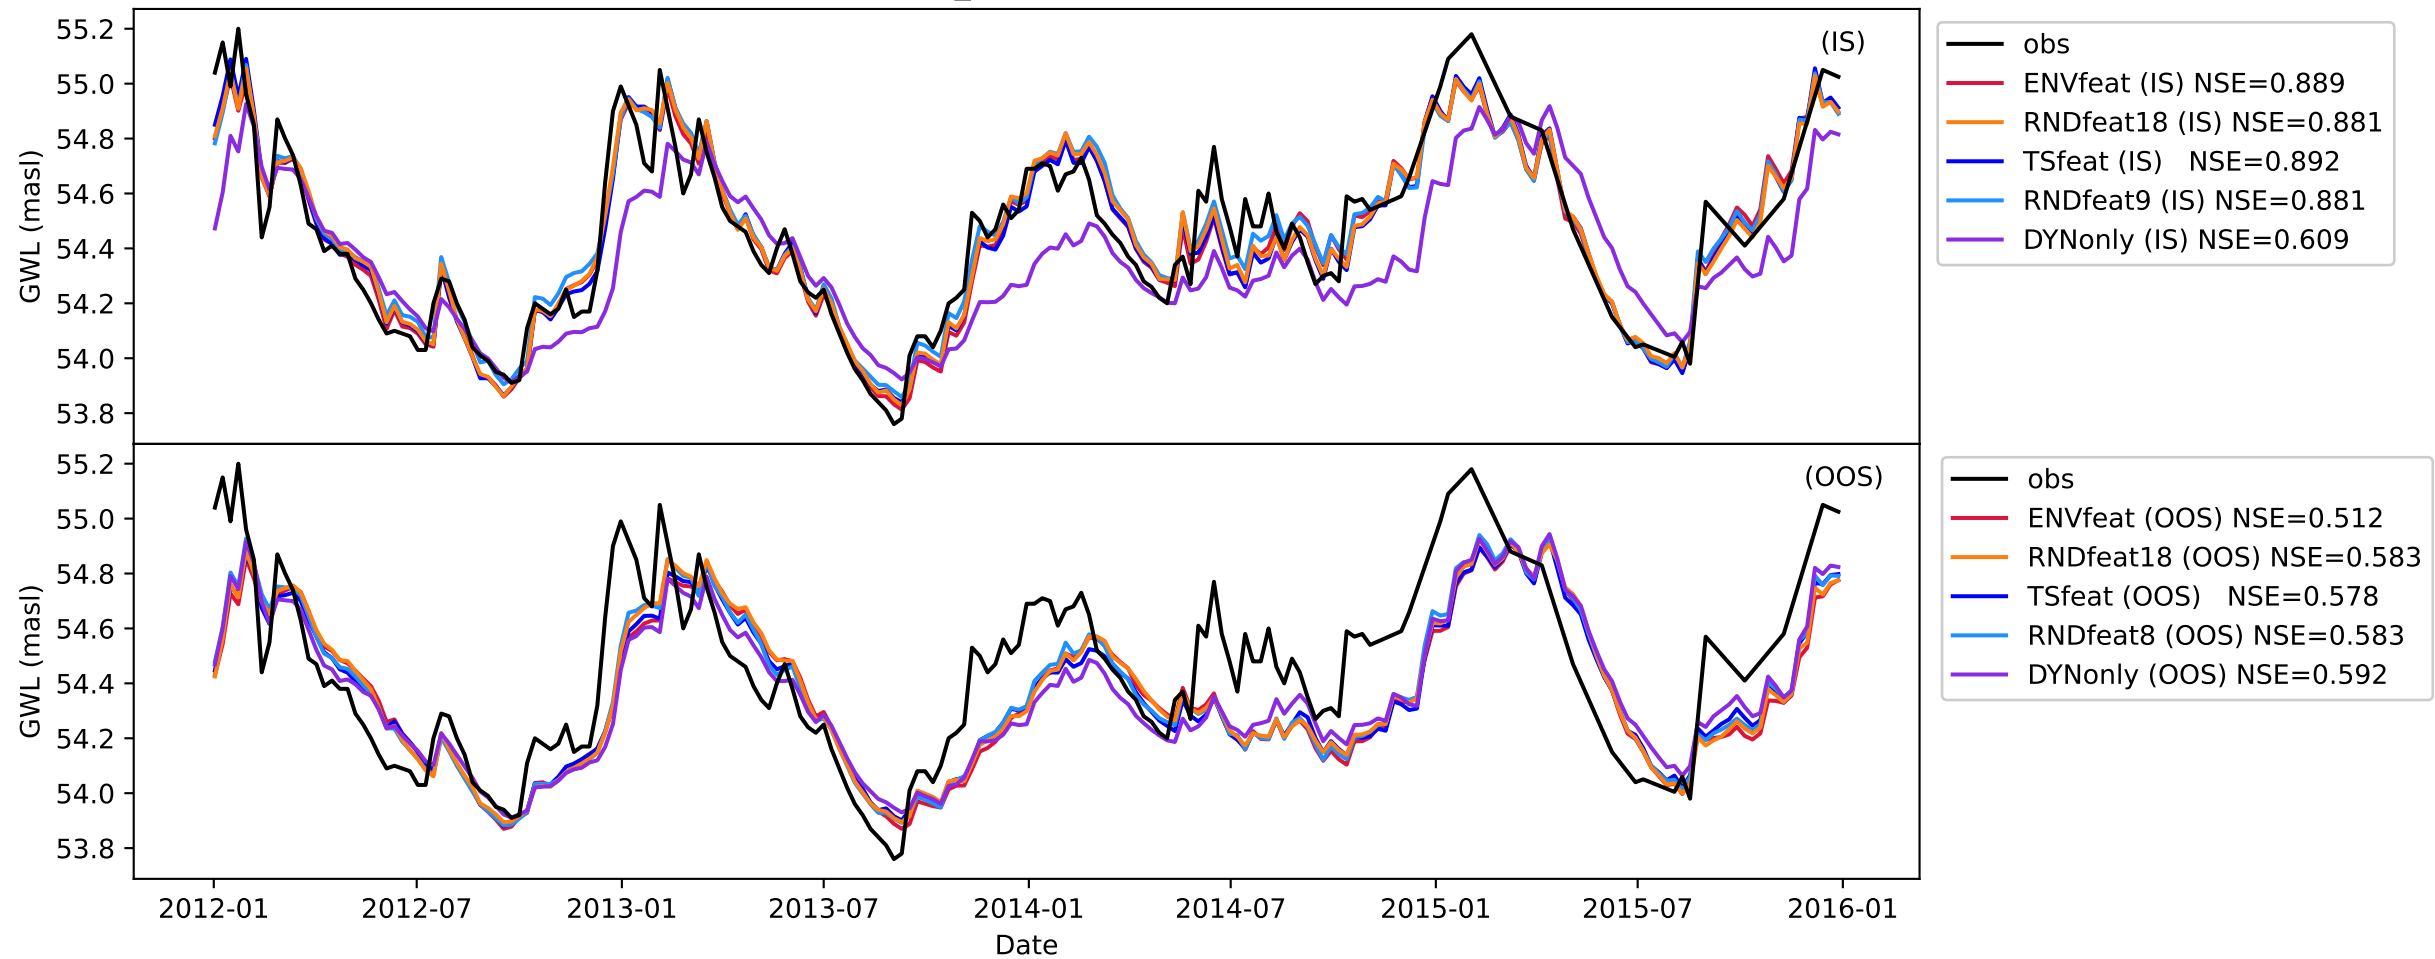

NW\_110060143

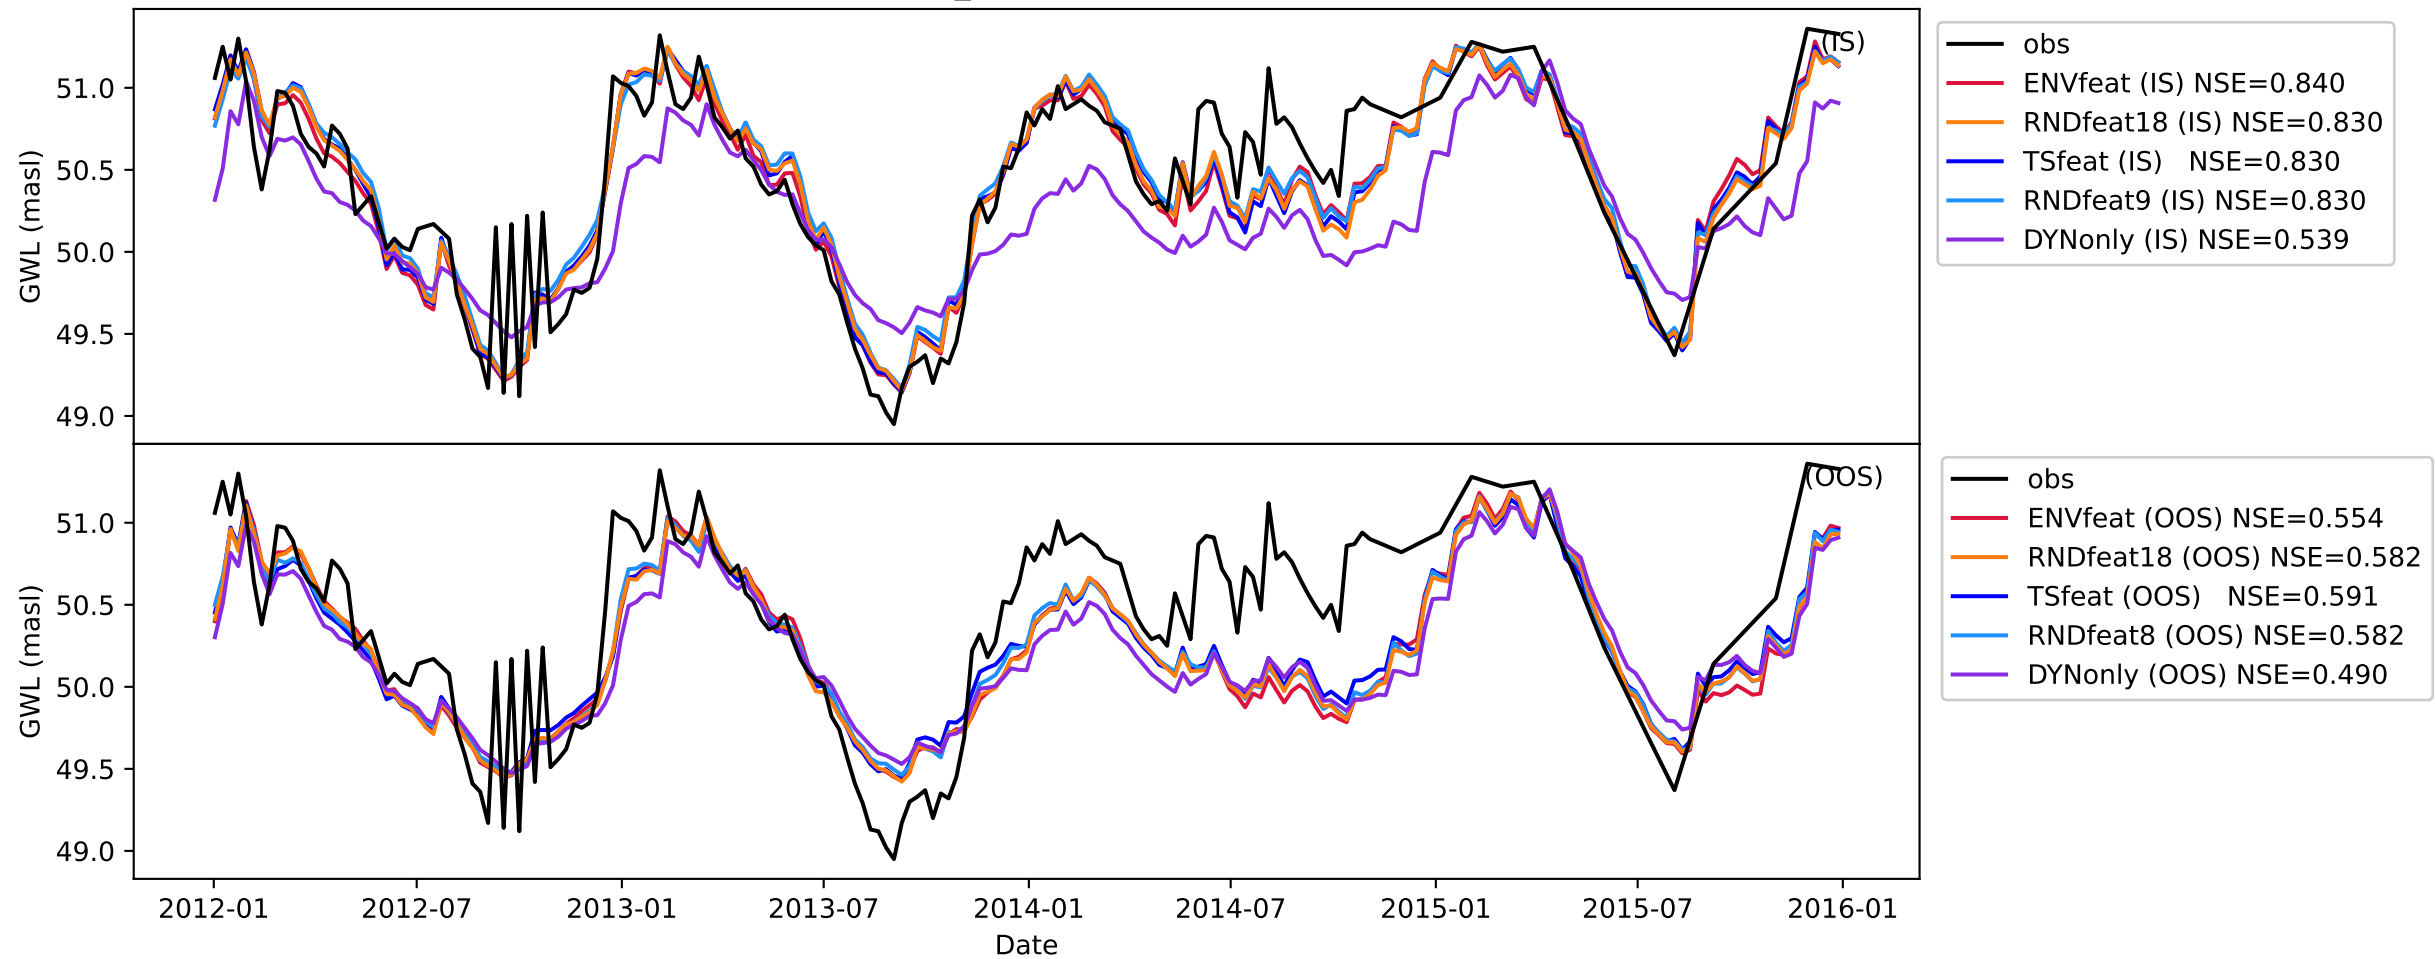

NW\_110240017

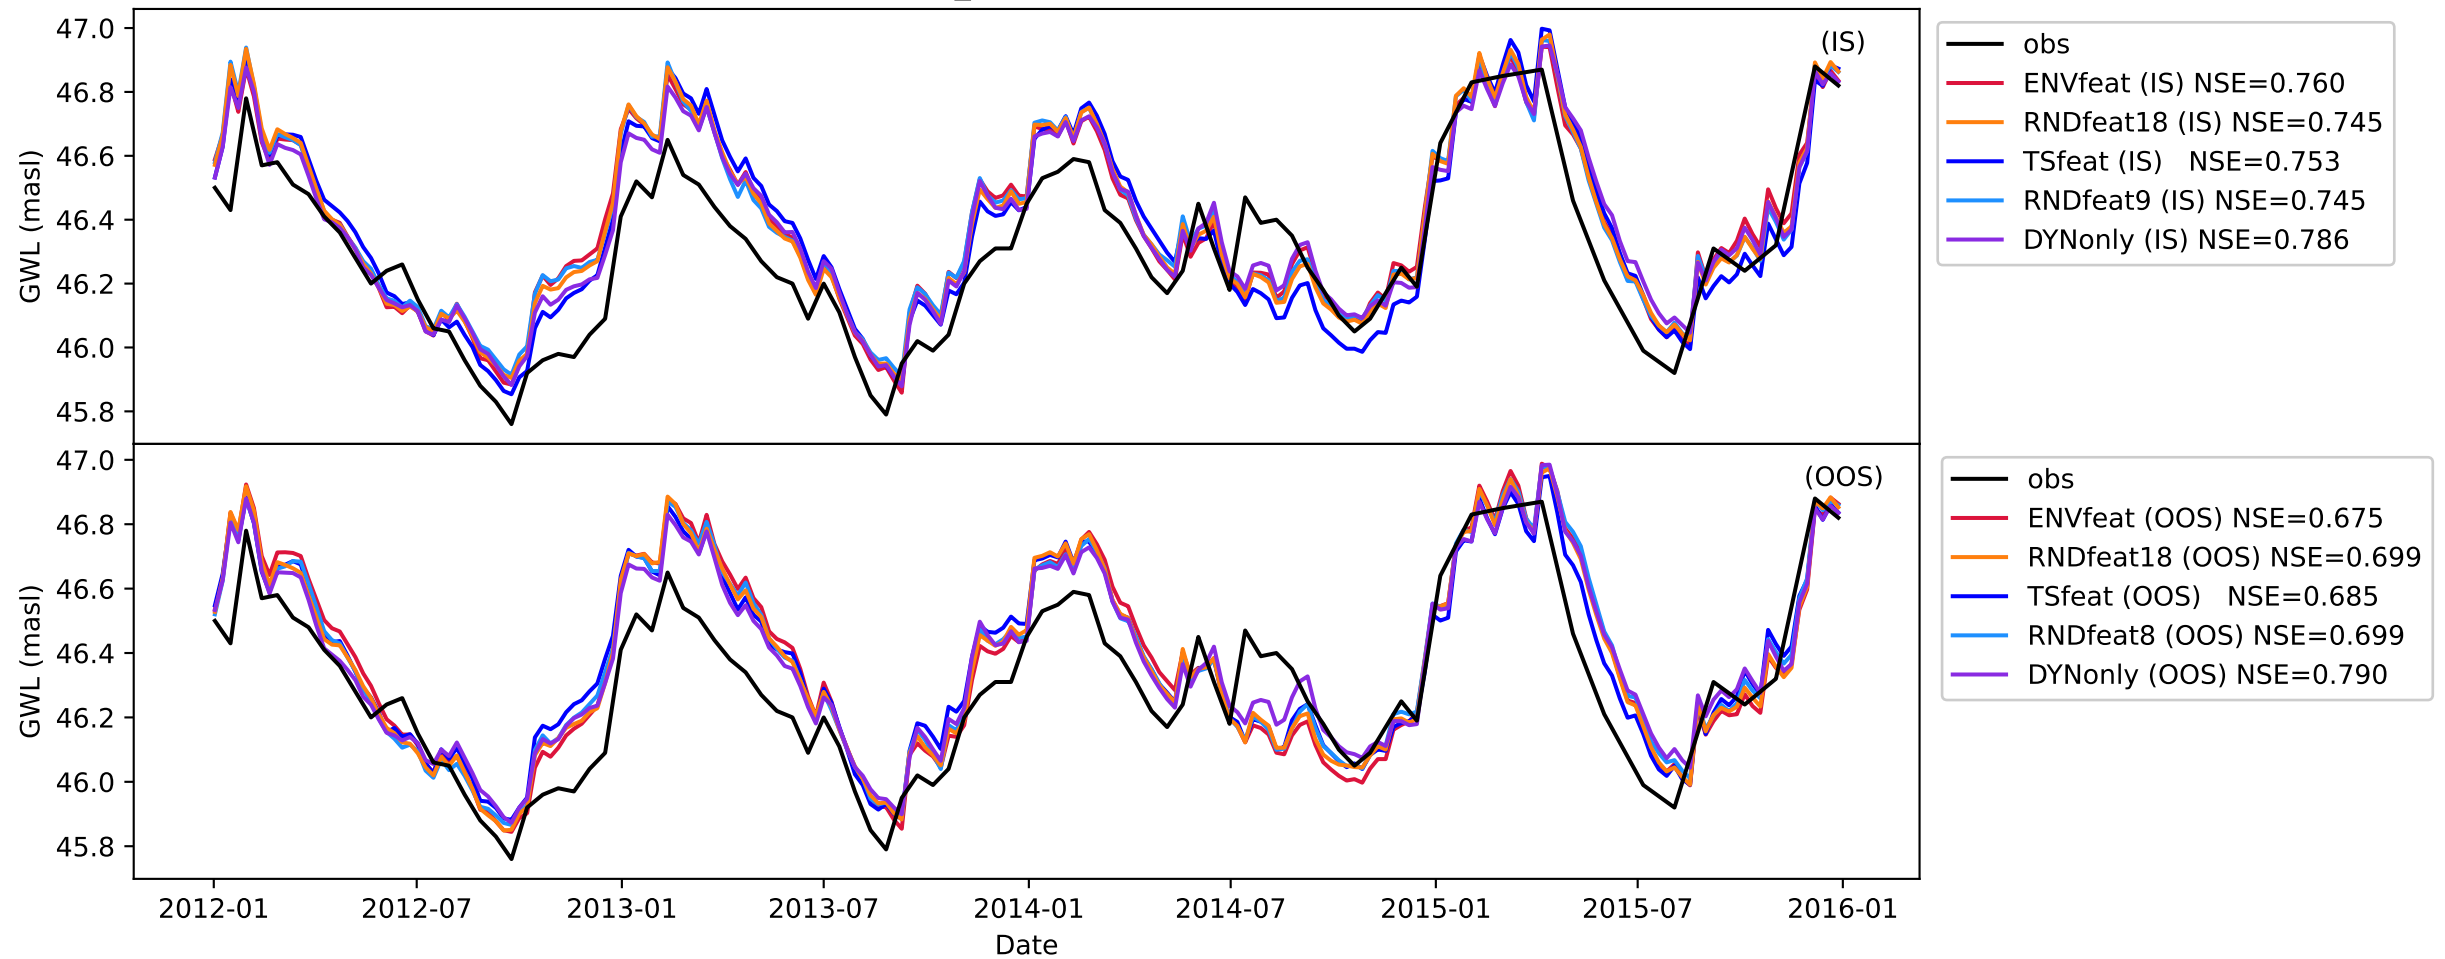

NW\_129660176

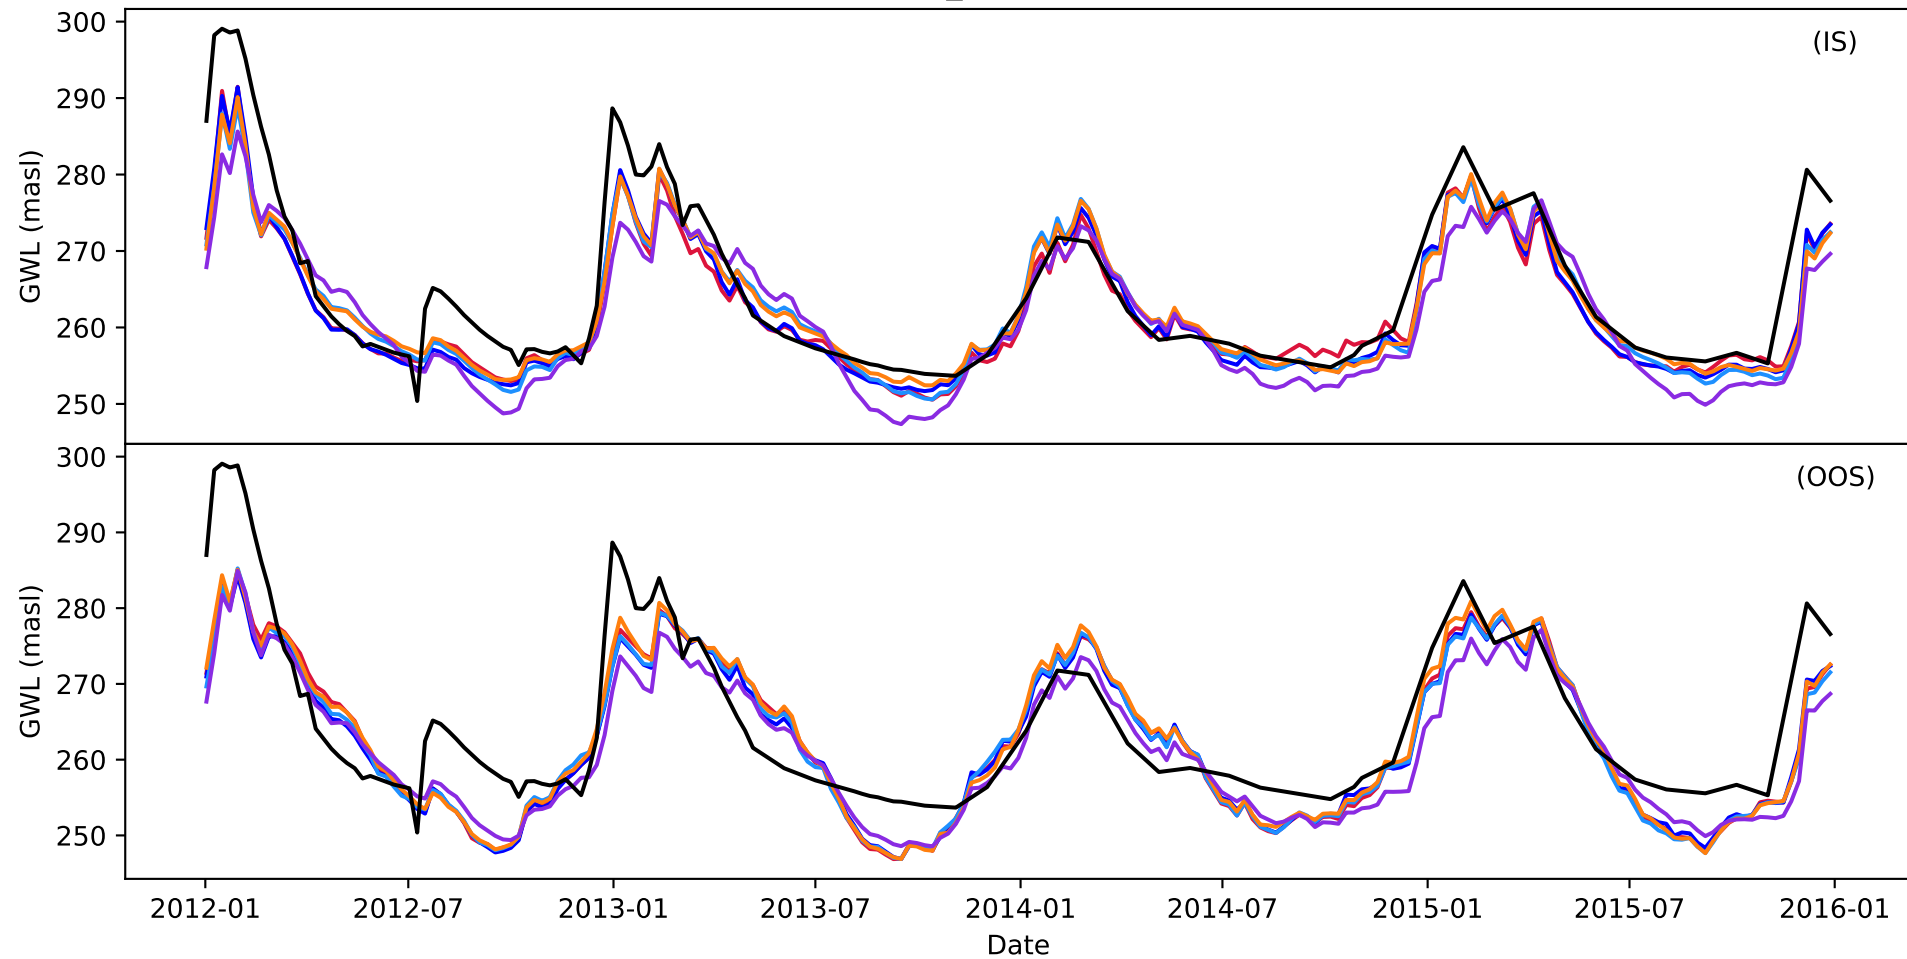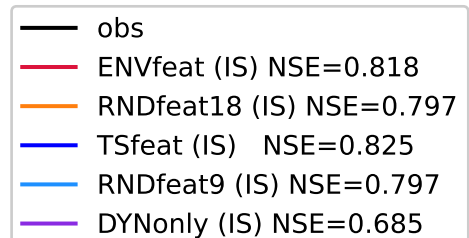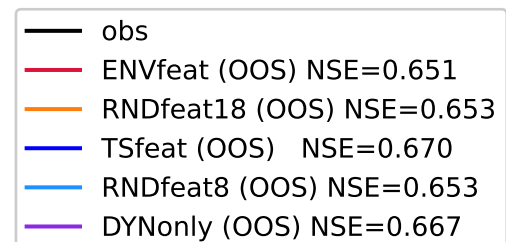

NW\_129660206

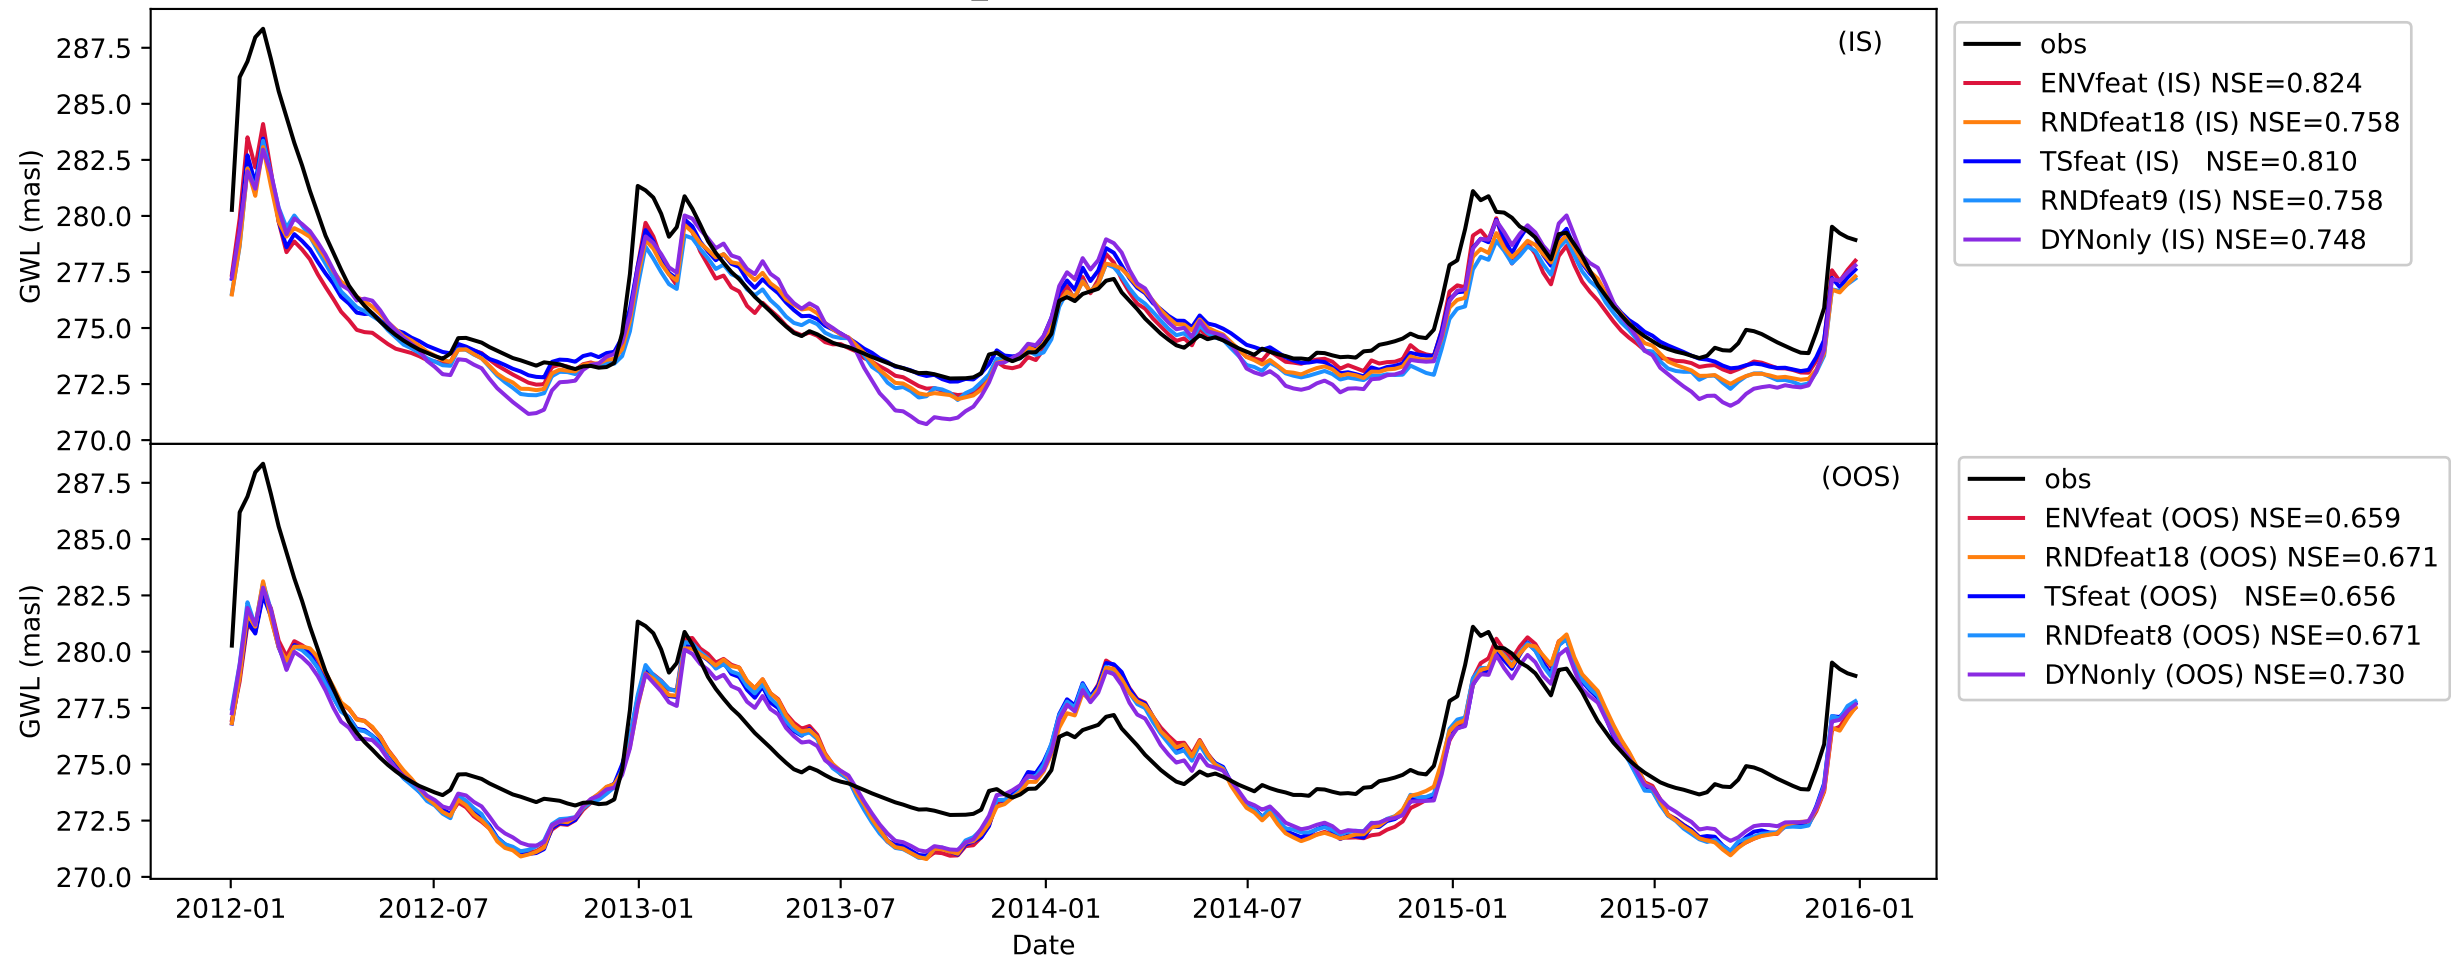

RP\_2373131200

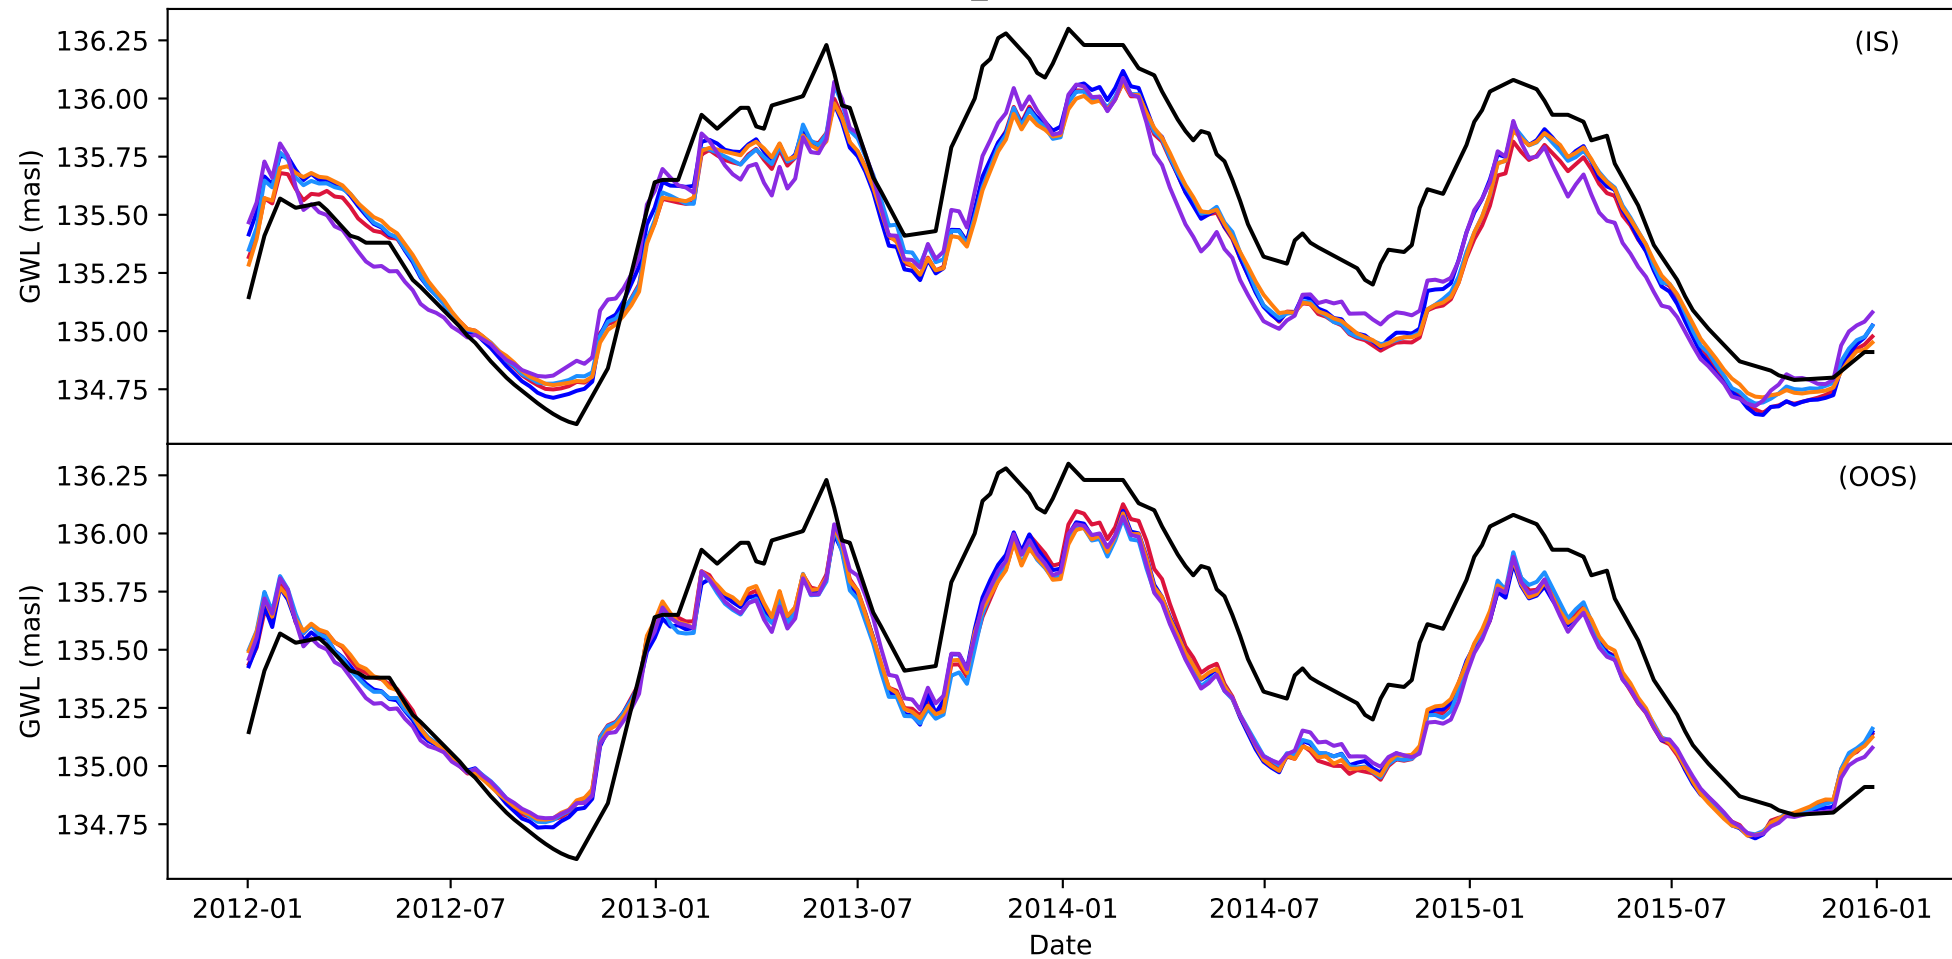

- obs
- ENVfeat (IS) NSE=0.751
- RNDfeat18 (IS) NSE=0.758
- TSfeat (IS) NSE=0.776
- RNDfeat9 (IS) NSE=0.758
- DYNOnly (IS) NSE=0.751

- obs
- ENVfeat (OOS) NSE=0.722
- RNDfeat18 (OOS) NSE=0.706
- TSfeat (OOS) NSE=0.708
- RNDfeat8 (OOS) NSE=0.706
- DYNOnly (OOS) NSE=0.731



RP\_2378140100

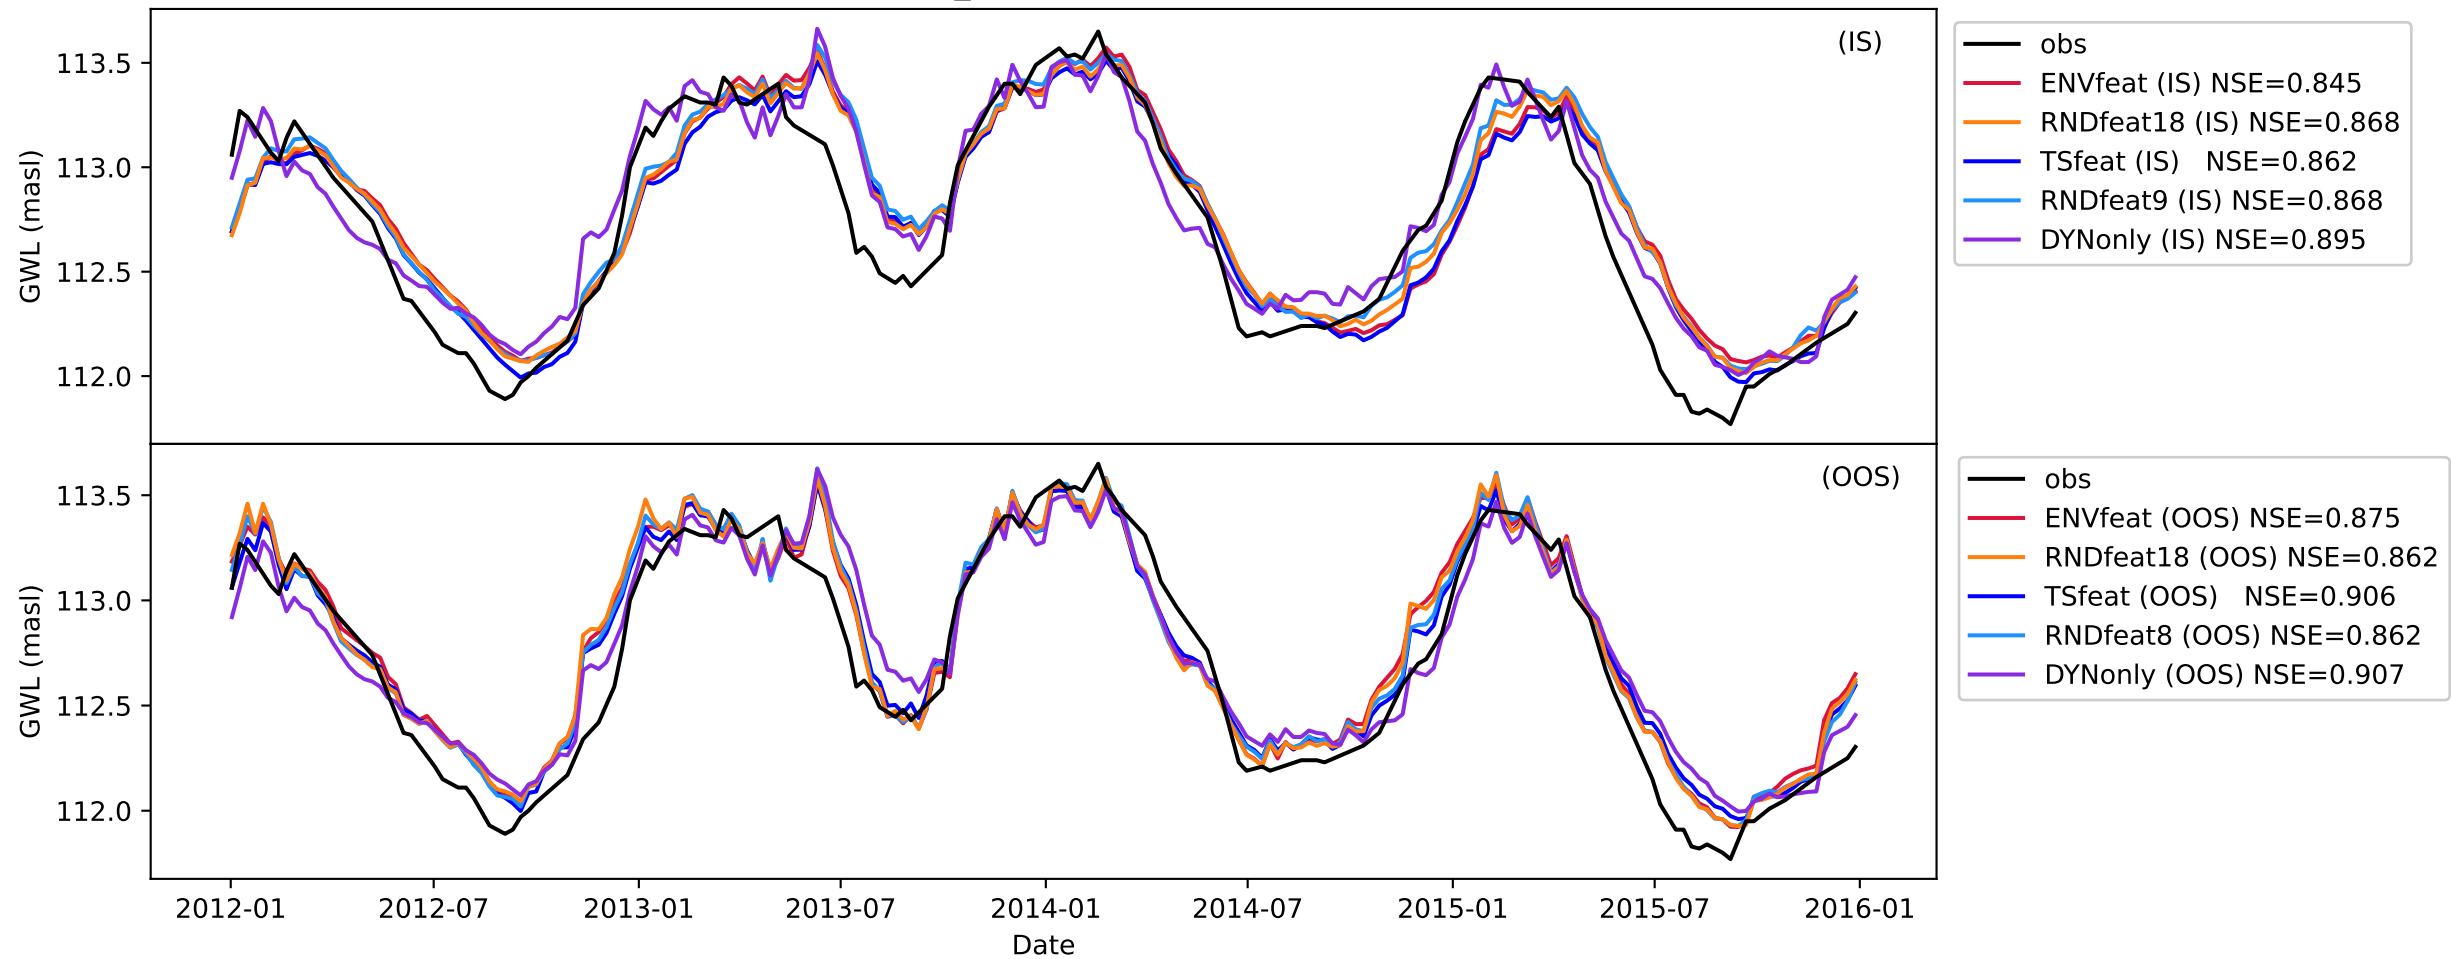

SH\_10L53126001

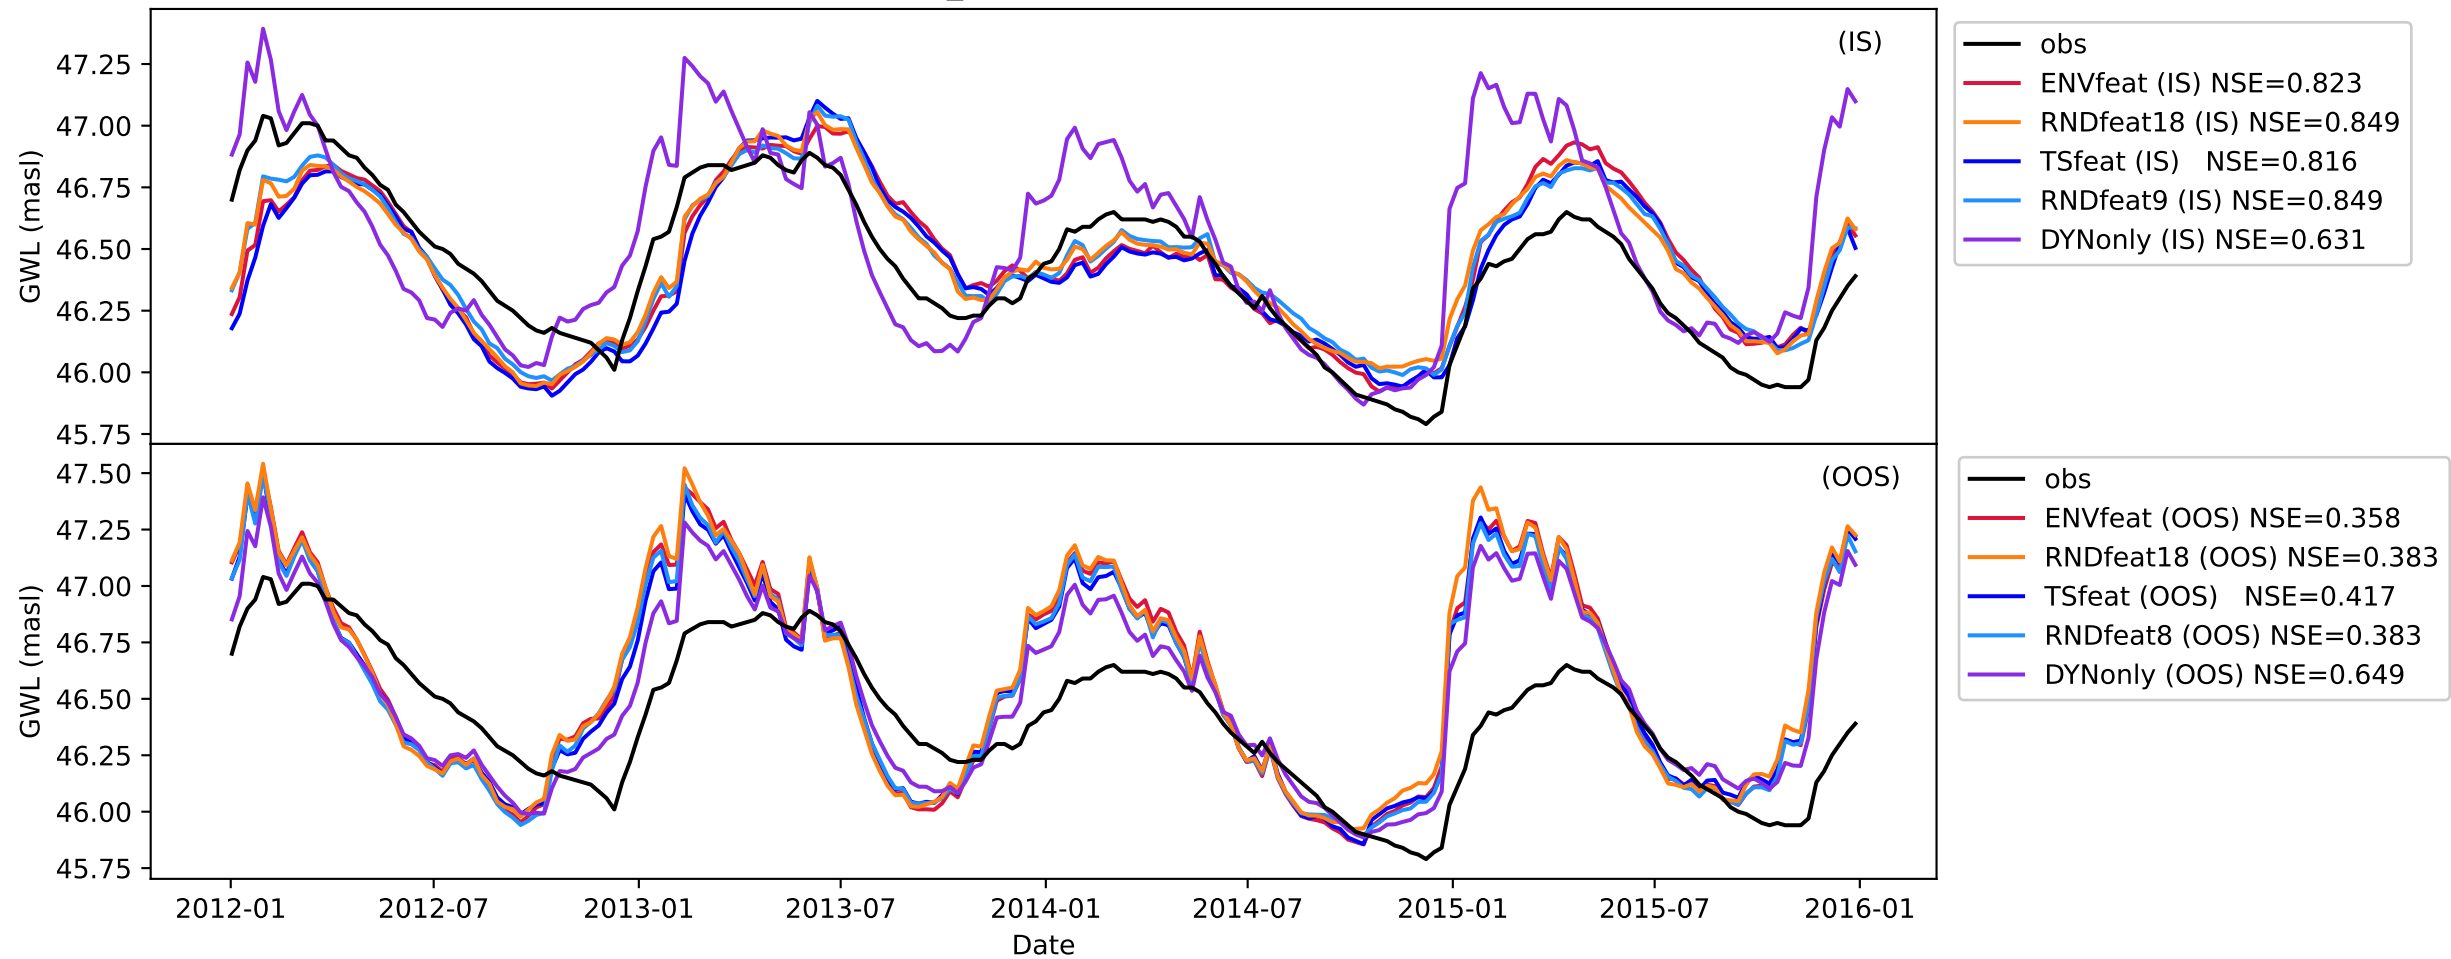

SH\_10L55038005

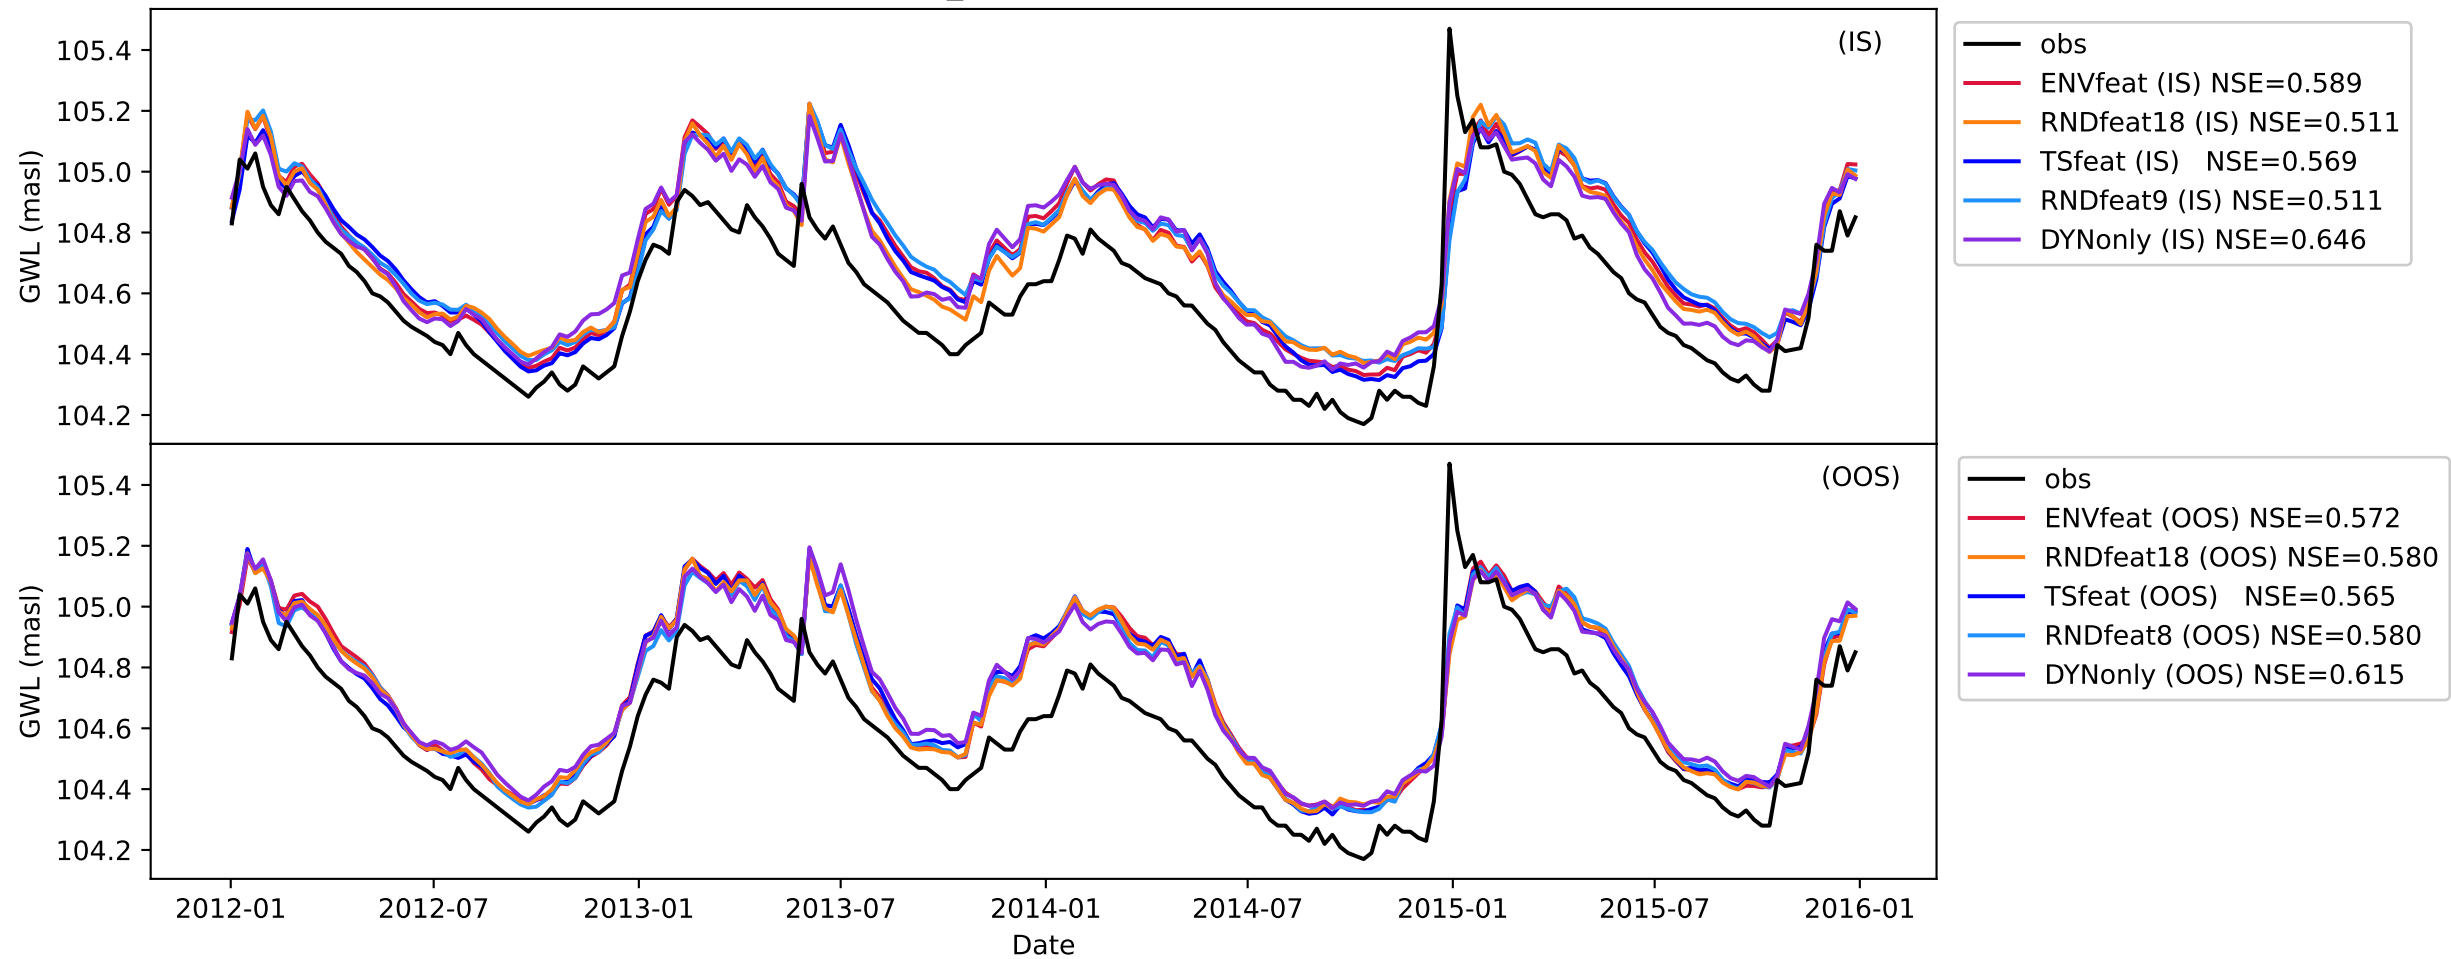

# SH\_10L56048003

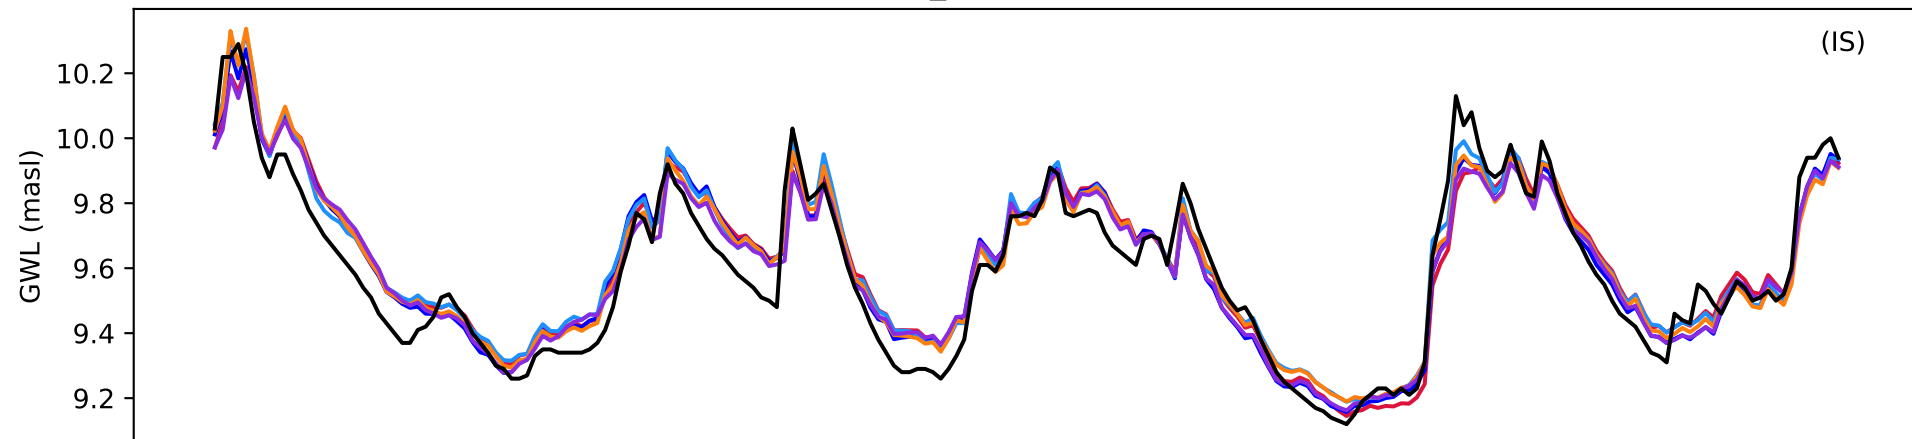

- obs
- ENVfeat (IS) NSE=0.899
- RNDfeat18 (IS) NSE=0.909
- TSfeat (IS) NSE=0.915
- RNDfeat9 (IS) NSE=0.909
- DYNOnly (IS) NSE=0.914

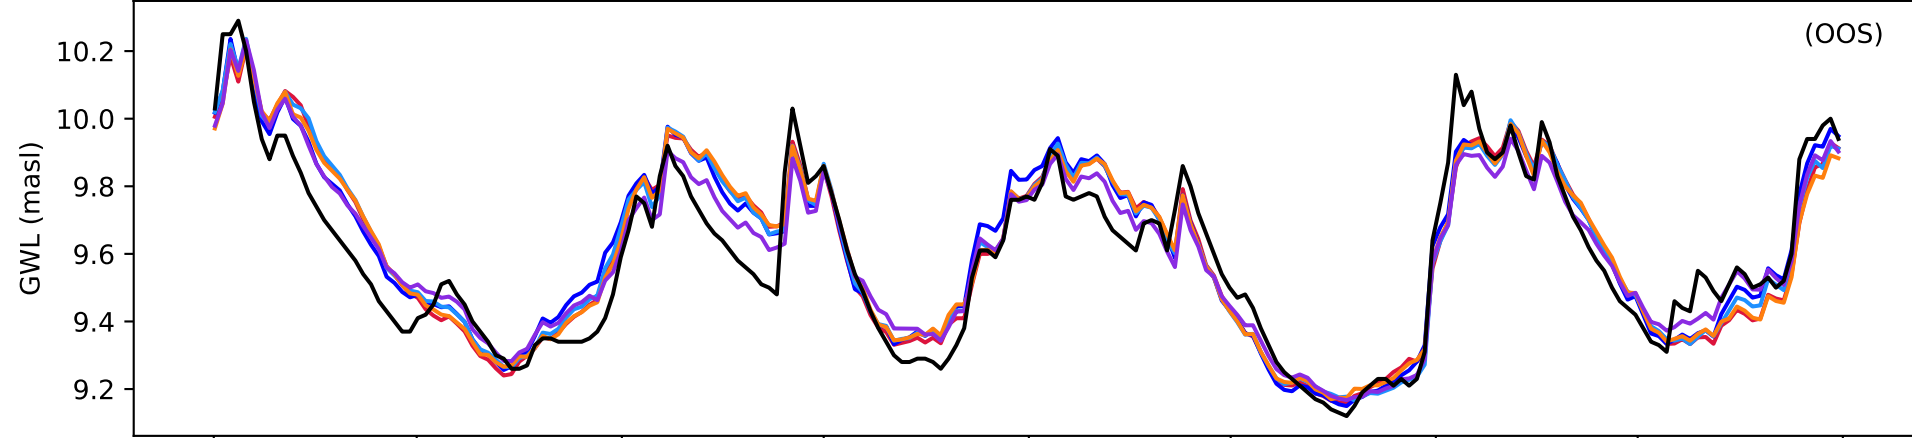

- obs
- ENVfeat (OOS) NSE=0.821
- RNDfeat18 (OOS) NSE=0.811
- TSfeat (OOS) NSE=0.858
- RNDfeat8 (OOS) NSE=0.811
- DYNOnly (OOS) NSE=0.903

2012-01      2012-07      2013-01      2013-07      2014-01      2014-07      2015-01      2015-07      2016-01

Date

SH\_10L57066002

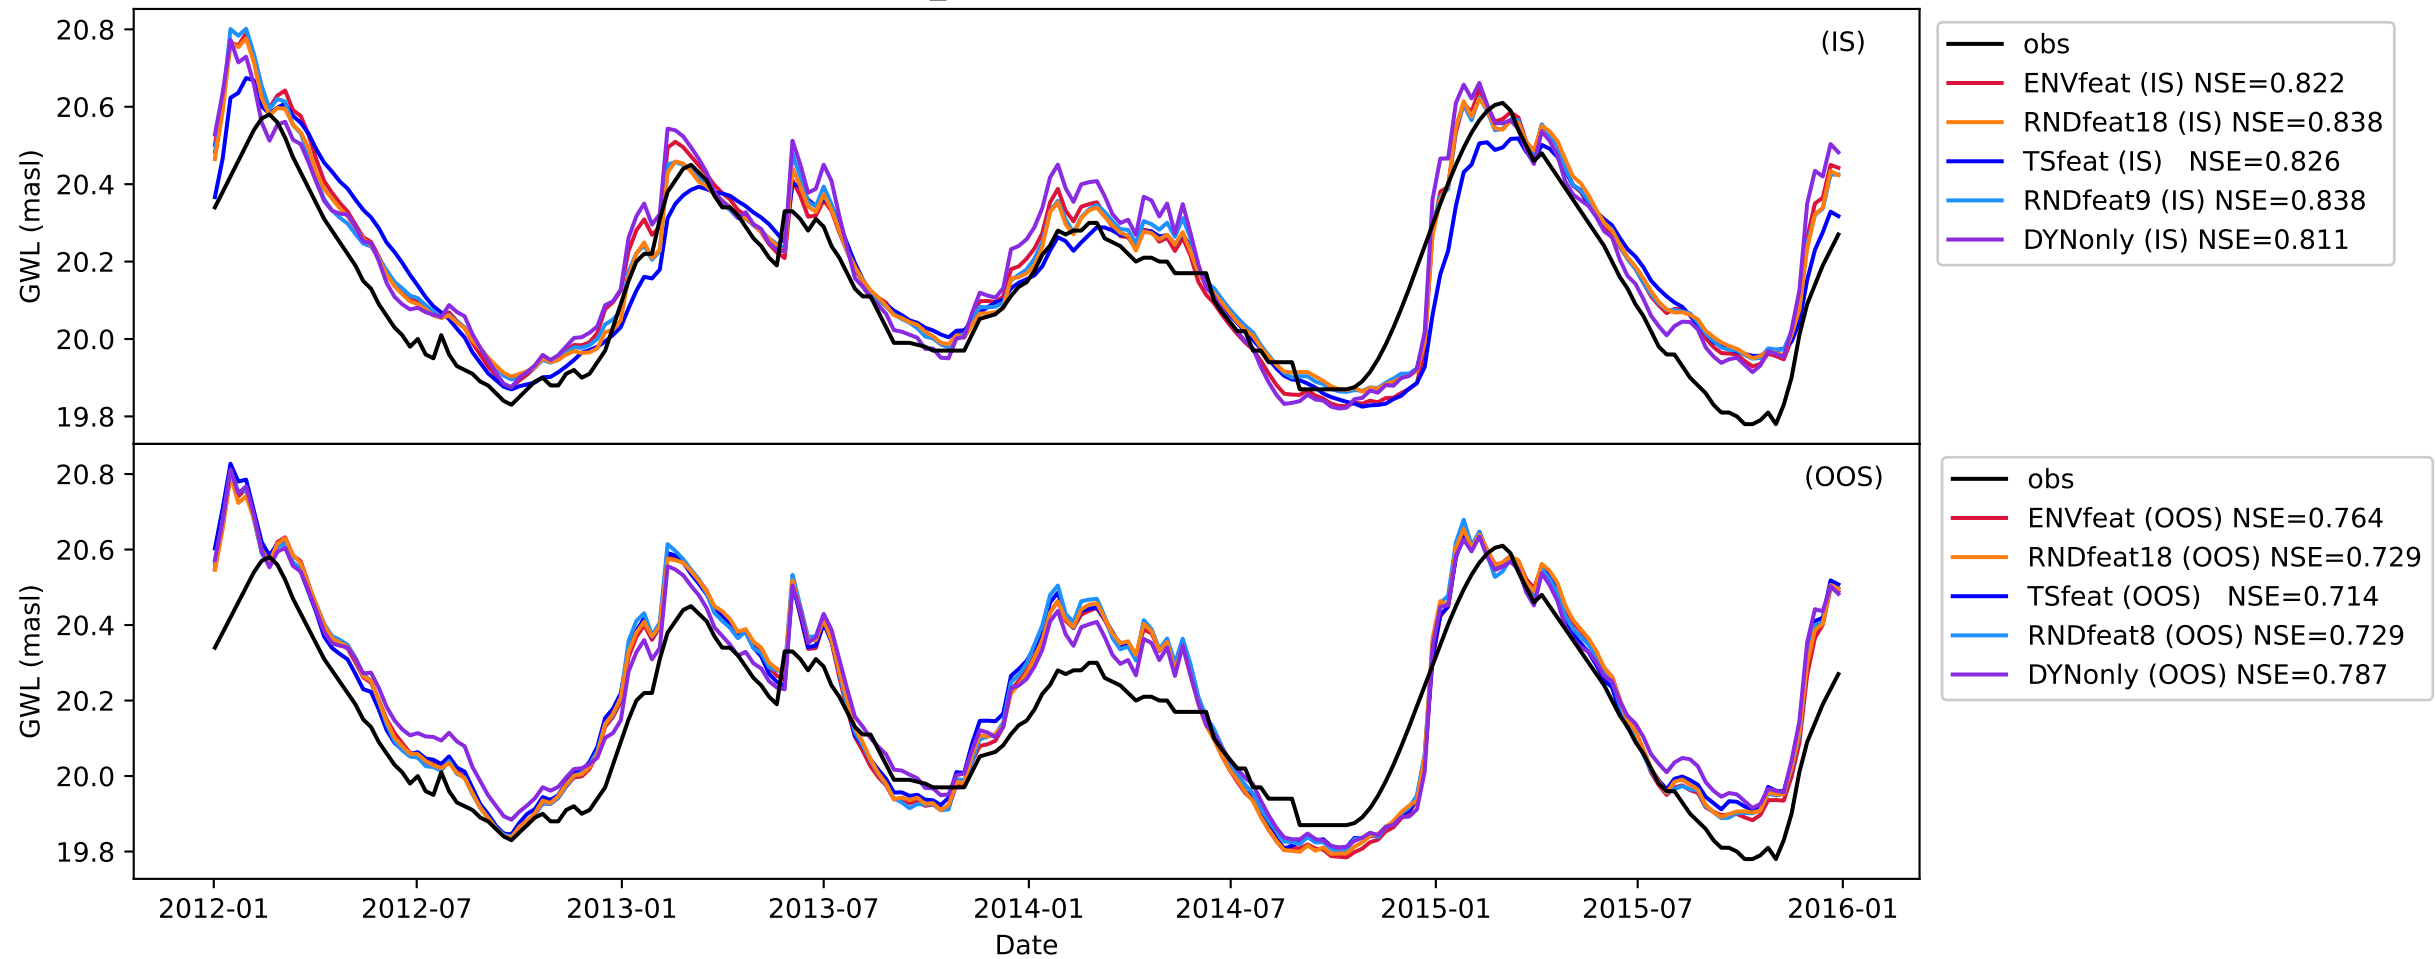

SH\_10L62060004

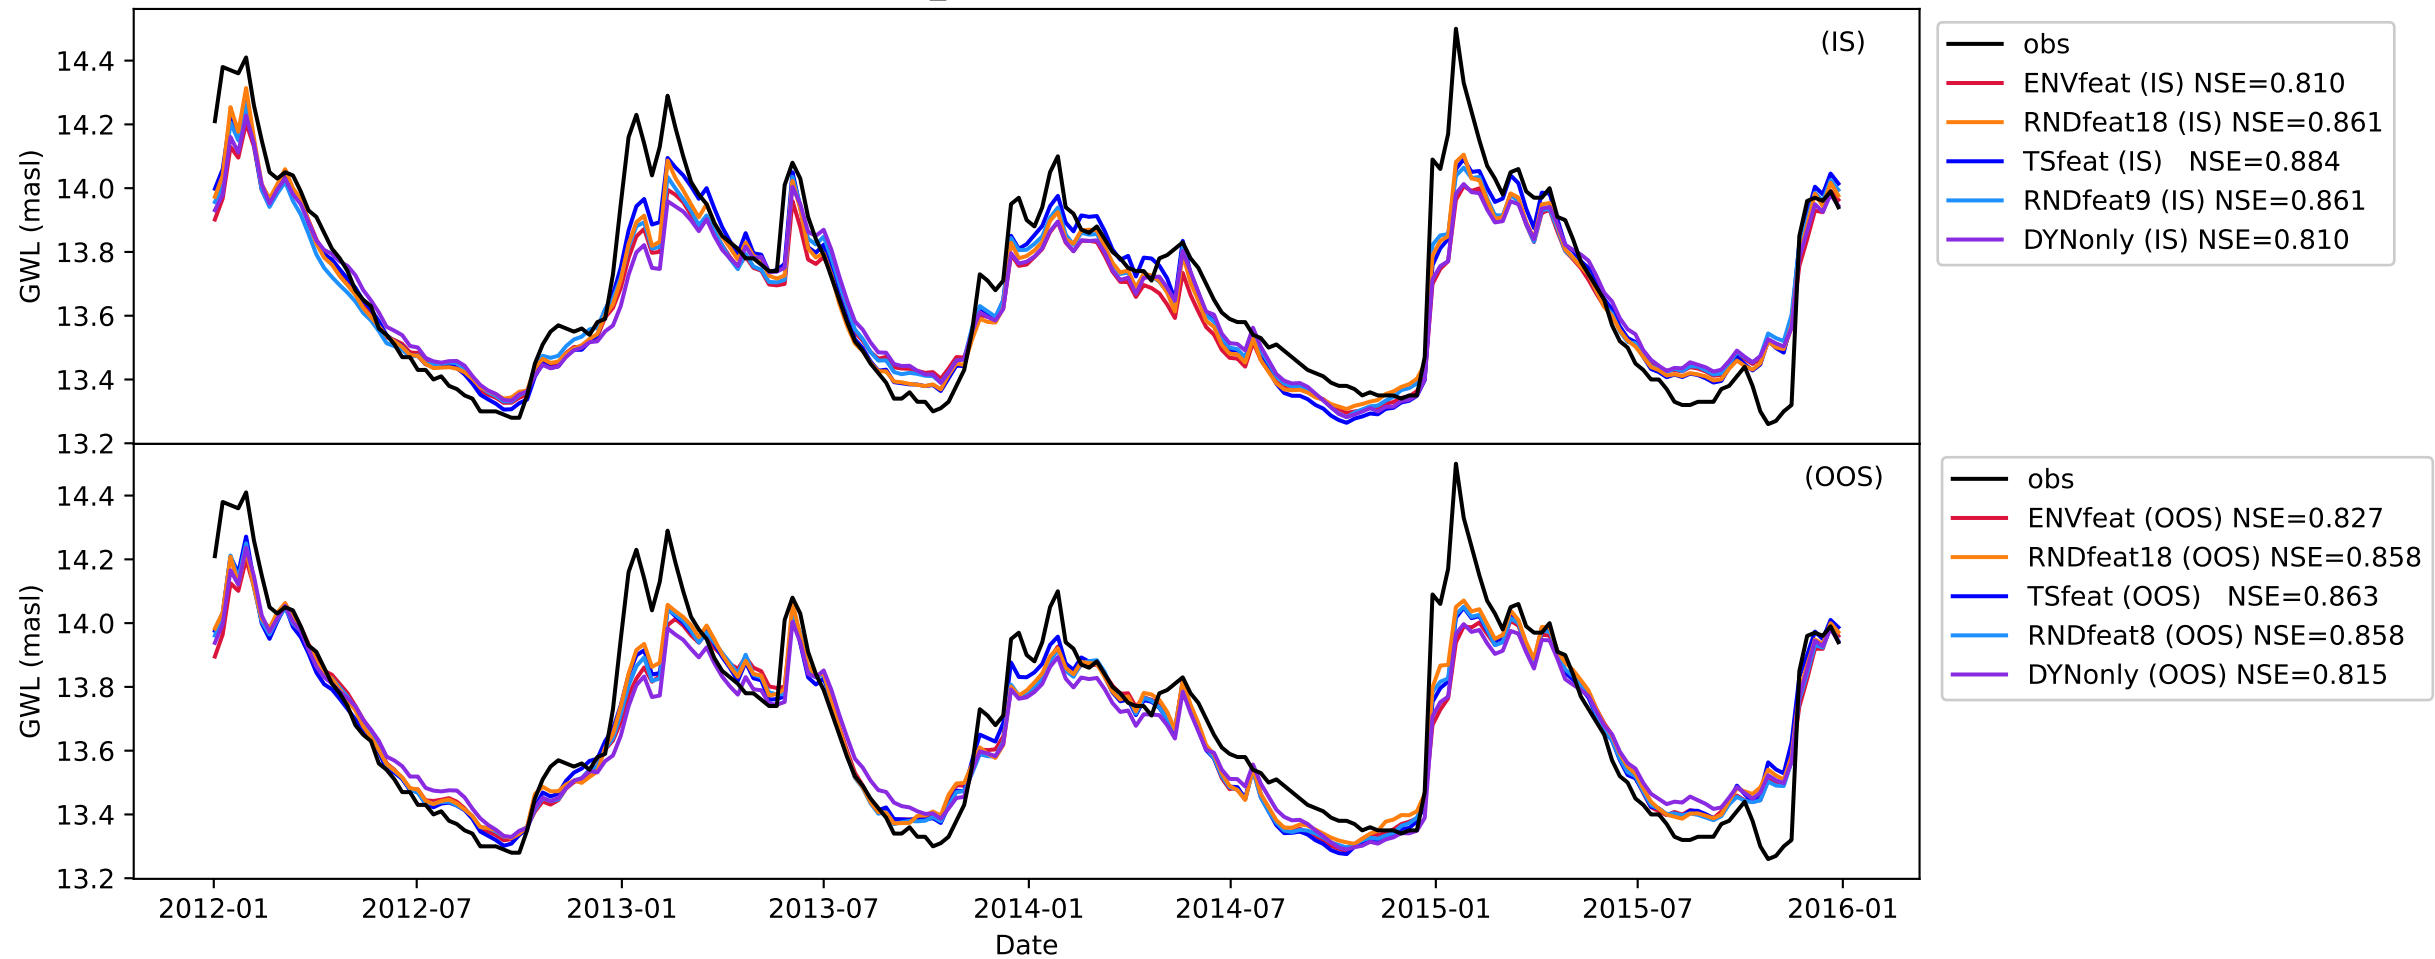

SN\_46440927

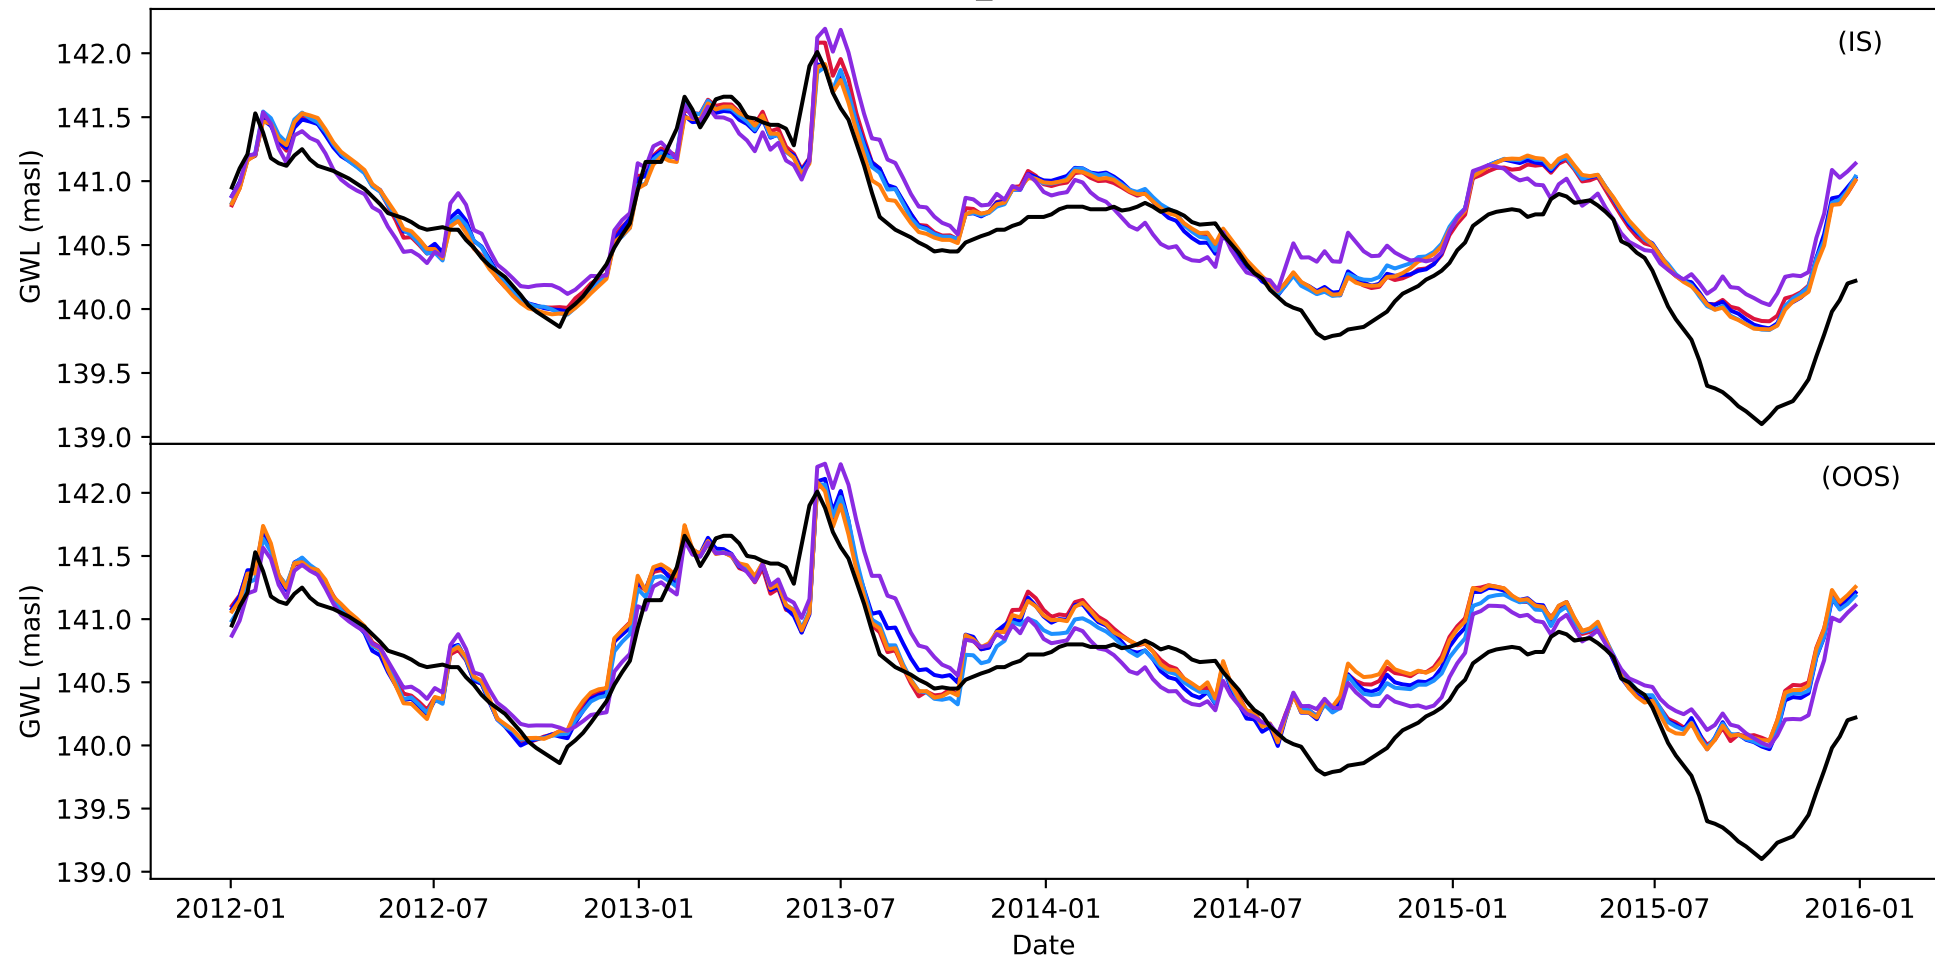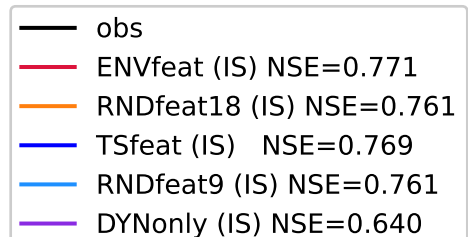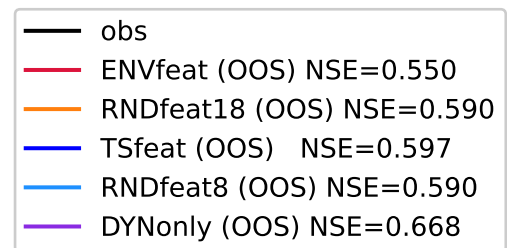

SN\_46460564

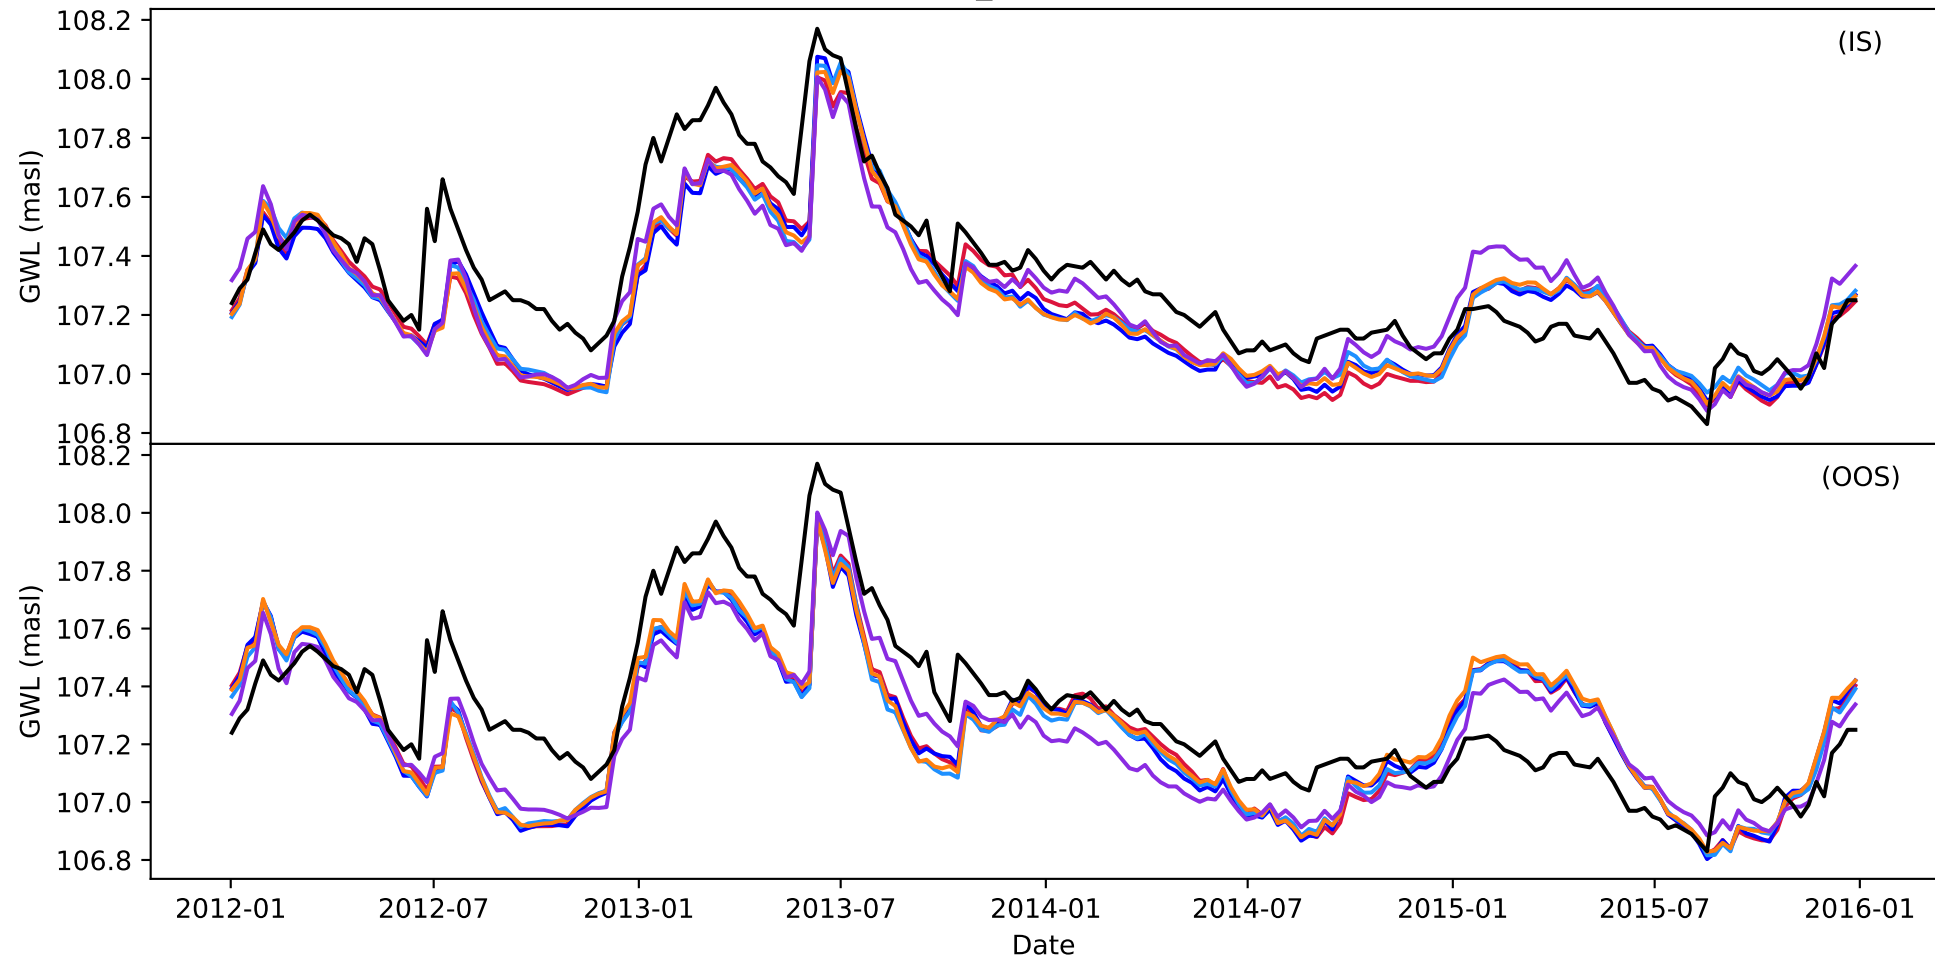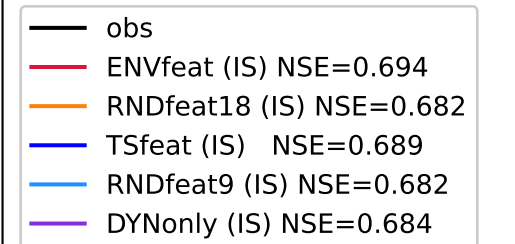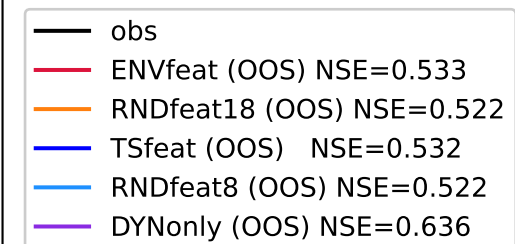



SN\_47500596

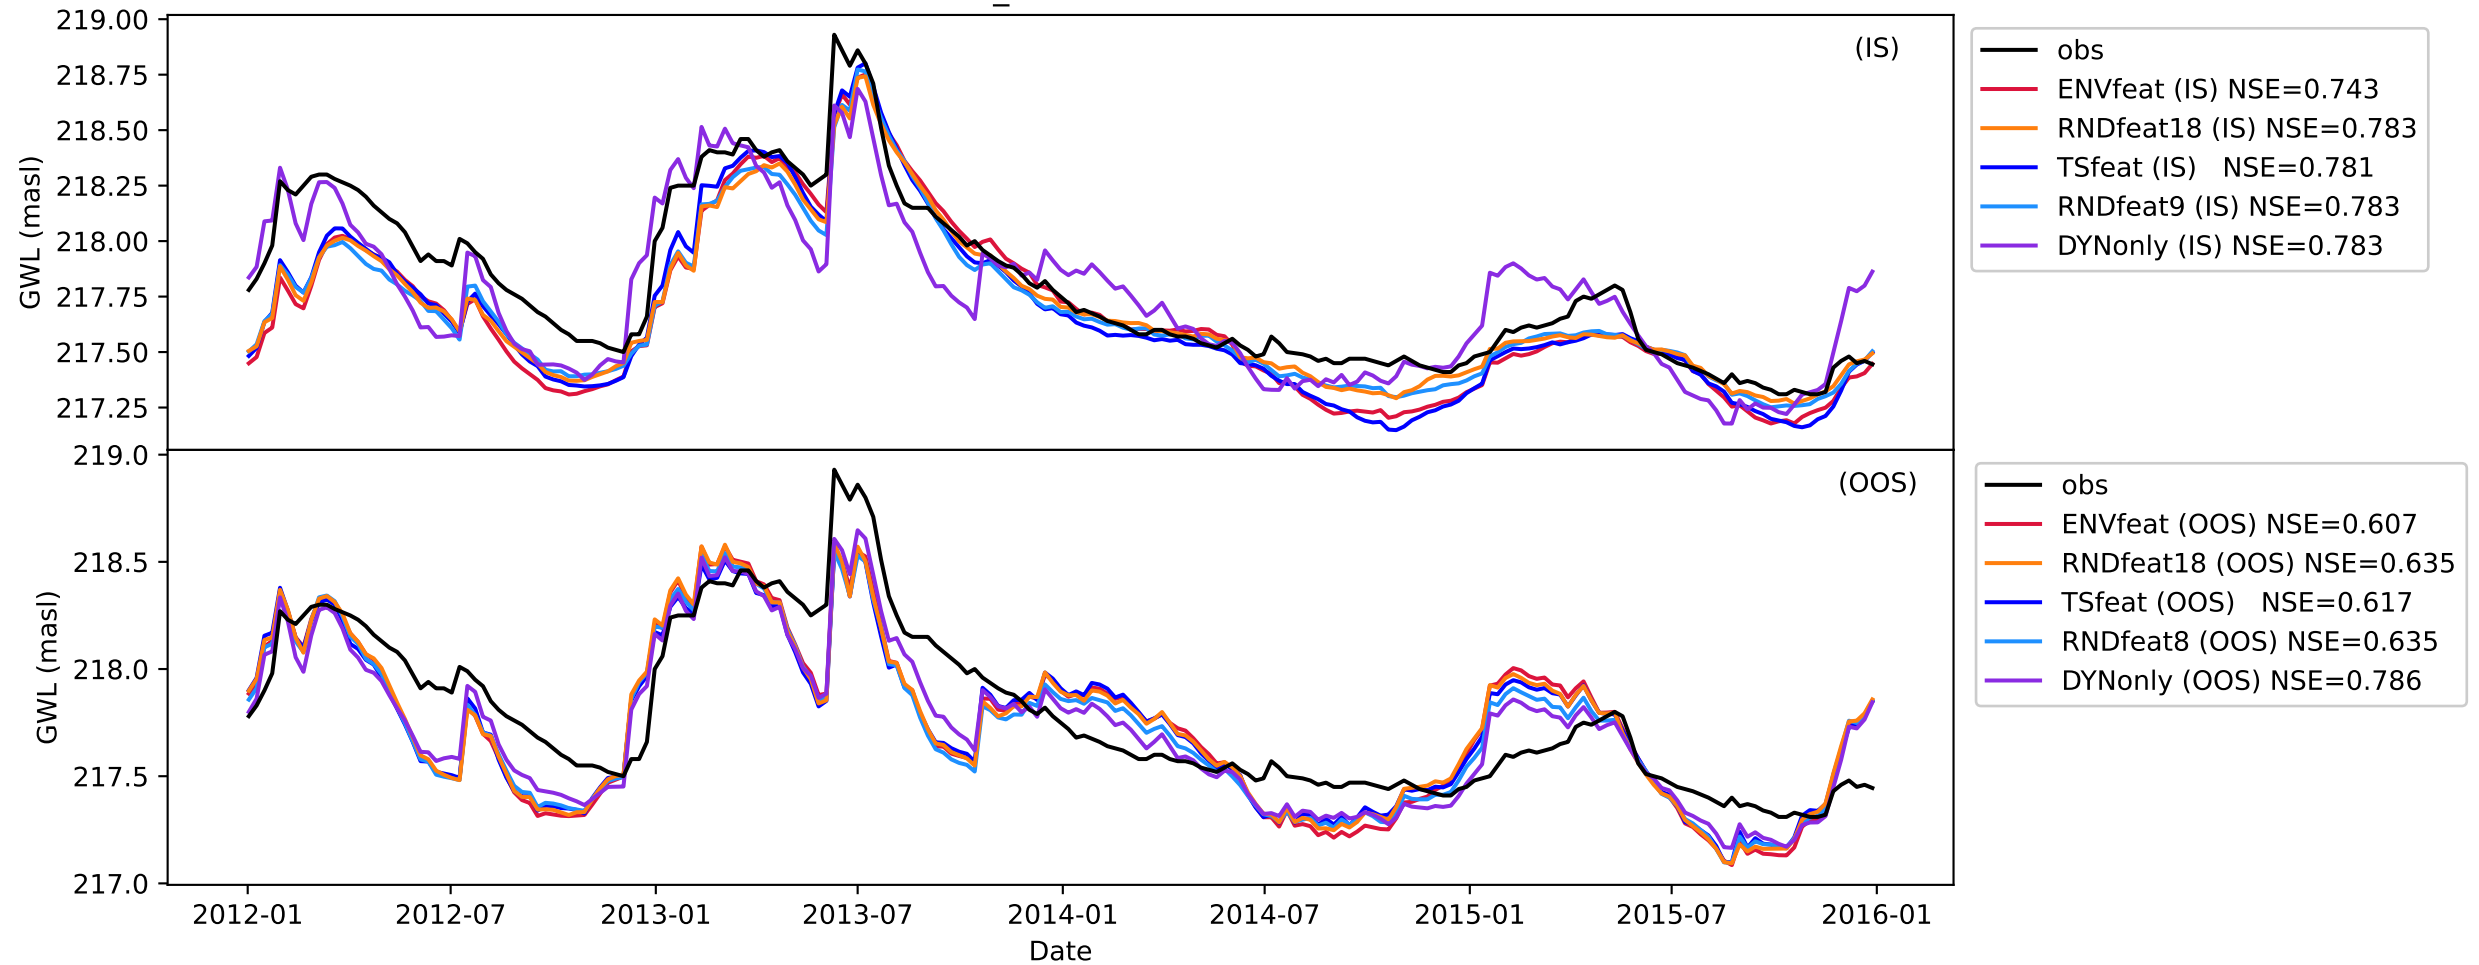

SN\_48390509

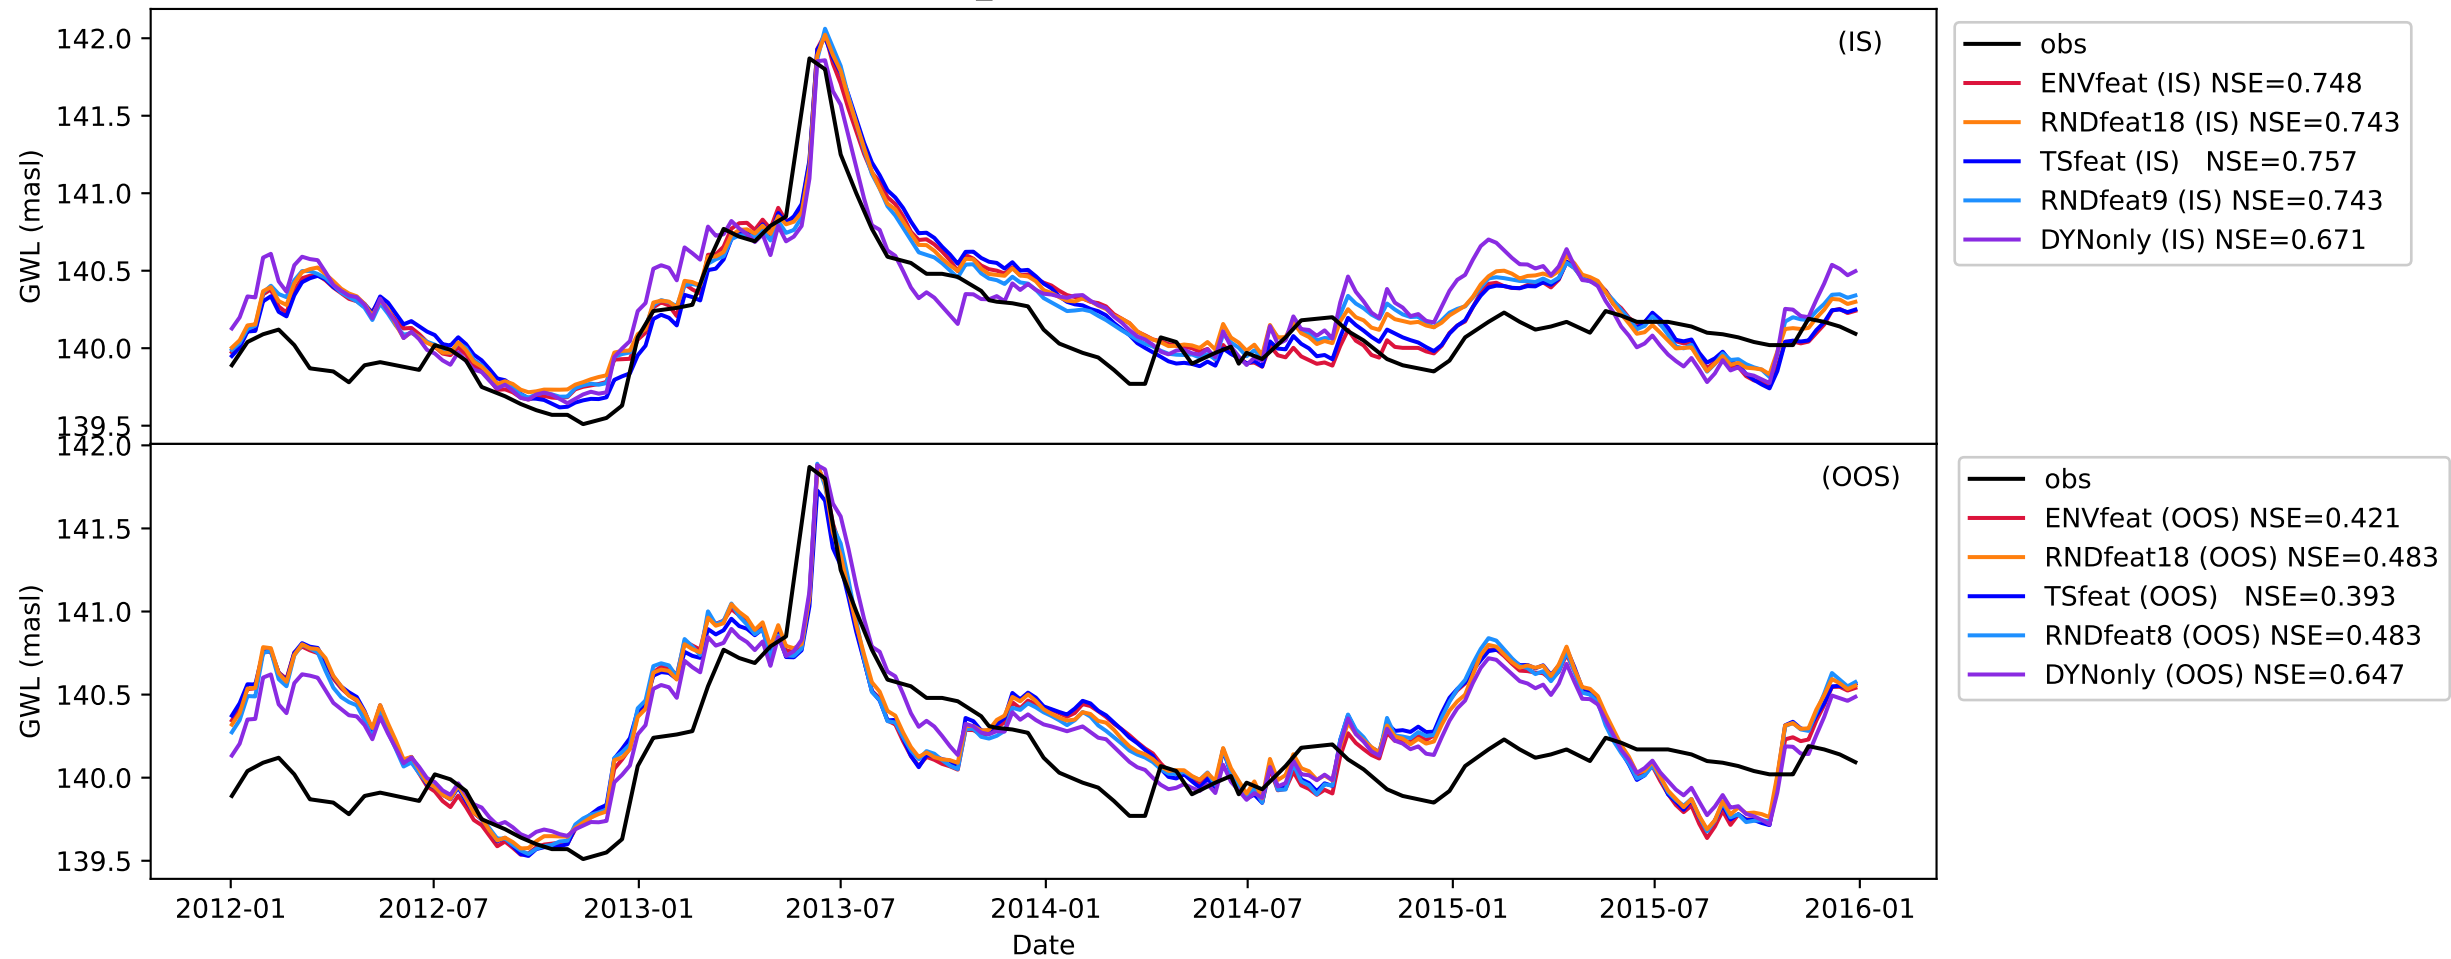

SN\_49430964

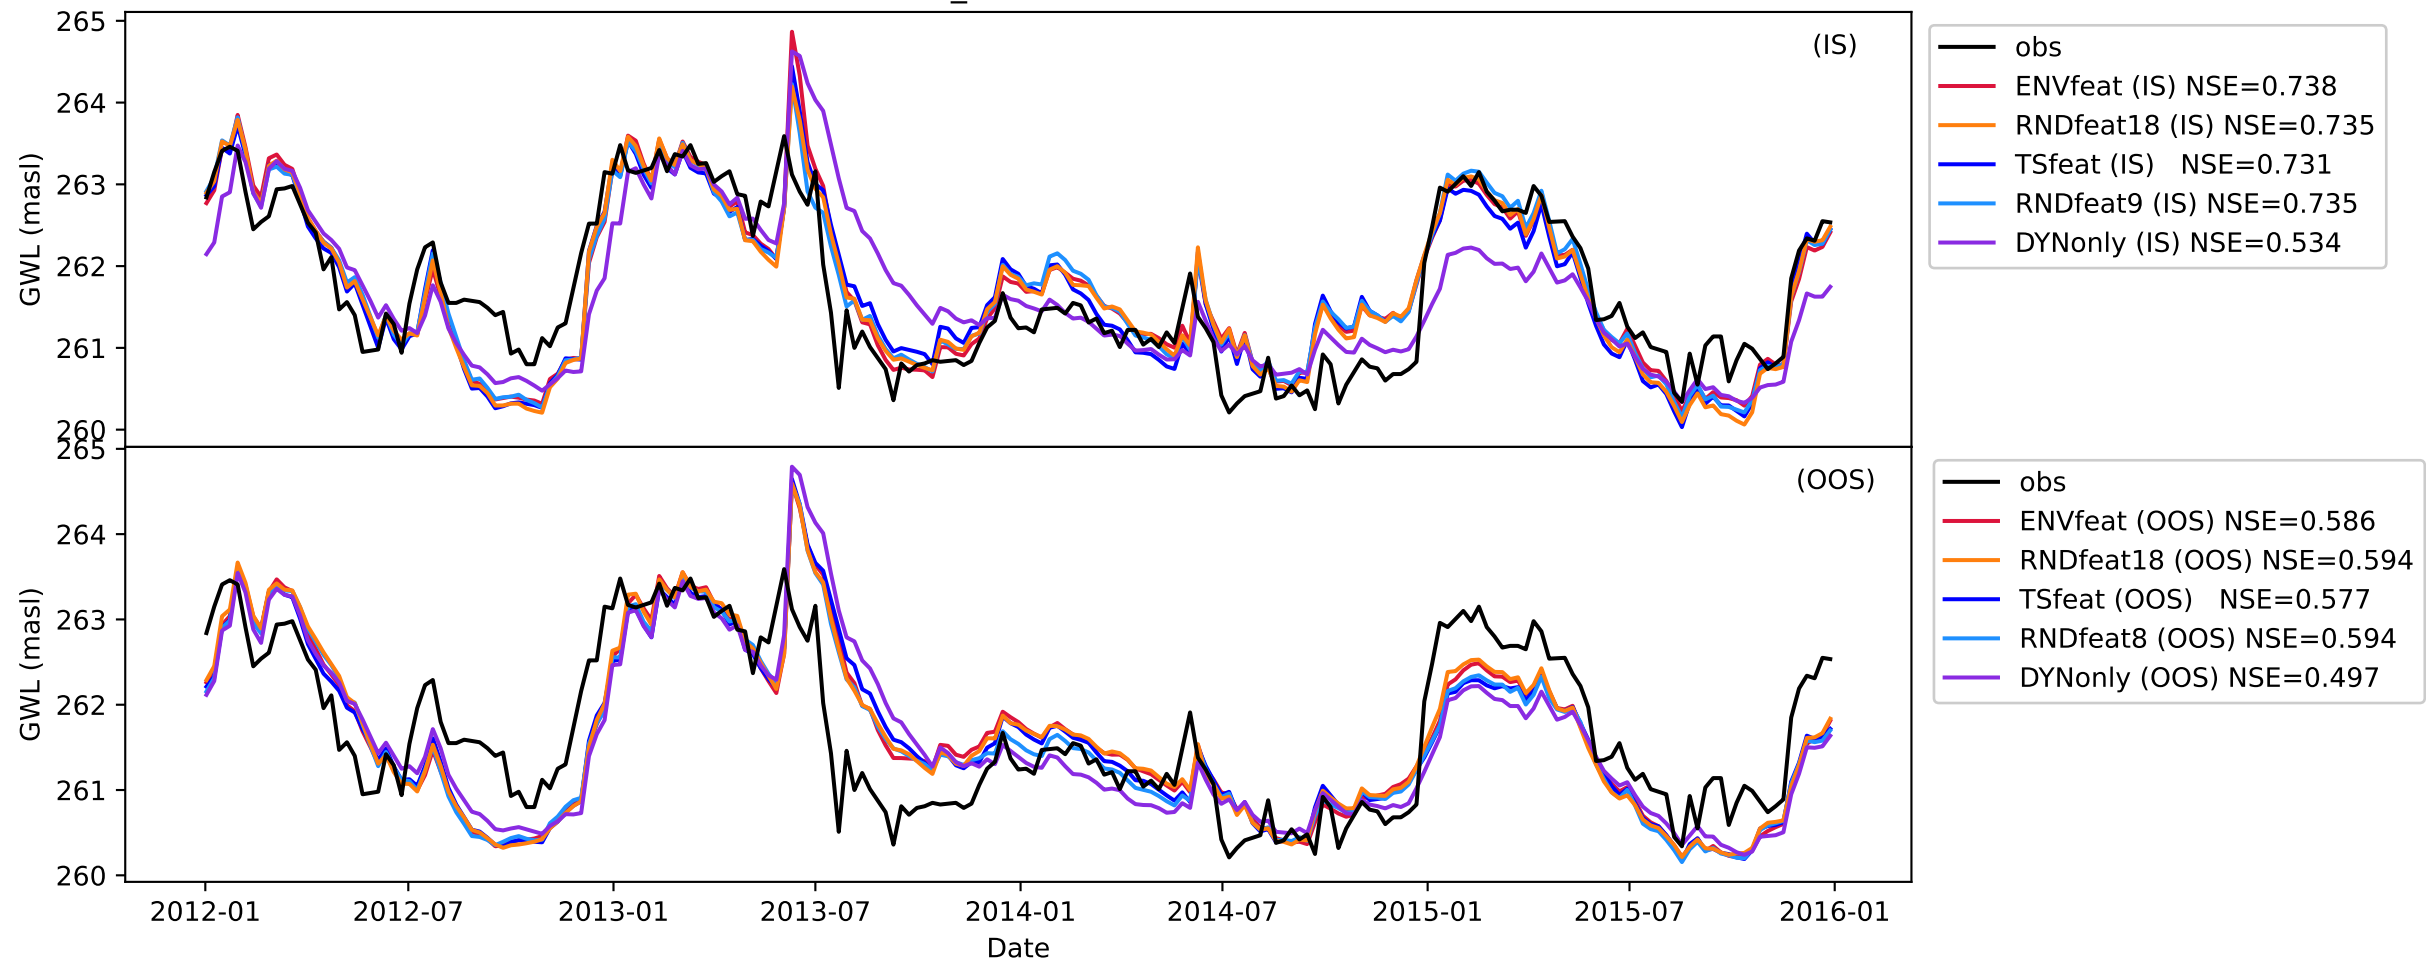

SN\_49484004

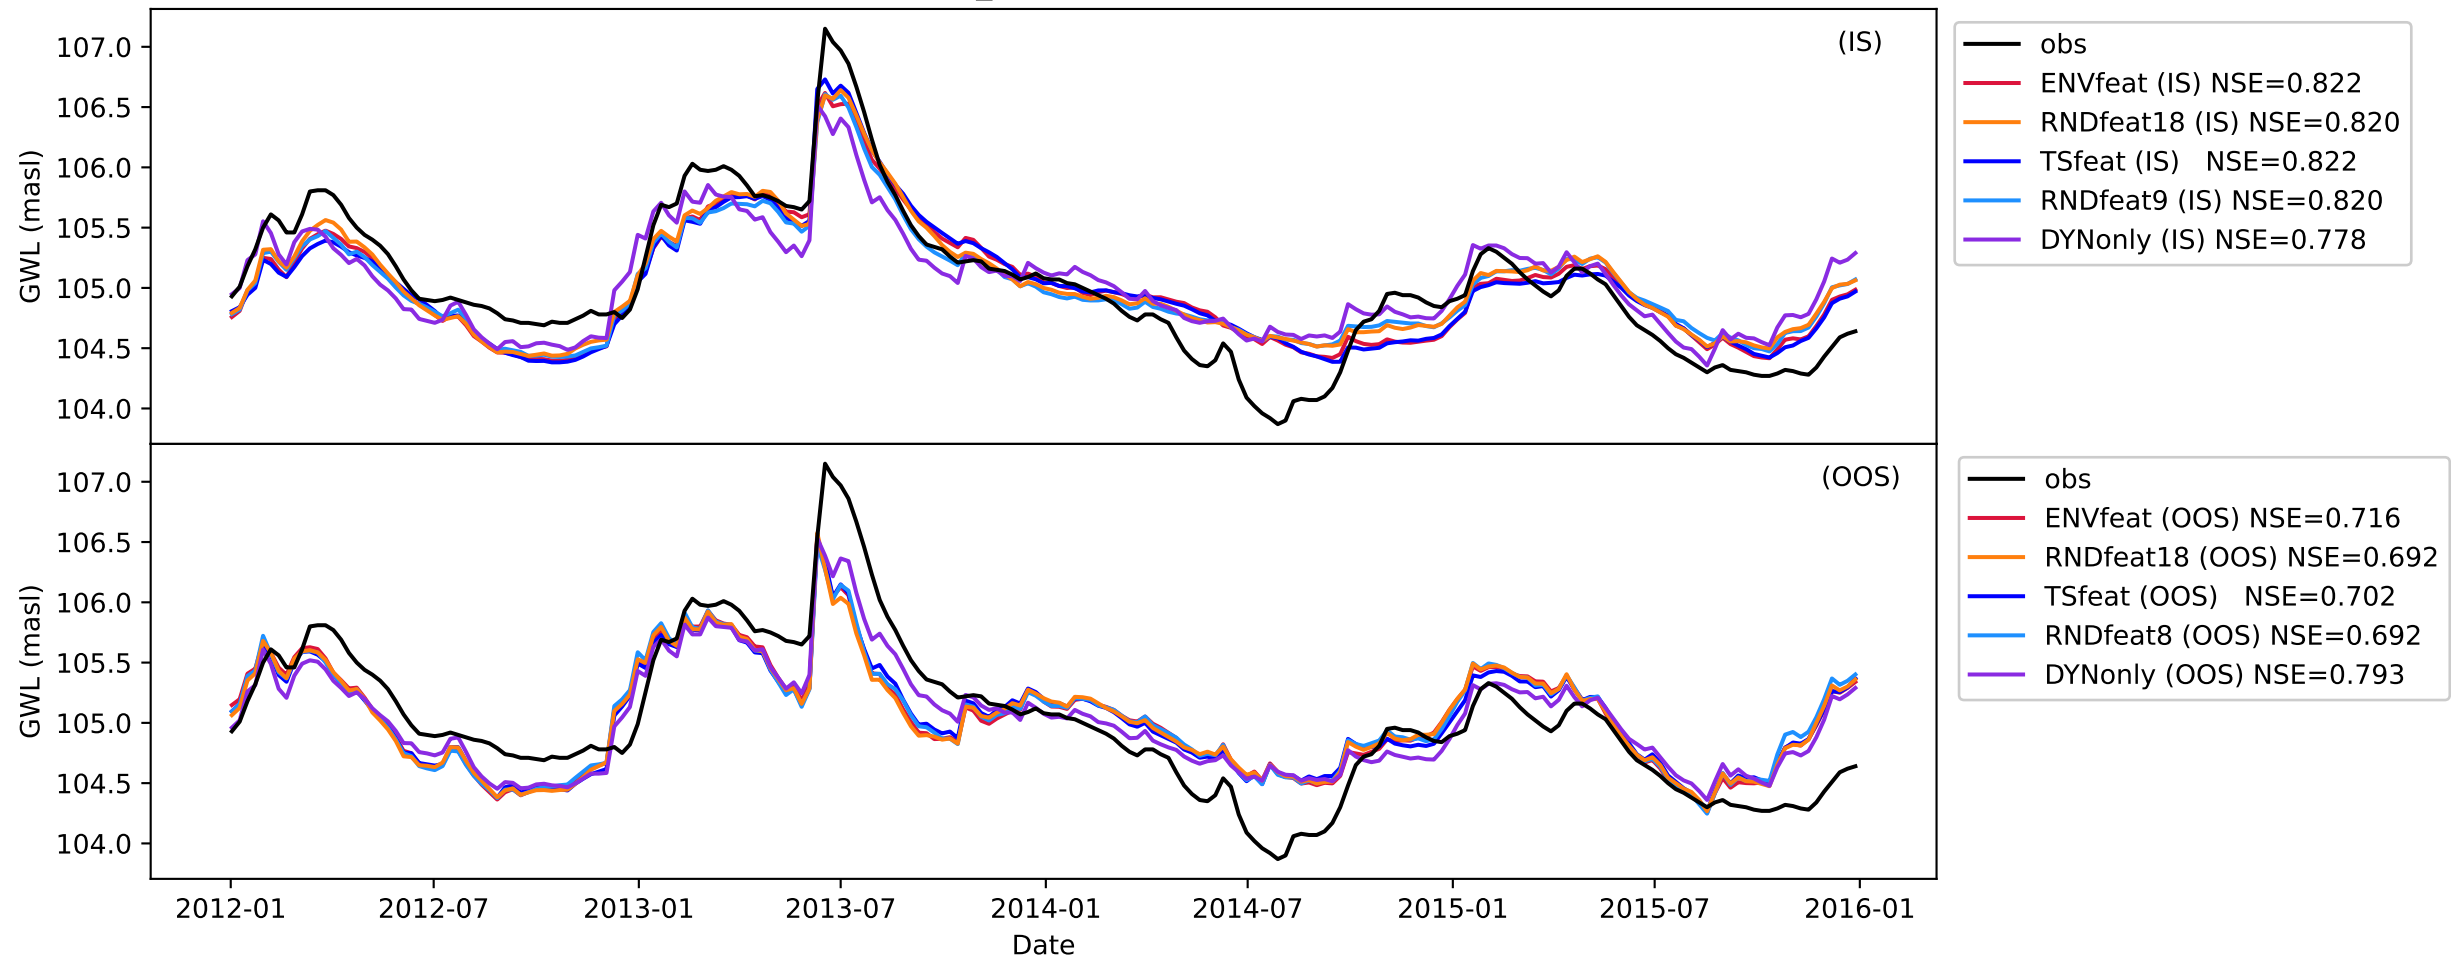

SN\_49531740

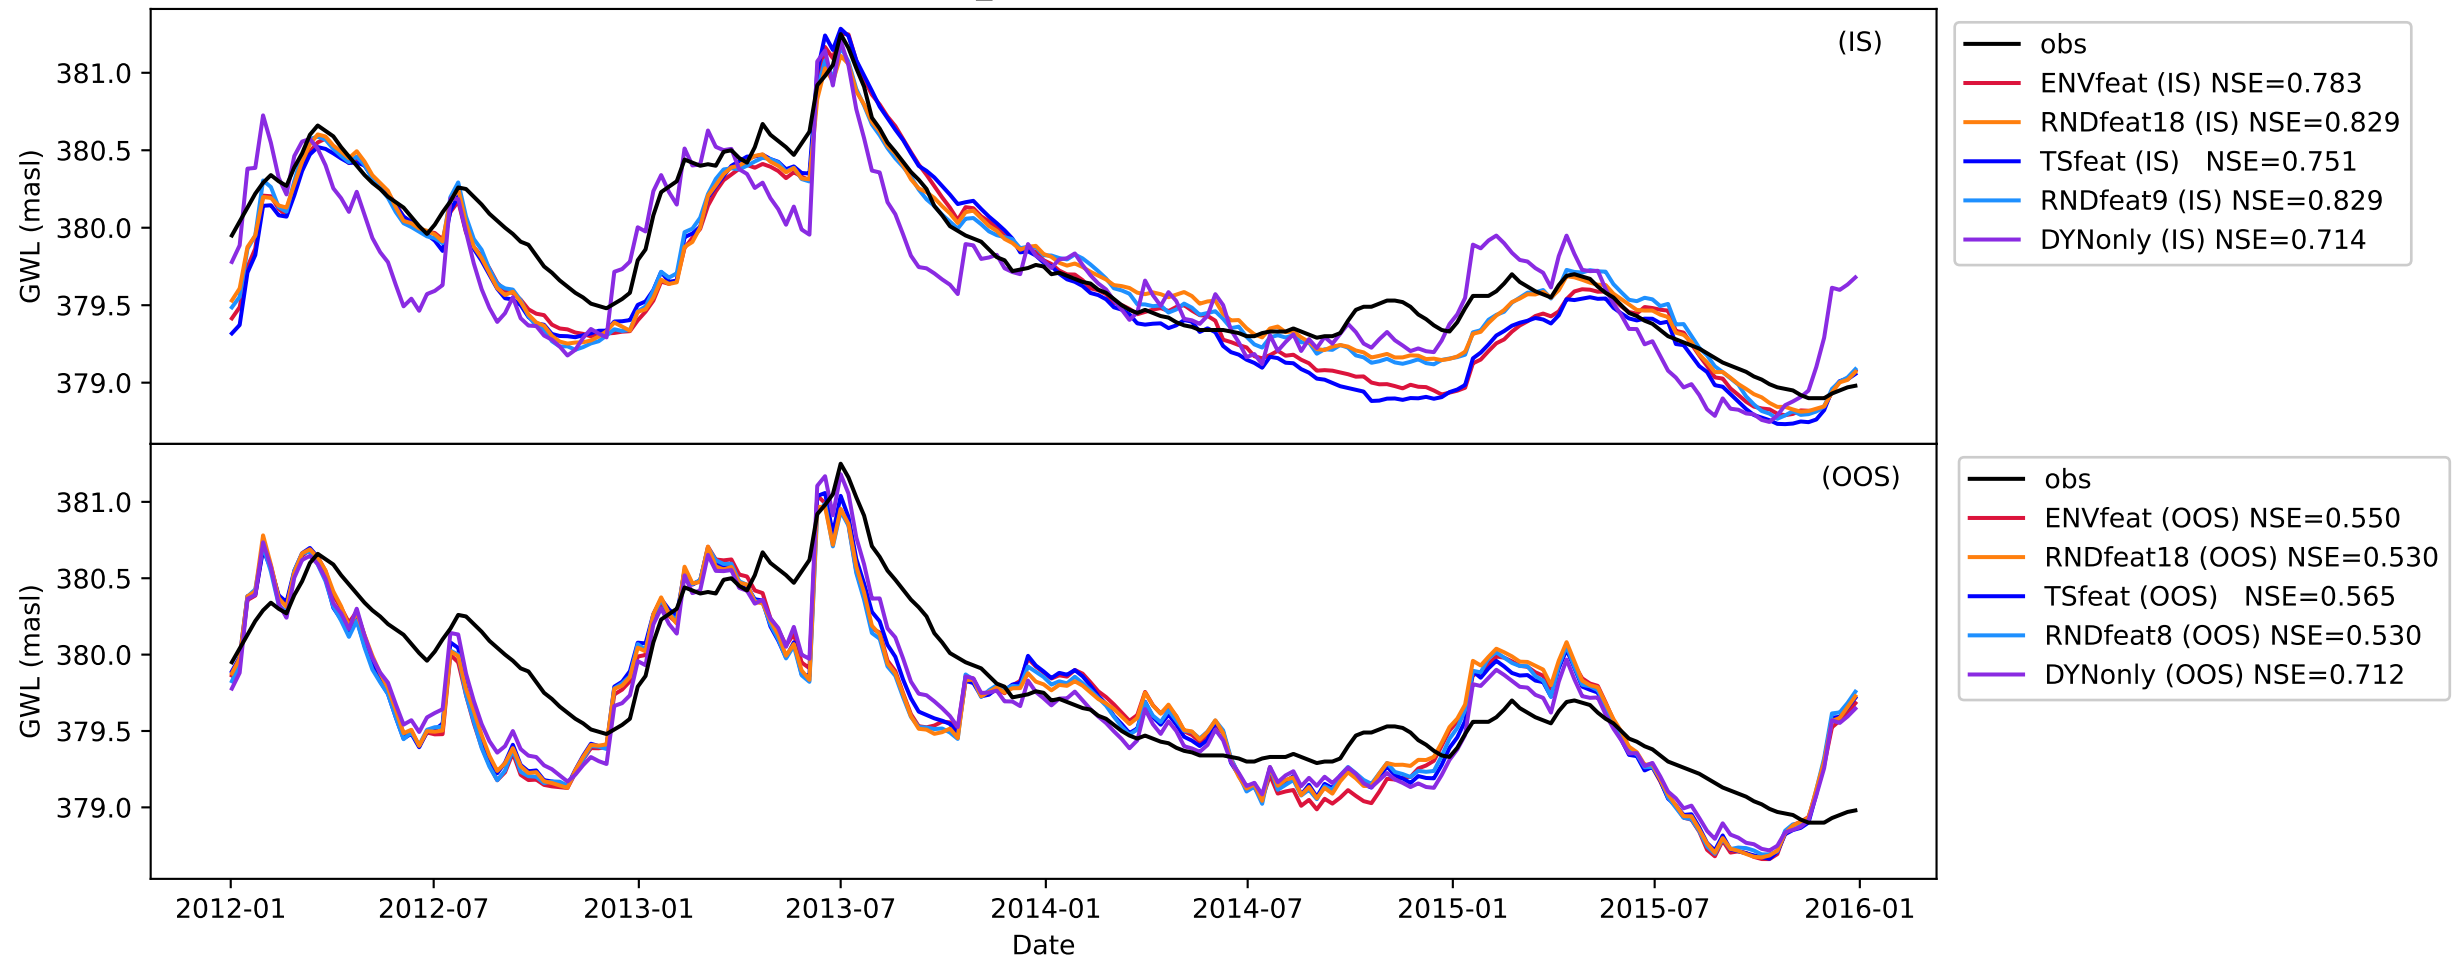

## SN\_52410759

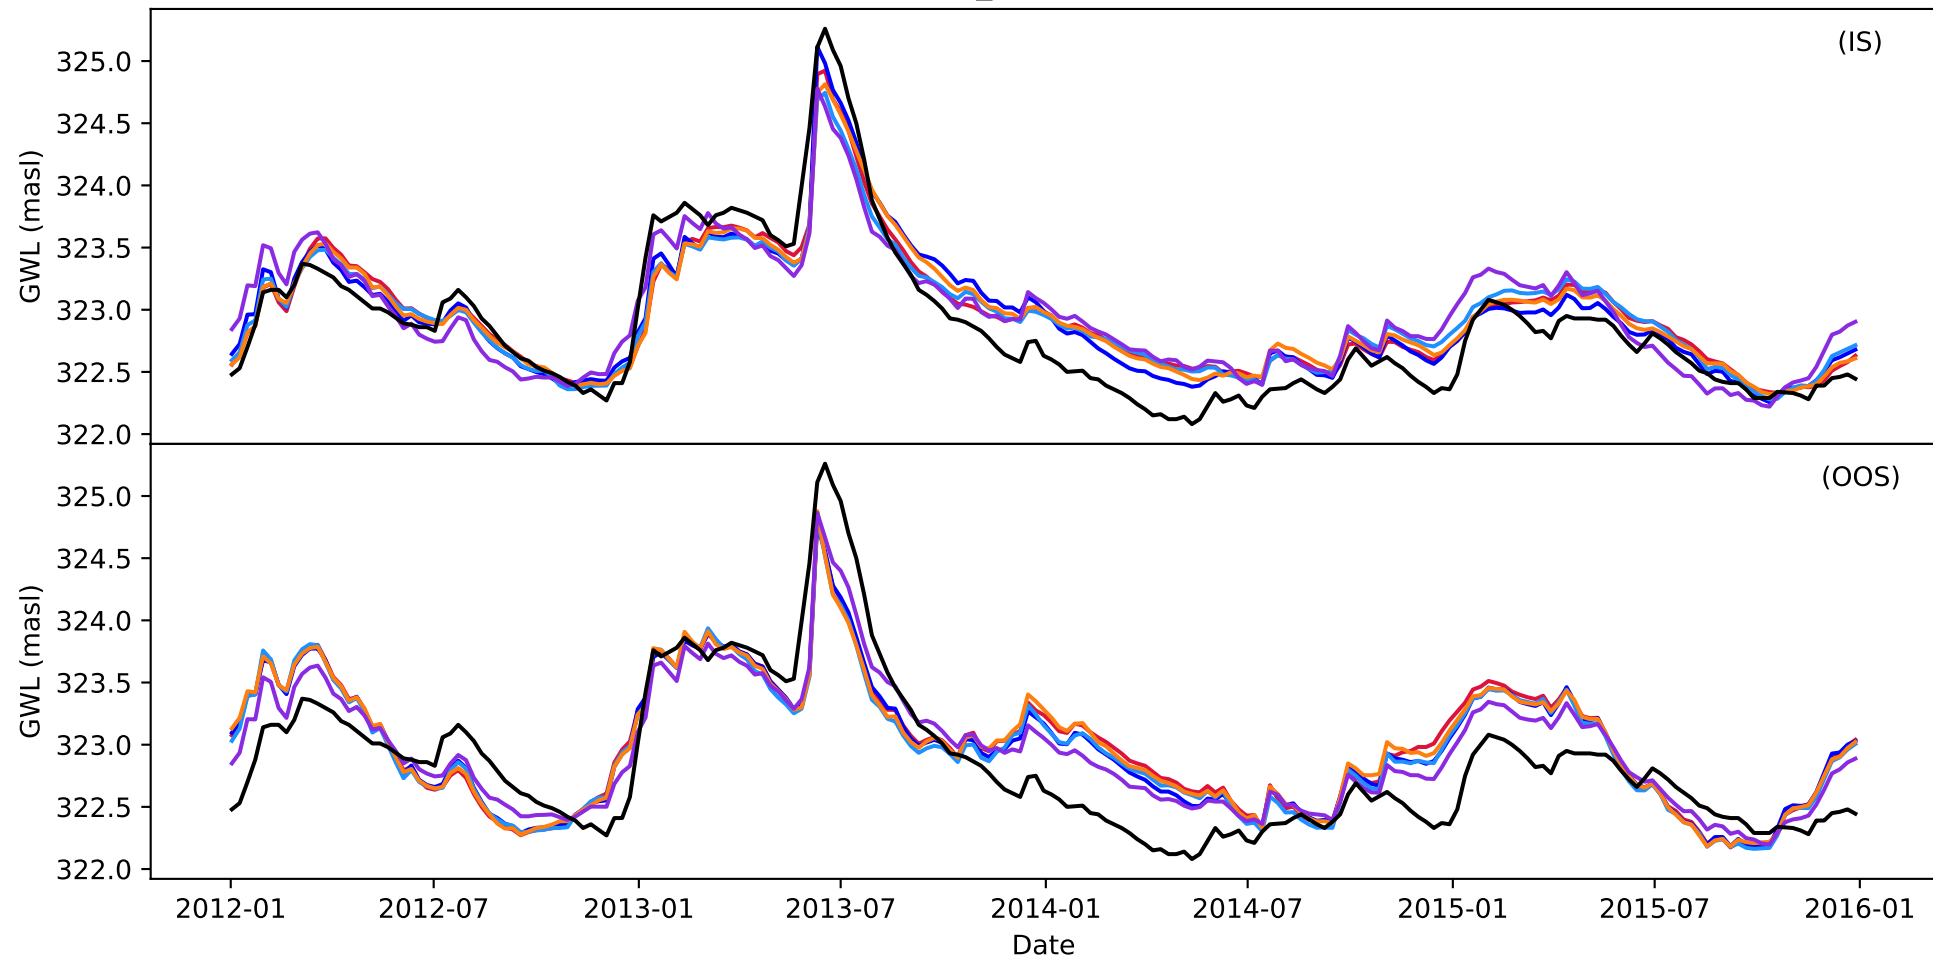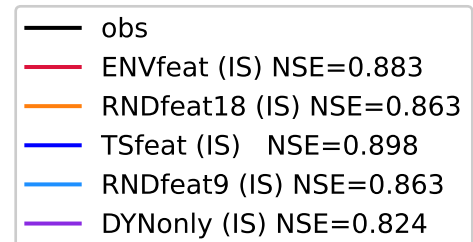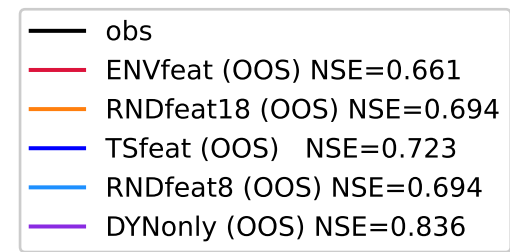

ST\_31340028

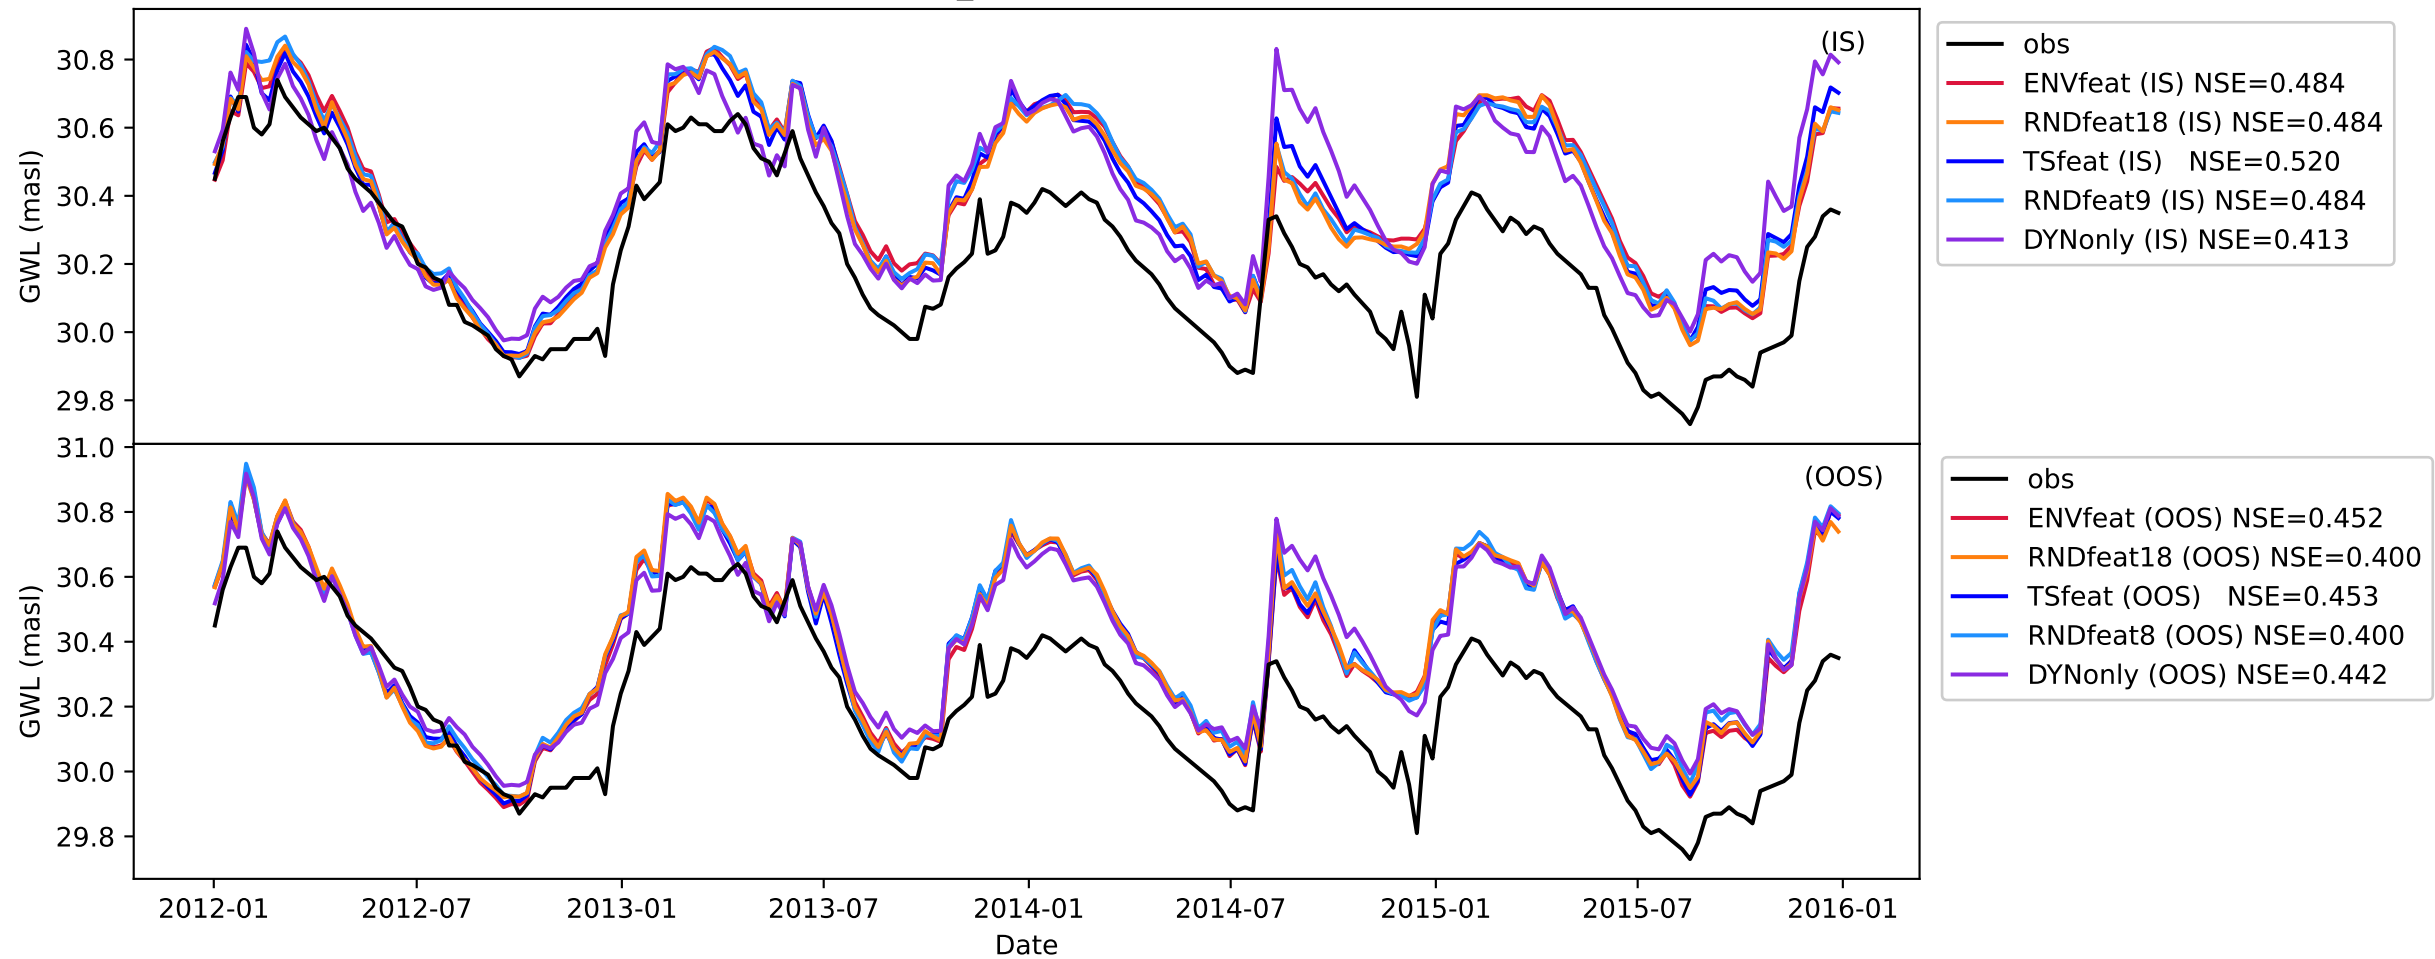

## ST\_33340002

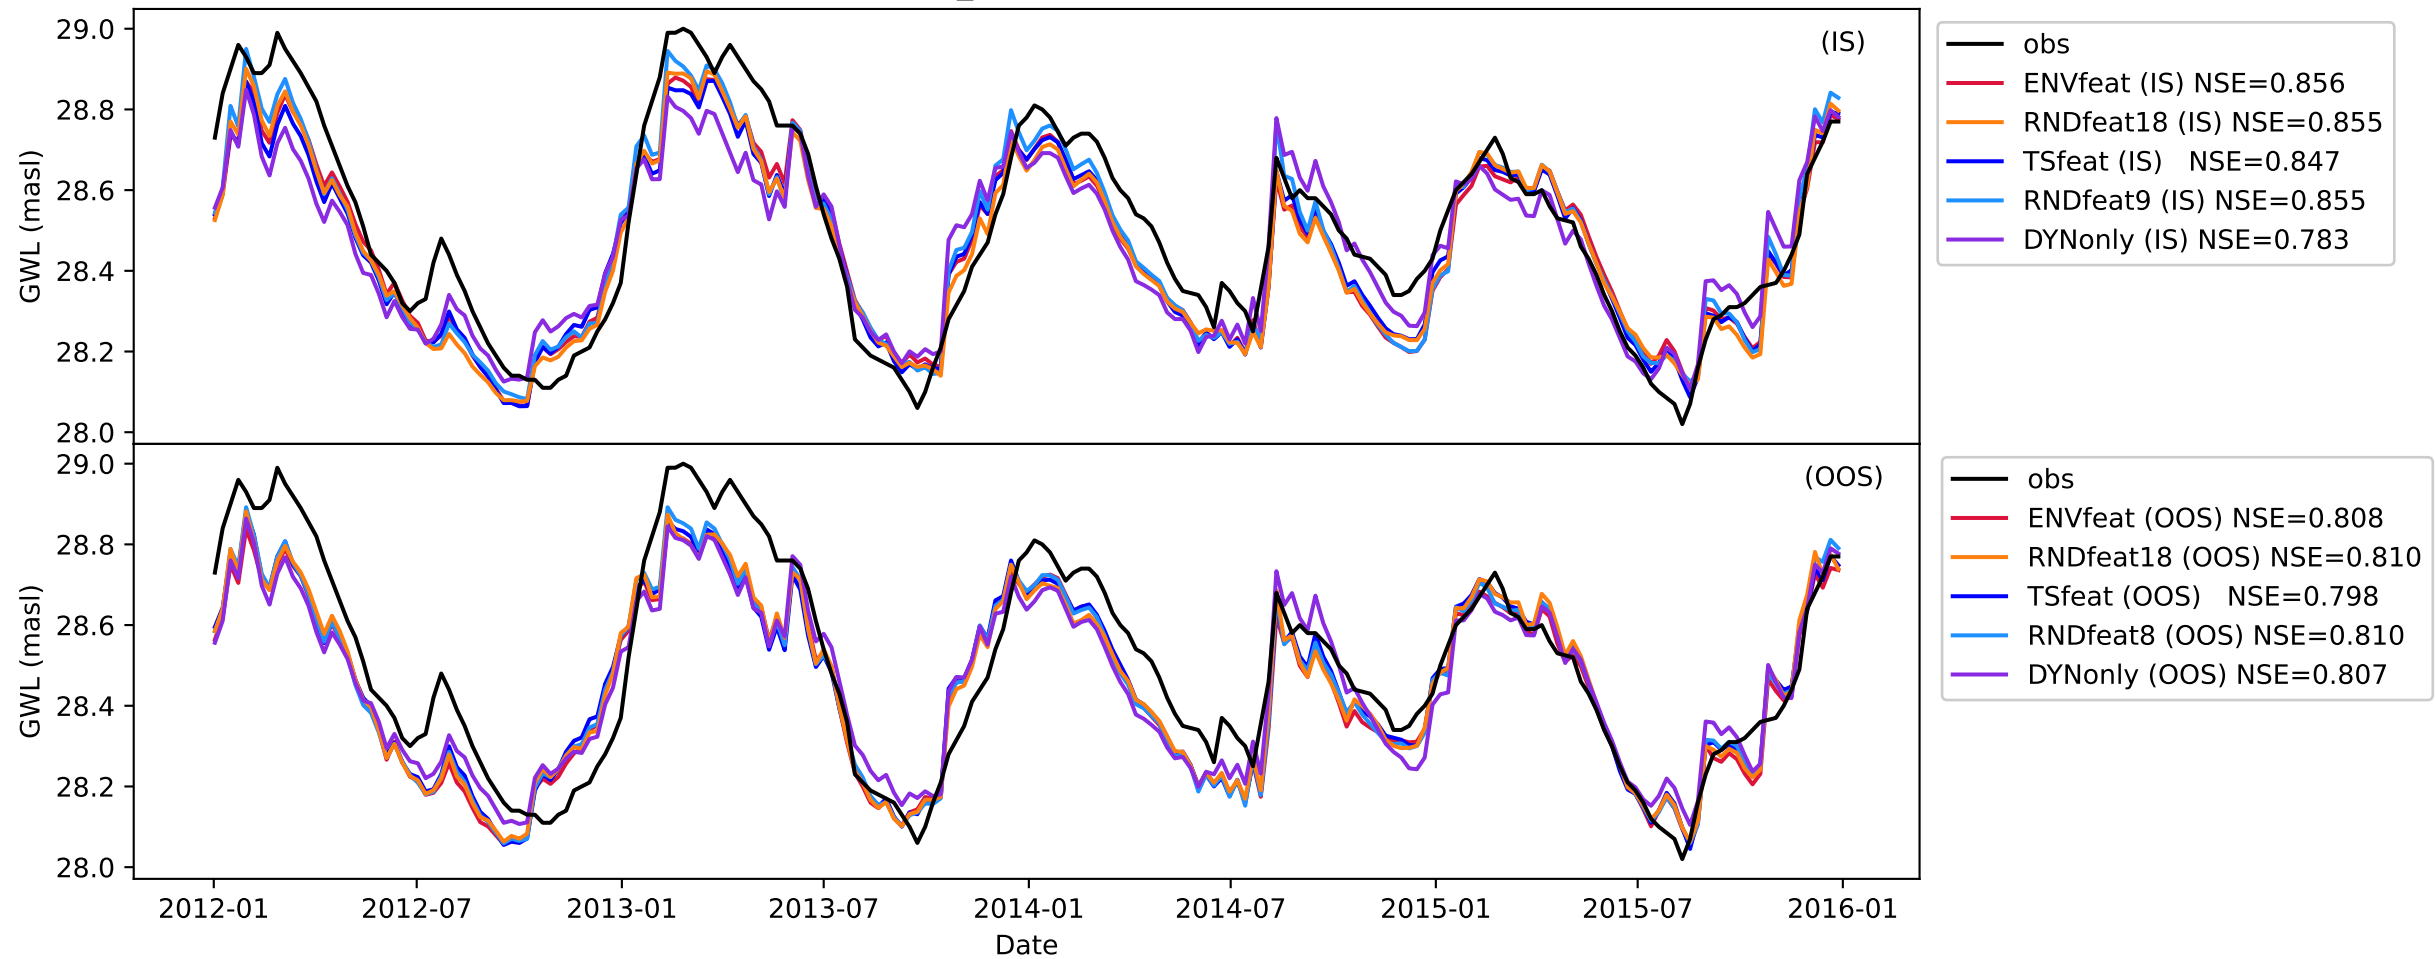



ST\_34376608

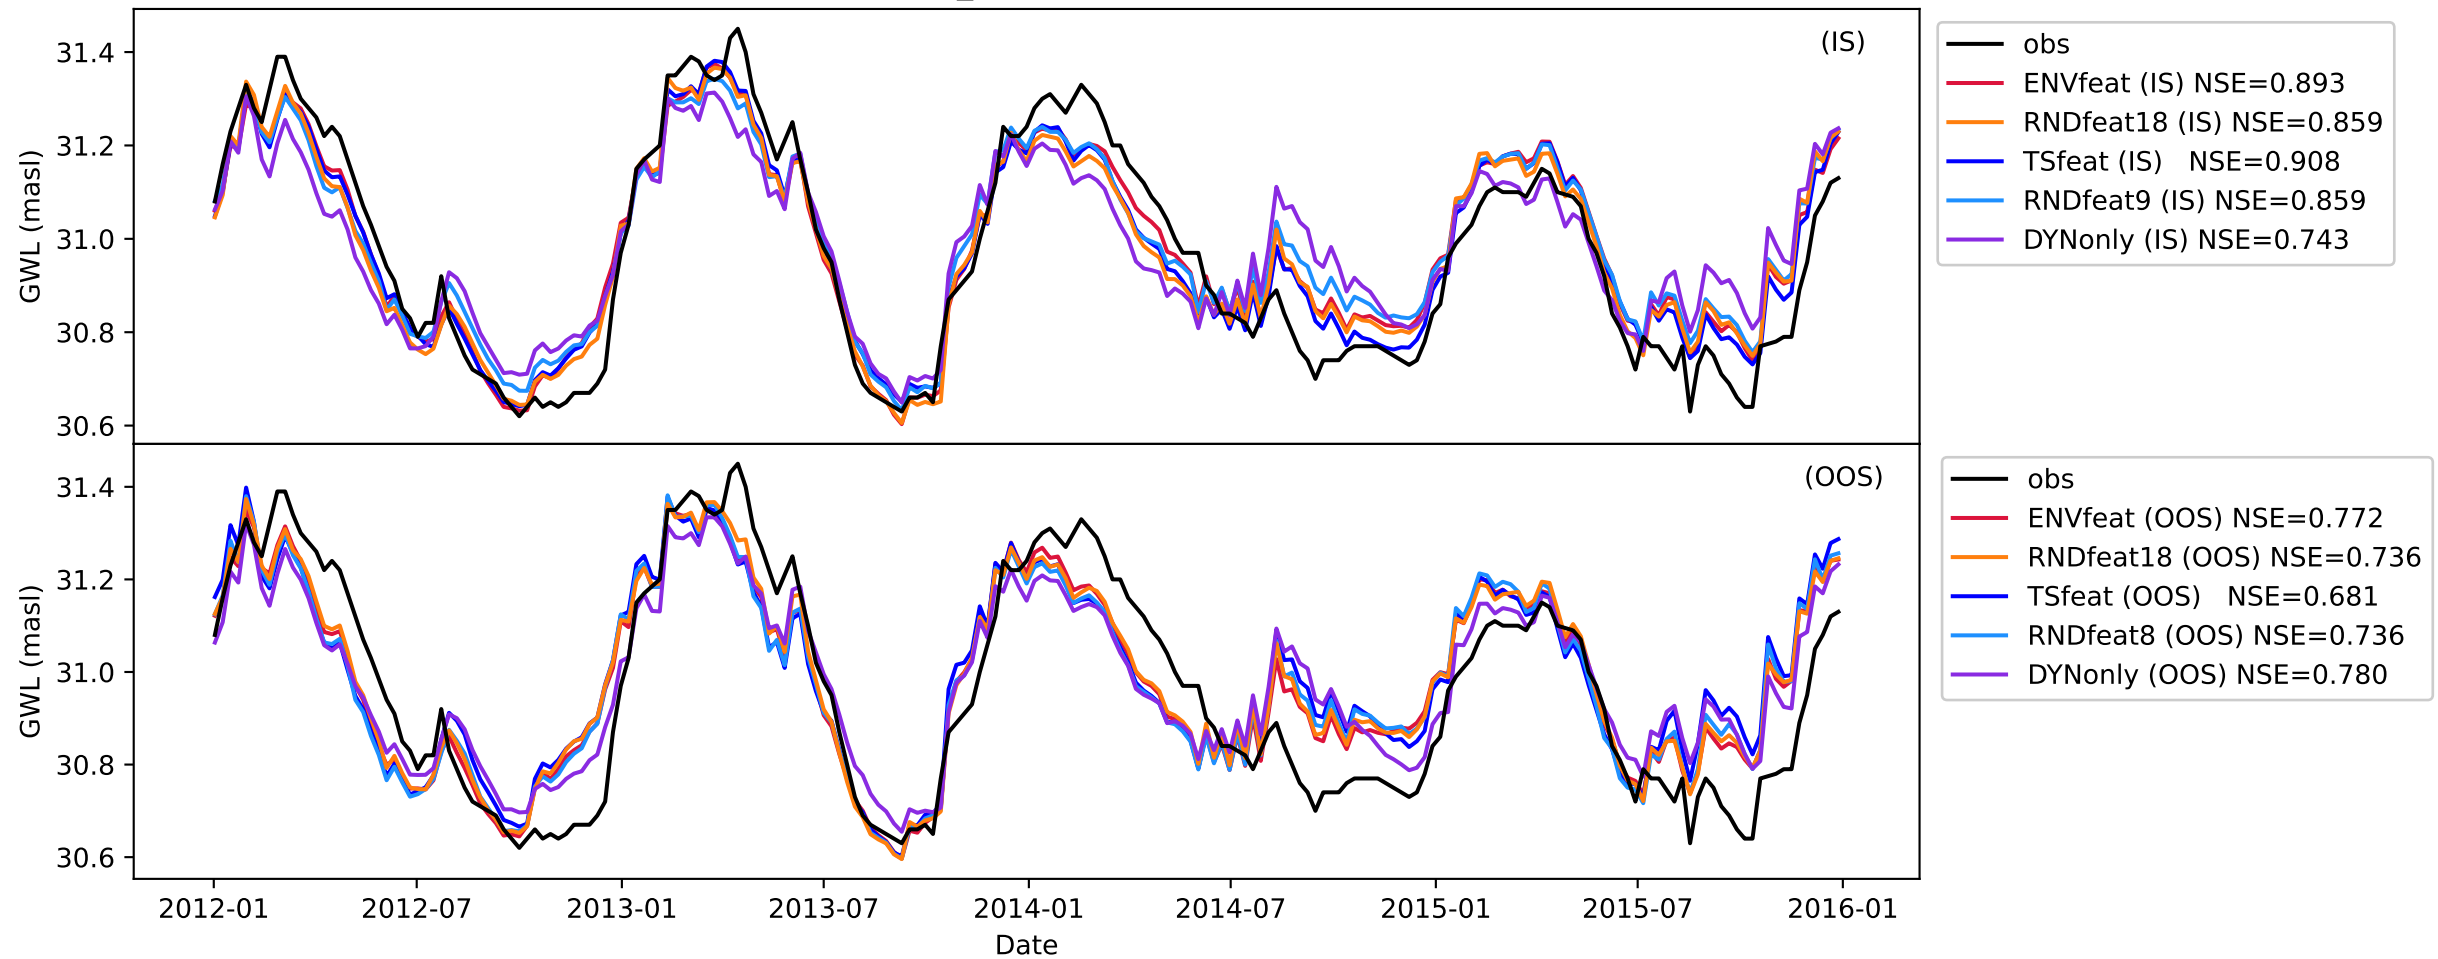

ST\_36340007

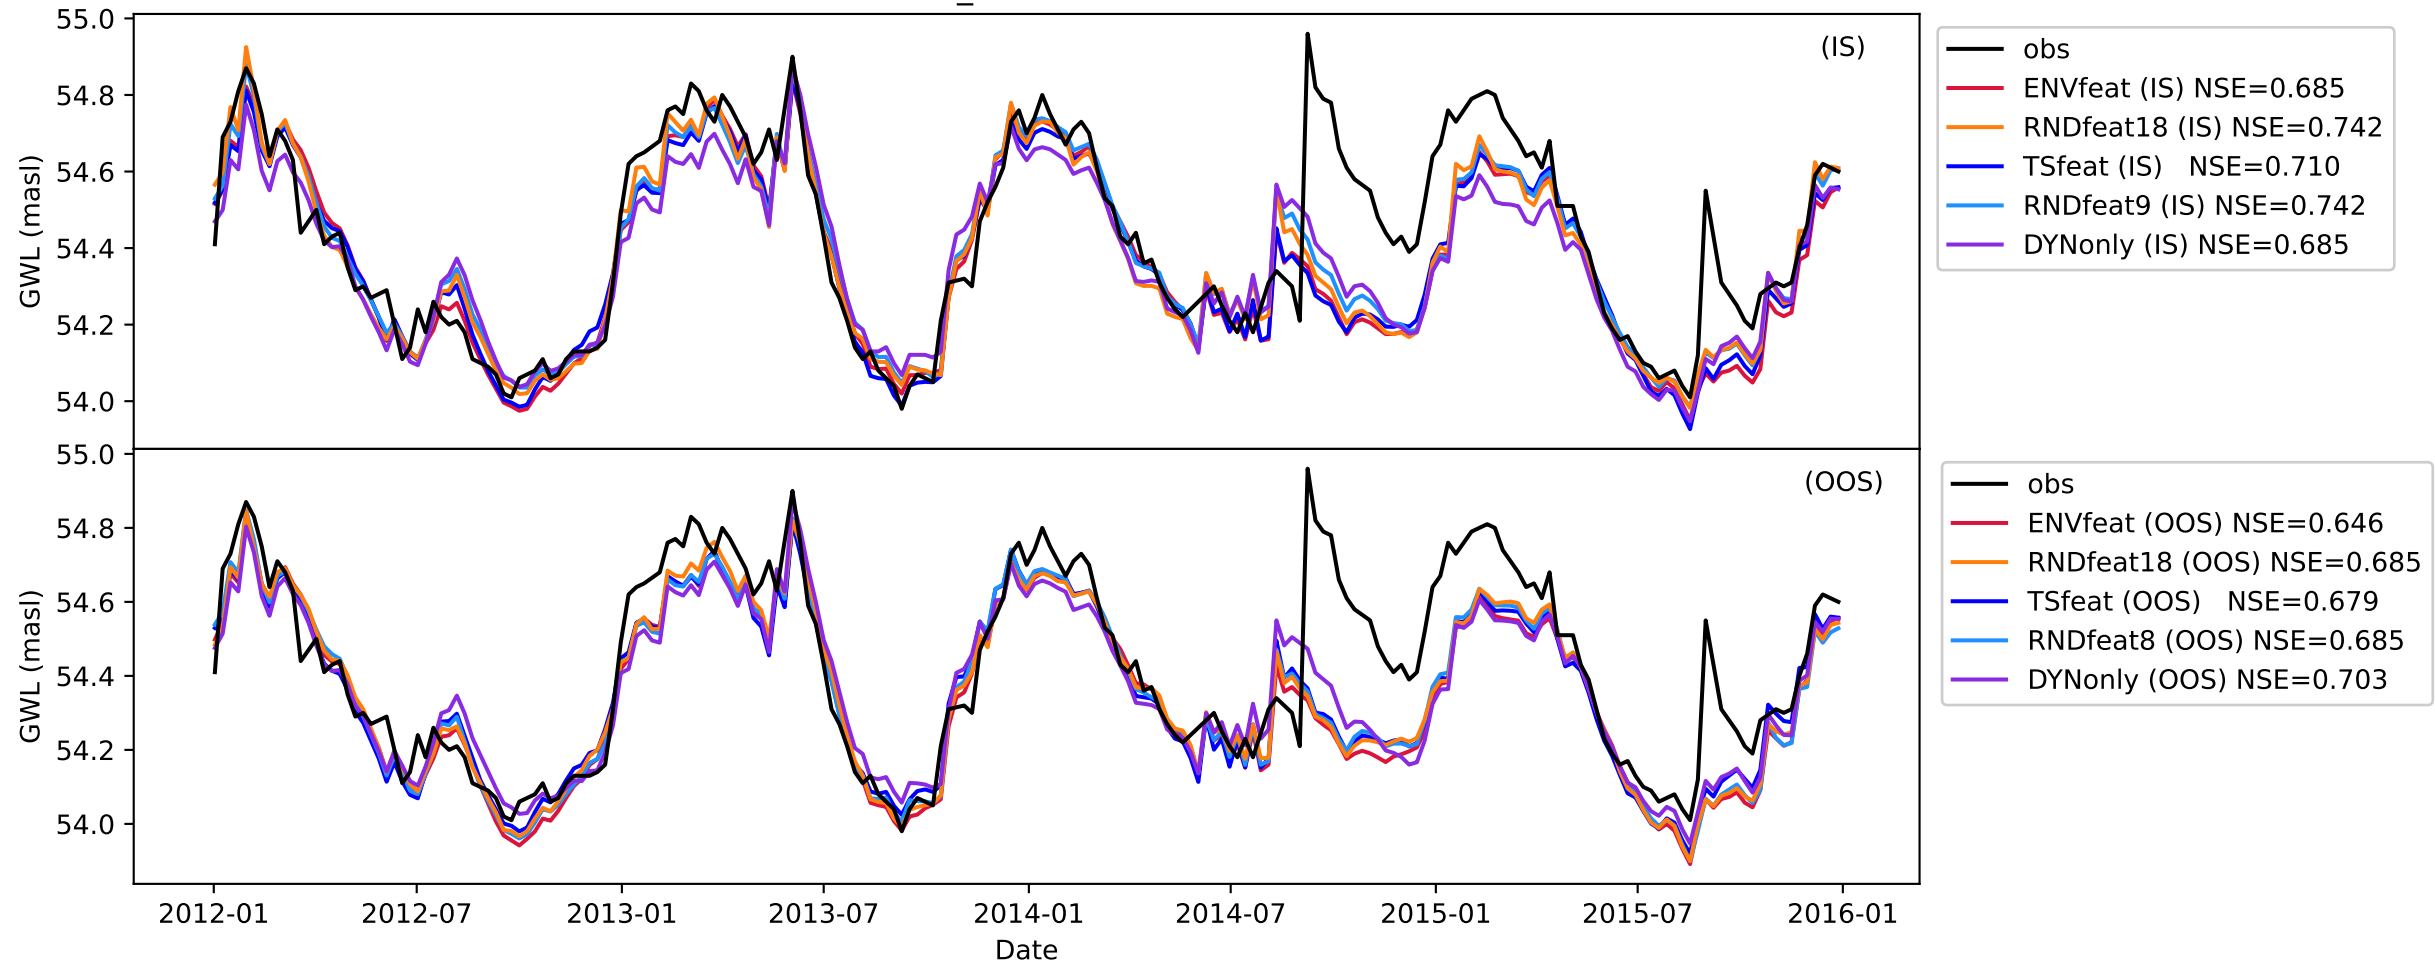

## ST\_39320023

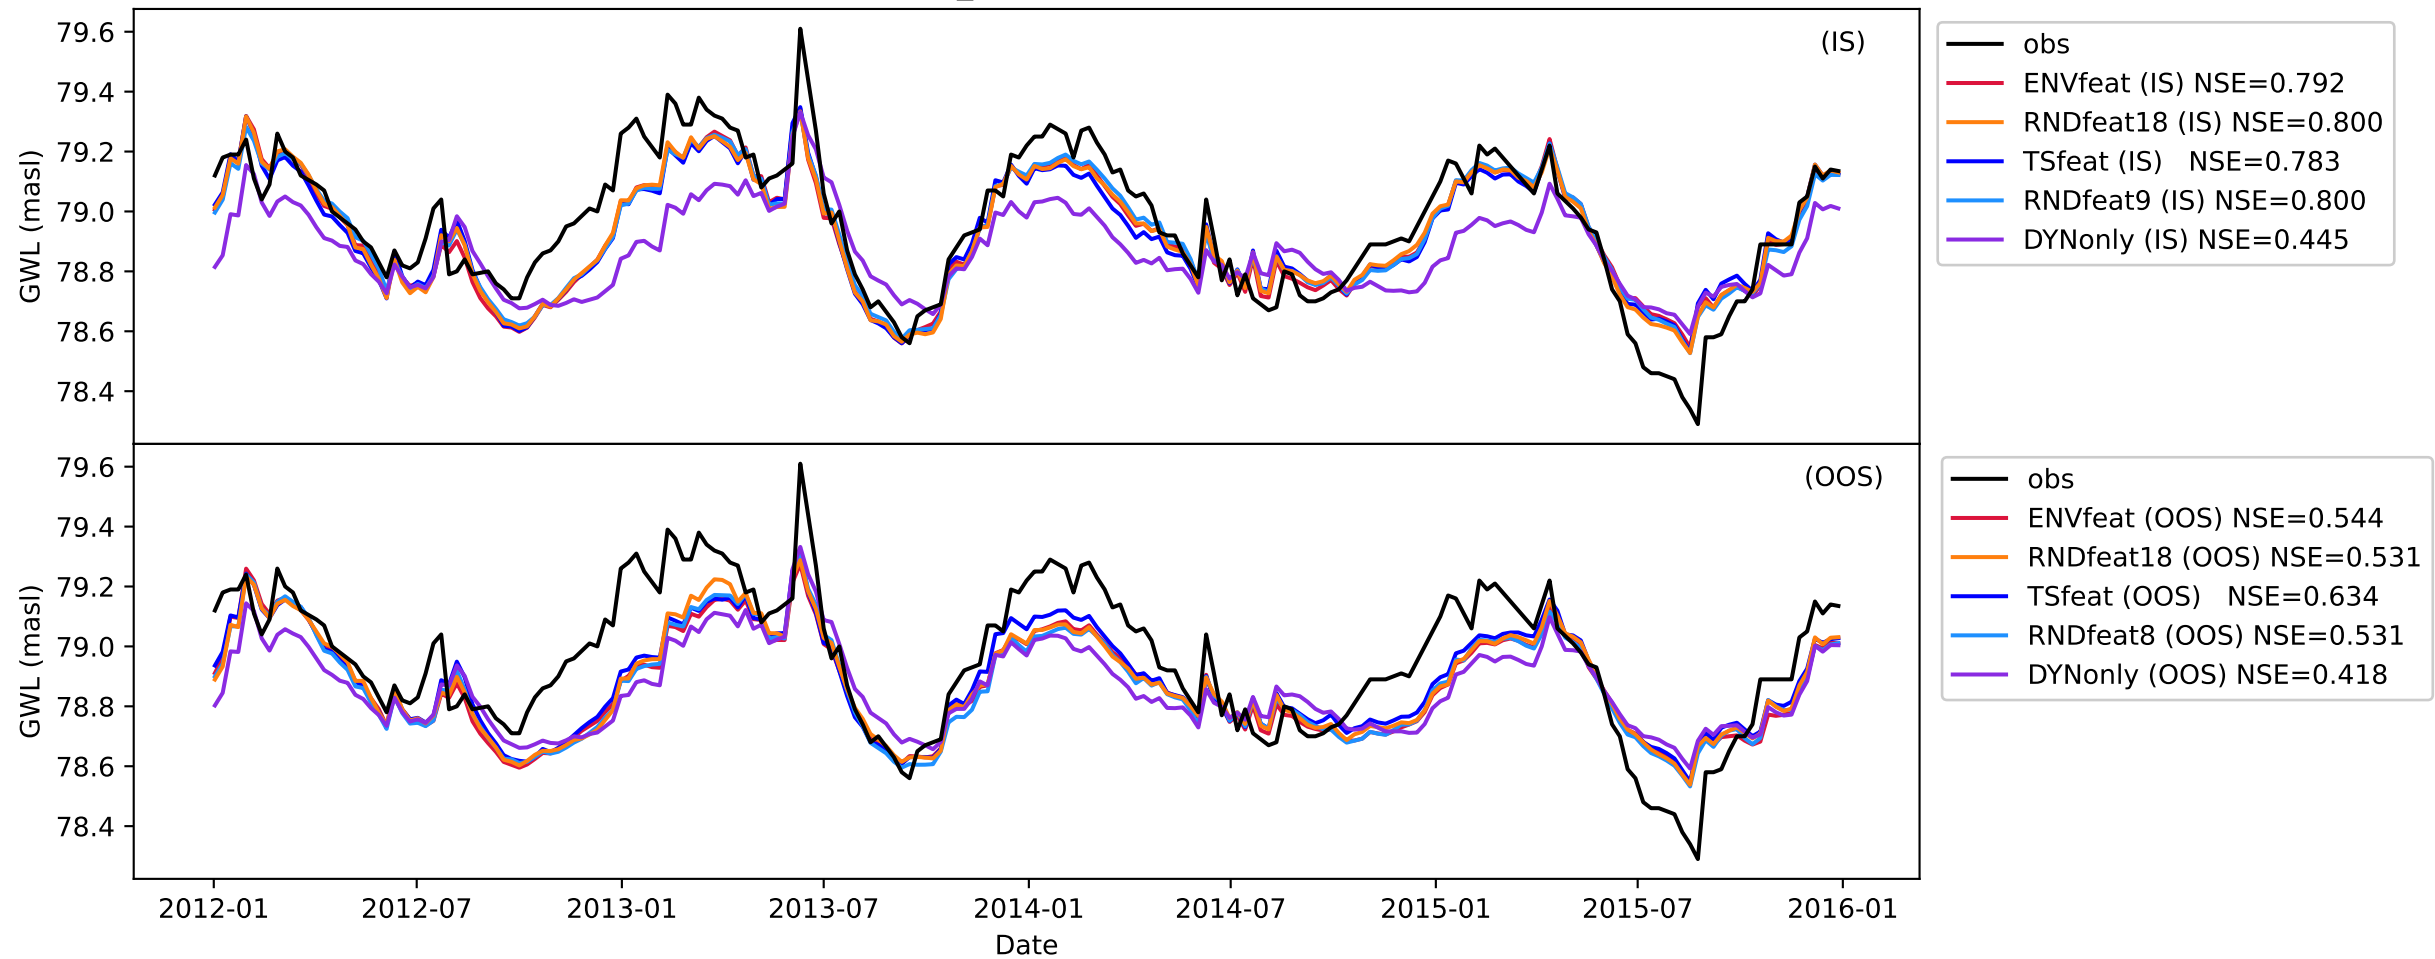

ST\_40415442

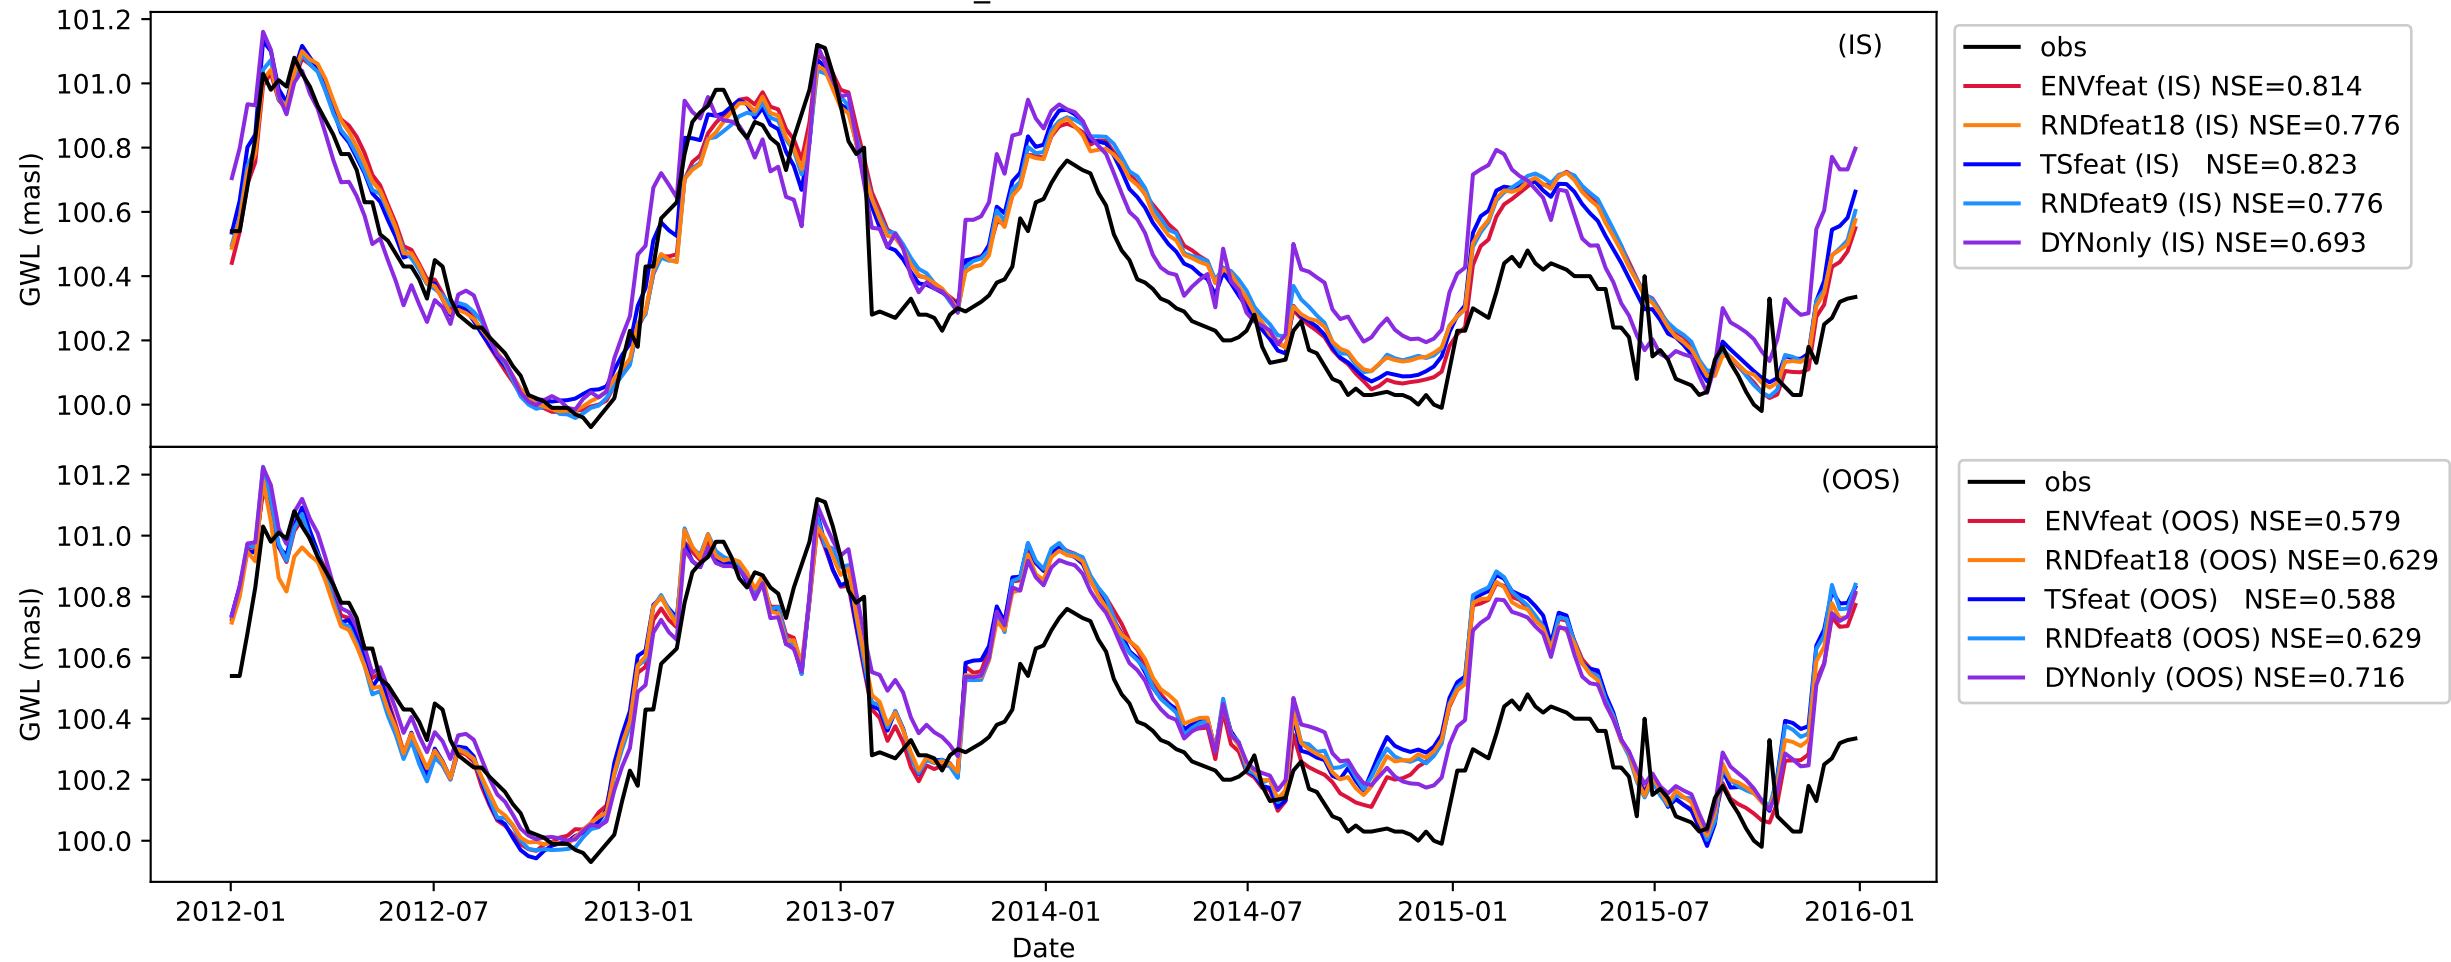

## ST\_43435116

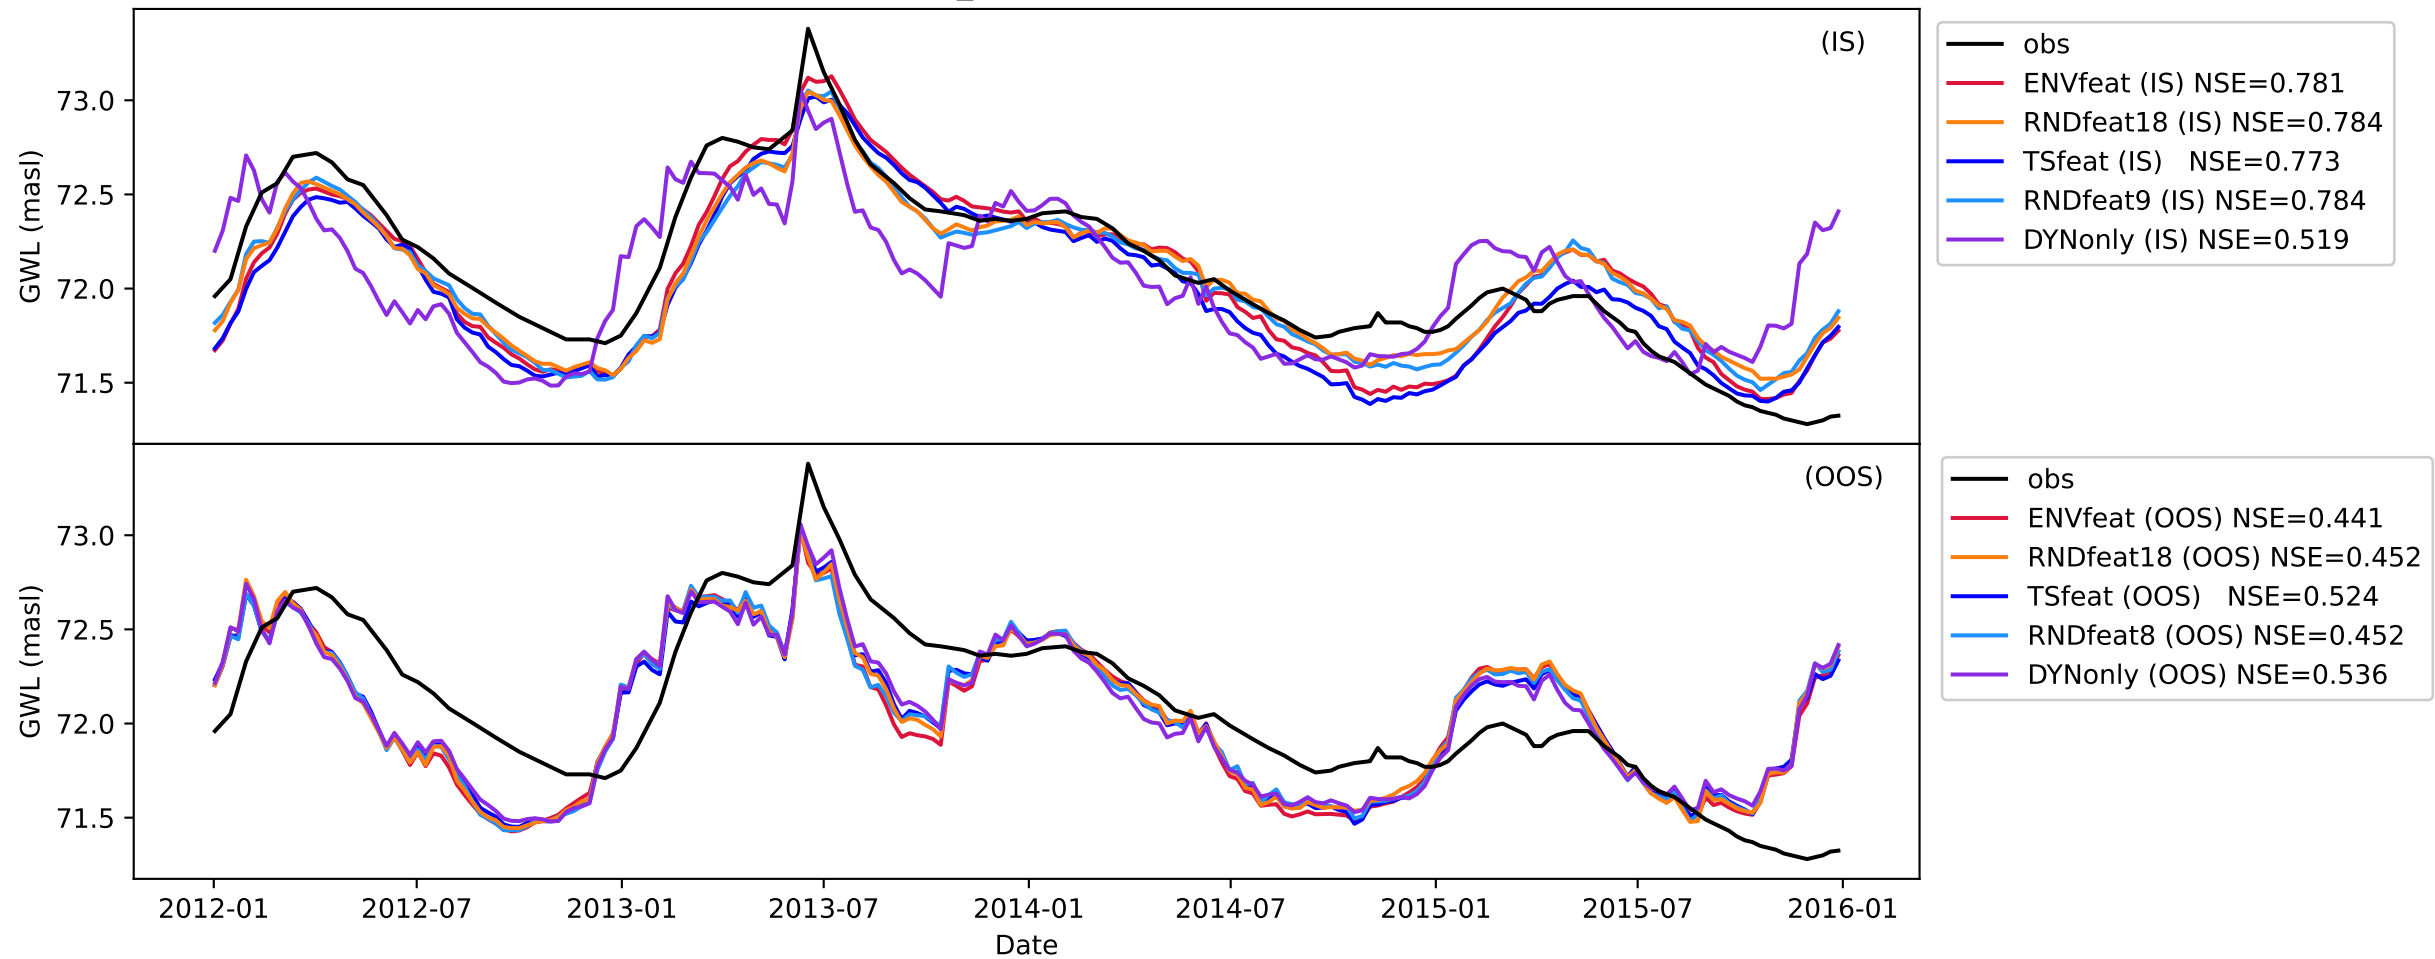

## ST\_44339213

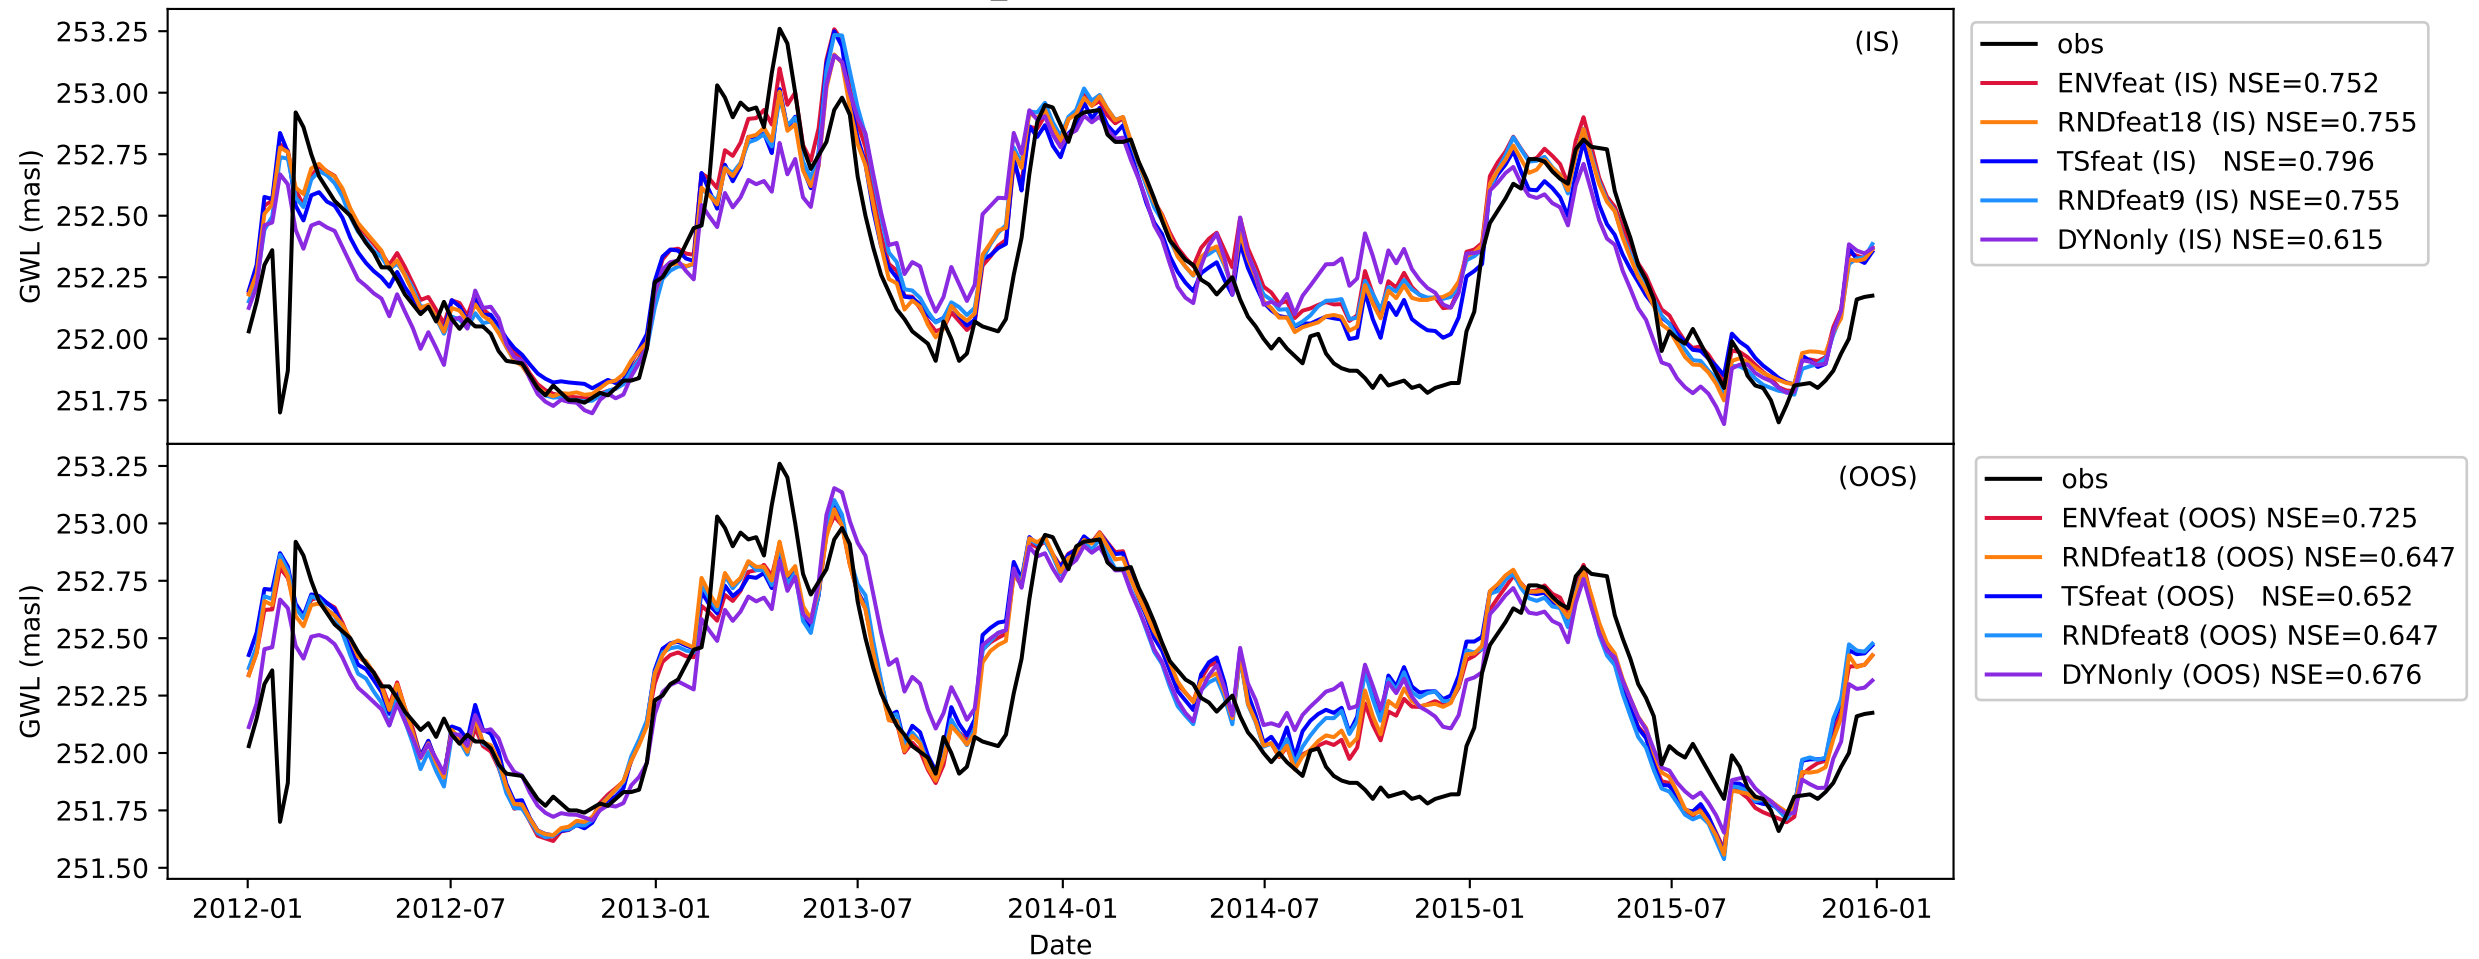

Supplement: Supplementary file 1 [file hess-28-525-2024-supplement.pdf]
